# Supplementary material for: Locomotor behavior of Neocaridina palmata: a study with leachates from UV-weathered microplastics
Source: PeerJ. 2021 Nov 9;9:e12442. doi: 10.7717/peerj.12442 (PMC8588861; doi:10.7717/peerj.12442)
Supplement: Supplemental Information 2 — Raw measurements of water parameters, room temperature and humidity, mortality, molting and all analyzed video parameters of the freshwater shrimps on days 1, 3, 7, and 14 in the test with recycled LDPE without UV-A/B irradiation. [file peerj-09-12442-s002.xlsx]

## Sheet: timetable
	day	-1	0	1	2	3	4	5	6	7	8	9	10	11	12	13	14
	datum	2019-10-31	2019-11-01	2019-11-02	2019-11-03	2019-11-04	2019-11-05	2019-11-06	2019-11-07	2019-11-08	2019-11-09	2019-11-10	2019-11-11	2019-11-12	2019-11-13	2019-11-14	2019-11-15
	to do	Preparations	start of test														end of test
			Feeding
				mortality/ecdysis control
				video		video				video							video
							water exchange				water exchange				water exchange
			Water parameters														Water parameters
											Ammonium						Ammonium

## Sheet: water parameter
		pH	conductivity	oxygen		temperature	CaCO3			ammonium
			[µS/cm]	[mg/L]	[%]	[°C]	[°d]	[mmol/L]	[mg/L]	[mg/L]
Test start	medium	7.58	480	8.37	99.7	23.1	3.4	1.2	73.224	0
day 8	NC	7.66	584	8.2	98.6	23.3	4.7	1.7	103.734	1.6
	PC	7.99	8610	7.63	92.3	23.7	4.7	1.7	103.734	1.6
	SC	7.67	571	8.14	97.8	23.3	4.3	1.5	91.53	1.61
	0.4 g/L	7.78	577	8.3	99.4	23.1	4.8	1.8	109.836	1.6
	1 g/L	7.72	555	8.24	98.8	23.2	4.4	1.6	97.632	1.6
	2.5 g/L	7.72	578	8.2	98.2	23.1	5	1.8	109.836	1.6
	6.25 g/L	7.73	565	8.14	97.8	23.3	4.7	1.7	103.734	2
	15.6 g/L	7.69	544	8.18	98.1	23.2	4.3	1.5	91.53	1.6
end of test	NC	7.6	556	8.36	100.5	23	3.6	1.3	79.326	0.4
	SC	7.5	514	8.08	97.5	23.2	3.9	1.4	85.428	0.3
	0.4 g/L	7.38	537	7.58	91.5	23.2	4.1	1.5	91.53	0.3
	1 g/L	7.51	512	7.93	96.2	23.5	3.9	1.4	85.428	0.3
	2.5 g/L	7.59	538	7.96	96.3	23.4	4.1	1.5	91.53	0.3
	6.25 g/L	7.59	535	7.95	96.3	23.4	4	1.45	88.479	0.3
	15.6 g/L	7.61	520	8.03	97.1	23.3	4.1	1.5	91.53	0.3
mean		7.645	544.4	8.08062	97.2562	23.2687	4.25	1.53437	93.6276	0.963125
SD		0.132665	28.3309	0.222387	2.34786	0.168518	0.434454	0.166507	10.1603	0.698675

## Sheet: mortality
Treatment		dead individuals on day
		1	2	3	4	5	6	7	8	9	10	11	12	13	14		1 = dead
NC	1	0	0	0	0	0	0	0	0	0	0	0	0	0	0		0 = abnormal behavior (e.g. back position)
	2	0	0	0	0	0	0	0	0	0	0	0	0	0	0		0 = normal
	3	0	0	0	0	0	0	0	0	0	0	0	0	0	0
	4	0	0	0	0	0	0	0	0	0	0	0	0	0	0
	5	0	0	0	0	0	0	0	0	0	0	0	0	0	0
	6	0	0	0	0	0	0	0	0	0	0	0	0	0	0
	7	0	0	0	0	0	0	0	0	0	0	0	0	0	0
	8	0	0	0	0	0	0	0	0	0	0	0	0	0	0
PC	1	0	0	1	1	1	1	1	1	1	1	1	1	1	1
	2	0	0	0	1	1	1	1	1	1	1	1	1	1	1
	3	0	1	1	1	1	1	1	1	1	1	1	1	1	1
	4	0	0	1	1	1	1	1	1	1	1	1	1	1	1
	5	1	1	1	1	1	1	1	1	1	1	1	1	1	1
	6	0	0	0	0	0	1	1	1	1	1	1	1	1	1
	7	1	1	1	1	1	1	1	1	1	1	1	1	1	1
	8	0	0	0	0	0	0	1	1	1	1	1	1	1	1
SC	1	0	0	0	0	0	0	0	0	0	0	0	0	0	0
	2	0	0	0	0	0	0	0	0	0	0	0	0	0	0
	3	0	0	0	0	0	0	0	0	0	0	0	0	0	0
	4	0	0	0	0	0	0	0	0	0	0	0	0	0	0
	5	0	0	0	0	0	0	0	0	0	0	0	0	0	0
	6	0	0	0	0	0	0	0	0	0	0	0	0	0	0
	7	0	0	0	0	0	0	0	0	0	0	0	0	0	0
	8	0	0	0	0	0	0	0	0	0	0	0	0	0	0
0.4 g/L	1	0	0	0	0	0	0	0	0	0	0	0	0	0	0
	2	0	0	0	0	0	0	0	0	0	0	0	0	0	0
	3	0	0	0	0	0	0	0	0	0	0	0	0	0	0
	4	0	0	0	0	0	0	0	0	0	0	0	0	0	0
	5	0	0	0	0	0	0	0	0	0	0	0	0	0	0
	6	0	0	0	0	0	0	0	0	0	0	0	0	0	0
	7	0	0	0	0	0	0	0	0	0	0	0	0	0	0
	8	0	0	0	0	0	0	0	0	0	0	0	0	0	0
1 g/L	1	0	0	0	0	0	0	0	0	0	0	0	0	0	0
	2	0	0	0	0	0	0	0	0	0	0	0	0	0	0
	3	0	0	0	0	0	0	0	0	0	0	0	0	0	0
	4	0	0	0	0	0	0	0	0	0	0	0	0	0	0
	5	0	0	0	0	0	0	0	0	0	0	0	0	0	0
	6	0	0	0	0	0	0	0	0	0	0	0	0	0	0
	7	0	0	0	0	0	0	0	0	0	0	0	0	0	0
	8	0	0	0	0	0	0	0	0	0	0	0	0	0	0
2.5 g/L	1	0	0	0	0	0	0	0	0	0	0	0	0	0	0
	2	0	0	0	0	0	0	0	0	0	0	0	0	0	0
	3	0	0	0	0	0	0	0	0	0	0	0	0	0	0
	4	0	0	0	0	0	0	0	0	0	0	0	0	0	0
	5	0	0	0	0	0	0	0	0	0	0	0	0	0	0
	6	0	0	0	0	0	0	0	0	0	0	0	0	0	0
	7	0	0	0	0	0	0	0	0	0	0	0	0	0	0
	8	0	0	0	0	0	0	0	0	0	0	0	0	0	0
6.25 g/L	1	0	0	0	0	0	0	0	0	0	0	0	0	0	0
	2	0	0	0	0	0	0	0	0	0	0	0	0	0	0
	3	0	0	0	0	0	0	0	0	0	0	0	0	0	0
	4	0	0	0	0	0	0	0	0	0	0	0	0	0	0
	5	0	0	0	0	0	0	0	0	0	0	0	0	0	0
	6	0	0	0	0	0	0	0	0	0	0	0	0	0	0
	7	0	0	0	0	0	0	0	0	0	0	0	0	0	0
	8	0	0	0	0	0	0	0	0	0	0	0	0	0	0
15.6 g/L	1	0	0	0	0	0	0	0	0	0	0	0	0	0	0
	2	0	0	0	0	0	0	0	0	0	0	0	0	0	0
	3	0	0	0	0	0	0	0	0	0	0	0	0	0	0
	4	0	0	0	0	0	0	0	0	0	0	0	0	0	0
	5	0	0	0	0	0	0	0	0	0	0	0	0	0	0
	6	0	0	0	0	0	0	0	0	0	0	0	0	0	0
	7	0	0	0	0	0	0	0	0	0	0	0	0	0	0
	8	0	0	0	0	0	0	0	0	0	0	0	0	0	0

## Sheet: ecdysis
Treatment		ecdysis on day														no. of ecdysis			inter-molt-period [d]
		1	2	3	4	5	6	7	8	9	10	11	12	13	14	per replicate	mean	SD
NC	1	0	0	0	0	0	0	0	1	0	0	0	0	0	0	1	1.125	0.330719			1 = new exuviae found
	2	0	0	0	0	0	0	0	0	1	0	0	0	0	0	1					0 = no new exuviae
	3	0	0	0	0	0	0	0	0	1	0	0	0	0	0	1
	4	0	1	0	0	0	0	0	0	0	1	0	0	0	0	2			8
	5	0	0	0	0	0	1	0	0	0	0	0	0	0	0	1
	6	0	0	0	0	0	0	0	0	0	1	0	0	0	0	1
	7	0	0	0	0	0	0	0	0	0	1	0	0	0	0	1
	8	0	0	0	0	0	0	0	0	0	0	1	0	0	0	1
PC	1	0	0													0	0.125	0.330719
	2	0	0	0												0
	3	0														0
	4	0	0													0
	5															0
	6	0	0	0	0	0										0
	7															0
	8	0	0	0	0	0	0	1								1
SC	1	0	0	0	1	0	0	0	0	0	0	1	0	0	0	2	1.5	0.5
	2	0	0	0	0	0	1	0	0	0	0	0	0	0	0	1
	3	0	0	0	0	0	1	0	0	0	0	0	0	0	1	2			8
	4	0	0	0	1	0	0	0	0	0	0	0	0	0	1	2			10
	5	0	0	0	0	0	0	0	0	1	0	0	0	0	0	1
	6	0	0	0	0	0	0	0	1	0	0	0	0	0	0	1
	7	0	0	0	1	0	0	0	0	0	0	0	0	0	1	2			10
	8	0	0	0	0	0	0	0	0	0	0	0	1	0	0	1
0.4 g/L	1	0	1	0	0	0	0	0	0	0	0	0	0	0	0	1	1.25	0.433013
	2	0	0	0	0	0	0	1	0	0	0	0	0	0	0	1
	3	0	0	0	0	0	0	0	0	0	1	0	0	0	0	1
	4	0	0	0	0	0	0	0	0	1	0	0	0	0	0	1
	5	0	0	0	0	0	0	0	0	0	1	0	0	0	0	1
	6	0	0	0	0	0	0	0	1	0	0	0	0	0	0	1
	7	0	0	0	1	0	0	0	0	0	0	0	0	1	0	2			9
	8	0	1	0	0	0	0	0	0	0	1	0	0	0	0	2			8
1 g/L	1	0	0	0	0	0	1	0	0	0	0	0	0	0	0	1	1.25	0.661438
	2	0	0	0	0	0	1	0	0	0	0	0	0	0	0	1
	3	0	0	0	1	0	0	0	0	0	0	1	0	0	0	2			7
	4	0	0	1	0	0	0	0	0	0	0	0	0	1	0	2			10
	5	0	0	0	0	0	1	0	0	0	0	0	0	0	0	1
	6	0	0	0	0	0	0	0	0	0	0	0	0	0	0	0
	7	0	0	0	0	0	0	0	0	1	0	0	0	0	0	1
	8	0	1	0	0	0	0	0	0	0	1	0	0	0	0	2			8
2.5 g/L	1	1	0	0	0	0	0	0	0	0	0	1	0	0	0	2	1.625	0.484123	10
	2	1	0	0	0	0	0	0	0	0	0	0	1	0	0	2			11
	3	1	0	0	0	0	0	0	0	0	0	0	0	1	0	2			12
	4	0	0	0	0	0	0	1	0	0	0	0	0	0	0	1
	5	0	0	0	0	1	0	0	0	0	0	0	0	0	0	1
	6	1	0	0	0	0	0	0	0	0	1	0	0	0	0	2			9
	7	0	0	0	0	0	1	0	0	0	0	0	0	0	0	1
	8	1	0	0	0	0	0	0	0	0	0	0	1	0	0	2			11
6.25 g/L	1	0	0	0	0	0	0	0	0	1	0	0	0	0	0	1	1.125	0.599479
	2	0	0	0	0	0	0	0	0	1	0	0	0	0	0	1
	3	0	1	0	0	0	0	0	0	0	0	0	1	0	0	2			10
	4	0	0	1	0	0	0	0	0	0	0	0	0	1	0	2			10
	5	0	0	0	0	0	0	1	0	0	0	0	0	0	0	1
	6	0	0	0	0	0	0	0	0	0	0	0	0	0	0	0
	7	0	0	0	0	0	1	0	0	0	0	0	0	0	0	1
	8	1	0	0	0	0	0	0	0	0	0	0	0	0	0	1
15.6 g/L	1	1	0	0	0	0	0	0	0	0	0	0	0	0	0	1	1.5	0.5
	2	0	0	0	1	0	0	0	0	0	0	0	0	1	0	2			9
	3	0	1	0	0	0	0	0	0	0	0	0	0	1	0	2			11
	4	0	0	0	0	0	1	0	0	0	0	0	0	0	0	1
	5	0	0	0	1	0	0	0	0	0	0	0	0	1	0	2			9
	6	0	0	0	0	0	0	1	0	0	0	0	0	0	0	1
	7	0	0	0	0	0	1	0	0	0	0	0	0	0	0	1
	8	0	0	0	1	0	0	0	0	0	0	0	0	0	1	2			10
															Mean	1.33929
															SD	0.543691

## Sheet: body parameter
Treatment		sex	body length	carapax length
		(0=f, 1=m)	[mm]	[mm]
NC	1	1	14.08	5.22		13.7146
	2	1	12.31	4.98		1.57747
	3	0	14.06	5.87
	4	1	11.71	5.12
	5	0	12.59	5.42
	6	0	13.23	5.53
	7	0	14.01	6.14
	8	0	15.56	7.04
PC	1	1	13.47	5.55
	2	1	14.17	6.02
	3	0	12.27	5.05
	4	0	14.09	5.64
	5	1	13.32	5.52
	6	1	11.98	4.87
	7	1	13.31	5.69
	8	0	/	/
SC	1	1	12.71	5.39
	2	0	13.95	5.96
	3	0	14.31	6.03
	4	1	13.22	5.41
	5	0	14.21	5.94
	6	1	12.17	5.16
	7	0	13.08	5.55
	8	1	12.41	5.2
0.4 g/L	1	0	14.46	6
	2	0	15.7	6.61
	3	0	15.65	6.74
	4	0	13.29	5.62
	5	0	14.94	6.22
	6	1	11.86	5.07
	7	1	13.68	6.03
	8	1	14.2	5.83
1 g/L	1	0	13.86	5.97
	2	1	13.28	5.24
	3	1	12.56	5.28
	4	1	14.31	5.72
	5	0	6.16	14.15
	6	0	16.55	6.37
	7	0	16.07	7.08
	8	1	13	5.48
2.5 g/L	1	1	12.23	4.72
	2	0	15.67	6.48
	3	0	13.97	6.49
	4	0	13.88	5.75
	5	0	14.31	6
	6	1	13.68	5.46
	7	0	15.19	6.2
	8	0	12.76	5.15
6.25 g/L	1	0	13.73	5.88			Bodylength	Mean	13.4473
	2	1	11.7	4.83				SD	1.51705
	3	0	14.62	6.62
	4	0	14.36	5.86			% males	39.0625
	5	0	15.86	6.77
	6	0	12.9	5.37
	7	1	13.59	5.66
	8	0	15.33	6.71
15.6 g/L	1	0	12.24	5.36
	2	1	12.89	5.34
	3	0	12.86	5.38
	4	0	14.54	6.27
	5	0	16.36	6.53
	6	1	13.87	5.78
	7	0	13.59	5.69
	8	0	14.71	6
T0	1	1	12.33	5.15
	2	0	15.04	6.5
	3	0	13.14	4.98
	4	0	11.45	4.66
	5	1	12.87	4.99
	6	1	15.3	6.02
	7	0	16.54	6.68
	8	1	11.18	4.59
	9	0	14.25	5.78
	10	1	10.75	4.56

## Sheet: room temperature
Date Time, GMT+02:00	Temp, °C	RH, %				Temp, °C	RH, %
2019-01-11 08:12:00	25.222	10.8			Mean	25.2543	14.5708
2019-01-11 08:27:00	25.222	10.8			SD	0.118668	7.56534
2019-01-11 08:42:00	25.222	10.8			Min	24.931	0
2019-01-11 08:57:00	25.222	10.8			Max	25.805	32.3
2019-01-11 09:12:00	25.222	10.8
2019-01-11 09:27:00	25.222	10.8
2019-01-11 09:42:00	25.222	10.8
2019-01-11 09:57:00	25.125	10.8
2019-01-11 10:12:00	25.222	10.8
2019-01-11 10:27:00	25.222	10.8
2019-01-11 10:42:00	25.222	10.8
2019-01-11 10:57:00	25.222	10.8
2019-01-11 11:12:00	25.319	10.8
2019-01-11 11:27:00	25.319	10.8
2019-01-11 11:42:00	25.319	10.8
2019-01-11 11:57:00	25.319	10.8
2019-01-11 12:12:00	25.319	21.5
2019-01-11 12:27:00	25.319	21.5
2019-01-11 12:42:00	25.416	10.8
2019-01-11 12:57:00	25.319	10.8
2019-01-11 13:12:00	25.222	10.8
2019-01-11 13:27:00	25.222	10.8
2019-01-11 13:42:00	25.222	10.8
2019-01-11 13:57:00	25.125	10.8
2019-01-11 14:12:00	25.125	10.8
2019-01-11 14:27:00	25.125	10.8
2019-01-11 14:42:00	25.222	10.8
2019-01-11 14:57:00	25.222	0
2019-01-11 15:12:00	25.222	10.8
2019-01-11 15:27:00	25.222	10.8
2019-01-11 15:42:00	25.319	0
2019-01-11 15:57:00	25.222	10.8
2019-01-11 16:12:00	25.222	10.8
2019-01-11 16:27:00	25.125	0
2019-01-11 16:42:00	25.222	10.8
2019-01-11 16:57:00	25.222	10.8
2019-01-11 17:12:00	25.222	10.8
2019-01-11 17:27:00	25.222	0
2019-01-11 17:42:00	25.222	10.8
2019-01-11 17:57:00	25.125	10.8
2019-01-11 18:12:00	25.125	10.8
2019-01-11 18:27:00	25.125	10.8
2019-01-11 18:42:00	25.125	0
2019-01-11 18:57:00	25.125	0
2019-01-11 19:12:00	25.125	10.8
2019-01-11 19:27:00	25.125	0
2019-01-11 19:42:00	25.125	10.8
2019-01-11 19:57:00	25.222	10.8
2019-01-11 20:12:00	25.222	10.8
2019-01-11 20:27:00	25.125	10.8
2019-01-11 20:42:00	25.125	10.8
2019-01-11 20:57:00	25.125	10.8
2019-01-11 21:12:00	25.125	10.8
2019-01-11 21:27:00	25.222	10.8
2019-01-11 21:42:00	25.222	10.8
2019-01-11 21:57:00	25.222	0
2019-01-11 22:12:00	25.222	0
2019-01-11 22:27:00	25.222	0
2019-01-11 22:42:00	25.222	0
2019-01-11 22:57:00	25.222	0
2019-01-11 23:12:00	25.222	0
2019-01-11 23:27:00	25.222	0
2019-01-11 23:42:00	25.222	0
2019-01-11 23:57:00	25.222	0
2019-02-11 00:12:00	25.222	0
2019-02-11 00:27:00	25.222	0
2019-02-11 00:42:00	25.222	0
2019-02-11 00:57:00	25.222	0
2019-02-11 01:12:00	25.222	0
2019-02-11 01:27:00	25.222	0
2019-02-11 01:42:00	25.125	0
2019-02-11 01:57:00	25.222	0
2019-02-11 02:12:00	25.222	0
2019-02-11 02:27:00	25.222	0
2019-02-11 02:42:00	25.222	0
2019-02-11 02:57:00	25.222	0
2019-02-11 03:12:00	25.222	0
2019-02-11 03:27:00	25.222	0
2019-02-11 03:42:00	25.222	0
2019-02-11 03:57:00	25.222	0
2019-02-11 04:12:00	25.222	0
2019-02-11 04:27:00	25.222	0
2019-02-11 04:42:00	25.222	0
2019-02-11 04:57:00	25.222	0
2019-02-11 05:12:00	25.222	0
2019-02-11 05:27:00	25.222	0
2019-02-11 05:42:00	25.222	10.8
2019-02-11 05:57:00	25.222	0
2019-02-11 06:12:00	25.222	0
2019-02-11 06:27:00	25.222	0
2019-02-11 06:42:00	25.222	0
2019-02-11 06:57:00	25.222	0
2019-02-11 07:12:00	25.222	0
2019-02-11 07:27:00	25.222	0
2019-02-11 07:42:00	25.222	0
2019-02-11 07:57:00	25.222	0
2019-02-11 08:12:00	25.222	0
2019-02-11 08:27:00	25.222	0
2019-02-11 08:42:00	25.222	0
2019-02-11 08:57:00	25.222	0
2019-02-11 09:12:00	25.222	0
2019-02-11 09:27:00	25.222	0
2019-02-11 09:42:00	25.222	0
2019-02-11 09:57:00	25.222	0
2019-02-11 10:12:00	25.125	0
2019-02-11 10:27:00	25.222	21.5
2019-02-11 10:42:00	25.319	21.5
2019-02-11 10:57:00	25.416	32.3
2019-02-11 11:12:00	25.416	21.5
2019-02-11 11:27:00	25.416	21.5
2019-02-11 11:42:00	25.513	21.5
2019-02-11 11:57:00	25.513	21.5
2019-02-11 12:12:00	25.513	21.5
2019-02-11 12:27:00	25.513	21.5
2019-02-11 12:42:00	25.513	21.5
2019-02-11 12:57:00	25.513	21.5
2019-02-11 13:12:00	25.513	32.3
2019-02-11 13:27:00	25.513	21.5
2019-02-11 13:42:00	25.61	21.5
2019-02-11 13:57:00	25.61	32.3
2019-02-11 14:12:00	25.513	21.5
2019-02-11 14:27:00	25.513	21.5
2019-02-11 14:42:00	25.513	21.5
2019-02-11 14:57:00	25.513	21.5
2019-02-11 15:12:00	25.416	21.5
2019-02-11 15:27:00	25.416	21.5
2019-02-11 15:42:00	25.416	21.5
2019-02-11 15:57:00	25.416	21.5
2019-02-11 16:12:00	25.416	21.5
2019-02-11 16:27:00	25.416	21.5
2019-02-11 16:42:00	25.416	32.3
2019-02-11 16:57:00	25.416	32.3
2019-02-11 17:12:00	25.416	21.5
2019-02-11 17:27:00	25.416	21.5
2019-02-11 17:42:00	25.416	21.5
2019-02-11 17:57:00	25.416	21.5
2019-02-11 18:12:00	25.416	21.5
2019-02-11 18:27:00	25.416	21.5
2019-02-11 18:42:00	25.416	21.5
2019-02-11 18:57:00	25.416	21.5
2019-02-11 19:12:00	25.416	21.5
2019-02-11 19:27:00	25.416	21.5
2019-02-11 19:42:00	25.416	21.5
2019-02-11 19:57:00	25.416	21.5
2019-02-11 20:12:00	25.416	21.5
2019-02-11 20:27:00	25.416	21.5
2019-02-11 20:42:00	25.416	21.5
2019-02-11 20:57:00	25.416	21.5
2019-02-11 21:12:00	25.416	21.5
2019-02-11 21:27:00	25.416	21.5
2019-02-11 21:42:00	25.416	21.5
2019-02-11 21:57:00	25.416	21.5
2019-02-11 22:12:00	25.416	21.5
2019-02-11 22:27:00	25.416	21.5
2019-02-11 22:42:00	25.416	21.5
2019-02-11 22:57:00	25.416	21.5
2019-02-11 23:12:00	25.416	21.5
2019-02-11 23:27:00	25.416	21.5
2019-02-11 23:42:00	25.416	21.5
2019-02-11 23:57:00	25.416	21.5
2019-03-11 00:12:00	25.416	21.5
2019-03-11 00:27:00	25.416	21.5
2019-03-11 00:42:00	25.416	21.5
2019-03-11 00:57:00	25.319	21.5
2019-03-11 01:12:00	25.319	21.5
2019-03-11 01:27:00	25.319	21.5
2019-03-11 01:42:00	25.319	21.5
2019-03-11 01:57:00	25.319	21.5
2019-03-11 02:12:00	25.319	21.5
2019-03-11 02:27:00	25.319	21.5
2019-03-11 02:42:00	25.319	21.5
2019-03-11 02:57:00	25.319	21.5
2019-03-11 03:12:00	25.319	21.5
2019-03-11 03:27:00	25.319	21.5
2019-03-11 03:42:00	25.319	21.5
2019-03-11 03:57:00	25.319	21.5
2019-03-11 04:12:00	25.319	21.5
2019-03-11 04:27:00	25.319	21.5
2019-03-11 04:42:00	25.319	21.5
2019-03-11 04:57:00	25.319	21.5
2019-03-11 05:12:00	25.319	21.5
2019-03-11 05:27:00	25.319	21.5
2019-03-11 05:42:00	25.319	21.5
2019-03-11 05:57:00	25.319	21.5
2019-03-11 06:12:00	25.319	21.5
2019-03-11 06:27:00	25.319	21.5
2019-03-11 06:42:00	25.319	21.5
2019-03-11 06:57:00	25.319	21.5
2019-03-11 07:12:00	25.319	21.5
2019-03-11 07:27:00	25.319	21.5
2019-03-11 07:42:00	25.319	21.5
2019-03-11 07:57:00	25.319	21.5
2019-03-11 08:12:00	25.319	21.5
2019-03-11 08:27:00	25.319	21.5
2019-03-11 08:42:00	25.416	21.5
2019-03-11 08:57:00	25.416	21.5
2019-03-11 09:12:00	25.416	21.5
2019-03-11 09:27:00	25.416	21.5
2019-03-11 09:42:00	25.416	21.5
2019-03-11 09:57:00	25.416	21.5
2019-03-11 10:12:00	25.416	21.5
2019-03-11 10:27:00	25.416	21.5
2019-03-11 10:42:00	25.416	21.5
2019-03-11 10:57:00	25.513	21.5
2019-03-11 11:12:00	25.416	21.5
2019-03-11 11:27:00	25.416	21.5
2019-03-11 11:42:00	25.416	21.5
2019-03-11 11:57:00	25.416	21.5
2019-03-11 12:12:00	25.416	21.5
2019-03-11 12:27:00	25.416	21.5
2019-03-11 12:42:00	25.513	21.5
2019-03-11 12:57:00	25.416	21.5
2019-03-11 13:12:00	25.416	21.5
2019-03-11 13:27:00	25.416	21.5
2019-03-11 13:42:00	25.416	21.5
2019-03-11 13:57:00	25.416	21.5
2019-03-11 14:12:00	25.416	21.5
2019-03-11 14:27:00	25.416	21.5
2019-03-11 14:42:00	25.416	21.5
2019-03-11 14:57:00	25.416	21.5
2019-03-11 15:12:00	25.416	21.5
2019-03-11 15:27:00	25.416	21.5
2019-03-11 15:42:00	25.416	21.5
2019-03-11 15:57:00	25.416	21.5
2019-03-11 16:12:00	25.416	21.5
2019-03-11 16:27:00	25.416	21.5
2019-03-11 16:42:00	25.416	21.5
2019-03-11 16:57:00	25.416	21.5
2019-03-11 17:12:00	25.416	21.5
2019-03-11 17:27:00	25.416	21.5
2019-03-11 17:42:00	25.416	21.5
2019-03-11 17:57:00	25.416	21.5
2019-03-11 18:12:00	25.416	21.5
2019-03-11 18:27:00	25.416	21.5
2019-03-11 18:42:00	25.416	21.5
2019-03-11 18:57:00	25.416	21.5
2019-03-11 19:12:00	25.416	21.5
2019-03-11 19:27:00	25.416	21.5
2019-03-11 19:42:00	25.416	21.5
2019-03-11 19:57:00	25.416	21.5
2019-03-11 20:12:00	25.416	21.5
2019-03-11 20:27:00	25.416	21.5
2019-03-11 20:42:00	25.416	21.5
2019-03-11 20:57:00	25.416	21.5
2019-03-11 21:12:00	25.416	21.5
2019-03-11 21:27:00	25.416	21.5
2019-03-11 21:42:00	25.416	21.5
2019-03-11 21:57:00	25.416	21.5
2019-03-11 22:12:00	25.416	21.5
2019-03-11 22:27:00	25.416	21.5
2019-03-11 22:42:00	25.416	21.5
2019-03-11 22:57:00	25.416	21.5
2019-03-11 23:12:00	25.416	21.5
2019-03-11 23:27:00	25.416	21.5
2019-03-11 23:42:00	25.416	21.5
2019-03-11 23:57:00	25.416	21.5
2019-04-11 00:12:00	25.416	21.5
2019-04-11 00:27:00	25.416	21.5
2019-04-11 00:42:00	25.416	21.5
2019-04-11 00:57:00	25.416	21.5
2019-04-11 01:12:00	25.319	21.5
2019-04-11 01:27:00	25.319	21.5
2019-04-11 01:42:00	25.319	21.5
2019-04-11 01:57:00	25.319	21.5
2019-04-11 02:12:00	25.319	21.5
2019-04-11 02:27:00	25.319	21.5
2019-04-11 02:42:00	25.319	21.5
2019-04-11 02:57:00	25.319	21.5
2019-04-11 03:12:00	25.319	21.5
2019-04-11 03:27:00	25.319	21.5
2019-04-11 03:42:00	25.319	21.5
2019-04-11 03:57:00	25.319	21.5
2019-04-11 04:12:00	25.319	21.5
2019-04-11 04:27:00	25.319	21.5
2019-04-11 04:42:00	25.319	21.5
2019-04-11 04:57:00	25.319	21.5
2019-04-11 05:12:00	25.319	21.5
2019-04-11 05:27:00	25.319	21.5
2019-04-11 05:42:00	25.319	21.5
2019-04-11 05:57:00	25.319	21.5
2019-04-11 06:12:00	25.319	21.5
2019-04-11 06:27:00	25.319	21.5
2019-04-11 06:42:00	25.319	21.5
2019-04-11 06:57:00	25.319	21.5
2019-04-11 07:12:00	25.319	21.5
2019-04-11 07:27:00	25.319	21.5
2019-04-11 07:42:00	25.319	21.5
2019-04-11 07:57:00	25.319	21.5
2019-04-11 08:12:00	25.319	21.5
2019-04-11 08:27:00	25.319	21.5
2019-04-11 11:22:54	25.805	21.5
2019-04-11 11:37:54	25.513	21.5
2019-04-11 11:52:54	25.416	21.5
2019-04-11 12:07:54	25.513	21.5
2019-04-11 12:22:54	25.416	32.3
2019-04-11 12:37:54	25.416	32.3
2019-04-11 12:52:54	25.416	32.3
2019-04-11 13:07:54	25.416	32.3
2019-04-11 13:22:54	25.416	21.5
2019-04-11 13:37:54	25.416	21.5
2019-04-11 13:52:54	25.416	32.3
2019-04-11 14:07:54	25.416	32.3
2019-04-11 14:22:54	25.416	21.5
2019-04-11 14:37:54	25.416	21.5
2019-04-11 14:52:54	25.416	21.5
2019-04-11 15:07:54	25.416	32.3
2019-04-11 15:22:54	25.416	32.3
2019-04-11 15:37:54	25.513	32.3
2019-04-11 15:52:54	25.513	21.5
2019-04-11 16:07:54	25.416	32.3
2019-04-11 16:22:54	25.416	32.3
2019-04-11 16:37:54	25.416	32.3
2019-04-11 16:52:54	25.416	32.3
2019-04-11 17:07:54	25.416	32.3
2019-04-11 17:22:54	25.416	32.3
2019-04-11 17:37:54	25.416	32.3
2019-04-11 17:52:54	25.416	21.5
2019-04-11 18:07:54	25.416	32.3
2019-04-11 18:22:54	25.416	21.5
2019-04-11 18:37:54	25.416	32.3
2019-04-11 18:52:54	25.416	21.5
2019-04-11 19:07:54	25.416	32.3
2019-04-11 19:22:54	25.416	21.5
2019-04-11 19:37:54	25.416	21.5
2019-04-11 19:52:54	25.416	32.3
2019-04-11 20:07:54	25.416	32.3
2019-04-11 20:22:54	25.416	32.3
2019-04-11 20:37:54	25.416	32.3
2019-04-11 20:52:54	25.416	21.5
2019-04-11 21:07:54	25.416	21.5
2019-04-11 21:22:54	25.416	21.5
2019-04-11 21:37:54	25.416	21.5
2019-04-11 21:52:54	25.416	21.5
2019-04-11 22:07:54	25.416	21.5
2019-04-11 22:22:54	25.319	21.5
2019-04-11 22:37:54	25.319	21.5
2019-04-11 22:52:54	25.319	21.5
2019-04-11 23:07:54	25.319	21.5
2019-04-11 23:22:54	25.319	21.5
2019-04-11 23:37:54	25.319	21.5
2019-04-11 23:52:54	25.319	21.5
2019-05-11 00:07:54	25.319	21.5
2019-05-11 00:22:54	25.319	21.5
2019-05-11 00:37:54	25.319	21.5
2019-05-11 00:52:54	25.319	21.5
2019-05-11 01:07:54	25.319	21.5
2019-05-11 01:22:54	25.319	21.5
2019-05-11 01:37:54	25.319	21.5
2019-05-11 01:52:54	25.319	21.5
2019-05-11 02:07:54	25.319	21.5
2019-05-11 02:22:54	25.319	21.5
2019-05-11 02:37:54	25.319	21.5
2019-05-11 02:52:54	25.319	21.5
2019-05-11 03:07:54	25.319	21.5
2019-05-11 03:22:54	25.319	21.5
2019-05-11 03:37:54	25.319	21.5
2019-05-11 03:52:54	25.319	21.5
2019-05-11 04:07:54	25.319	21.5
2019-05-11 04:22:54	25.319	21.5
2019-05-11 04:37:54	25.319	21.5
2019-05-11 04:52:54	25.319	32.3
2019-05-11 05:07:54	25.319	32.3
2019-05-11 05:22:54	25.319	32.3
2019-05-11 05:37:54	25.319	32.3
2019-05-11 05:52:54	25.319	32.3
2019-05-11 06:07:54	25.319	32.3
2019-05-11 06:22:54	25.319	32.3
2019-05-11 06:37:54	25.319	32.3
2019-05-11 06:52:54	25.319	32.3
2019-05-11 07:07:54	25.319	32.3
2019-05-11 07:22:54	25.319	32.3
2019-05-11 07:37:54	25.319	21.5
2019-05-11 07:52:54	25.319	32.3
2019-05-11 08:07:54	25.319	21.5
2019-05-11 08:22:54	25.319	32.3
2019-05-11 08:37:54	25.319	32.3
2019-05-11 08:52:54	25.319	32.3
2019-05-11 09:07:54	25.319	21.5
2019-05-11 09:22:54	25.319	32.3
2019-05-11 09:37:54	25.319	32.3
2019-05-11 09:52:54	25.319	10.8
2019-05-11 10:07:54	25.319	10.8
2019-05-11 10:22:54	25.319	10.8
2019-05-11 10:37:54	25.222	10.8
2019-05-11 10:52:54	25.222	10.8
2019-05-11 11:07:54	25.319	10.8
2019-05-11 11:22:54	25.319	21.5
2019-05-11 11:37:54	25.319	10.8
2019-05-11 11:52:54	25.416	10.8
2019-05-11 12:07:54	25.416	10.8
2019-05-11 12:22:54	25.319	10.8
2019-05-11 12:37:54	25.319	10.8
2019-05-11 12:52:54	25.222	10.8
2019-05-11 13:07:54	25.222	10.8
2019-05-11 13:22:54	25.222	10.8
2019-05-11 13:37:54	25.222	10.8
2019-05-11 13:52:54	25.222	10.8
2019-05-11 14:07:54	25.222	10.8
2019-05-11 14:22:54	25.222	10.8
2019-05-11 14:37:54	25.222	10.8
2019-05-11 14:52:54	25.222	10.8
2019-05-11 15:07:54	25.222	10.8
2019-05-11 15:22:54	25.222	10.8
2019-05-11 15:37:54	25.222	10.8
2019-05-11 15:52:54	25.222	10.8
2019-05-11 16:07:54	25.222	10.8
2019-05-11 16:22:54	25.222	10.8
2019-05-11 16:37:54	25.222	10.8
2019-05-11 16:52:54	25.222	10.8
2019-05-11 17:07:54	25.222	10.8
2019-05-11 17:22:54	25.222	10.8
2019-05-11 17:37:54	25.222	10.8
2019-05-11 17:52:54	25.319	10.8
2019-05-11 18:07:54	25.319	10.8
2019-05-11 18:22:54	25.319	10.8
2019-05-11 18:37:54	25.319	10.8
2019-05-11 18:52:54	25.319	10.8
2019-05-11 19:07:54	25.319	10.8
2019-05-11 19:22:54	25.319	10.8
2019-05-11 19:37:54	25.319	10.8
2019-05-11 19:52:54	25.319	10.8
2019-05-11 20:07:54	25.222	10.8
2019-05-11 20:22:54	25.319	10.8
2019-05-11 20:37:54	25.319	10.8
2019-05-11 20:52:54	25.319	10.8
2019-05-11 21:07:54	25.319	10.8
2019-05-11 21:22:54	25.319	10.8
2019-05-11 21:37:54	25.319	10.8
2019-05-11 21:52:54	25.319	10.8
2019-05-11 22:07:54	25.319	10.8
2019-05-11 22:22:54	25.319	10.8
2019-05-11 22:37:54	25.319	10.8
2019-05-11 22:52:54	25.319	10.8
2019-05-11 23:07:54	25.319	10.8
2019-05-11 23:22:54	25.319	10.8
2019-05-11 23:37:54	25.319	10.8
2019-05-11 23:52:54	25.222	10.8
2019-06-11 00:07:54	25.222	10.8
2019-06-11 00:22:54	25.222	10.8
2019-06-11 00:37:54	25.222	10.8
2019-06-11 00:52:54	25.222	10.8
2019-06-11 01:07:54	25.319	10.8
2019-06-11 01:22:54	25.222	10.8
2019-06-11 01:37:54	25.319	10.8
2019-06-11 01:52:54	25.319	10.8
2019-06-11 02:07:54	25.222	10.8
2019-06-11 02:22:54	25.319	10.8
2019-06-11 02:37:54	25.319	10.8
2019-06-11 02:52:54	25.319	10.8
2019-06-11 03:07:54	25.319	10.8
2019-06-11 03:22:54	25.319	10.8
2019-06-11 03:37:54	25.319	10.8
2019-06-11 03:52:54	25.319	10.8
2019-06-11 04:07:54	25.319	10.8
2019-06-11 04:22:54	25.319	10.8
2019-06-11 04:37:54	25.319	10.8
2019-06-11 04:52:54	25.319	10.8
2019-06-11 05:07:54	25.319	10.8
2019-06-11 05:22:54	25.319	10.8
2019-06-11 05:37:54	25.319	10.8
2019-06-11 05:52:54	25.319	10.8
2019-06-11 06:07:54	25.319	10.8
2019-06-11 06:22:54	25.319	10.8
2019-06-11 06:37:54	25.319	10.8
2019-06-11 06:52:54	25.319	10.8
2019-06-11 07:07:54	25.319	10.8
2019-06-11 07:22:54	25.319	10.8
2019-06-11 07:37:54	25.319	10.8
2019-06-11 07:52:54	25.319	10.8
2019-06-11 08:07:54	25.319	10.8
2019-06-11 08:22:54	25.319	10.8
2019-06-11 08:37:54	25.319	10.8
2019-06-11 08:52:54	25.319	10.8
2019-06-11 09:07:54	25.319	10.8
2019-06-11 09:22:54	25.319	10.8
2019-06-11 09:37:54	25.319	10.8
2019-06-11 09:52:54	25.319	10.8
2019-06-11 10:07:54	25.319	10.8
2019-06-11 10:22:54	25.319	10.8
2019-06-11 10:37:54	25.319	10.8
2019-06-11 10:52:54	25.319	10.8
2019-06-11 11:07:54	25.319	10.8
2019-06-11 11:22:54	25.319	10.8
2019-06-11 11:37:54	25.222	10.8
2019-06-11 11:52:54	25.222	10.8
2019-06-11 12:07:54	25.222	10.8
2019-06-11 12:22:54	25.222	10.8
2019-06-11 12:37:54	25.222	10.8
2019-06-11 12:52:54	25.222	10.8
2019-06-11 13:07:54	25.222	10.8
2019-06-11 13:22:54	25.416	21.5
2019-06-11 13:37:54	25.416	10.8
2019-06-11 13:52:54	25.416	21.5
2019-06-11 14:07:54	25.416	10.8
2019-06-11 14:22:54	25.319	21.5
2019-06-11 14:37:54	25.222	10.8
2019-06-11 14:52:54	25.222	21.5
2019-06-11 15:07:54	25.125	10.8
2019-06-11 15:22:54	25.125	10.8
2019-06-11 15:37:54	25.125	10.8
2019-06-11 15:52:54	25.222	10.8
2019-06-11 16:07:54	25.222	10.8
2019-06-11 16:22:54	25.222	10.8
2019-06-11 16:37:54	25.222	10.8
2019-06-11 16:52:54	25.222	10.8
2019-06-11 17:07:54	25.222	10.8
2019-06-11 17:22:54	25.222	10.8
2019-06-11 17:37:54	25.222	10.8
2019-06-11 17:52:54	25.222	10.8
2019-06-11 18:07:54	25.222	10.8
2019-06-11 18:22:54	25.222	10.8
2019-06-11 18:37:54	25.222	10.8
2019-06-11 18:52:54	25.222	10.8
2019-06-11 19:07:54	25.222	10.8
2019-06-11 19:22:54	25.319	10.8
2019-06-11 19:37:54	25.319	10.8
2019-06-11 19:52:54	25.319	10.8
2019-06-11 20:07:54	25.319	10.8
2019-06-11 20:22:54	25.319	10.8
2019-06-11 20:37:54	25.319	10.8
2019-06-11 20:52:54	25.319	10.8
2019-06-11 21:07:54	25.319	10.8
2019-06-11 21:22:54	25.319	10.8
2019-06-11 21:37:54	25.319	10.8
2019-06-11 21:52:54	25.319	10.8
2019-06-11 22:07:54	25.319	10.8
2019-06-11 22:22:54	25.319	10.8
2019-06-11 22:37:54	25.319	10.8
2019-06-11 22:52:54	25.319	10.8
2019-06-11 23:07:54	25.319	10.8
2019-06-11 23:22:54	25.319	10.8
2019-06-11 23:37:54	25.319	10.8
2019-06-11 23:52:54	25.319	10.8
2019-07-11 00:07:54	25.319	10.8
2019-07-11 00:22:54	25.319	10.8
2019-07-11 00:37:54	25.319	10.8
2019-07-11 00:52:54	25.319	10.8
2019-07-11 01:07:54	25.319	10.8
2019-07-11 01:22:54	25.319	10.8
2019-07-11 01:37:54	25.319	10.8
2019-07-11 01:52:54	25.319	10.8
2019-07-11 02:07:54	25.319	10.8
2019-07-11 02:22:54	25.319	10.8
2019-07-11 02:37:54	25.319	10.8
2019-07-11 02:52:54	25.319	10.8
2019-07-11 03:07:54	25.319	10.8
2019-07-11 03:22:54	25.319	10.8
2019-07-11 03:37:54	25.319	10.8
2019-07-11 03:52:54	25.319	10.8
2019-07-11 04:07:54	25.319	10.8
2019-07-11 04:22:54	25.319	10.8
2019-07-11 04:37:54	25.319	10.8
2019-07-11 04:52:54	25.319	10.8
2019-07-11 05:07:54	25.319	10.8
2019-07-11 05:22:54	25.319	10.8
2019-07-11 05:37:54	25.319	10.8
2019-07-11 05:52:54	25.319	10.8
2019-07-11 06:07:54	25.319	10.8
2019-07-11 06:22:54	25.319	10.8
2019-07-11 06:37:54	25.319	10.8
2019-07-11 06:52:54	25.319	10.8
2019-07-11 07:07:54	25.319	10.8
2019-07-11 07:22:54	25.319	10.8
2019-07-11 07:37:54	25.319	10.8
2019-07-11 07:52:54	25.319	10.8
2019-07-11 08:07:54	25.319	10.8
2019-07-11 08:22:54	25.319	10.8
2019-07-11 08:37:54	25.319	10.8
2019-07-11 08:52:54	25.319	10.8
2019-07-11 09:07:54	25.319	10.8
2019-07-11 09:22:54	25.319	10.8
2019-07-11 09:37:54	25.319	10.8
2019-07-11 09:52:54	25.416	10.8
2019-07-11 10:07:54	25.416	10.8
2019-07-11 10:22:54	25.319	10.8
2019-07-11 10:37:54	25.319	10.8
2019-07-11 10:52:54	25.319	10.8
2019-07-11 11:07:54	25.319	10.8
2019-07-11 11:22:54	25.319	10.8
2019-07-11 11:37:54	25.416	10.8
2019-07-11 11:52:54	25.319	10.8
2019-07-11 12:07:54	25.319	10.8
2019-07-11 12:22:54	25.319	10.8
2019-07-11 12:37:54	25.319	10.8
2019-07-11 12:52:54	25.319	10.8
2019-07-11 13:07:54	25.416	10.8
2019-07-11 13:22:54	25.416	10.8
2019-07-11 13:37:54	25.416	10.8
2019-07-11 13:52:54	25.416	10.8
2019-07-11 14:07:54	25.416	10.8
2019-07-11 14:22:54	25.319	10.8
2019-07-11 14:37:54	25.319	10.8
2019-07-11 14:52:54	25.319	10.8
2019-07-11 15:07:54	25.319	10.8
2019-07-11 15:22:54	25.319	10.8
2019-07-11 15:37:54	25.319	10.8
2019-07-11 15:52:54	25.319	10.8
2019-07-11 16:07:54	25.319	10.8
2019-07-11 16:22:54	25.319	10.8
2019-07-11 16:37:54	25.319	10.8
2019-07-11 16:52:54	25.319	10.8
2019-07-11 17:07:54	25.319	10.8
2019-07-11 17:22:54	25.319	10.8
2019-07-11 17:37:54	25.319	10.8
2019-07-11 17:52:54	25.319	10.8
2019-07-11 18:07:54	25.319	10.8
2019-07-11 18:22:54	25.416	10.8
2019-07-11 18:37:54	25.416	10.8
2019-07-11 18:52:54	25.319	10.8
2019-07-11 19:07:54	25.319	10.8
2019-07-11 19:22:54	25.319	10.8
2019-07-11 19:37:54	25.319	10.8
2019-07-11 19:52:54	25.319	10.8
2019-07-11 20:07:54	25.319	10.8
2019-07-11 20:22:54	25.319	10.8
2019-07-11 20:37:54	25.319	10.8
2019-07-11 20:52:54	25.319	10.8
2019-07-11 21:07:54	25.319	10.8
2019-07-11 21:22:54	25.319	10.8
2019-07-11 21:37:54	25.319	10.8
2019-07-11 21:52:54	25.319	10.8
2019-07-11 22:07:54	25.319	10.8
2019-07-11 22:22:54	25.416	10.8
2019-07-11 22:37:54	25.416	10.8
2019-07-11 22:52:54	25.416	10.8
2019-07-11 23:07:54	25.416	10.8
2019-07-11 23:22:54	25.416	10.8
2019-07-11 23:37:54	25.319	10.8
2019-07-11 23:52:54	25.416	10.8
2019-08-11 00:07:54	25.416	10.8
2019-08-11 00:22:54	25.416	10.8
2019-08-11 00:37:54	25.416	10.8
2019-08-11 00:52:54	25.319	10.8
2019-08-11 01:07:54	25.319	10.8
2019-08-11 01:22:54	25.319	10.8
2019-08-11 01:37:54	25.319	10.8
2019-08-11 01:52:54	25.319	10.8
2019-08-11 02:07:54	25.319	10.8
2019-08-11 02:22:54	25.319	10.8
2019-08-11 02:37:54	25.319	10.8
2019-08-11 02:52:54	25.319	10.8
2019-08-11 03:07:54	25.319	10.8
2019-08-11 03:22:54	25.319	10.8
2019-08-11 03:37:54	25.319	10.8
2019-08-11 03:52:54	25.319	10.8
2019-08-11 04:07:54	25.319	10.8
2019-08-11 04:22:54	25.319	10.8
2019-08-11 04:37:54	25.416	10.8
2019-08-11 04:52:54	25.416	10.8
2019-08-11 05:07:54	25.416	10.8
2019-08-11 05:22:54	25.416	10.8
2019-08-11 05:37:54	25.416	10.8
2019-08-11 05:52:54	25.416	10.8
2019-08-11 06:07:54	25.416	10.8
2019-08-11 06:22:54	25.319	10.8
2019-08-11 06:37:54	25.319	10.8
2019-08-11 06:52:54	25.319	10.8
2019-08-11 07:07:54	25.319	10.8
2019-08-11 07:22:54	25.319	10.8
2019-08-11 07:37:54	25.319	10.8
2019-08-11 07:52:54	25.319	10.8
2019-08-11 08:07:54	25.319	10.8
2019-08-11 08:22:54	25.319	10.8
2019-08-11 08:37:54	25.319	10.8
2019-08-11 08:52:54	25.319	10.8
2019-08-11 09:07:54	25.319	10.8
2019-08-11 09:22:54	25.319	32.3
2019-08-11 09:37:54	25.416	32.3
2019-08-11 09:52:54	25.416	21.5
2019-08-11 10:07:54	25.416	32.3
2019-08-11 10:22:54	25.513	32.3
2019-08-11 10:37:54	25.513	32.3
2019-08-11 10:52:54	25.513	32.3
2019-08-11 11:07:54	25.513	32.3
2019-08-11 11:22:54	25.513	32.3
2019-08-11 11:37:54	25.513	21.5
2019-08-11 11:52:54	25.513	32.3
2019-08-11 12:07:54	25.513	32.3
2019-08-11 12:22:54	25.513	32.3
2019-08-11 12:37:54	25.513	32.3
2019-08-11 12:52:54	25.513	32.3
2019-08-11 13:07:54	25.513	32.3
2019-08-11 13:22:54	25.416	32.3
2019-08-11 13:37:54	25.416	32.3
2019-08-11 13:52:54	25.416	32.3
2019-08-11 14:07:54	25.416	21.5
2019-08-11 14:22:54	25.416	32.3
2019-08-11 14:37:54	25.416	32.3
2019-08-11 14:52:54	25.513	32.3
2019-08-11 15:07:54	25.513	32.3
2019-08-11 15:22:54	25.513	32.3
2019-08-11 15:37:54	25.416	21.5
2019-08-11 15:52:54	25.416	32.3
2019-08-11 16:07:54	25.416	32.3
2019-08-11 16:22:54	25.416	32.3
2019-08-11 16:37:54	25.416	32.3
2019-08-11 16:52:54	25.416	32.3
2019-08-11 17:07:54	25.416	32.3
2019-08-11 17:22:54	25.416	32.3
2019-08-11 17:37:54	25.416	32.3
2019-08-11 17:52:54	25.416	32.3
2019-08-11 18:07:54	25.416	32.3
2019-08-11 18:22:54	25.416	32.3
2019-08-11 18:37:54	25.416	32.3
2019-08-11 18:52:54	25.416	32.3
2019-08-11 19:07:54	25.319	32.3
2019-08-11 19:22:54	25.319	32.3
2019-08-11 19:37:54	25.319	32.3
2019-08-11 19:52:54	25.416	32.3
2019-08-11 20:07:54	25.416	32.3
2019-08-11 20:22:54	25.416	32.3
2019-08-11 20:37:54	25.319	32.3
2019-08-11 20:52:54	25.319	21.5
2019-08-11 21:07:54	25.416	21.5
2019-08-11 21:22:54	25.319	21.5
2019-08-11 21:37:54	25.416	21.5
2019-08-11 21:52:54	25.416	21.5
2019-08-11 22:07:54	25.416	21.5
2019-08-11 22:22:54	25.416	21.5
2019-08-11 22:37:54	25.416	32.3
2019-08-11 22:52:54	25.416	21.5
2019-08-11 23:07:54	25.416	21.5
2019-08-11 23:22:54	25.416	21.5
2019-08-11 23:37:54	25.416	21.5
2019-08-11 23:52:54	25.416	21.5
2019-09-11 00:07:54	25.319	21.5
2019-09-11 00:22:54	25.416	32.3
2019-09-11 00:37:54	25.319	21.5
2019-09-11 00:52:54	25.416	21.5
2019-09-11 01:07:54	25.416	32.3
2019-09-11 01:22:54	25.416	21.5
2019-09-11 01:37:54	25.319	32.3
2019-09-11 01:52:54	25.319	21.5
2019-09-11 02:07:54	25.319	21.5
2019-09-11 02:22:54	25.319	21.5
2019-09-11 02:37:54	25.319	21.5
2019-09-11 02:52:54	25.319	21.5
2019-09-11 03:07:54	25.319	21.5
2019-09-11 03:22:54	25.319	21.5
2019-09-11 03:37:54	25.319	21.5
2019-09-11 03:52:54	25.319	21.5
2019-09-11 04:07:54	25.319	21.5
2019-09-11 04:22:54	25.319	32.3
2019-09-11 04:37:54	25.319	21.5
2019-09-11 04:52:54	25.319	32.3
2019-09-11 05:07:54	25.319	32.3
2019-09-11 05:22:54	25.319	32.3
2019-09-11 05:37:54	25.319	32.3
2019-09-11 05:52:54	25.319	32.3
2019-09-11 06:07:54	25.319	32.3
2019-09-11 06:22:54	25.319	32.3
2019-09-11 06:37:54	25.319	32.3
2019-09-11 06:52:54	25.319	32.3
2019-09-11 07:07:54	25.319	32.3
2019-09-11 07:22:54	25.319	32.3
2019-09-11 07:37:54	25.319	32.3
2019-09-11 07:52:54	25.319	32.3
2019-09-11 08:07:54	25.319	32.3
2019-09-11 08:22:54	25.319	32.3
2019-09-11 08:37:54	25.319	32.3
2019-09-11 08:52:54	25.319	32.3
2019-09-11 09:07:54	25.319	32.3
2019-09-11 09:22:54	25.222	10.8
2019-09-11 09:37:54	25.222	10.8
2019-09-11 09:52:54	25.222	10.8
2019-09-11 10:07:54	25.222	10.8
2019-09-11 10:22:54	25.222	10.8
2019-09-11 10:37:54	25.222	21.5
2019-09-11 10:52:54	25.319	10.8
2019-09-11 11:07:54	25.222	10.8
2019-09-11 11:22:54	25.319	10.8
2019-09-11 11:37:54	25.319	10.8
2019-09-11 11:52:54	25.222	10.8
2019-09-11 12:07:54	25.222	10.8
2019-09-11 12:22:54	25.222	10.8
2019-09-11 12:37:54	25.222	10.8
2019-09-11 12:52:54	25.222	10.8
2019-09-11 13:07:54	25.222	10.8
2019-09-11 13:22:54	25.125	10.8
2019-09-11 13:37:54	25.125	10.8
2019-09-11 13:52:54	25.125	10.8
2019-09-11 14:07:54	25.125	10.8
2019-09-11 14:22:54	25.125	10.8
2019-09-11 14:37:54	25.125	10.8
2019-09-11 14:52:54	25.125	10.8
2019-09-11 15:07:54	25.125	10.8
2019-09-11 15:22:54	25.125	10.8
2019-09-11 15:37:54	25.125	10.8
2019-09-11 15:52:54	25.125	10.8
2019-09-11 16:07:54	25.125	10.8
2019-09-11 16:22:54	25.222	10.8
2019-09-11 16:37:54	25.222	10.8
2019-09-11 16:52:54	25.222	10.8
2019-09-11 17:07:54	25.222	10.8
2019-09-11 17:22:54	25.222	10.8
2019-09-11 17:37:54	25.222	10.8
2019-09-11 17:52:54	25.222	10.8
2019-09-11 18:07:54	25.222	10.8
2019-09-11 18:22:54	25.222	10.8
2019-09-11 18:37:54	25.222	10.8
2019-09-11 18:52:54	25.222	10.8
2019-09-11 19:07:54	25.222	10.8
2019-09-11 19:22:54	25.222	10.8
2019-09-11 19:37:54	25.222	10.8
2019-09-11 19:52:54	25.222	10.8
2019-09-11 20:07:54	25.222	10.8
2019-09-11 20:22:54	25.222	10.8
2019-09-11 20:37:54	25.222	10.8
2019-09-11 20:52:54	25.222	10.8
2019-09-11 21:07:54	25.222	10.8
2019-09-11 21:22:54	25.222	10.8
2019-09-11 21:37:54	25.222	10.8
2019-09-11 21:52:54	25.222	10.8
2019-09-11 22:07:54	25.222	10.8
2019-09-11 22:22:54	25.222	10.8
2019-09-11 22:37:54	25.222	10.8
2019-09-11 22:52:54	25.222	10.8
2019-09-11 23:07:54	25.222	10.8
2019-09-11 23:22:54	25.222	10.8
2019-09-11 23:37:54	25.222	10.8
2019-09-11 23:52:54	25.222	10.8
2019-10-11 00:07:54	25.222	10.8
2019-10-11 00:22:54	25.222	10.8
2019-10-11 00:37:54	25.222	10.8
2019-10-11 00:52:54	25.222	10.8
2019-10-11 01:07:54	25.222	10.8
2019-10-11 01:22:54	25.222	10.8
2019-10-11 01:37:54	25.222	10.8
2019-10-11 01:52:54	25.222	10.8
2019-10-11 02:07:54	25.222	10.8
2019-10-11 02:22:54	25.222	10.8
2019-10-11 02:37:54	25.222	10.8
2019-10-11 02:52:54	25.222	10.8
2019-10-11 03:07:54	25.222	10.8
2019-10-11 03:22:54	25.222	10.8
2019-10-11 03:37:54	25.222	10.8
2019-10-11 03:52:54	25.222	10.8
2019-10-11 04:07:54	25.222	10.8
2019-10-11 04:22:54	25.125	10.8
2019-10-11 04:37:54	25.222	10.8
2019-10-11 04:52:54	25.125	10.8
2019-10-11 05:07:54	25.222	10.8
2019-10-11 05:22:54	25.125	10.8
2019-10-11 05:37:54	25.125	10.8
2019-10-11 05:52:54	25.125	10.8
2019-10-11 06:07:54	25.125	10.8
2019-10-11 06:22:54	25.125	10.8
2019-10-11 06:37:54	25.125	10.8
2019-10-11 06:52:54	25.125	10.8
2019-10-11 07:07:54	25.125	10.8
2019-10-11 07:22:54	25.125	10.8
2019-10-11 07:37:54	25.125	10.8
2019-10-11 07:52:54	25.125	10.8
2019-10-11 08:07:54	25.125	10.8
2019-10-11 08:22:54	25.125	10.8
2019-10-11 08:37:54	25.125	10.8
2019-10-11 08:52:54	25.125	10.8
2019-10-11 09:07:54	25.125	10.8
2019-10-11 09:22:54	25.125	21.5
2019-10-11 09:37:54	25.125	10.8
2019-10-11 09:52:54	25.125	10.8
2019-10-11 10:07:54	25.125	10.8
2019-10-11 10:22:54	25.125	10.8
2019-10-11 10:37:54	25.125	10.8
2019-10-11 10:52:54	25.125	10.8
2019-10-11 11:07:54	25.125	10.8
2019-10-11 11:22:54	25.125	10.8
2019-10-11 11:37:54	25.125	10.8
2019-10-11 11:52:54	25.125	10.8
2019-10-11 12:07:54	25.125	10.8
2019-10-11 12:22:54	25.125	10.8
2019-10-11 12:37:54	25.125	10.8
2019-10-11 12:52:54	25.125	10.8
2019-10-11 13:07:54	25.125	10.8
2019-10-11 13:22:54	25.028	10.8
2019-10-11 13:37:54	25.028	10.8
2019-10-11 13:52:54	25.028	10.8
2019-10-11 14:07:54	25.125	10.8
2019-10-11 14:22:54	25.222	10.8
2019-10-11 14:37:54	25.222	10.8
2019-10-11 14:52:54	25.125	10.8
2019-10-11 15:07:54	25.125	10.8
2019-10-11 15:22:54	25.125	10.8
2019-10-11 15:37:54	25.125	10.8
2019-10-11 15:52:54	25.125	10.8
2019-10-11 16:07:54	25.125	10.8
2019-10-11 16:22:54	25.125	10.8
2019-10-11 16:37:54	25.125	10.8
2019-10-11 16:52:54	25.125	10.8
2019-10-11 17:07:54	25.125	10.8
2019-10-11 17:22:54	25.125	10.8
2019-10-11 17:37:54	25.125	10.8
2019-10-11 17:52:54	25.125	10.8
2019-10-11 18:07:54	25.125	10.8
2019-10-11 18:22:54	25.125	10.8
2019-10-11 18:37:54	25.125	10.8
2019-10-11 18:52:54	25.125	10.8
2019-10-11 19:07:54	25.125	10.8
2019-10-11 19:22:54	25.125	10.8
2019-10-11 19:37:54	25.125	10.8
2019-10-11 19:52:54	25.125	10.8
2019-10-11 20:07:54	25.125	10.8
2019-10-11 20:22:54	25.125	10.8
2019-10-11 20:37:54	25.125	10.8
2019-10-11 20:52:54	25.222	10.8
2019-10-11 21:07:54	25.222	10.8
2019-10-11 21:22:54	25.222	10.8
2019-10-11 21:37:54	25.222	10.8
2019-10-11 21:52:54	25.222	10.8
2019-10-11 22:07:54	25.222	10.8
2019-10-11 22:22:54	25.222	10.8
2019-10-11 22:37:54	25.125	10.8
2019-10-11 22:52:54	25.125	10.8
2019-10-11 23:07:54	25.125	10.8
2019-10-11 23:22:54	25.125	10.8
2019-10-11 23:37:54	25.125	10.8
2019-10-11 23:52:54	25.125	10.8
2019-11-11 00:07:54	25.125	10.8
2019-11-11 00:22:54	25.125	10.8
2019-11-11 00:37:54	25.125	10.8
2019-11-11 00:52:54	25.125	10.8
2019-11-11 01:07:54	25.125	10.8
2019-11-11 01:22:54	25.125	10.8
2019-11-11 01:37:54	25.125	10.8
2019-11-11 01:52:54	25.222	10.8
2019-11-11 02:07:54	25.222	10.8
2019-11-11 02:22:54	25.222	10.8
2019-11-11 02:37:54	25.222	10.8
2019-11-11 02:52:54	25.222	10.8
2019-11-11 03:07:54	25.222	10.8
2019-11-11 03:22:54	25.222	10.8
2019-11-11 03:37:54	25.125	10.8
2019-11-11 03:52:54	25.125	10.8
2019-11-11 04:07:54	25.222	10.8
2019-11-11 04:22:54	25.222	10.8
2019-11-11 04:37:54	25.222	10.8
2019-11-11 04:52:54	25.125	10.8
2019-11-11 05:07:54	25.125	10.8
2019-11-11 05:22:54	25.125	10.8
2019-11-11 05:37:54	25.125	10.8
2019-11-11 05:52:54	25.125	10.8
2019-11-11 06:07:54	25.125	10.8
2019-11-11 06:22:54	25.125	10.8
2019-11-11 06:37:54	25.125	10.8
2019-11-11 06:52:54	25.125	10.8
2019-11-11 07:07:54	25.125	10.8
2019-11-11 07:22:54	25.125	10.8
2019-11-11 07:37:54	24.931	10.8
2019-11-11 07:52:54	24.931	10.8
2019-11-11 08:07:54	24.931	10.8
2019-11-11 08:22:54	24.931	10.8
2019-11-11 08:37:54	24.931	10.8
2019-11-11 08:52:54	24.931	10.8
2019-11-11 09:07:54	25.125	10.8
2019-11-11 09:22:54	25.222	10.8
2019-11-11 09:37:54	25.319	10.8
2019-11-11 09:52:54	25.222	10.8
2019-11-11 10:07:54	25.222	10.8
2019-11-11 10:22:54	25.125	10.8
2019-11-11 10:37:54	25.125	10.8
2019-11-11 10:52:54	25.125	10.8
2019-11-11 11:07:54	25.125	10.8
2019-11-11 11:22:54	25.125	10.8
2019-11-11 11:37:54	25.125	10.8
2019-11-11 11:52:54	25.125	10.8
2019-11-11 12:07:54	25.125	10.8
2019-11-11 12:22:54	25.125	10.8
2019-11-11 12:37:54	25.125	10.8
2019-11-11 12:52:54	25.125	10.8
2019-11-11 13:07:54	25.125	10.8
2019-11-11 13:22:54	25.125	10.8
2019-11-11 13:37:54	25.125	10.8
2019-11-11 13:52:54	25.222	10.8
2019-11-11 14:07:54	25.125	10.8
2019-11-11 14:22:54	25.125	10.8
2019-11-11 14:37:54	25.125	10.8
2019-11-11 14:52:54	25.125	10.8
2019-11-11 15:07:54	25.125	10.8
2019-11-11 15:22:54	25.125	10.8
2019-11-11 15:37:54	25.125	10.8
2019-11-11 15:52:54	25.125	10.8
2019-11-11 16:07:54	25.125	10.8
2019-11-11 16:22:54	25.125	10.8
2019-11-11 16:37:54	25.125	10.8
2019-11-11 16:52:54	25.125	10.8
2019-11-11 17:07:54	25.125	10.8
2019-11-11 17:22:54	25.125	10.8
2019-11-11 17:37:54	25.125	10.8
2019-11-11 17:52:54	25.125	10.8
2019-11-11 18:07:54	25.125	10.8
2019-11-11 18:22:54	25.125	10.8
2019-11-11 18:37:54	25.125	10.8
2019-11-11 18:52:54	25.125	10.8
2019-11-11 19:07:54	25.125	10.8
2019-11-11 19:22:54	25.125	10.8
2019-11-11 19:37:54	25.125	10.8
2019-11-11 19:52:54	25.125	10.8
2019-11-11 20:07:54	25.125	10.8
2019-11-11 20:22:54	25.125	10.8
2019-11-11 20:37:54	25.125	10.8
2019-11-11 20:52:54	25.125	10.8
2019-11-11 21:07:54	25.125	10.8
2019-11-11 21:22:54	25.125	10.8
2019-11-11 21:37:54	25.125	10.8
2019-11-11 21:52:54	25.125	10.8
2019-11-11 22:07:54	25.125	10.8
2019-11-11 22:22:54	25.125	10.8
2019-11-11 22:37:54	25.125	10.8
2019-11-11 22:52:54	25.125	10.8
2019-11-11 23:07:54	25.125	10.8
2019-11-11 23:22:54	25.125	10.8
2019-11-11 23:37:54	25.125	10.8
2019-11-11 23:52:54	25.125	10.8
2019-12-11 00:07:54	25.125	10.8
2019-12-11 00:22:54	25.125	10.8
2019-12-11 00:37:54	25.125	10.8
2019-12-11 00:52:54	25.125	10.8
2019-12-11 01:07:54	25.125	10.8
2019-12-11 01:22:54	25.125	10.8
2019-12-11 01:37:54	25.125	10.8
2019-12-11 01:52:54	25.125	10.8
2019-12-11 02:07:54	25.125	10.8
2019-12-11 02:22:54	25.125	10.8
2019-12-11 02:37:54	25.125	10.8
2019-12-11 02:52:54	25.125	10.8
2019-12-11 03:07:54	25.125	10.8
2019-12-11 03:22:54	25.125	10.8
2019-12-11 03:37:54	25.125	10.8
2019-12-11 03:52:54	25.125	10.8
2019-12-11 04:07:54	25.125	10.8
2019-12-11 04:22:54	25.125	10.8
2019-12-11 04:37:54	25.125	10.8
2019-12-11 04:52:54	25.125	10.8
2019-12-11 05:07:54	25.125	10.8
2019-12-11 05:22:54	25.125	10.8
2019-12-11 05:37:54	25.125	10.8
2019-12-11 05:52:54	25.125	10.8
2019-12-11 06:07:54	25.125	10.8
2019-12-11 06:22:54	25.125	10.8
2019-12-11 06:37:54	25.125	10.8
2019-12-11 06:52:54	25.125	10.8
2019-12-11 07:07:54	25.125	10.8
2019-12-11 07:22:54	25.125	10.8
2019-12-11 07:37:54	25.125	10.8
2019-12-11 07:52:54	25.125	10.8
2019-12-11 08:07:54	25.125	10.8
2019-12-11 08:22:54	25.125	10.8
2019-12-11 08:37:54	25.125	10.8
2019-12-11 08:52:54	25.125	10.8
2019-12-11 09:07:54	25.125	10.8
2019-12-11 09:22:54	25.125	10.8
2019-12-11 09:37:54	25.125	10.8
2019-12-11 09:52:54	25.125	10.8
2019-12-11 10:07:54	25.125	10.8
2019-12-11 10:22:54	25.125	10.8
2019-12-11 10:37:54	25.125	10.8
2019-12-11 10:52:54	25.028	10.8
2019-12-11 11:07:54	25.028	10.8
2019-12-11 11:22:54	25.028	10.8
2019-12-11 11:37:54	25.028	10.8
2019-12-11 11:52:54	25.028	10.8
2019-12-11 12:07:54	24.931	10.8
2019-12-11 12:22:54	25.028	10.8
2019-12-11 12:37:54	25.125	10.8
2019-12-11 12:52:54	25.125	10.8
2019-12-11 13:07:54	25.125	10.8
2019-12-11 13:22:54	25.125	10.8
2019-12-11 13:37:54	25.125	10.8
2019-12-11 13:52:54	25.125	10.8
2019-12-11 14:07:54	25.125	10.8
2019-12-11 14:22:54	25.125	10.8
2019-12-11 14:37:54	25.125	10.8
2019-12-11 14:52:54	25.222	10.8
2019-12-11 15:07:54	25.125	10.8
2019-12-11 15:22:54	25.222	10.8
2019-12-11 15:37:54	25.222	10.8
2019-12-11 15:52:54	25.222	10.8
2019-12-11 16:07:54	25.222	10.8
2019-12-11 16:22:54	25.125	10.8
2019-12-11 16:37:54	25.125	10.8
2019-12-11 16:52:54	25.222	10.8
2019-12-11 17:07:54	25.222	10.8
2019-12-11 17:22:54	25.222	10.8
2019-12-11 17:37:54	25.222	10.8
2019-12-11 17:52:54	25.222	10.8
2019-12-11 18:07:54	25.222	10.8
2019-12-11 18:22:54	25.222	10.8
2019-12-11 18:37:54	25.222	10.8
2019-12-11 18:52:54	25.222	10.8
2019-12-11 19:07:54	25.222	10.8
2019-12-11 19:22:54	25.222	10.8
2019-12-11 19:37:54	25.222	10.8
2019-12-11 19:52:54	25.222	10.8
2019-12-11 20:07:54	25.222	10.8
2019-12-11 20:22:54	25.222	10.8
2019-12-11 20:37:54	25.222	10.8
2019-12-11 20:52:54	25.222	10.8
2019-12-11 21:07:54	25.222	10.8
2019-12-11 21:22:54	25.222	10.8
2019-12-11 21:37:54	25.222	10.8
2019-12-11 21:52:54	25.222	10.8
2019-12-11 22:07:54	25.222	10.8
2019-12-11 22:22:54	25.222	10.8
2019-12-11 22:37:54	25.222	10.8
2019-12-11 22:52:54	25.222	10.8
2019-12-11 23:07:54	25.222	10.8
2019-12-11 23:22:54	25.222	10.8
2019-12-11 23:37:54	25.222	10.8
2019-12-11 23:52:54	25.222	10.8
11/13/2019 12:07:54 am	25.222	10.8
11/13/2019 12:22:54 am	25.222	10.8
11/13/2019 12:37:54 am	25.222	10.8
11/13/2019 12:52:54 am	25.222	10.8
11/13/2019 01:07:54 am	25.222	10.8
11/13/2019 01:22:54 am	25.222	10.8
11/13/2019 01:37:54 am	25.222	10.8
11/13/2019 01:52:54 am	25.222	10.8
11/13/2019 02:07:54 am	25.222	10.8
11/13/2019 02:22:54 am	25.222	10.8
11/13/2019 02:37:54 am	25.222	10.8
11/13/2019 02:52:54 am	25.222	10.8
11/13/2019 03:07:54 am	25.222	10.8
11/13/2019 03:22:54 am	25.222	10.8
11/13/2019 03:37:54 am	25.222	10.8
11/13/2019 03:52:54 am	25.222	10.8
11/13/2019 04:07:54 am	25.222	10.8
11/13/2019 04:22:54 am	25.222	10.8
11/13/2019 04:37:54 am	25.222	10.8
11/13/2019 04:52:54 am	25.222	10.8
11/13/2019 05:07:54 am	25.222	10.8
11/13/2019 05:22:54 am	25.222	10.8
11/13/2019 05:37:54 am	25.222	10.8
11/13/2019 05:52:54 am	25.222	10.8
11/13/2019 06:07:54 am	25.222	10.8
11/13/2019 06:22:54 am	25.222	10.8
11/13/2019 06:37:54 am	25.222	10.8
11/13/2019 06:52:54 am	25.222	10.8
11/13/2019 07:07:54 am	25.222	10.8
11/13/2019 07:22:54 am	25.125	10.8
11/13/2019 07:37:54 am	25.125	10.8
11/13/2019 07:52:54 am	25.125	10.8
11/13/2019 08:07:54 am	25.125	10.8
11/13/2019 08:22:54 am	25.028	10.8
11/13/2019 08:37:54 am	25.028	10.8
11/13/2019 08:52:54 am	25.125	10.8
11/13/2019 09:07:54 am	25.319	10.8
11/13/2019 09:22:54 am	25.319	10.8
11/13/2019 09:37:54 am	25.222	10.8
11/13/2019 09:52:54 am	25.222	10.8
11/13/2019 10:07:54 am	25.222	10.8
11/13/2019 10:22:54 am	25.222	10.8
11/13/2019 10:37:54 am	25.222	21.5
11/13/2019 10:52:54 am	25.222	21.5
11/13/2019 11:07:54 am	25.222	10.8
11/13/2019 11:22:54 am	25.222	10.8
11/13/2019 11:37:54 am	25.222	10.8
11/13/2019 11:52:54 am	25.222	10.8
11/13/2019 12:07:54 pm	25.222	10.8
11/13/2019 12:22:54 pm	25.125	10.8
11/13/2019 12:37:54 pm	25.125	10.8
11/13/2019 12:52:54 pm	25.222	10.8
11/13/2019 01:07:54 pm	25.222	10.8
11/13/2019 01:22:54 pm	25.222	10.8
11/13/2019 01:37:54 pm	25.222	10.8
11/13/2019 01:52:54 pm	25.222	10.8
11/13/2019 02:07:54 pm	25.222	10.8
11/13/2019 02:22:54 pm	25.222	10.8
11/13/2019 02:37:54 pm	25.222	10.8
11/13/2019 02:52:54 pm	25.222	10.8
11/13/2019 03:07:54 pm	25.125	10.8
11/13/2019 03:22:54 pm	25.125	10.8
11/13/2019 03:37:54 pm	25.222	10.8
11/13/2019 03:52:54 pm	25.125	10.8
11/13/2019 04:07:54 pm	25.125	10.8
11/13/2019 04:22:54 pm	25.222	10.8
11/13/2019 04:37:54 pm	25.125	10.8
11/13/2019 04:52:54 pm	25.125	10.8
11/13/2019 05:07:54 pm	25.125	10.8
11/13/2019 05:22:54 pm	25.125	10.8
11/13/2019 05:37:54 pm	25.125	10.8
11/13/2019 05:52:54 pm	25.125	10.8
11/13/2019 06:07:54 pm	25.125	10.8
11/13/2019 06:22:54 pm	25.125	10.8
11/13/2019 06:37:54 pm	25.125	10.8
11/13/2019 06:52:54 pm	25.125	10.8
11/13/2019 07:07:54 pm	25.125	10.8
11/13/2019 07:22:54 pm	25.125	10.8
11/13/2019 07:37:54 pm	25.125	10.8
11/13/2019 07:52:54 pm	25.125	10.8
11/13/2019 08:07:54 pm	25.125	10.8
11/13/2019 08:22:54 pm	25.125	10.8
11/13/2019 08:37:54 pm	25.125	10.8
11/13/2019 08:52:54 pm	25.125	10.8
11/13/2019 09:07:54 pm	25.125	10.8
11/13/2019 09:22:54 pm	25.125	10.8
11/13/2019 09:37:54 pm	25.125	10.8
11/13/2019 09:52:54 pm	25.125	10.8
11/13/2019 10:07:54 pm	25.125	10.8
11/13/2019 10:22:54 pm	25.125	10.8
11/13/2019 10:37:54 pm	25.125	10.8
11/13/2019 10:52:54 pm	25.125	10.8
11/13/2019 11:07:54 pm	25.125	10.8
11/13/2019 11:22:54 pm	25.125	10.8
11/13/2019 11:37:54 pm	25.125	10.8
11/13/2019 11:52:54 pm	25.125	10.8
11/14/2019 12:07:54 am	25.125	10.8
11/14/2019 12:22:54 am	25.125	10.8
11/14/2019 12:37:54 am	25.125	10.8
11/14/2019 12:52:54 am	25.125	10.8
11/14/2019 01:07:54 am	25.125	10.8
11/14/2019 01:22:54 am	25.125	10.8
11/14/2019 01:37:54 am	25.125	10.8
11/14/2019 01:52:54 am	25.125	10.8
11/14/2019 02:07:54 am	25.125	10.8
11/14/2019 02:22:54 am	25.125	10.8
11/14/2019 02:37:54 am	25.125	10.8
11/14/2019 02:52:54 am	25.125	10.8
11/14/2019 03:07:54 am	25.125	10.8
11/14/2019 03:22:54 am	25.125	10.8
11/14/2019 03:37:54 am	25.125	10.8
11/14/2019 03:52:54 am	25.125	10.8
11/14/2019 04:07:54 am	25.125	10.8
11/14/2019 04:22:54 am	25.125	10.8
11/14/2019 04:37:54 am	25.028	10.8
11/14/2019 04:52:54 am	25.028	10.8
11/14/2019 05:07:54 am	25.028	10.8
11/14/2019 05:22:54 am	25.028	10.8
11/14/2019 05:37:54 am	25.028	10.8
11/14/2019 05:52:54 am	25.028	10.8
11/14/2019 06:07:54 am	25.028	10.8
11/14/2019 06:22:54 am	25.028	10.8
11/14/2019 06:37:54 am	25.125	10.8
11/14/2019 06:52:54 am	25.028	10.8
11/14/2019 07:07:54 am	25.028	10.8
11/14/2019 07:22:54 am	25.028	10.8
11/14/2019 07:37:54 am	25.125	10.8
11/14/2019 07:52:54 am	25.125	10.8
11/14/2019 08:07:54 am	25.125	10.8
11/14/2019 08:22:54 am	25.125	10.8
11/14/2019 08:37:54 am	25.125	10.8
11/14/2019 08:52:54 am	25.125	10.8
11/14/2019 09:07:54 am	25.125	10.8
11/14/2019 09:22:54 am	25.125	10.8
11/14/2019 09:37:54 am	25.125	10.8
11/14/2019 09:52:54 am	25.125	10.8
11/14/2019 10:07:54 am	25.125	10.8
11/14/2019 10:22:54 am	25.125	10.8
11/14/2019 10:37:54 am	25.125	10.8
11/14/2019 10:52:54 am	25.028	10.8
11/14/2019 11:07:54 am	25.028	10.8
11/14/2019 11:22:54 am	25.028	10.8
11/14/2019 11:37:54 am	25.028	10.8
11/14/2019 11:52:54 am	25.028	10.8
11/14/2019 12:07:54 pm	25.028	10.8
11/14/2019 12:22:54 pm	25.028	10.8
11/14/2019 12:37:54 pm	24.931	10.8
11/14/2019 12:52:54 pm	24.931	10.8
11/14/2019 01:07:54 pm	24.931	10.8
11/14/2019 01:22:54 pm	24.931	10.8
11/14/2019 01:37:54 pm	25.028	10.8
11/14/2019 01:52:54 pm	25.125	10.8
11/14/2019 02:07:54 pm	25.125	10.8
11/14/2019 02:22:54 pm	25.125	10.8
11/14/2019 02:37:54 pm	25.028	10.8
11/14/2019 02:52:54 pm	25.028	10.8
11/14/2019 03:07:54 pm	25.028	10.8
11/14/2019 03:22:54 pm	25.028	10.8
11/14/2019 03:37:54 pm	25.028	10.8
11/14/2019 03:52:54 pm	25.028	10.8
11/14/2019 04:07:54 pm	25.028	10.8
11/14/2019 04:22:54 pm	25.028	10.8
11/14/2019 04:37:54 pm	25.125	10.8
11/14/2019 04:52:54 pm	25.125	10.8
11/14/2019 05:07:54 pm	25.125	10.8
11/14/2019 05:22:54 pm	25.125	10.8
11/14/2019 05:37:54 pm	25.125	10.8
11/14/2019 05:52:54 pm	25.125	10.8
11/14/2019 06:07:54 pm	25.125	10.8
11/14/2019 06:22:54 pm	25.222	10.8
11/14/2019 06:37:54 pm	25.222	10.8
11/14/2019 06:52:54 pm	25.125	10.8
11/14/2019 07:07:54 pm	25.222	10.8
11/14/2019 07:22:54 pm	25.222	10.8
11/14/2019 07:37:54 pm	25.222	10.8
11/14/2019 07:52:54 pm	25.222	10.8
11/14/2019 08:07:54 pm	25.222	10.8
11/14/2019 08:22:54 pm	25.222	10.8
11/14/2019 08:37:54 pm	25.222	10.8
11/14/2019 08:52:54 pm	25.222	10.8
11/14/2019 09:07:54 pm	25.222	10.8
11/14/2019 09:22:54 pm	25.222	10.8
11/14/2019 09:37:54 pm	25.222	10.8
11/14/2019 09:52:54 pm	25.222	10.8
11/14/2019 10:07:54 pm	25.125	10.8
11/14/2019 10:22:54 pm	25.222	10.8
11/14/2019 10:37:54 pm	25.125	10.8
11/14/2019 10:52:54 pm	25.125	10.8
11/14/2019 11:07:54 pm	25.125	10.8
11/14/2019 11:22:54 pm	25.125	10.8
11/14/2019 11:37:54 pm	25.125	10.8
11/14/2019 11:52:54 pm	25.125	10.8
11/15/2019 12:07:54 am	25.125	10.8
11/15/2019 12:22:54 am	25.125	10.8
11/15/2019 12:37:54 am	25.125	10.8
11/15/2019 12:52:54 am	25.125	10.8
11/15/2019 01:07:54 am	25.125	10.8
11/15/2019 01:22:54 am	25.125	10.8
11/15/2019 01:37:54 am	25.125	10.8
11/15/2019 01:52:54 am	25.125	10.8
11/15/2019 02:07:54 am	25.125	10.8
11/15/2019 02:22:54 am	25.125	10.8
11/15/2019 02:37:54 am	25.125	10.8
11/15/2019 02:52:54 am	25.125	10.8
11/15/2019 03:07:54 am	25.125	10.8
11/15/2019 03:22:54 am	25.125	10.8
11/15/2019 03:37:54 am	25.125	10.8
11/15/2019 03:52:54 am	25.125	10.8
11/15/2019 04:07:54 am	25.125	10.8
11/15/2019 04:22:54 am	25.222	10.8
11/15/2019 04:37:54 am	25.222	10.8
11/15/2019 04:52:54 am	25.125	10.8
11/15/2019 05:07:54 am	25.125	10.8
11/15/2019 05:22:54 am	25.125	10.8
11/15/2019 05:37:54 am	25.125	10.8
11/15/2019 05:52:54 am	25.125	10.8
11/15/2019 06:07:54 am	25.125	10.8
11/15/2019 06:22:54 am	25.125	10.8
11/15/2019 06:37:54 am	25.125	10.8
11/15/2019 06:52:54 am	25.125	10.8
11/15/2019 07:07:54 am	25.125	10.8
11/15/2019 07:22:54 am	25.125	10.8
11/15/2019 07:37:54 am	25.125	10.8
11/15/2019 07:52:54 am	25.125	10.8
11/15/2019 08:07:54 am	25.125	10.8
11/15/2019 08:22:54 am	25.125	10.8
11/15/2019 08:37:54 am	25.125	10.8
11/15/2019 08:52:54 am	25.125	10.8
11/15/2019 09:07:54 am	25.125	32.3
11/15/2019 09:22:54 am	25.222	21.5
11/15/2019 09:37:54 am	25.222	32.3
11/15/2019 09:52:54 am	25.222	21.5
11/15/2019 10:07:54 am	25.222	32.3
11/15/2019 10:22:54 am	25.222	32.3
11/15/2019 10:37:54 am	25.319	21.5
11/15/2019 10:52:54 am	25.319	32.3
11/15/2019 11:07:54 am	25.319	32.3
11/15/2019 11:22:54 am	25.319	32.3
11/15/2019 11:37:54 am	25.319	32.3
11/15/2019 11:52:54 am	25.319	21.5
11/15/2019 12:07:54 pm	25.222	32.3
11/15/2019 12:22:54 pm	25.222	32.3
11/15/2019 12:37:54 pm	25.222	32.3
11/15/2019 12:52:54 pm	25.222	21.5
11/15/2019 01:07:54 pm	25.222	21.5
11/15/2019 01:22:54 pm	25.222	32.3
11/15/2019 01:37:54 pm	25.222	21.5
11/15/2019 01:52:54 pm	25.222	32.3
11/15/2019 02:07:54 pm	25.222	32.3
11/15/2019 02:22:54 pm	25.222	21.5
11/15/2019 02:37:54 pm	25.222	32.3
11/15/2019 02:52:54 pm	25.222	32.3
11/15/2019 03:07:54 pm	25.222	32.3
11/15/2019 03:22:54 pm	25.319	21.5
11/15/2019 03:37:54 pm	25.319	32.3
11/15/2019 03:52:54 pm	25.319	32.3
11/15/2019 04:07:54 pm	25.222	21.5
11/15/2019 04:22:54 pm	25.222	21.5
11/15/2019 04:37:54 pm	25.222	21.5
11/15/2019 04:52:54 pm	25.319	10.8
11/15/2019 05:07:54 pm	25.319	10.8
11/15/2019 05:22:54 pm	25.319	10.8
11/15/2019 05:37:54 pm	25.222	10.8
11/15/2019 05:52:54 pm	25.222	10.8
11/15/2019 06:07:54 pm	25.319	10.8
11/15/2019 06:22:54 pm	25.222	10.8
11/15/2019 06:37:54 pm	25.222	10.8
11/15/2019 06:52:54 pm	25.222	10.8
11/15/2019 07:07:54 pm	25.222	10.8
11/15/2019 07:22:54 pm	25.222	10.8
11/15/2019 07:37:54 pm	25.222	10.8
11/15/2019 07:52:54 pm	25.222	10.8

## Sheet: Video_d1
SC	Replicat
	1	2	3	4	5	6	7	8
Av. Speed (mm/s)	2.04979	50.829	1.6739	2.21368	18.1025	18.1444	16.2442	3.48394
Mob. Av. Speed (mm/s)	7.74144	52.9217	8.1914	6.14253	24.1473	19.1891	16.9583	5.80149
Av. Accel (mm/s^2)	5.93771	50.2699	5.55629	4.88802	38.6883	28.5529	30.7857	8.3412
Mobility Rate (%)	0.245864	0.959496	0.185699	0.341782	0.741764	0.943909	0.956045	0.580176
Visible Frames	7500	7386	7500	7500	7350	7474	7398	7500
Visible Time (m:s)	0:05:00	0:04:55.440000	0:05:00	0:05:00	0:04:54	0:04:58.960000	0:04:55.920000	0:05:00
Invisible Frames	0	114	0	0	150	26	102	0
Invisible Time (m:s)	0:00:00	0:00:04.560000	0:00:00	0:00:00	0:00:06	0:00:01.040000	0:00:04.080000	0:00:00
First Visible Frame	7500	7500	7500	7500	7500	7500	7500	7500
Last Visible Frame	14999	14999	14999	14999	14999	14999	14999	14999
Visibility Rate (%)	1	0.9848	1	1	0.98	0.996533	0.9864	1
Invisibility Rate (%)	0	0.0152	0	0	0.02	0.00346667	0.0136	0
Explored Areas	4	4	6	4	6	4	6	4
Number of Areas	9	9	9	9	9	9	9	9
Exploration Rate (%)	0.444444	0.444444	0.666667	0.444444	0.666667	0.444444	0.666667	0.444444
Total Distance (mm)	640.844	15312.5	539.174	683.156	5469.7	5470.85	4896.99	1072.23
Transitions In	0	0	0	0	0	0	0	0
Transitions Out	0	0	0	0	0	0	0	0
Frozen Events	7	3	5	7	3	1	1	12
Tot. Time Frozen (m:s)	0:03:53.360000	0:00:15.520000	0:04:28	0:03:33.240000	0:01:02.440000	0:00:03.840000	0:00:04.960000	0:02:05.560000
Avg. Time Frozen (m:s)	0:00:33.337000	0:00:05.173000	0:00:53.600000	0:00:30.463000	0:00:20.813000	0:00:03.840000	0:00:04.960000	0:00:10.463000
NC	Replicat
	1	2	3	4	5	6	7	8
Av. Speed (mm/s)	23.3154	27.9156	17.1277	9.79714	20.3112	0.221478	28.8343	4.69033
Mob. Av. Speed (mm/s)	24.8274	29.9083	19.5198	12.5381	20.6923	1.29629	31.1416	8.83434
Av. Accel (mm/s^2)	38.6512	43.4232	23.8346	12.9316	31.5775	1.29296	44.4702	9.31262
Mobility Rate (%)	0.937833	0.932497	0.874733	0.77548	0.980662	0.0133404	0.924571	0.516942
Visible Frames	7500	7500	7500	7500	7347	7500	7468	7500
Visible Time (m:s)	0:05:00	0:05:00	0:05:00	0:05:00	0:04:53.880000	0:05:00	0:04:58.720000	0:05:00
Invisible Frames	0	0	0	0	153	0	32	0
Invisible Time (m:s)	0:00:00	0:00:00	0:00:00	0:00:00	0:00:06.120000	0:00:00	0:00:01.280000	0:00:00
First Visible Frame	7500	7500	7500	7500	7500	7500	7500	7500
Last Visible Frame	14999	14999	14999	14999	14999	14999	14999	14999
Visibility Rate (%)	1	1	1	1	0.9796	1	0.995733	1
Invisibility Rate (%)	0	0	0	0	0.0204	0	0.00426667	0
Explored Areas	4	7	4	7	6	1	4	4
Number of Areas	9	9	9	9	9	9	9	9
Exploration Rate (%)	0.444444	0.777778	0.444444	0.777778	0.666667	0.111111	0.444444	0.444444
Total Distance (mm)	7024	8412.92	5170	2960.39	6122.24	100.434	8687.61	1434.3
Transitions In	0	0	0	0	0	0	0	0
Transitions Out	0	0	0	0	0	0	0	0
Frozen Events	1	3	4	5	0	1	2	9
Tot. Time Frozen (m:s)	0:00:07.320000	0:00:11.560000	0:00:26.680000	0:01:23.760000	0:00:00	0:04:59.960000	0:00:09.040000	0:02:21.200000
Avg. Time Frozen (m:s)	0:00:07.320000	0:00:03.853000	0:00:06.670000	0:00:16.752000	0:00:00	0:04:59.960000	0:00:04.520000	0:00:15.689000
PC	Replicat
	1	2	3	4	5	6	7	8
Av. Speed (mm/s)	20.3743	0.368975	0.261014	0.0854742		1.12119		29.3532
Mob. Av. Speed (mm/s)	20.6175	1.3517	1.1923	1.64182		2.08914		30.172
Av. Accel (mm/s^2)	30.1214	2.46301	1.44469	0.405668		4.18328		40.2101
Mobility Rate (%)	0.987387	0.126334	0.0281483	0.0280149		0.414088		0.972031
Visible Frames	7219	7500	7500	7500		7500		7405
Visible Time (m:s)	0:04:48.760000	0:05:00	0:05:00	0:05:00		0:05:00		0:04:56.200000
Invisible Frames	281	0	0	0		0		95
Invisible Time (m:s)	0:00:11.240000	0:00:00	0:00:00	0:00:00		0:00:00		0:00:03.800000
First Visible Frame	7500	7500	7500	7500		7500		7500
Last Visible Frame	14999	14999	14999	14999		14999		14999
Visibility Rate (%)	0.962533	1	1	1		1		0.987333
Invisibility Rate (%)	0.0374667	0	0	0		0		0.0126667
Explored Areas	6	1	1	1		4		4
Number of Areas	9	9	9	9		9		9
Exploration Rate (%)	0.666667	0.111111	0.111111	0.111111		0.444444		0.444444
Total Distance (mm)	6169.64	148.945	123.693	32.4276		377.786		8864.36
Transitions In	0	0	0	0		0		0
Transitions Out	0	0	0	0		0		0
Frozen Events	0	1	1	1		12		1
Tot. Time Frozen (m:s)	0:00:00	0:04:59.960000	0:04:59.960000	0:04:59.960000		0:03:41.680000		0:00:08.520000
Avg. Time Frozen (m:s)	0:00:00	0:04:59.960000	0:04:59.960000	0:04:59.960000		0:00:18.473000		0:00:08.520000
0.4 g/L	Replicat
	1	2	3	4	5	6	7	8
Av. Speed (mm/s)	8.57954	19.7149	28.1436	9.26771	21.2236	4.73958	1.86155	6.48238
Mob. Av. Speed (mm/s)	11.1598	26.0619	32.3205	11.4136	23.8956	8.95144	6.00936	12.5985
Av. Accel (mm/s^2)	13.9994	47.1649	48.0032	18.0381	31.6362	10.5989	4.86656	13.5106
Mobility Rate (%)	0.760139	0.752801	0.86828	0.805229	0.886473	0.517743	0.283218	0.504351
Visible Frames	7500	7500	7444	7500	7500	7500	7500	7473
Visible Time (m:s)	0:05:00	0:05:00	0:04:57.760000	0:05:00	0:05:00	0:05:00	0:05:00	0:04:58.920000
Invisible Frames	0	0	56	0	0	0	0	27
Invisible Time (m:s)	0:00:00	0:00:00	0:00:02.240000	0:00:00	0:00:00	0:00:00	0:00:00	0:00:01.080000
First Visible Frame	7500	7500	7500	7500	7500	7500	7500	7500
Last Visible Frame	14999	14999	14999	14999	14999	14999	14999	14999
Visibility Rate (%)	1	1	0.992533	1	1	1	1	0.9964
Invisibility Rate (%)	0	0	0.00746667	0	0	0	0	0.0036
Explored Areas	4	4	6	6	6	4	4	4
Number of Areas	9	9	9	9	9	9	9	9
Exploration Rate (%)	0.444444	0.444444	0.666667	0.666667	0.666667	0.444444	0.444444	0.444444
Total Distance (mm)	2604.86	5954.24	8484.67	2812.67	6401.69	1445.09	583.729	1979.47
Transitions In	0	0	0	0	0	0	0	0
Transitions Out	0	0	0	0	0	0	0	0
Frozen Events	7	6	5	9	4	10	7	12
Tot. Time Frozen (m:s)	0:01:06.840000	0:01:23.520000	0:00:26.320000	0:00:50.160000	0:00:32.120000	0:02:24.680000	0:03:47.560000	0:02:29.880000
Avg. Time Frozen (m:s)	0:00:09.549000	0:00:13.920000	0:00:05.264000	0:00:05.573000	0:00:08.030000	0:00:14.468000	0:00:32.509000	0:00:12.490000
1 g/L	Replicat
	1	2	3	4	5	6	7	8
Av. Speed (mm/s)	16.4813	25.6912	10.7476	21.5663	22.0521	12.055	11.625	4.87289
Mob. Av. Speed (mm/s)	19.3835	26.9563	17.0953	32.0188	25.0947	17.2785	17.2178	7.93133
Av. Accel (mm/s^2)	31.314	57.1327	17.1139	45.2968	47.8217	30.8401	27.3753	13.643
Mobility Rate (%)	0.845459	0.951509	0.622624	0.66979	0.876075	0.692769	0.663168	0.595425
Visible Frames	7426	7325	7474	7475	7444	7500	7340	7392
Visible Time (m:s)	0:04:57.040000	0:04:53	0:04:58.960000	0:04:59	0:04:57.760000	0:05:00	0:04:53.600000	0:04:55.680000
Invisible Frames	74	175	26	25	56	0	160	108
Invisible Time (m:s)	0:00:02.960000	0:00:07	0:00:01.040000	0:00:01	0:00:02.240000	0:00:00	0:00:06.400000	0:00:04.320000
First Visible Frame	7500	7500	7500	7500	7500	7500	7500	7500
Last Visible Frame	14999	14999	14999	14999	14999	14999	14999	14999
Visibility Rate (%)	0.990133	0.976667	0.996533	0.996667	0.992533	1	0.978667	0.9856
Invisibility Rate (%)	0.00986667	0.0233333	0.00346667	0.00333333	0.00746667	0	0.0213333	0.0144
Explored Areas	4	4	7	4	4	4	4	7
Number of Areas	9	9	9	9	9	9	9	9
Exploration Rate (%)	0.444444	0.444444	0.777778	0.444444	0.444444	0.444444	0.444444	0.777778
Total Distance (mm)	4983.72	7778.16	3247.79	6517.37	6646.13	3677.11	3526	1489.39
Transitions In	0	0	0	0	0	0	0	0
Transitions Out	0	0	0	0	0	0	0	0
Frozen Events	3	2	9	11	3	9	13	16
Tot. Time Frozen (m:s)	0:00:13.600000	0:00:10.120000	0:02:05.920000	0:01:23.960000	0:00:20.480000	0:01:30.120000	0:01:36.080000	0:01:35
Avg. Time Frozen (m:s)	0:00:04.533000	0:00:05.060000	0:00:13.991000	0:00:07.633000	0:00:06.827000	0:00:10.013000	0:00:07.391000	0:00:05.937000
2.5 g/L	Replicat
	1	2	3	4	5	6	7	8
Av. Speed (mm/s)	1.96851	3.63194	0.950975	25.4993	5.45239	0.769241	15.1635	27.777
Mob. Av. Speed (mm/s)	5.45549	10.833	4.68476	26.422	9.30643	4.46833	16.777	33.3869
Av. Accel (mm/s^2)	5.83942	6.21756	2.89947	53.4351	10.054	3.12579	24.1227	37.1109
Mobility Rate (%)	0.325774	0.314477	0.173426	0.961214	0.568047	0.142343	0.900512	0.826229
Visible Frames	7500	7464	7500	6888	7440	7500	7422	7347
Visible Time (m:s)	0:05:00	0:04:58.560000	0:05:00	0:04:35.520000	0:04:57.600000	0:05:00	0:04:56.880000	0:04:53.880000
Invisible Frames	0	36	0	612	60	0	78	153
Invisible Time (m:s)	0:00:00	0:00:01.440000	0:00:00	0:00:24.480000	0:00:02.400000	0:00:00	0:00:03.120000	0:00:06.120000
First Visible Frame	7500	7500	7500	7500	7500	7500	7500	7500
Last Visible Frame	14999	14999	14999	14999	14999	14999	14999	14999
Visibility Rate (%)	1	0.9952	1	0.9184	0.992	1	0.9896	0.9796
Invisibility Rate (%)	0	0.0048	0	0.0816	0.008	0	0.0104	0.0204
Explored Areas	4	4	4	6	4	2	6	4
Number of Areas	9	9	9	9	9	9	9	9
Exploration Rate (%)	0.444444	0.444444	0.444444	0.666667	0.444444	0.222222	0.666667	0.444444
Total Distance (mm)	627.886	1129.12	308.901	7699.71	1670.22	249.827	4574.76	8401.78
Transitions In	0	0	0	0	0	0	0	0
Transitions Out	0	0	0	0	0	0	0	0
Frozen Events	11	4	5	0	13	10	2	6
Tot. Time Frozen (m:s)	0:03:51.600000	0:03:41.320000	0:04:26.680000	0:00:00	0:02:13.560000	0:04:40.440000	0:00:20.600000	0:00:58.640000
Avg. Time Frozen (m:s)	0:00:21.055000	0:00:55.330000	0:00:53.336000	0:00:00	0:00:10.274000	0:00:28.044000	0:00:10.300000	0:00:09.773000
6.25 g/L	Replicat
	1	2	3	4	5	6	7	8
Av. Speed (mm/s)	5.08514	0.564496	4.20003	17.0896	0.441559	0.168668	13.4448	11.2371
Mob. Av. Speed (mm/s)	10.2979	3.50985	8.70622	21.0559	4.05675	1.75978	17.448	17.1842
Av. Accel (mm/s^2)	11.7005	1.81712	8.76126	29.8874	1.56687	0.926918	24.9722	17.5853
Mobility Rate (%)	0.480054	0.101539	0.46785	0.808164	0.0805763	0.0381537	0.766895	0.647812
Visible Frames	7474	7410	7500	7500	7500	7500	7447	7500
Visible Time (m:s)	0:04:58.960000	0:04:56.400000	0:05:00	0:05:00	0:05:00	0:05:00	0:04:57.880000	0:05:00
Invisible Frames	26	90	0	0	0	0	53	0
Invisible Time (m:s)	0:00:01.040000	0:00:03.600000	0:00:00	0:00:00	0:00:00	0:00:00	0:00:02.120000	0:00:00
First Visible Frame	7500	7500	7500	7500	7500	7500	7500	7500
Last Visible Frame	14999	14999	14999	14999	14999	14999	14999	14999
Visibility Rate (%)	0.996533	0.988	1	1	1	1	0.992933	1
Invisibility Rate (%)	0.00346667	0.012	0	0	0	0	0.00706667	0
Explored Areas	4	3	5	5	3	2	7	4
Number of Areas	9	9	9	9	9	9	9	9
Exploration Rate (%)	0.444444	0.333333	0.555556	0.555556	0.333333	0.222222	0.777778	0.444444
Total Distance (mm)	1552.66	185.125	1285.62	5160.61	149.152	63.8976	4069.42	3409.1
Transitions In	0	0	0	0	0	0	0	0
Transitions Out	0	0	0	0	0	0	0	0
Frozen Events	10	5	7	7	6	1	4	11
Tot. Time Frozen (m:s)	0:02:23.600000	0:04:38.680000	0:02:33.640000	0:00:41.240000	0:04:45.360000	0:04:52.400000	0:01:07.360000	0:01:59.040000
Avg. Time Frozen (m:s)	0:00:14.360000	0:00:55.736000	0:00:21.949000	0:00:05.891000	0:00:47.560000	0:04:52.400000	0:00:16.840000	0:00:10.822000
15.6 g/L	Replicat
	1	2	3	4	5	6	7	8
Av. Speed (mm/s)	27.5102	34.5496	14.7702	12.1129	0.371739	17.3378	1.9116	6.88588
Mob. Av. Speed (mm/s)	28.1614	35.0332	21.8306	16.7029	2.14042	18.3117	5.91676	8.53026
Av. Accel (mm/s^2)	22.0246	53.1263	21.6053	21.2812	1.9791	19.243	5.53105	11.2445
Mobility Rate (%)	0.976016	0.98577	0.672492	0.719851	0.0860459	0.945571	0.288687	0.798159
Visible Frames	7384	7383	7500	7500	7500	7500	7500	7500
Visible Time (m:s)	0:04:55.360000	0:04:55.320000	0:05:00	0:05:00	0:05:00	0:05:00	0:05:00	0:05:00
Invisible Frames	116	117	0	0	0	0	0	0
Invisible Time (m:s)	0:00:04.640000	0:00:04.680000	0:00:00	0:00:00	0:00:00	0:00:00	0:00:00	0:00:00
First Visible Frame	7500	7500	7500	7500	7500	7500	7500	7500
Last Visible Frame	14999	14999	14999	14999	14999	14999	14999	14999
Visibility Rate (%)	0.984533	0.9844	1	1	1	1	1	1
Invisibility Rate (%)	0.0154667	0.0156	0	0	0	0	0	0
Explored Areas	4	8	6	6	2	4	4	4
Number of Areas	9	9	9	9	9	9	9	9
Exploration Rate (%)	0.444444	0.888889	0.666667	0.666667	0.222222	0.444444	0.444444	0.444444
Total Distance (mm)	8276.5	10399.6	4457.09	3675.83	136.777	5214.79	612.25	2099.11
Transitions In	0	0	0	0	0	0	0	0
Transitions Out	0	0	0	0	0	0	0	0
Frozen Events	0	1	11	9	2	2	13	5
Tot. Time Frozen (m:s)	0:00:00	0:00:04.600000	0:01:40.440000	0:01:23.520000	0:04:55.640000	0:00:08	0:04:10.440000	0:00:41.120000
Avg. Time Frozen (m:s)	0:00:00	0:00:04.600000	0:00:09.131000	0:00:09.280000	0:02:27.820000	0:00:04	0:00:19.265000	0:00:08.224000

## Sheet: Video_d3
SC	Replicat
	1	2	3	4	5	6	7	8
Av. Speed (mm/s)	3.20668	4.51605	0.101752	3.19038	24.0008	12.3599	3.84637	5.84609
Mob. Av. Speed (mm/s)	6.95372	8.2601	1.20279	5.83216	27.0066	17.4004	6.33691	9.85846
Av. Accel (mm/s^2)	7.35294	9.63807	0.729695	6.29674	48.8666	18.176	8.55547	13.3878
Mobility Rate (%)	0.442786	0.529082	0.00280149	0.524909	0.885121	0.695754	0.587647	0.580979
Visible Frames	7441	7500	7500	7451	7377	7258	7500	7438
Visible Time (m:s)	0:04:57.640000	0:05:00	0:05:00	0:04:58.040000	0:04:55.080000	0:04:50.320000	0:05:00	0:04:57.520000
Invisible Frames	59	0	0	49	123	242	0	62
Invisible Time (m:s)	0:00:02.360000	0:00:00	0:00:00	0:00:01.960000	0:00:04.920000	0:00:09.680000	0:00:00	0:00:02.480000
First Visible Frame	7500	7500	7500	7500	7500	7500	7500	7500
Last Visible Frame	14999	14999	14999	14999	14999	14999	14999	14999
Visibility Rate (%)	0.992133	1	1	0.993467	0.9836	0.967733	1	0.991733
Invisibility Rate (%)	0.00786667	0	0	0.00653333	0.0164	0.0322667	0	0.00826667
Explored Areas	4	4	1	4	4	4	4	6
Number of Areas	9	9	9	9	6	9	9	9
Exploration Rate (%)	0.444444	0.444444	0.111111	0.444444	0.666667	0.444444	0.444444	0.666667
Total Distance (mm)	992.517	1381.57	45.5323	983.821	7250.24	3742.98	1182.83	1786.11
Transitions In	0	0	0	0	0	0	0	0
Transitions Out	0	0	0	0	0	0	0	0
Frozen Events	8	15	1	15	4	6	9	5
Tot. Time Frozen (m:s)	0:02:49.920000	0:02:30.920000	0:04:59.960000	0:02:52.600000	0:00:17.920000	0:01:26.440000	0:02:17.400000	0:02:13.320000
Avg. Time Frozen (m:s)	0:00:21.240000	0:00:10.061000	0:04:59.960000	0:00:11.507000	0:00:04.480000	0:00:14.407000	0:00:15.267000	0:00:26.664000
NC	Replicat
	1	2	3	4	5	6	7	8
Av. Speed (mm/s)	2.75706	31.7999	15.9594	0.474994	23.8226	0.779047	13.0704	25.4226
Mob. Av. Speed (mm/s)	7.57601	33.3843	20.6431	1.91827	24.636	3.51295	16.6891	27.3412
Av. Accel (mm/s^2)	8.41148	48.5911	22.8466	2.61699	36.4777	2.62928	24.9352	35.358
Mobility Rate (%)	0.348719	0.951974	0.768677	0.154216	0.964854	0.176628	0.778148	0.928629
Visible Frames	7500	7500	7500	7500	7174	7500	7500	7500
Visible Time (m:s)	0:05:00	0:05:00	0:05:00	0:05:00	0:04:46.960000	0:05:00	0:05:00	0:05:00
Invisible Frames	0	0	0	0	326	0	0	0
Invisible Time (m:s)	0:00:00	0:00:00	0:00:00	0:00:00	0:00:13.040000	0:00:00	0:00:00	0:00:00
First Visible Frame	7500	7500	7500	7500	7500	7500	7500	7500
Last Visible Frame	14999	14999	14999	14999	14999	14999	14999	14999
Visibility Rate (%)	1	1	1	1	0.956533	1	1	1
Invisibility Rate (%)	0	0	0	0	0.0434667	0	0	0
Explored Areas	4	4	6	2	4	4	4	4
Number of Areas	4	9	9	9	9	9	9	9
Exploration Rate (%)	1	0.444444	0.666667	0.222222	0.444444	0.444444	0.444444	0.444444
Total Distance (mm)	856.753	9572.75	4821.94	175.492	7180.34	261.783	3951.95	7657.15
Transitions In	0	0	0	0	0	0	0	0
Transitions Out	0	0	0	0	0	0	0	0
Frozen Events	12	1	3	5	0	5	4	2
Tot. Time Frozen (m:s)	0:03:27.760000	0:00:05.080000	0:00:43.800000	0:04:43.880000	0:00:00	0:04:27.480000	0:00:48.600000	0:00:09.480000
Avg. Time Frozen (m:s)	0:00:17.313000	0:00:05.080000	0:00:14.600000	0:00:56.776000	0:00:00	0:00:53.496000	0:00:12.150000	0:00:04.740000
PC	Replicat
	1	2	3	4	5	6	7	8
Av. Speed (mm/s)		0.09623				0.263126		1.42813
Mob. Av. Speed (mm/s)		1.06861				1.35766		3.09057
Av. Accel (mm/s^2)		0.600548				1.5219		5.56425
Mobility Rate (%)		0.00520277				0.0460245		0.421692
Visible Frames		7500				7500		7500
Visible Time (m:s)		0:05:00				0:05:00		0:05:00
Invisible Frames		0				0		0
Invisible Time (m:s)		0:00:00				0:00:00		0:00:00
First Visible Frame		7500				7500		7500
Last Visible Frame		14999				14999		14999
Visibility Rate (%)		1				1		1
Invisibility Rate (%)		0				0		0
Explored Areas		1				1		3
Number of Areas		9				9		9
Exploration Rate (%)		0.111111				0.111111		0.333333
Total Distance (mm)		45.3119				116.769		482.428
Transitions In		0				0		0
Transitions Out		0				0		0
Frozen Events		1				1		11
Tot. Time Frozen (m:s)		0:04:59.960000				0:04:59.960000		0:03:42.920000
Avg. Time Frozen (m:s)		0:04:59.960000				0:04:59.960000		0:00:20.265000
0.4 g/L	Replicat
	1	2	3	4	5	6	7	8		<95%
Av. Speed (mm/s)	4.74543	10.1829	28.8365	20.6838	20.1313	18.5646	3.66185	36.2152
Mob. Av. Speed (mm/s)	8.81281	16.6389	33.6893	23.2035	24.9274	19.7986	9.46052	36.2868
Av. Accel (mm/s^2)	10.7241	21.1504	46.0802	34.87	30.4214	37.0644	7.80317	59.2737
Mobility Rate (%)	0.508293	0.603522	0.851307	0.889808	0.794097	0.935779	0.375133	0.99794
Visible Frames	7299	7500	7348	7500	7119	7447	7500	7287
Visible Time (m:s)	0:04:51.960000	0:05:00	0:04:53.920000	0:05:00	0:04:44.760000	0:04:57.880000	0:05:00	0:04:51.480000
Invisible Frames	201	0	152	0	381	53	0	213
Invisible Time (m:s)	0:00:08.040000	0:00:00	0:00:06.080000	0:00:00	0:00:15.240000	0:00:02.120000	0:00:00	0:00:08.520000
First Visible Frame	7500	7500	7500	7500	7500	7500	7500	7500
Last Visible Frame	14999	14999	14999	14999	14999	14999	14999	14999
Visibility Rate (%)	0.9732	1	0.979733	1	0.9492	0.992933	1	0.9716
Invisibility Rate (%)	0.0268	0	0.0202667	0	0.0508	0.00706667	0	0.0284
Explored Areas	4	4	4	6	4	4	4	6
Number of Areas	9	9	9	9	6	9	9	9
Exploration Rate (%)	0.444444	0.444444	0.444444	0.666667	0.666667	0.444444	0.444444	0.666667
Total Distance (mm)	1471.04	3101.7	8703	6240.66	6084.61	5605.6	1128.85	10936.3
Transitions In	0	0	0	0	0	0	0	0
Transitions Out	0	0	0	0	0	0	0	0
Frozen Events	16	10	5	2	12	1	15	0
Tot. Time Frozen (m:s)	0:02:59.080000	0:02:12.520000	0:00:30	0:00:11.240000	0:01:06.720000	0:00:05.480000	0:03:28.480000	0:00:00
Avg. Time Frozen (m:s)	0:00:11.192000	0:00:13.252000	0:00:06	0:00:05.620000	0:00:05.560000	0:00:05.480000	0:00:13.899000	0:00:00
1 g/L	Replicat
	1	2	3	4	5	6	7	8
Av. Speed (mm/s)	0.975015	27.5687	7.07928	12.7944	4.85497	6.7773	13.7885	2.05547
Mob. Av. Speed (mm/s)	3.2387	31.3866	14.5669	16.8569	7.94849	11.8598	18.113	6.31217
Av. Accel (mm/s^2)	3.89331	55.5413	10.2772	31.0001	8.54737	14.5812	25.8187	7.45637
Mobility Rate (%)	0.246531	0.877801	0.476387	0.753602	0.593508	0.554178	0.756003	0.297492
Visible Frames	7500	7500	7500	7500	7367	7424	7500	7500
Visible Time (m:s)	0:05:00	0:05:00	0:05:00	0:05:00	0:04:54.680000	0:04:56.960000	0:05:00	0:05:00
Invisible Frames	0	0	0	0	133	76	0	0
Invisible Time (m:s)	0:00:00	0:00:00	0:00:00	0:00:00	0:00:05.320000	0:00:03.040000	0:00:00	0:00:00
First Visible Frame	7500	7500	7500	7500	7500	7500	7500	7500
Last Visible Frame	14999	14999	14999	14999	14999	14999	14999	14999
Visibility Rate (%)	1	1	1	1	0.982267	0.989867	1	1
Invisibility Rate (%)	0	0	0	0	0.0177333	0.0101333	0	0
Explored Areas	4	5	5	7	4	4	6	4
Number of Areas	9	9	9	9	9	9	9	9
Exploration Rate (%)	0.444444	0.555556	0.555556	0.777778	0.444444	0.444444	0.666667	0.444444
Total Distance (mm)	330.639	8320.34	2156.31	3885.47	1482.5	2069.48	4182.01	658.146
Transitions In	0	0	0	0	0	0	0	0
Transitions Out	0	0	0	0	0	0	0	0
Frozen Events	7	3	10	4	15	8	10	13
Tot. Time Frozen (m:s)	0:04:06.760000	0:00:39.120000	0:03:10.240000	0:00:48.520000	0:02:21.480000	0:02:24.400000	0:01:12.480000	0:04:05.480000
Avg. Time Frozen (m:s)	0:00:35.251000	0:00:13.040000	0:00:19.024000	0:00:12.130000	0:00:09.432000	0:00:18.050000	0:00:07.248000	0:00:18.883000
2.5 g/L	Replicat
	1	2	3	4	5	6	7	8
Av. Speed (mm/s)	21.8899	20.2668	0.217011	28.7633	16.0049	2.00774	19.9351	8.40644		<95% visibility
Mob. Av. Speed (mm/s)	26.1922	27.9958	1.2594	31.3882	19.2505	4.77273	21.5099	13.3787
Av. Accel (mm/s^2)	30.4436	27.6818	1.3087	52.4683	31.3833	6.24507	38.8775	16.0976
Mobility Rate (%)	0.811983	0.712282	0.0184098	0.915155	0.819443	0.381272	0.92516	0.617449
Visible Frames	6647	7275	7500	7500	7143	7458	7500	7420
Visible Time (m:s)	0:04:25.880000	0:04:51	0:05:00	0:05:00	0:04:45.720000	0:04:58.320000	0:05:00	0:04:56.800000
Invisible Frames	853	225	0	0	357	42	0	80
Invisible Time (m:s)	0:00:34.120000	0:00:09	0:00:00	0:00:00	0:00:14.280000	0:00:01.680000	0:00:00	0:00:03.200000
First Visible Frame	7500	7500	7500	7500	7500	7500	7500	7500
Last Visible Frame	14999	14999	14999	14999	14999	14999	14999	14999
Visibility Rate (%)	0.886267	0.97	1	1	0.9524	0.9944	1	0.989333
Invisibility Rate (%)	0.113733	0.03	0	0	0.0476	0.0056	0	0.0106667
Explored Areas	4	7	1	4	5	6	6	6
Number of Areas	4	9	9	9	9	9	9	9
Exploration Rate (%)	1	0.777778	0.111111	0.444444	0.555556	0.666667	0.666667	0.666667
Total Distance (mm)	6615.58	6138.15	94.6867	8684.18	4851.66	651.932	6009.66	2562.19
Transitions In	0	0	0	0	0	0	0	0
Transitions Out	0	0	0	0	0	0	0	0
Frozen Events	2	4	1	2	6	14	3	13
Tot. Time Frozen (m:s)	0:00:43.560000	0:01:20.920000	0:04:59.960000	0:00:21.800000	0:00:45.200000	0:03:50.800000	0:00:12.040000	0:02:26.760000
Avg. Time Frozen (m:s)	0:00:21.780000	0:00:20.230000	0:04:59.960000	0:00:10.900000	0:00:07.533000	0:00:16.486000	0:00:04.013000	0:00:11.289000
6.25 g/L	Replicat
	1	2	3	4	5	6	7	8
Av. Speed (mm/s)	7.39146	10.7096	1.56931	2.32548	0.191507	0.192288	11.2475	42.7716
Mob. Av. Speed (mm/s)	12.3176	11.8096	7.47106	7.03308	1.50489	1.61373	19.3968	47.8018
Av. Accel (mm/s^2)	15.2226	14.482	4.36913	5.93903	1.2299	1.2712	22.5308	47.8584
Mobility Rate (%)	0.584995	0.903015	0.185966	0.307364	0.0232124	0.0206777	0.574573	0.893943
Visible Frames	7428	7500	7500	7500	7500	7500	7500	7500
Visible Time (m:s)	0:04:57.120000	0:05:00	0:05:00	0:05:00	0:05:00	0:05:00	0:05:00	0:05:00
Invisible Frames	72	0	0	0	0	0	0	0
Invisible Time (m:s)	0:00:02.880000	0:00:00	0:00:00	0:00:00	0:00:00	0:00:00	0:00:00	0:00:00
First Visible Frame	7500	7500	7500	7500	7500	7500	7500	7500
Last Visible Frame	14999	14999	14999	14999	14999	14999	14999	14999
Visibility Rate (%)	0.9904	1	1	1	1	1	1	1
Invisibility Rate (%)	0.0096	0	0	0	0	0	0	0
Explored Areas	4	6	6	5	1	1	7	4
Number of Areas	9	9	9	9	9	9	9	9
Exploration Rate (%)	0.444444	0.666667	0.666667	0.555556	0.111111	0.111111	0.777778	0.444444
Total Distance (mm)	2254.72	3232.5	512.518	736.727	77.1905	78.0727	3406.61	12891.1
Transitions In	0	0	0	0	0	0	0	0
Transitions Out	0	0	0	0	0	0	0	0
Frozen Events	9	4	3	8	1	2	3	3
Tot. Time Frozen (m:s)	0:02:03.480000	0:00:17.560000	0:04:39.800000	0:04:06.360000	0:04:59.960000	0:04:59.920000	0:02:17.840000	0:00:20.240000
Avg. Time Frozen (m:s)	0:00:13.720000	0:00:04.390000	0:01:33.267000	0:00:30.795000	0:04:59.960000	0:02:29.960000	0:00:45.947000	0:00:06.747000
15.6 g/L	Replicat
	1	2	3	4	5	6	7	8
Av. Speed (mm/s)	17.2385	38.99	32.1919	11.5107	1.65001	23.1235	0.297777	13.9267
Mob. Av. Speed (mm/s)	19.8161	40.15	33.8506	16.0526	7.31118	25.1043	1.70463	15.4842
Av. Accel (mm/s^2)	27.4018	55.12	47.339	18.2841	4.18186	28.8045	1.70688	26.9671
Mobility Rate (%)	0.851073	0.9701	0.949443	0.71238	0.211046	0.916816	0.0636339	0.897145
Visible Frames	6665	7331	7362	7500	7500	7241	7500	7500
Visible Time (m:s)	0:04:26.600000	00:04:53.200000	0:04:54.480000	0:05:00	0:05:00	0:04:49.640000	0:05:00	0:05:00
Invisible Frames	835	169	138	0	0	259	0	0
Invisible Time (m:s)	0:00:33.400000	00:00:06.800000	0:00:05.520000	0:00:00	0:00:00	0:00:10.360000	0:00:00	0:00:00
First Visible Frame	7500	7500	7500	7500	7500	7500	7500	7500
Last Visible Frame	14999	14999	14999	14999	14999	14999	14999	14999
Visibility Rate (%)	0.888667	0.9775	0.9816	1	1	0.965467	1	1
Invisibility Rate (%)	0.111333	0.0225	0.0184	0	0	0.0345333	0	0
Explored Areas	6	4	4	4	4	4	2	4
Number of Areas	9	9	9	9	9	9	9	9
Exploration Rate (%)	0.666667	0.4444	0.444444	0.444444	0.444444	0.444444	0.222222	0.444444
Total Distance (mm)	5213.97	11748.8	9691.74	3491.83	513.996	6966.75	123.503	4214.41
Transitions In	0	0	0	0	0	0	0	0
Transitions Out	0	0	0	0	0	0	0	0
Frozen Events	7	1	1	11	6	3	3	1
Tot. Time Frozen (m:s)	0:00:36.080000	00:00:04.900000	0:00:03.480000	0:01:34.560000	0:04:12.200000	0:00:11.280000	0:04:54.840000	0:00:23.600000
Avg. Time Frozen (m:s)	0:00:05.154000	00:00:04.900000	0:00:03.480000	0:00:08.596000	0:00:42.033000	0:00:03.760000	0:01:38.280000	0:00:23.600000

## Sheet: Video_d7
SC	Replicat
	1	2	3	4	5	6	7	8
Av. Speed (mm/s)	12.2047	0.757982	33.536	3.90973	14.5494	15.9594	10.3311	2.78326
Mob. Av. Speed (mm/s)	16.3342	3.35382	34.5386	8.93577	18.4928	17.4777	10.9508	5.29097
Av. Accel (mm/s^2)	23.8229	2.7647	41.9066	10.4661	27.6307	29.1756	20.4362	8.07371
Mobility Rate (%)	0.725601	0.174226	0.970419	0.424957	0.774976	0.911019	0.940635	0.506537
Visible Frames	7074	7500	7475	7473	7261	7500	7500	7500
Visible Time (m:s)	0:04:42.960000	0:05:00	0:04:59	0:04:58.920000	0:04:50.440000	0:05:00	0:05:00	0:05:00
Invisible Frames	426	0	25	27	239	0	0	0
Invisible Time (m:s)	0:00:17.040000	0:00:00	0:00:01	0:00:01.080000	0:00:09.560000	0:00:00	0:00:00	0:00:00
First Visible Frame	7500	7500	7500	7500	7500	7500	7500	7500
Last Visible Frame	14999	14999	14999	14999	14999	14999	14999	14999
Visibility Rate (%)	0.9432	1	0.996667	0.9964	0.968133	1	1	1
Invisibility Rate (%)	0.0568	0	0.00333333	0.0036	0.0318667	0	0	0
Explored Areas	4	3	8	4	4	6	6	5
Number of Areas	4	9	9	9	9	9	9	9
Exploration Rate (%)	1	0.333333	0.888889	0.444444	0.444444	0.666667	0.666667	0.555556
Total Distance (mm)	3690.72	255.083	10110.8	1203.7	4405.39	4816.86	3126.85	876.767
Transitions In	0	0	0	0	0	0	0	0
Transitions Out	0	0	0	0	0	0	0	0
Frozen Events	8	5	0	8	9	4	1	14
Tot. Time Frozen (m:s)	0:00:55.680000	0:04:43.040000	0:00:00	0:02:49.760000	0:00:58.680000	0:00:17.040000	0:00:11.360000	0:02:56.160000
Avg. Time Frozen (m:s)	0:00:06.960000	0:00:56.608000	0:00:00	0:00:21.220000	0:00:06.520000	0:00:04.260000	0:00:11.360000	0:00:12.583000
NC	Replicat
	1	2	3	4	5	6	7	8
Av. Speed (mm/s)	19.932	30.9854	5.08784	14.5507	1.70053	0.653922	0.208862	15.7661
Mob. Av. Speed (mm/s)	22.2115	31.8512	8.00452	16.8169	5.04529	2.40393	1.94197	19.0281
Av. Accel (mm/s^2)	36.1021	42.9746	9.40599	22.1539	4.86507	3.07566	1.15872	23.9184
Mobility Rate (%)	0.890658	0.971833	0.618997	0.862009	0.298959	0.188767	0.0360192	0.82564
Visible Frames	7165	7353	7500	7461	7500	7500	7500	7500
Visible Time (m:s)	0:04:46.600000	0:04:54.120000	0:05:00	0:04:58.440000	0:05:00	0:05:00	0:05:00	0:05:00
Invisible Frames	335	147	0	39	0	0	0	0
Invisible Time (m:s)	0:00:13.400000	0:00:05.880000	0:00:00	0:00:01.560000	0:00:00	0:00:00	0:00:00	0:00:00
First Visible Frame	7500	7500	7500	7500	7500	7500	7500	7500
Last Visible Frame	14999	14999	14999	14999	14999	14999	14999	14999
Visibility Rate (%)	0.955333	0.9804	1	0.9948	1	1	1	1
Invisibility Rate (%)	0.0446667	0.0196	0	0.0052	0	0	0	0
Explored Areas	6	7	6	4	4	4	1	4
Number of Areas	9	9	9	9	9	9	9	9
Exploration Rate (%)	0.666667	0.777778	0.666667	0.444444	0.444444	0.444444	0.111111	0.444444
Total Distance (mm)	6009.88	9328	1566.82	4396.24	567.413	226.447	79.7977	4751.96
Transitions In	0	0	0	0	0	0	0	0
Transitions Out	0	0	0	0	0	0	0	0
Frozen Events	3	0	7	6	5	8	3	3
Tot. Time Frozen (m:s)	0:00:16.080000	0:00:00	0:02:01.880000	0:00:31.560000	0:03:43.040000	0:04:45.680000	0:04:57.400000	0:00:21.640000
Avg. Time Frozen (m:s)	0:00:05.360000	0:00:00	0:00:17.411000	0:00:05.260000	0:00:44.608000	0:00:35.710000	0:01:39.133000	0:00:07.213000
PC	Replicat
	1	2	3	4	5	6	7	8
Av. Speed (mm/s)
Mob. Av. Speed (mm/s)
Av. Accel (mm/s^2)
Mobility Rate (%)
Visible Frames
Visible Time (m:s)
Invisible Frames
Invisible Time (m:s)
First Visible Frame
Last Visible Frame
Visibility Rate (%)
Invisibility Rate (%)
Explored Areas
Number of Areas
Exploration Rate (%)
Total Distance (mm)
Transitions In
Transitions Out
Frozen Events
Tot. Time Frozen (m:s)
Avg. Time Frozen (m:s)
0.4 g/L	Replicat
	1	2	3	4	5	6	7	8
Av. Speed (mm/s)	1.30372	2.39955	18.0395	not traceable	21.3889	2.21726	2.56426	22.8545
Mob. Av. Speed (mm/s)	5.53937	7.54003	20.5468		25.7742	6.58483	5.44739	25.8099
Av. Accel (mm/s^2)	4.58659	7.19013	30.316		29.5647	5.99928	8.97908	32.2375
Mobility Rate (%)	0.199973	0.297359	0.875667		0.827775	0.314168	0.443303	0.883805
Visible Frames	7500	7500	7500		7500	7500	7500	7500
Visible Time (m:s)	0:05:00	0:05:00	0:05:00		0:05:00	0:05:00	0:05:00	0:05:00
Invisible Frames	0	0	0		0	0	0	0
Invisible Time (m:s)	0:00:00	0:00:00	0:00:00		0:00:00	0:00:00	0:00:00	0:00:00
First Visible Frame	7500	7500	7500		7500	7500	7500	7500
Last Visible Frame	14999	14999	14999		14999	14999	14999	14999
Visibility Rate (%)	1	1	1		1	1	1	1
Invisibility Rate (%)	0	0	0		0	0	0	0
Explored Areas	4	4	6		4	4	4	4
Number of Areas	9	9	9		6	9	9	9
Exploration Rate (%)	0.444444	0.444444	0.666667		0.666667	0.444444	0.444444	0.444444
Total Distance (mm)	427.41	754.581	5448.03		6445.87	699.278	816.457	6891.29
Transitions In	0	0	0		0	0	0	0
Transitions Out	0	0	0		0	0	0	0
Frozen Events	4	12	5		8	16	18	5
Tot. Time Frozen (m:s)	0:04:21.400000	0:03:59.120000	0:00:30.360000		0:01:00.760000	0:03:58.320000	0:03:17.920000	0:00:27.600000
Avg. Time Frozen (m:s)	0:01:05.350000	0:00:19.927000	0:00:06.072000		0:00:07.595000	0:00:14.895000	0:00:10.996000	0:00:05.520000
1 g/L	Replicat
	1	2	3	4	5	6	7	8
Av. Speed (mm/s)	14.3256	30.0775	24.7126	49.7441	15.5279	3.3788	10.874	2.03599
Mob. Av. Speed (mm/s)	18.4443	34.7893	27.0502	51.1559	19.9648	7.55751	17.4242	5.9996
Av. Accel (mm/s^2)	27.3005	37.5352	41.8122	64.7004	27.2752	8.27169	19.3353	5.94043
Mobility Rate (%)	0.764088	0.86296	0.91044	0.972252	0.77468	0.429562	0.616729	0.311099
Visible Frames	7244	7469	7284	7500	7500	7500	7500	7500
Visible Time (m:s)	0:04:49.760000	0:04:58.760000	0:04:51.360000	0:05:00	0:05:00	0:05:00	0:05:00	0:05:00
Invisible Frames	256	31	216	0	0	0	0	0
Invisible Time (m:s)	0:00:10.240000	0:00:01.240000	0:00:08.640000	0:00:00	0:00:00	0:00:00	0:00:00	0:00:00
First Visible Frame	7500	7500	7500	7500	7500	7500	7500	7500
Last Visible Frame	14999	14999	14999	14999	14999	14999	14999	14999
Visibility Rate (%)	0.965867	0.995867	0.9712	1	1	1	1	1
Invisibility Rate (%)	0.0341333	0.00413333	0.0288	0	0	0	0	0
Explored Areas	4	6	5	8	6	6	4	4
Number of Areas	9	9	9	9	9	9	9	9
Exploration Rate (%)	0.444444	0.666667	0.555556	0.888889	0.666667	0.666667	0.444444	0.444444
Total Distance (mm)	4362.34	9078.47	7467.81	14997.6	4698.87	1038.86	3293.93	643.122
Transitions In	0	0	0	0	0	0	0	0
Transitions Out	0	0	0	0	0	0	0	0
Frozen Events	5	4	2	1	2	9	15	13
Tot. Time Frozen (m:s)	0:00:36.680000	0:00:48	0:00:20.920000	0:00:04.600000	0:00:49.040000	0:02:43.440000	0:02:07.720000	0:04:04.360000
Avg. Time Frozen (m:s)	0:00:07.336000	0:00:12	0:00:10.460000	0:00:04.600000	0:00:24.520000	0:00:18.160000	0:00:08.515000	0:00:18.797000
2.5 g/L	Replicat
	1	2	3	4	5	6	7	8		<95%
Av. Speed (mm/s)	12.2671	19.5911	0.164287	6.69174	7.7674	10.3654	32.0865	2.22006
Mob. Av. Speed (mm/s)	14.1176	21.164	1.17441	9.57265	14.1625	15.202	34.2338	5.36068
Av. Accel (mm/s^2)	16.7606	26.5369	1.01441	12.549	16.7825	19.0262	40.8816	7.77359
Mobility Rate (%)	0.854239	0.924093	0.0150747	0.684765	0.539088	0.662602	0.935038	0.375
Visible Frames	6940	7500	7500	7500	7500	7221	7316	7500
Visible Time (m:s)	0:04:37.600000	0:05:00	0:05:00	0:05:00	0:05:00	0:04:48.840000	0:04:52.640000	0:05:00
Invisible Frames	560	0	0	0	0	279	184	0
Invisible Time (m:s)	0:00:22.400000	0:00:00	0:00:00	0:00:00	0:00:00	0:00:11.160000	0:00:07.360000	0:00:00
First Visible Frame	7500	7500	7500	7500	7500	7500	7500	7500
Last Visible Frame	14999	14999	14999	14999	14999	14999	14999	14999
Visibility Rate (%)	0.925333	1	1	1	1	0.9628	0.975467	1
Invisibility Rate (%)	0.0746667	0	0	0	0	0.0372	0.0245333	0
Explored Areas	4	4	1	4	4	4	7	6
Number of Areas	9	9	9	9	9	9	9	9
Exploration Rate (%)	0.444444	0.444444	0.111111	0.444444	0.444444	0.444444	0.777778	0.666667
Total Distance (mm)	3702.58	5909.23	79.0911	2048.89	2368.07	3142.48	9678.4	696.714
Transitions In	0	0	0	0	0	0	0	0
Transitions Out	0	0	0	0	0	0	0	0
Frozen Events	3	2	1	6	9	18	3	10
Tot. Time Frozen (m:s)	0:00:34.560000	0:00:11.800000	0:04:59.960000	0:01:42.640000	0:02:26.840000	0:01:49	0:00:15.920000	0:03:58.960000
Avg. Time Frozen (m:s)	0:00:11.520000	0:00:05.900000	0:04:59.960000	0:00:17.107000	0:00:16.316000	0:00:06.056000	0:00:05.307000	0:00:23.896000
6.25 g/L	Replicat
	1	2	3	4	5	6	7	8
Av. Speed (mm/s)	11.7724	3.87381	16.0767	9.88195	0.861461	1.33874	9.62263	13.146
Mob. Av. Speed (mm/s)	16.3937	6.34748	18.2962	11.0479	6.19686	4.30815	13.9517	19.5067
Av. Accel (mm/s^2)	20.2863	8.0385	27.1051	19.8529	3.24913	5.23901	21.0678	24.1515
Mobility Rate (%)	0.708934	0.574242	0.872506	0.889274	0.116462	0.276147	0.683031	0.668623
Visible Frames	7425	7163	7322	7500	7500	7500	7500	7500
Visible Time (m:s)	0:04:57	0:04:46.520000	0:04:52.880000	0:05:00	0:05:00	0:05:00	0:05:00	0:05:00
Invisible Frames	75	337	178	0	0	0	0	0
Invisible Time (m:s)	0:00:03	0:00:13.480000	0:00:07.120000	0:00:00	0:00:00	0:00:00	0:00:00	0:00:00
First Visible Frame	7500	7500	7500	7500	7500	7500	7500	7500
Last Visible Frame	14999	14999	14999	14999	14999	14999	14999	14999
Visibility Rate (%)	0.99	0.955067	0.976267	1	1	1	1	1
Invisibility Rate (%)	0.01	0.0449333	0.0237333	0	0	0	0	0
Explored Areas	4	4	4	8	4	5	6	6
Number of Areas	9	9	4	9	9	9	9	9
Exploration Rate (%)	0.444444	0.444444	1	0.888889	0.444444	0.555556	0.666667	0.666667
Total Distance (mm)	3570.25	1194.76	4887.69	3013.76	288.242	435.943	2923.17	3985.85
Transitions In	0	0	0	0	0	0	0	0
Transitions Out	0	0	0	0	0	0	0	0
Frozen Events	13	14	4	0	4	17	15	13
Tot. Time Frozen (m:s)	0:01:19.400000	0:02:23.520000	0:00:18.840000	0:00:00	0:04:42.680000	0:04:20.480000	0:01:58.120000	0:01:34.920000
Avg. Time Frozen (m:s)	0:00:06.108000	0:00:10.251000	0:00:04.710000	0:00:00	0:01:10.670000	0:00:15.322000	0:00:07.875000	0:00:07.302000
15.6 g/L	Replicat
	1	2	3	4	5	6	7	8
Av. Speed (mm/s)	11.4925	28.2427	23.7416	4.81309	0.106713	5.58997	9.93852	1.48858
Mob. Av. Speed (mm/s)	14.3108	30.6662	26.8692	8.60558	1.43123	10.0077	13.9685	3.03438
Av. Accel (mm/s^2)	16.6018	39.9255	40.0865	10.3762	0.679343	9.44427	18.9998	5.40852
Mobility Rate (%)	0.791223	0.919914	0.881804	0.536686	0.00813767	0.541298	0.704909	0.426761
Visible Frames	7227	7471	7500	7500	7500	7462	7500	7500
Visible Time (m:s)	0:04:49.080000	0:04:58.840000	0:05:00	0:05:00	0:05:00	0:04:58.480000	0:05:00	0:05:00
Invisible Frames	273	29	0	0	0	38	0	0
Invisible Time (m:s)	0:00:10.920000	0:00:01.160000	0:00:00	0:00:00	0:00:00	0:00:01.520000	0:00:00	0:00:00
First Visible Frame	7500	7500	7500	7500	7500	7500	7500	7500
Last Visible Frame	14999	14999	14999	14999	14999	14999	14999	14999
Visibility Rate (%)	0.9636	0.996133	1	1	1	0.994933	1	1
Invisibility Rate (%)	0.0364	0.00386667	0	0	0	0.00506667	0	0
Explored Areas	4	4	7	4	1	4	6	4
Number of Areas	9	9	9	9	9	9	9	9
Exploration Rate (%)	0.444444	0.444444	0.777778	0.444444	0.111111	0.444444	0.666667	0.444444
Total Distance (mm)	3473.8	8506.83	7159.05	1500.8	46.0084	1707.04	3022.94	493.514
Transitions In	0	0	0	0	0	0	0	0
Transitions Out	0	0	0	0	0	0	0	0
Frozen Events	4	2	4	16	1	13	5	15
Tot. Time Frozen (m:s)	0:00:52.880000	0:00:10.560000	0:00:17.360000	0:03:09.160000	0:04:59.960000	0:02:39.640000	0:01:29.080000	0:03:40.320000
Avg. Time Frozen (m:s)	0:00:13.220000	0:00:05.280000	0:00:04.340000	0:00:11.822000	0:04:59.960000	0:00:12.280000	0:00:17.816000	0:00:14.688000

## Sheet: Video_d14
SC	Replicat
	1	2	3	4	5	6	7	8
Av. Speed (mm/s)	20.8368	4.00872	0.992267	1.34716	26.6143	3.70279	1.86217	14.6707
Mob. Av. Speed (mm/s)	25.2824	7.52928	5.20402	5.15992	28.0018	6.34073	3.68685	18.262
Av. Accel (mm/s^2)	35.0811	8.10925	4.32432	3.85242	52.4147	7.66238	4.46735	25.5103
Mobility Rate (%)	0.820226	0.511606	0.134605	0.226788	0.947573	0.564301	0.44263	0.799626
Visible Frames	7430	7500	7500	7500	7195	7500	7473	7500
Visible Time (m:s)	0:04:57.200000	0:05:00	0:05:00	0:05:00	0:04:47.800000	0:05:00	0:04:58.920000	0:05:00
Invisible Frames	70	0	0	0	305	0	27	0
Invisible Time (m:s)	0:00:02.800000	0:00:00	0:00:00	0:00:00	0:00:12.200000	0:00:00	0:00:01.080000	0:00:00
First Visible Frame	7500	7500	7500	7500	7500	7500	7500	7500
Last Visible Frame	14999	14999	14999	14999	14999	14999	14999	14999
Visibility Rate (%)	0.990667	1	1	1	0.959333	1	0.9964	1
Invisibility Rate (%)	0.00933333	0	0	0	0.0406667	0	0.0036	0
Explored Areas	4	5	3	3	4	6	5	6
Number of Areas	9	9	9	9	9	9	9	9
Exploration Rate (%)	0.444444	0.555556	0.333333	0.333333	0.444444	0.666667	0.555556	0.666667
Total Distance (mm)	6283.15	1232.28	357.678	444.528	8042.32	1139.88	614.091	4428.47
Transitions In	0	0	0	0	0	0	0	0
Transitions Out	0	0	0	0	0	0	0	0
Frozen Events	6	16	5	4	1	17	12	7
Tot. Time Frozen (m:s)	0:00:49.400000	0:02:46.040000	0:04:36.920000	0:04:10.520000	0:00:05.320000	0:02:32.200000	0:03:33.160000	0:00:44.360000
Avg. Time Frozen (m:s)	0:00:08.233000	0:00:10.378000	0:00:55.384000	0:01:02.630000	0:00:05.320000	0:00:08.953000	0:00:17.763000	0:00:06.337000
NC	Replicat
	1	2	3	4	5	6	7	8
Av. Speed (mm/s)	11.3686	19.8256	24.1964	22.1933	16.3809	1.74865	0.430858	32.1801
Mob. Av. Speed (mm/s)	20.2483	22.0739	26.3296	24.6535	17.0261	3.82953	2.31287	34.8901
Av. Accel (mm/s^2)	27.1746	23.9828	35.9758	30.4019	24.5366	5.03396	2.07574	33.5788
Mobility Rate (%)	0.55603	0.892192	0.917689	0.897872	0.958879	0.401414	0.0825774	0.921558
Visible Frames	7500	7202	7500	7475	7105	7500	7500	7500
Visible Time (m:s)	0:05:00	0:04:48.080000	0:05:00	0:04:59	0:04:44.200000	0:05:00	0:05:00	0:05:00
Invisible Frames	0	298	0	25	395	0	0	0
Invisible Time (m:s)	0:00:00	0:00:11.920000	0:00:00	0:00:01	0:00:15.800000	0:00:00	0:00:00	0:00:00
First Visible Frame	7500	7500	7500	7500	7500	7500	7500	7500
Last Visible Frame	14999	14999	14999	14999	14999	14999	14999	14999
Visibility Rate (%)	1	0.960267	1	0.996667	0.947333	1	1	1
Invisibility Rate (%)	0	0.0397333	0	0.00333333	0.0526667	0	0	0
Explored Areas	4	6	4	4	4	4	1	6
Number of Areas	9	9	9	9	9	9	9	9
Exploration Rate (%)	0.444444	0.666667	0.444444	0.444444	0.444444	0.444444	0.111111	0.666667
Total Distance (mm)	3444.27	5965.18	7291.02	6693.56	4948.29	564.634	176.246	9682.89
Transitions In	0	0	0	0	0	0	0	0
Transitions Out	0	0	0	0	0	0	0	0
Frozen Events	16	3	2	5	0	13	3	2
Tot. Time Frozen (m:s)	0:02:10.640000	0:00:18.600000	0:00:08.640000	0:00:23.240000	0:00:00	0:03:37.880000	0:04:54.120000	0:00:19.480000
Avg. Time Frozen (m:s)	0:00:08.165000	0:00:06.200000	0:00:04.320000	0:00:04.648000	0:00:00	0:00:16.760000	0:01:38.040000	0:00:09.740000
PC	Replicat
	1	2	3	4	5	6	7	8
Av. Speed (mm/s)
Mob. Av. Speed (mm/s)
Av. Accel (mm/s^2)
Mobility Rate (%)
Visible Frames
Visible Time (m:s)
Invisible Frames
Invisible Time (m:s)
First Visible Frame
Last Visible Frame
Visibility Rate (%)
Invisibility Rate (%)
Explored Areas
Number of Areas
Exploration Rate (%)
Total Distance (mm)
Transitions In
Transitions Out
Frozen Events
Tot. Time Frozen (m:s)
Avg. Time Frozen (m:s)
0.4 g/L	Replicat
	1	2	3	4	5	6	7	8
Av. Speed (mm/s)	21.7453	0.735439	32.6226	7.79468	3.58314	28.7328	2.34762	10.1657
Mob. Av. Speed (mm/s)	24.2415	1.98869	34.6708	12.178	7.95602	29.3785	5.70625	15.9077
Av. Accel (mm/s^2)	39.5963	3.08636	58.0811	16.5357	8.25404	48.3247	6.16182	18.3756
Mobility Rate (%)	0.882869	0.241596	0.940101	0.629803	0.433031	0.976467	0.377935	0.631137
Visible Frames	6723	7500	7500	7500	7500	7143	7500	7500
Visible Time (m:s)	0:04:28.920000	0:05:00	0:05:00	0:05:00	0:05:00	0:04:45.720000	0:05:00	0:05:00
Invisible Frames	777	0	0	0	0	357	0	0
Invisible Time (m:s)	0:00:31.080000	0:00:00	0:00:00	0:00:00	0:00:00	0:00:14.280000	0:00:00	0:00:00
First Visible Frame	7500	7500	7500	7500	7500	7500	7500	7500
Last Visible Frame	14999	14999	14999	14999	14999	14999	14999	14999
Visibility Rate (%)	0.8964	1	1	1	1	0.9524	1	1
Invisibility Rate (%)	0.1036	0	0	0	0	0.0476	0	0
Explored Areas	4	3	7	4	4	4	4	4
Number of Areas	9	9	9	9	9	9	9	9
Exploration Rate (%)	0.444444	0.333333	0.777778	0.444444	0.444444	0.444444	0.444444	0.444444
Total Distance (mm)	6595.38	266.45	9832.43	2376.37	1101.96	8685.66	742.912	3085.57
Transitions In	0	0	0	0	0	0	0	0
Transitions Out	0	0	0	0	0	0	0	0
Frozen Events	2	8	1	13	18	0	15	5
Tot. Time Frozen (m:s)	0:00:10.560000	0:04:21.880000	0:00:04.080000	0:01:51.520000	0:03:10.080000	0:00:00	0:03:50.240000	0:01:56.160000
Avg. Time Frozen (m:s)	0:00:05.280000	0:00:32.735000	0:00:04.080000	0:00:08.578000	0:00:10.560000	0:00:00	0:00:15.349000	0:00:23.232000
1 g/L	Replicat
	1	2	3	4	5	6	7	8
Av. Speed (mm/s)	14.1507	37.0843	28.592	45.2407	1.68836	1.58159	8.48883	1.80766
Mob. Av. Speed (mm/s)	17.9515	37.783	31.479	46.6761	3.90752	5.78368	14.7886	5.40648
Av. Accel (mm/s^2)	25.6365	60.5022	35.9813	46.0344	4.7592	5.40971	16.9967	5.95716
Mobility Rate (%)	0.779794	0.981165	0.906552	0.968444	0.392609	0.242129	0.564835	0.302962
Visible Frames	7388	7437	7452	7356	7500	7500	7500	7500
Visible Time (m:s)	0:04:55.520000	0:04:57.480000	0:04:58.080000	0:04:54.240000	0:05:00	0:05:00	0:05:00	0:05:00
Invisible Frames	112	63	48	144	0	0	0	0
Invisible Time (m:s)	0:00:04.480000	0:00:02.520000	0:00:01.920000	0:00:05.760000	0:00:00	0:00:00	0:00:00	0:00:00
First Visible Frame	7500	7500	7500	7500	7500	7500	7500	7500
Last Visible Frame	14999	14999	14999	14999	14999	14999	14999	14999
Visibility Rate (%)	0.985067	0.9916	0.9936	0.9808	1	1	1	1
Invisibility Rate (%)	0.0149333	0.0084	0.0064	0.0192	0	0	0	0
Explored Areas	6	6	6	8	5	4	6	4
Number of Areas	9	9	9	9	9	9	9	9
Exploration Rate (%)	0.666667	0.666667	0.666667	0.888889	0.555556	0.444444	0.666667	0.444444
Total Distance (mm)	4298.33	11184.5	8619.84	13624.4	554.998	504.626	2578.38	571.524
Transitions In	0	0	0	0	0	0	0	0
Transitions Out	0	0	0	0	0	0	0	0
Frozen Events	6	1	5	1	16	11	15	13
Tot. Time Frozen (m:s)	0:00:31.240000	0:00:05.040000	0:00:25.080000	0:00:08.960000	0:03:39.840000	0:03:52.160000	0:02:18.200000	0:03:48
Avg. Time Frozen (m:s)	0:00:05.207000	0:00:05.040000	0:00:05.016000	0:00:08.960000	0:00:13.740000	0:00:21.105000	0:00:09.213000	0:00:17.538000
2.5 g/L	Replicat
	1	2	3	4	5	6	7	8
Av. Speed (mm/s)	4.91747	41.7253	0.710416	21.6807	0.915705	11.1828	17.0113	2.04874
Mob. Av. Speed (mm/s)	9.21885	43.0941	2.31913	22.1276	5.14188	16.3366	19.5845	5.49084
Av. Accel (mm/s^2)	9.52113	50.0655	3.23751	41.6306	3.61614	21.3415	31.2322	5.72827
Mobility Rate (%)	0.515357	0.966565	0.217183	0.979322	0.146211	0.671941	0.865261	0.354055
Visible Frames	7395	7212	7500	7500	7500	7335	7500	7500
Visible Time (m:s)	0:04:55.800000	0:04:48.480000	0:05:00	0:05:00	0:05:00	0:04:53.400000	0:05:00	0:05:00
Invisible Frames	105	288	0	0	0	165	0	0
Invisible Time (m:s)	0:00:04.200000	0:00:11.520000	0:00:00	0:00:00	0:00:00	0:00:06.600000	0:00:00	0:00:00
First Visible Frame	7500	7500	7500	7500	7500	7500	7500	7500
Last Visible Frame	14999	14999	14999	14999	14999	14999	14999	14999
Visibility Rate (%)	0.986	0.9616	1	1	1	0.978	1	1
Invisibility Rate (%)	0.014	0.0384	0	0	0	0.022	0	0
Explored Areas	4	4	3	4	3	4	6	4
Number of Areas	9	9	9	9	9	9	9	9
Exploration Rate (%)	0.444444	0.444444	0.333333	0.444444	0.333333	0.444444	0.666667	0.444444
Total Distance (mm)	1521.05	12580.1	249.591	6532.75	300.369	3397.46	5130.23	648.592
Transitions In	0	0	0	0	0	0	0	0
Transitions Out	0	0	0	0	0	0	0	0
Frozen Events	14	1	8	0	7	13	5	11
Tot. Time Frozen (m:s)	0:02:45.760000	0:00:03.320000	0:04:42.800000	0:00:00	0:04:31.160000	0:01:39.920000	0:00:34.080000	0:03:42.080000
Avg. Time Frozen (m:s)	0:00:11.840000	0:00:03.320000	0:00:35.350000	0:00:00	0:00:38.737000	0:00:07.686000	0:00:06.816000	0:00:20.189000
6.25 g/L	Replicat
	1	2	3	4	5	6	7	8
Av. Speed (mm/s)	8.40559	3.22816	31.4923	4.93961	4.05019	11.1592	26.645	27.6301
Mob. Av. Speed (mm/s)	14.6688	5.18316	34.5456	9.99257	7.91984	18.1933	27.1562	29.6894
Av. Accel (mm/s^2)	14.1228	7.48012	48.9429	7.50231	8.30707	21.5866	48.9761	50.5523
Mobility Rate (%)	0.564835	0.597252	0.909836	0.472252	0.493597	0.605143	0.98079	0.929429
Visible Frames	7500	7500	7446	7500	7500	7470	7500	7500
Visible Time (m:s)	0:05:00	0:05:00	0:04:57.840000	0:05:00	0:05:00	0:04:58.800000	0:05:00	0:05:00
Invisible Frames	0	0	54	0	0	30	0	0
Invisible Time (m:s)	0:00:00	0:00:00	0:00:02.160000	0:00:00	0:00:00	0:00:01.200000	0:00:00	0:00:00
First Visible Frame	7500	7500	7500	7500	7500	7500	7500	7500
Last Visible Frame	14999	14999	14999	14999	14999	14999	14999	14999
Visibility Rate (%)	1	1	0.9928	1	1	0.996	1	1
Invisibility Rate (%)	0	0	0.0072	0	0	0.004	0	0
Explored Areas	4	5	6	6	4	5	6	4
Number of Areas	9	9	9	9	9	9	9	9
Exploration Rate (%)	0.444444	0.555556	0.666667	0.666667	0.444444	0.555556	0.666667	0.444444
Total Distance (mm)	2559.23	1015.45	9486.87	1538.49	1244.34	3386.05	8028.57	8355.91
Transitions In	0	0	0	0	0	0	0	0
Transitions Out	0	0	0	0	0	0	0	0
Frozen Events	13	13	4	14	24	15	0	0
Tot. Time Frozen (m:s)	0:02:33.080000	0:02:10.760000	0:00:20.600000	0:03:19.760000	0:03:04.960000	0:01:53.520000	0:00:00	0:00:00
Avg. Time Frozen (m:s)	0:00:11.775000	0:00:10.058000	0:00:05.150000	0:00:14.269000	0:00:07.707000	0:00:07.568000	0:00:00	0:00:00
15.6 g/L	Replicat
	1	2	3	4	5	6	7	8
Av. Speed (mm/s)	5.25815	2.65816	10.8629	7.7515	7.79056	13.9106	11.9243	21.8044
Mob. Av. Speed (mm/s)	7.89069	7.55808	14.2389	11.3525	11.706	18.4965	15.7804	22.8148
Av. Accel (mm/s^2)	10.0569	5.2527	19.4035	14.2035	16.4106	17.6089	27.4404	34.4594
Mobility Rate (%)	0.654482	0.325774	0.755203	0.670358	0.651281	0.748266	0.749466	0.953987
Visible Frames	7500	7500	7500	7500	7500	7500	7500	7415
Visible Time (m:s)	0:05:00	0:05:00	0:05:00	0:05:00	0:05:00	0:05:00	0:05:00	0:04:56.600000
Invisible Frames	0	0	0	0	0	0	0	85
Invisible Time (m:s)	0:00:00	0:00:00	0:00:00	0:00:00	0:00:00	0:00:00	0:00:00	0:00:03.400000
First Visible Frame	7500	7500	7500	7500	7500	7500	7500	7500
Last Visible Frame	14999	14999	14999	14999	14999	14999	14999	14999
Visibility Rate (%)	1	1	1	1	1	1	1	0.988667
Invisibility Rate (%)	0	0	0	0	0	0	0	0.0113333
Explored Areas	4	6	6	7	4	6	6	6
Number of Areas	9	9	9	9	9	9	9	9
Exploration Rate (%)	0.444444	0.666667	0.666667	0.777778	0.444444	0.666667	0.666667	0.666667
Total Distance (mm)	1612.78	832.503	3299.59	2368.94	2403.68	4194.42	3621.55	6590.45
Transitions In	0	0	0	0	0	0	0	0
Transitions Out	0	0	0	0	0	0	0	0
Frozen Events	9	8	10	12	8	6	6	2
Tot. Time Frozen (m:s)	0:01:52.600000	0:03:52.640000	0:01:26.080000	0:01:48.640000	0:02:23.320000	0:01:20.920000	0:01:05.920000	0:00:08.240000
Avg. Time Frozen (m:s)	0:00:12.511000	0:00:29.080000	0:00:08.608000	0:00:09.053000	0:00:17.915000	0:00:13.487000	0:00:10.987000	0:00:04.120000
