# Supplementary material for: Locomotor behavior of Neocaridina palmata: a study with leachates from UV-weathered microplastics
Source: PeerJ. 2021 Nov 9;9:e12442. doi: 10.7717/peerj.12442 (PMC8588861; doi:10.7717/peerj.12442)
Supplement: Supplemental Information 3 — Raw measurements of water parameters, room temperature and humidity, mortality, molting and all analyzed video parameters of the freshwater shrimps on days 1, 3, 7, and 14 in the test with recycled LDPE after UV-A/B irradiation. [file peerj-09-12442-s003.xlsx]

## Sheet: timetable
	day	-1	0	1	2	3	4	5	6	7	8	9	10	11	12	13	14
	datum	2019-10-15	2019-10-16	2019-10-17	2019-10-18	2019-10-19	2019-10-20	2019-10-21	2019-10-22	2019-10-23	2019-10-24	2019-10-25	2019-10-26	2019-10-27	2019-10-28	2019-10-29	2019-10-30
	to do	Preparations	start of test														end of test
			Feeding
				mortality/ecdysis control
				video		video				video							video
							water exchange				water exchange				water exchange
			Water parameters														Water parameters
											Ammonium						Ammonium

## Sheet: water parameter
		pH	conductivity	oxygen		temperature	CaCO3			ammonium
			[µS/cm]	[mg/L]	[%]	[°C]	[°d]	[mmol/L]	[mg/L]	[mg/L]
Test start	medium	7.68	477	8.71	105	23.8	3.4	1.2	73.224	0
day 8	NC	7.61	527	8.31	101.1	24.1	4	1.4	85.428	0.8
	PC	7.82	8730	7.65	94.1	24.6	4.1	1.5	91.53	1
	blank	7.57	539	8.06	98	24.1	4	1.4	85.428	0.3
	0,4 g/L	7.62	535	8.14	98.9	24	4.2	1.6	97.632	0.6
	1 g/L	7.61	528	8.07	98.1	24	4.1	1.5	91.53	1
	2,5 g/L	7.63	536	8.18	99.5	24	4	1.4	85.428	0.8
	6,25 g/L	7.67	559	8.21	99.7	23.9	4.2	1.6	97.632	0.8
	15,6 g/L	7.58	516	8.13	98.9	24	4.1	1.5	91.53	0.8
end of test	NC	7.62	498	8.47	100.1	23.3	3.8	1.4	85.428	0.5
	blank	7.51	480	8.28	97.8	23.2	3.4	1.2	73.224	0.15
	0,4 g/L	7.61	495	8.37	98.9	23.3	3.8	1.4	85.428	0.4
	1 g/L	7.63	499	8.32	98.4	23.3	4	1.5	91.53	0.5
	2,5 g/L	7.59	512	8.27	97.8	23.3	4	1.5	91.53	0.5
	6,25 g/L	7.62	494	8.36	98.7	23.3	3.8	1.4	85.428	0.4
	15,6 g/L	7.69	500	8.37	99.2	23.4	4	1.5	91.53	0.15
mean		7.62875	513	8.24375	99.0125	23.725	3.93125	1.4375	87.7162	0.54375
SD		0.0648917	22.9434	0.219598	2.11509	0.408503	0.23377	0.111102	6.77947	0.295209

## Sheet: mortality
Treatment		dead individuals on day
		1	2	3	4	5	6	7	8	9	10	11	12	13	14		1 = dead
NC	1	0	0	0	0	0	0	0	0	0	0	0	0	0	0		0 = abnormal behavior (e.g. back position)
	2	0	0	0	0	0	0	0	0	0	0	0	0	0	0		0 = normal
	3	0	0	0	0	0	0	0	0	0	0	0	0	0	0
	4	0	0	0	0	0	0	0	0	0	0	0	0	0	0
	5	0	0	0	0	0	0	0	0	0	0	0	0	0	0
	6	0	0	0	0	0	0	0	0	0	0	0	0	0	0
	7	0	0	0	0	0	0	0	0	0	0	0	0	0	0
	8	0	0	0	0	0	0	0	0	0	0	0	0	0	0
PC	1	1	1	1	1	1	1	1	1	1	1	1	1	1	1
	2	1	1	1	1	1	1	1	1	1	1	1	1	1	1
	3	1	1	1	1	1	1	1	1	1	1	1	1	1	1
	4	0	1	1	1	1	1	1	1	1	1	1	1	1	1
	5	1	1	1	1	1	1	1	1	1	1	1	1	1	1
	6	0	0	0	0	1	1	1	1	1	1	1	1	1	1
	7	0	0	0	0	0	0	1	1	1	1	1	1	1	1
	8	0	1	1	1	1	1	1	1	1	1	1	1	1	1
SC	1	0	0	0	0	0	0	0	0	0	0	0	0	0	0
	2	0	0	0	0	0	0	0	0	0	0	0	0	0	0
	3	0	0	0	0	0	0	0	0	0	0	0	0	0	0
	4	0	0	0	0	0	0	0	0	0	0	0	0	0	0
	5	0	0	0	0	0	0	0	0	0	0	0	0	0	0
	6	0	0	0	0	0	0	0	0	0	0	0	0	0	0
	7	0	0	0	0	0	0	0	0	0	0	0	0	0	0
	8	0	0	0	0	0	0	0	0	0	0	0	0	0	0
0.4 g/L	1	0	0	0	0	0	0	0	0	0	0	0	0	0	0
	2	0	0	0	0	0	0	0	0	0	0	0	0	0	0
	3	0	0	0	0	0	0	0	0	0	0	0	0	0	0
	4	0	0	0	0	0	0	0	0	0	0	0	0	0	0
	5	0	0	0	0	0	0	0	0	0	0	0	0	0	0
	6	0	0	0	0	0	0	0	0	0	0	0	0	0	0
	7	0	0	0	0	0	0	0	0	0	0	0	0	0	0
	8	0	0	0	0	0	0	0	0	0	0	0	0	0	0
1 g/L	1	0	0	0	0	0	0	0	0	0	0	0	0	0	0
	2	0	0	0	0	0	0	0	0	0	0	0	0	0	0
	3	0	0	0	0	0	0	0	0	0	0	0	0	0	0
	4	0	0	0	0	0	0	0	0	0	0	0	0	0	0
	5	0	0	0	0	0	0	0	0	0	1	1	1	1	1
	6	0	0	0	0	0	0	0	0	0	0	0	0	0	0
	7	0	0	0	0	0	0	0	0	0	0	0	0	0	0
	8	0	0	0	0	0	0	0	0	0	0	0	0	0	0
2.5 g/L	1	0	0	0	0	0	0	0	0	0	0	0	0	0	0
	2	0	0	0	0	0	0	0	0	0	0	0	0	0	0
	3	0	0	0	0	0	0	0	0	0	0	0	0	0	0
	4	0	0	0	0	0	0	0	0	0	0	0	0	0	0
	5	0	0	0	0	0	0	0	0	0	0	0	0	0	0
	6	0	0	0	0	0	0	0	0	0	0	0	0	0	0
	7	0	0	0	0	0	0	0	0	0	0	0	0	0	0
	8	0	0	0	0	0	0	0	0	0	0	0	0	0	0
6.25 g/L	1	0	0	0	0	0	0	0	0	0	0	0	0	0	0
	2	0	0	0	0	0	0	0	0	0	0	0	0	0	0
	3	0	0	0	0	0	0	0	0	0	0	0	0	0	0
	4	0	0	0	0	0	0	0	0	0	0	0	0	0	0
	5	0	0	0	0	0	0	0	0	0	0	0	0	0	0
	6	0	0	0	0	0	0	0	0	0	0	0	0	0	0
	7	0	0	0	0	0	0	0	0	0	0	0	0	0	0
	8	0	0	0	0	0	0	0	0	0	0	0	0	0	0
15.6 g/L	1	0	0	0	0	0	0	0	0	0	0	0	0	0	0
	2	0	0	0	0	0	0	0	0	0	0	0	0	0	0
	3	0	0	0	0	0	0	0	0	0	0	0	0	0	0
	4	0	0	0	0	0	0	0	0	0	0	0	0	0	0
	5	0	0	0	0	0	0	0	0	0	0	0	0	0	0
	6	0	0	0	0	0	0	0	0	0	0	0	0	0	0
	7	0	0	0	0	0	0	0	0	0	0	0	0	0	0
	8	0	0	0	0	0	0	0	0	0	0	0	0	0	0

## Sheet: ecdysis
Treatment		ecdysis on day														no. of ecdysis			inter-molt-period [d]
		1	2	3	4	5	6	7	8	9	10	11	12	13	14		mean	SD
NC	1	0	0	0	0	0	0	0	0	1	0	0	0	0	0	1	1.125	0.599479			1 = new exuviae found
	2	0	0	0	0	0	0	1	0	0	0	0	0	0	0	1					0 = no new exuviae
	3	0	0	0	0	0	0	0	1	0	0	0	0	0	0	1
	4	0	0	0	0	0	0	0	0	0	0	0	0	0	0	0
	5	0	0	1	0	0	0	0	0	0	0	0	1	0	0	2			9
	6	0	0	0	0	0	0	0	0	1	0	0	0	0	0	1
	7	1	0	0	0	0	0	0	0	0	1	0	0	0	0	2			9
	8	0	0	0	0	0	0	0	0	1	0	0	0	0	0	1
PC	1															0	0.25	0.433013
	2															0
	3															0
	4	1														1
	5															0
	6	0	0	0	0											0
	7	0	0	0	0	0	0									0
	8	0	1													1
SC	1	0	0	0	1	0	0	0	0	0	0	0	0	1	0	2	1.5	0.5	9
	2	0	0	0	0	0	0	0	1	0	0	0	0	0	0	1
	3	0	0	0	0	1	0	0	0	0	0	0	0	0	1	2			9
	4	0	0	0	0	0	1	0	0	0	0	0	0	0	0	1
	5	0	0	0	0	0	0	0	0	0	1	0	0	0	0	1
	6	0	0	0	0	0	0	0	1	0	0	0	0	0	0	1
	7	1	0	0	0	0	0	0	1	0	0	0	0	0	0	2			7
	8	0	0	0	0	0	1	0	0	0	0	0	0	0	1	2			8
0.4 g/L	1	0	0	0	1	0	0	0	0	0	0	1	0	0	0	2	1.5	0.5	7
	2	0	1	0	0	0	0	0	0	0	0	1	0	0	0	2			9
	3	0	0	0	0	0	1	0	0	0	0	0	0	0	0	1
	4	0	0	0	0	0	0	1	0	0	0	0	0	0	0	1
	5	0	0	0	0	0	0	0	0	1	0	0	0	0	0	1
	6	0	0	0	1	0	0	0	0	0	0	0	0	0	1	2			10
	7	0	0	0	0	0	0	0	0	0	0	0	0	0	1	1
	8	0	1	0	0	0	0	0	0	0	0	0	1	0	0	2			10
1 g/L	1	0	0	1	0	0	0	0	0	0	0	0	0	1	0	2	1.875	0.330719	10
	2	0	0	0	0	0	1	0	0	0	0	0	0	0	1	2			8
	3	1	0	0	0	0	0	0	0	1	0	0	0	0	0	2			8
	4	0	1	0	0	0	0	0	0	0	0	1	0	0	0	2			9
	5	0	0	0	0	1	0	0	0	0	0					1
	6	0	1	0	0	0	0	0	0	0	0	0	1	0	0	2			10
	7	0	0	0	0	1	0	0	0	0	0	0	0	1	0	2			8
	8	0	0	1	0	0	0	0	0	0	0	0	1	0	0	2			9
2.5 g/L	1	0	0	0	0	0	0	0	1	0	0	0	0	0	0	1	1.25	0.433013
	2	1	0	0	0	0	0	0	0	0	0	0	1	0	0	2			11
	3	0	0	0	0	0	0	1	0	0	0	0	0	0	0	1
	4	0	0	0	0	0	0	0	1	0	0	0	0	0	0	1
	5	0	0	0	0	0	0	0	0	0	0	0	0	1	0	1
	6	0	0	0	0	0	1	0	0	0	0	0	0	0	0	1
	7	0	0	0	0	0	1	0	0	0	0	0	0	0	1	2			8
	8	0	0	0	0	0	0	0	0	0	0	1	0	0	0	1
6.25 g/L	1	0	1	0	0	0	0	0	0	0	0	0	1	0	0	2	1.5	0.5	10
	2	1	0	0	0	0	0	0	0	1	0	0	0	0	0	2			8
	3	0	0	0	0	0	0	0	0	0	1	0	0	0	0	1
	4	1	0	0	0	0	0	0	0	0	1	0	0	0	0	2			9
	5	0	0	0	0	0	0	1	0	0	0	0	0	0	0	1
	6	0	0	0	0	0	0	0	0	1	0	0	0	0	0	1
	7	0	0	0	1	0	0	0	0	0	0	0	0	0	1	2			10
	8	0	0	0	0	0	1	0	0	0	0	0	0	0	0	1
15.6 g/L	1	0	0	0	0	0	0	0	0	1	0	0	0	0	0	1	1.375	0.484123
	2	0	0	0	1	0	0	0	0	0	0	0	0	1	0	2			9
	3	0	0	0	0	0	1	0	0	0	0	0	0	0	0	1
	4	0	0	0	0	0	0	0	0	1	0	0	0	0	0	1
	5	1	0	0	0	0	0	0	0	0	1	0	0	0	0	2			9
	6	0	0	0	0	0	0	1	0	0	0	0	0	0	0	1
	7	0	1	0	0	0	0	0	0	0	0	1	0	0	0	2			9
	8	0	0	0	0	1	0	0	0	0	0	0	0	0	0	1
															Mean	1.44643
															SD	0.531831

## Sheet: body parameter
Treatment		sex	body length	carapax length
		(0=f, 1=m)	[mm]	[mm]		12.4646
NC	1	0	12.7	5.43		0.98872
	2	1	11.62	4.76
	3	1	11.68	4.64
	4	1	13.42	5.36
	5	1	12.78	5.11
	6	1	12.35	5.35
	7	1	13.61	5.72
	8	1	13.42	5.5
PC	1
	2
	3
	4
	5
	6	0	12.16	4.63
	7	0	12.68	5.14
	8
SC	1	1	12.42	5.31
	2	1	11.09	5.08
	3	1	13.56	6.05
	4	1	11.29	4.21
	5	0	14.34	5.88
	6	1	11.15	4.9
	7	1	11.45	5.12
	8	0	13.19	5.67
0.4 g/L	1	1	12.77	5.51
	2	0	15.15	6.65
	3	0	12.45	5.41
	4	0	13.19	5.61
	5	0	13.56	5.74
	6	1	12.89	5.2
	7	0	12.71	5.47
	8	1	12.28	4.65
1 g/L	1	1	11.37	4.77
	2	1	11.66	4.68
	3	0	12.98	5.22
	4	0	13.02	5.63
	5	1	10.51	4.88		already partly rotted
	6	0	12.49	4.81
	7	1	12.12	4.69
	8	1	12.61	5.2
2.5 g/L	1	0	11.33	4.82
	2	0	13.65	5.81
	3	0	12.28	5.24
	4	1	11.33	4.8
	5	1	12.78	5.14
	6	0	11.81	4.97
	7	0	12.92	5.4
	8	0	11.91	5.07
6.25 g/L	1	0	13.83	5.86
	2	1	12.21	5.11
	3	0	11.51	4.73
	4	0	13.09	5.51
	5	1	11.32	4.9
	6	0	12.27	5.19
	7	1	12.04	4.94
	8	0	13.41	5.63
15.6 g/L	1	0	13.47	5.79
	2	1	11.58	4.81
	3	0	12.43	5.28
	4	1	11.25	4.55
	5	0	10.53	4.31
	6	1	12.07	5.11
	7	1	12.41	5.16
	8	0	14.76	6.29
Prozent Männchen		51.7241	12.4631
Prozent Weibchen		48.2759	0.972757
T0	1	1	13.06	5.49
	2	0	14.49	6.43
	3	1	13.08	5.47
	4	1	14.1	6.31
	5	1	13.31	5.76
	6	0	11.1	4.63
	7	0	14.05	6.2
	8	1	11.92	4.95
	9	0	13.72	6.1
	10	1	11.75	5.39

## Sheet: room temperature
Date Time, GMT+02:00	Temp, °C	RH, %
10/16/2019 08:12:22 am	25.416	10.8			Temp, °C	RH, %
10/16/2019 08:27:22 am	25.513	10.8		Mean	25.3887	14.7603
10/16/2019 08:42:22 am	25.416	10.8		SD	0.111213	8.14813
10/16/2019 08:57:22 am	25.416	10.8		Min	25.125	0
10/16/2019 09:12:22 am	25.416	10.8		Max	25.708	32.3
10/16/2019 09:27:22 am	25.416	21.5
10/16/2019 09:42:22 am	25.513	10.8
10/16/2019 09:57:22 am	25.513	21.5
10/16/2019 10:12:22 am	25.513	21.5
10/16/2019 10:27:22 am	25.61	10.8
10/16/2019 10:42:22 am	25.61	10.8
10/16/2019 10:57:22 am	25.61	10.8
10/16/2019 11:12:22 am	25.61	10.8
10/16/2019 11:27:22 am	25.61	10.8
10/16/2019 11:42:22 am	25.513	10.8
10/16/2019 11:57:22 am	25.513	10.8
10/16/2019 12:12:22 pm	25.513	10.8
10/16/2019 12:27:22 pm	25.416	10.8
10/16/2019 12:42:22 pm	25.416	10.8
10/16/2019 12:57:22 pm	25.416	10.8
10/16/2019 01:12:22 pm	25.416	10.8
10/16/2019 01:27:22 pm	25.513	10.8
10/16/2019 01:42:22 pm	25.513	10.8
10/16/2019 01:57:22 pm	25.513	10.8
10/16/2019 02:12:22 pm	25.513	10.8
10/16/2019 02:27:22 pm	25.513	10.8
10/16/2019 02:42:22 pm	25.513	10.8
10/16/2019 02:57:22 pm	25.513	10.8
10/16/2019 03:12:22 pm	25.513	10.8
10/16/2019 03:27:22 pm	25.513	10.8
10/16/2019 03:42:22 pm	25.513	10.8
10/16/2019 03:57:22 pm	25.513	10.8
10/16/2019 04:12:22 pm	25.513	10.8
10/16/2019 04:27:22 pm	25.513	10.8
10/16/2019 04:42:22 pm	25.513	10.8
10/16/2019 04:57:22 pm	25.513	10.8
10/16/2019 05:12:22 pm	25.513	10.8
10/16/2019 05:27:22 pm	25.513	10.8
10/16/2019 05:42:22 pm	25.513	10.8
10/16/2019 05:57:22 pm	25.513	10.8
10/16/2019 06:12:22 pm	25.513	10.8
10/16/2019 06:27:22 pm	25.513	10.8
10/16/2019 06:42:22 pm	25.513	10.8
10/16/2019 06:57:22 pm	25.513	10.8
10/16/2019 07:12:22 pm	25.513	10.8
10/16/2019 07:27:22 pm	25.513	10.8
10/16/2019 07:42:22 pm	25.513	10.8
10/16/2019 07:57:22 pm	25.513	10.8
10/16/2019 08:12:22 pm	25.513	10.8
10/16/2019 08:27:22 pm	25.513	10.8
10/16/2019 08:42:22 pm	25.416	10.8
10/16/2019 08:57:22 pm	25.513	10.8
10/16/2019 09:12:22 pm	25.513	10.8
10/16/2019 09:27:22 pm	25.513	10.8
10/16/2019 09:42:22 pm	25.513	10.8
10/16/2019 09:57:22 pm	25.513	10.8
10/16/2019 10:12:22 pm	25.416	10.8
10/16/2019 10:27:22 pm	25.416	10.8
10/16/2019 10:42:22 pm	25.319	10.8
10/16/2019 10:57:22 pm	25.319	10.8
10/16/2019 11:12:22 pm	25.319	10.8
10/16/2019 11:27:22 pm	25.319	10.8
10/16/2019 11:42:22 pm	25.319	10.8
10/16/2019 11:57:22 pm	25.319	10.8
10/17/2019 12:12:22 am	25.319	10.8
10/17/2019 12:27:22 am	25.319	10.8
10/17/2019 12:42:22 am	25.319	10.8
10/17/2019 12:57:22 am	25.319	10.8
10/17/2019 01:12:22 am	25.319	10.8
10/17/2019 01:27:22 am	25.319	10.8
10/17/2019 01:42:22 am	25.319	10.8
10/17/2019 01:57:22 am	25.319	10.8
10/17/2019 02:12:22 am	25.319	10.8
10/17/2019 02:27:22 am	25.319	0
10/17/2019 02:42:22 am	25.319	10.8
10/17/2019 02:57:22 am	25.319	10.8
10/17/2019 03:12:22 am	25.319	10.8
10/17/2019 03:27:22 am	25.319	10.8
10/17/2019 03:42:22 am	25.319	10.8
10/17/2019 03:57:22 am	25.319	10.8
10/17/2019 04:12:22 am	25.319	10.8
10/17/2019 04:27:22 am	25.319	10.8
10/17/2019 04:42:22 am	25.319	10.8
10/17/2019 04:57:22 am	25.319	10.8
10/17/2019 05:12:22 am	25.319	10.8
10/17/2019 05:27:22 am	25.319	10.8
10/17/2019 05:42:22 am	25.319	10.8
10/17/2019 05:57:22 am	25.319	10.8
10/17/2019 06:12:22 am	25.319	10.8
10/17/2019 06:27:22 am	25.319	10.8
10/17/2019 06:42:22 am	25.319	10.8
10/17/2019 06:57:22 am	25.319	10.8
10/17/2019 07:12:22 am	25.319	10.8
10/17/2019 07:27:22 am	25.319	10.8
10/17/2019 07:42:22 am	25.319	10.8
10/17/2019 07:57:22 am	25.319	10.8
10/17/2019 08:12:22 am	25.319	10.8
10/17/2019 08:27:22 am	25.319	10.8
10/17/2019 08:42:22 am	25.319	10.8
10/17/2019 08:57:22 am	25.319	10.8
10/17/2019 09:12:22 am	25.319	10.8
10/17/2019 09:27:22 am	25.416	10.8
10/17/2019 09:42:22 am	25.416	32.3
10/17/2019 09:57:22 am	25.416	32.3
10/17/2019 10:12:22 am	25.513	32.3
10/17/2019 10:27:22 am	25.513	32.3
10/17/2019 10:42:22 am	25.513	32.3
10/17/2019 10:57:22 am	25.513	32.3
10/17/2019 11:12:22 am	25.513	32.3
10/17/2019 11:27:22 am	25.513	21.5
10/17/2019 11:42:22 am	25.513	32.3
10/17/2019 11:57:22 am	25.61	32.3
10/17/2019 12:12:22 pm	25.61	32.3
10/17/2019 12:27:22 pm	25.61	32.3
10/17/2019 12:42:22 pm	25.61	32.3
10/17/2019 12:57:22 pm	25.61	32.3
10/17/2019 01:12:22 pm	25.513	32.3
10/17/2019 01:27:22 pm	25.61	32.3
10/17/2019 01:42:22 pm	25.61	32.3
10/17/2019 01:57:22 pm	25.513	32.3
10/17/2019 02:12:22 pm	25.513	32.3
10/17/2019 02:27:22 pm	25.513	21.5
10/17/2019 02:42:22 pm	25.513	21.5
10/17/2019 02:57:22 pm	25.513	21.5
10/17/2019 03:12:22 pm	25.513	32.3
10/17/2019 03:27:22 pm	25.513	21.5
10/17/2019 03:42:22 pm	25.513	21.5
10/17/2019 03:57:22 pm	25.513	21.5
10/17/2019 04:12:22 pm	25.513	32.3
10/17/2019 04:27:22 pm	25.513	32.3
10/17/2019 04:42:22 pm	25.513	32.3
10/17/2019 04:57:22 pm	25.513	32.3
10/17/2019 05:12:22 pm	25.513	10.8
10/17/2019 05:27:22 pm	25.61	21.5
10/17/2019 05:42:22 pm	25.708	32.3
10/17/2019 05:57:22 pm	25.708	32.3
10/17/2019 06:12:22 pm	25.708	10.8
10/17/2019 06:27:22 pm	25.61	10.8
10/17/2019 06:42:22 pm	25.61	10.8
10/17/2019 06:57:22 pm	25.513	10.8
10/17/2019 07:12:22 pm	25.513	10.8
10/17/2019 07:27:22 pm	25.513	10.8
10/17/2019 07:42:22 pm	25.513	21.5
10/17/2019 07:57:22 pm	25.513	10.8
10/17/2019 08:12:22 pm	25.513	21.5
10/17/2019 08:27:22 pm	25.513	10.8
10/17/2019 08:42:22 pm	25.513	10.8
10/17/2019 08:57:22 pm	25.513	10.8
10/17/2019 09:12:22 pm	25.513	10.8
10/17/2019 09:27:22 pm	25.513	10.8
10/17/2019 09:42:22 pm	25.513	21.5
10/17/2019 09:57:22 pm	25.513	10.8
10/17/2019 10:12:22 pm	25.513	10.8
10/17/2019 10:27:22 pm	25.416	10.8
10/17/2019 10:42:22 pm	25.416	10.8
10/17/2019 10:57:22 pm	25.416	10.8
10/17/2019 11:12:22 pm	25.416	10.8
10/17/2019 11:27:22 pm	25.319	10.8
10/17/2019 11:42:22 pm	25.319	10.8
10/17/2019 11:57:22 pm	25.319	10.8
10/18/2019 12:12:22 am	25.319	10.8
10/18/2019 12:27:22 am	25.319	10.8
10/18/2019 12:42:22 am	25.319	10.8
10/18/2019 12:57:22 am	25.319	10.8
10/18/2019 01:12:22 am	25.319	10.8
10/18/2019 01:27:22 am	25.319	10.8
10/18/2019 01:42:22 am	25.319	10.8
10/18/2019 01:57:22 am	25.319	10.8
10/18/2019 02:12:22 am	25.319	10.8
10/18/2019 02:27:22 am	25.319	10.8
10/18/2019 02:42:22 am	25.319	10.8
10/18/2019 02:57:22 am	25.319	10.8
10/18/2019 03:12:22 am	25.319	10.8
10/18/2019 03:27:22 am	25.319	10.8
10/18/2019 03:42:22 am	25.319	10.8
10/18/2019 03:57:22 am	25.319	10.8
10/18/2019 04:12:22 am	25.319	10.8
10/18/2019 04:27:22 am	25.319	10.8
10/18/2019 04:42:22 am	25.319	10.8
10/18/2019 04:57:22 am	25.319	10.8
10/18/2019 05:12:22 am	25.319	10.8
10/18/2019 05:27:22 am	25.319	10.8
10/18/2019 05:42:22 am	25.416	10.8
10/18/2019 05:57:22 am	25.319	10.8
10/18/2019 06:12:22 am	25.319	10.8
10/18/2019 06:27:22 am	25.319	10.8
10/18/2019 06:42:22 am	25.319	10.8
10/18/2019 06:57:22 am	25.319	10.8
10/18/2019 07:12:22 am	25.319	21.5
10/18/2019 07:27:22 am	25.416	10.8
10/18/2019 07:42:22 am	25.416	21.5
10/18/2019 07:57:22 am	25.416	10.8
10/18/2019 08:12:22 am	25.416	10.8
10/18/2019 08:27:22 am	25.416	10.8
10/18/2019 08:42:22 am	25.416	21.5
10/18/2019 08:57:22 am	25.513	21.5
10/18/2019 09:12:22 am	25.513	10.8
10/18/2019 09:27:22 am	25.513	10.8
10/18/2019 09:42:22 am	25.513	21.5
10/18/2019 09:57:22 am	25.513	32.3
10/18/2019 10:12:22 am	25.61	32.3
10/18/2019 10:27:22 am	25.61	10.8
10/18/2019 10:42:22 am	25.61	21.5
10/18/2019 10:57:22 am	25.61	10.8
10/18/2019 11:12:22 am	25.61	10.8
10/18/2019 11:27:22 am	25.513	10.8
10/18/2019 11:42:22 am	25.513	10.8
10/18/2019 11:57:22 am	25.513	10.8
10/18/2019 12:12:22 pm	25.513	10.8
10/18/2019 12:27:22 pm	25.513	10.8
10/18/2019 12:42:22 pm	25.513	10.8
10/18/2019 12:57:22 pm	25.513	21.5
10/18/2019 01:12:22 pm	25.513	10.8
10/18/2019 01:27:22 pm	25.513	10.8
10/18/2019 01:42:22 pm	25.513	21.5
10/18/2019 01:57:22 pm	25.513	10.8
10/18/2019 02:12:22 pm	25.61	10.8
10/18/2019 02:27:22 pm	25.61	10.8
10/18/2019 02:42:22 pm	25.61	10.8
10/18/2019 02:57:22 pm	25.513	10.8
10/18/2019 03:12:22 pm	25.513	10.8
10/18/2019 03:27:22 pm	25.416	10.8
10/18/2019 03:42:22 pm	25.416	10.8
10/18/2019 03:57:22 pm	25.416	10.8
10/18/2019 04:12:22 pm	25.416	10.8
10/18/2019 04:27:22 pm	25.416	10.8
10/18/2019 04:42:22 pm	25.416	10.8
10/18/2019 04:57:22 pm	25.416	10.8
10/18/2019 05:12:22 pm	25.416	10.8
10/18/2019 05:27:22 pm	25.416	10.8
10/18/2019 05:42:22 pm	25.416	10.8
10/18/2019 05:57:22 pm	25.416	10.8
10/18/2019 06:12:22 pm	25.416	10.8
10/18/2019 06:27:22 pm	25.416	10.8
10/18/2019 06:42:22 pm	25.416	10.8
10/18/2019 06:57:22 pm	25.416	10.8
10/18/2019 07:12:22 pm	25.416	10.8
10/18/2019 07:27:22 pm	25.416	10.8
10/18/2019 07:42:22 pm	25.416	10.8
10/18/2019 07:57:22 pm	25.416	10.8
10/18/2019 08:12:22 pm	25.416	10.8
10/18/2019 08:27:22 pm	25.416	10.8
10/18/2019 08:42:22 pm	25.416	10.8
10/18/2019 08:57:22 pm	25.416	10.8
10/18/2019 09:12:22 pm	25.416	10.8
10/18/2019 09:27:22 pm	25.416	10.8
10/18/2019 09:42:22 pm	25.416	10.8
10/18/2019 09:57:22 pm	25.416	10.8
10/18/2019 10:12:22 pm	25.319	10.8
10/18/2019 10:27:22 pm	25.319	10.8
10/18/2019 10:42:22 pm	25.319	10.8
10/18/2019 10:57:22 pm	25.319	10.8
10/18/2019 11:12:22 pm	25.319	10.8
10/18/2019 11:27:22 pm	25.319	10.8
10/18/2019 11:42:22 pm	25.319	10.8
10/18/2019 11:57:22 pm	25.319	10.8
10/19/2019 12:12:22 am	25.319	10.8
10/19/2019 12:27:22 am	25.319	10.8
10/19/2019 12:42:22 am	25.319	10.8
10/19/2019 12:57:22 am	25.222	10.8
10/19/2019 01:12:22 am	25.319	10.8
10/19/2019 01:27:22 am	25.222	10.8
10/19/2019 01:42:22 am	25.319	10.8
10/19/2019 01:57:22 am	25.319	10.8
10/19/2019 02:12:22 am	25.319	10.8
10/19/2019 02:27:22 am	25.319	10.8
10/19/2019 02:42:22 am	25.319	10.8
10/19/2019 02:57:22 am	25.319	10.8
10/19/2019 03:12:22 am	25.319	10.8
10/19/2019 03:27:22 am	25.319	10.8
10/19/2019 03:42:22 am	25.222	10.8
10/19/2019 03:57:22 am	25.319	10.8
10/19/2019 04:12:22 am	25.222	10.8
10/19/2019 04:27:22 am	25.222	10.8
10/19/2019 04:42:22 am	25.319	10.8
10/19/2019 04:57:22 am	25.222	10.8
10/19/2019 05:12:22 am	25.222	10.8
10/19/2019 05:27:22 am	25.222	10.8
10/19/2019 05:42:22 am	25.222	10.8
10/19/2019 05:57:22 am	25.222	10.8
10/19/2019 06:12:22 am	25.222	10.8
10/19/2019 06:27:22 am	25.222	10.8
10/19/2019 06:42:22 am	25.222	10.8
10/19/2019 06:57:22 am	25.222	10.8
10/19/2019 07:12:22 am	25.222	10.8
10/19/2019 07:27:22 am	25.222	10.8
10/19/2019 07:42:22 am	25.222	10.8
10/19/2019 07:57:22 am	25.319	10.8
10/19/2019 08:12:22 am	25.319	10.8
10/19/2019 08:27:22 am	25.319	10.8
10/19/2019 08:42:22 am	25.319	10.8
10/19/2019 08:57:22 am	25.319	10.8
10/19/2019 09:12:22 am	25.319	10.8
10/19/2019 09:27:22 am	25.416	21.5
10/19/2019 09:42:22 am	25.416	32.3
10/19/2019 09:57:22 am	25.513	32.3
10/19/2019 10:12:22 am	25.513	32.3
10/19/2019 10:27:22 am	25.513	21.5
10/19/2019 10:42:22 am	25.61	32.3
10/19/2019 10:57:22 am	25.513	32.3
10/19/2019 11:12:22 am	25.61	32.3
10/19/2019 11:27:22 am	25.61	21.5
10/19/2019 11:42:22 am	25.61	32.3
10/19/2019 11:57:22 am	25.61	21.5
10/19/2019 12:12:22 pm	25.61	21.5
10/19/2019 12:27:22 pm	25.61	32.3
10/19/2019 12:42:22 pm	25.61	32.3
10/19/2019 12:57:22 pm	25.61	32.3
10/19/2019 01:12:22 pm	25.513	32.3
10/19/2019 01:27:22 pm	25.513	32.3
10/19/2019 01:42:22 pm	25.513	32.3
10/19/2019 01:57:22 pm	25.513	32.3
10/19/2019 02:12:22 pm	25.513	32.3
10/19/2019 02:27:22 pm	25.513	32.3
10/19/2019 02:42:22 pm	25.513	32.3
10/19/2019 02:57:22 pm	25.513	32.3
10/19/2019 03:12:22 pm	25.513	32.3
10/19/2019 03:27:22 pm	25.513	32.3
10/19/2019 03:42:22 pm	25.513	32.3
10/19/2019 03:57:22 pm	25.513	32.3
10/19/2019 04:12:22 pm	25.513	32.3
10/19/2019 04:27:22 pm	25.513	32.3
10/19/2019 04:42:22 pm	25.513	32.3
10/19/2019 04:57:22 pm	25.61	32.3
10/19/2019 05:12:22 pm	25.61	32.3
10/19/2019 05:27:22 pm	25.513	32.3
10/19/2019 05:42:22 pm	25.513	32.3
10/19/2019 05:57:22 pm	25.513	32.3
10/19/2019 06:12:22 pm	25.513	32.3
10/19/2019 06:27:22 pm	25.513	32.3
10/19/2019 06:42:22 pm	25.513	32.3
10/19/2019 06:57:22 pm	25.513	32.3
10/19/2019 07:12:22 pm	25.513	32.3
10/19/2019 07:27:22 pm	25.513	32.3
10/19/2019 07:42:22 pm	25.513	32.3
10/19/2019 07:57:22 pm	25.513	32.3
10/19/2019 08:12:22 pm	25.513	32.3
10/19/2019 08:27:22 pm	25.513	32.3
10/19/2019 08:42:22 pm	25.513	32.3
10/19/2019 08:57:22 pm	25.513	32.3
10/19/2019 09:12:22 pm	25.513	32.3
10/19/2019 09:27:22 pm	25.513	32.3
10/19/2019 09:42:22 pm	25.61	32.3
10/19/2019 09:57:22 pm	25.513	21.5
10/19/2019 10:12:22 pm	25.513	32.3
10/19/2019 10:27:22 pm	25.513	32.3
10/19/2019 10:42:22 pm	25.513	32.3
10/19/2019 10:57:22 pm	25.513	32.3
10/19/2019 11:12:22 pm	25.513	32.3
10/19/2019 11:27:22 pm	25.513	32.3
10/19/2019 11:42:22 pm	25.513	32.3
10/19/2019 11:57:22 pm	25.416	32.3
10/20/2019 12:12:22 am	25.416	32.3
10/20/2019 12:27:22 am	25.416	32.3
10/20/2019 12:42:22 am	25.416	32.3
10/20/2019 12:57:22 am	25.416	32.3
10/20/2019 01:12:22 am	25.416	32.3
10/20/2019 01:27:22 am	25.416	32.3
10/20/2019 01:42:22 am	25.416	32.3
10/20/2019 01:57:22 am	25.416	32.3
10/20/2019 02:12:22 am	25.416	21.5
10/20/2019 02:27:22 am	25.416	32.3
10/20/2019 02:42:22 am	25.416	32.3
10/20/2019 02:57:22 am	25.416	21.5
10/20/2019 03:12:22 am	25.416	32.3
10/20/2019 03:27:22 am	25.416	32.3
10/20/2019 03:42:22 am	25.416	32.3
10/20/2019 03:57:22 am	25.416	32.3
10/20/2019 04:12:22 am	25.416	21.5
10/20/2019 04:27:22 am	25.416	32.3
10/20/2019 04:42:22 am	25.416	32.3
10/20/2019 04:57:22 am	25.416	32.3
10/20/2019 05:12:22 am	25.416	32.3
10/20/2019 05:27:22 am	25.416	32.3
10/20/2019 05:42:22 am	25.416	32.3
10/20/2019 05:57:22 am	25.416	32.3
10/20/2019 06:12:22 am	25.416	32.3
10/20/2019 06:27:22 am	25.416	32.3
10/20/2019 06:42:22 am	25.416	32.3
10/20/2019 06:57:22 am	25.416	32.3
10/20/2019 07:12:22 am	25.416	32.3
10/20/2019 07:27:22 am	25.416	32.3
10/20/2019 07:42:22 am	25.416	32.3
10/20/2019 07:57:22 am	25.416	32.3
10/20/2019 08:12:22 am	25.513	32.3
10/20/2019 08:27:22 am	25.513	32.3
10/20/2019 08:42:22 am	25.513	32.3
10/20/2019 08:57:22 am	25.513	32.3
10/20/2019 09:12:22 am	25.513	32.3
10/20/2019 09:27:22 am	25.513	10.8
10/20/2019 09:42:22 am	25.513	10.8
10/20/2019 09:57:22 am	25.513	10.8
10/20/2019 10:12:22 am	25.513	10.8
10/20/2019 10:27:22 am	25.416	10.8
10/20/2019 10:42:22 am	25.416	10.8
10/20/2019 10:57:22 am	25.416	10.8
10/20/2019 11:12:22 am	25.416	10.8
10/20/2019 11:27:22 am	25.513	10.8
10/20/2019 11:42:22 am	25.513	10.8
10/20/2019 11:57:22 am	25.513	10.8
10/20/2019 12:12:22 pm	25.513	10.8
10/20/2019 12:27:22 pm	25.513	10.8
10/20/2019 12:42:22 pm	25.513	10.8
10/20/2019 12:57:22 pm	25.513	10.8
10/20/2019 01:12:22 pm	25.416	10.8
10/20/2019 01:27:22 pm	25.416	10.8
10/20/2019 01:42:22 pm	25.416	10.8
10/20/2019 01:57:22 pm	25.416	10.8
10/20/2019 02:12:22 pm	25.416	10.8
10/20/2019 02:27:22 pm	25.416	10.8
10/20/2019 02:42:22 pm	25.416	10.8
10/20/2019 02:57:22 pm	25.416	10.8
10/20/2019 03:12:22 pm	25.416	10.8
10/20/2019 03:27:22 pm	25.416	10.8
10/20/2019 03:42:22 pm	25.416	10.8
10/20/2019 03:57:22 pm	25.416	10.8
10/20/2019 04:12:22 pm	25.416	10.8
10/20/2019 04:27:22 pm	25.416	10.8
10/20/2019 04:42:22 pm	25.416	10.8
10/20/2019 04:57:22 pm	25.416	10.8
10/20/2019 05:12:22 pm	25.416	10.8
10/20/2019 05:27:22 pm	25.416	10.8
10/20/2019 05:42:22 pm	25.416	10.8
10/20/2019 05:57:22 pm	25.416	10.8
10/20/2019 06:12:22 pm	25.416	10.8
10/20/2019 06:27:22 pm	25.513	10.8
10/20/2019 06:42:22 pm	25.416	10.8
10/20/2019 06:57:22 pm	25.416	10.8
10/20/2019 07:12:22 pm	25.416	10.8
10/20/2019 07:27:22 pm	25.416	10.8
10/20/2019 07:42:22 pm	25.416	10.8
10/20/2019 07:57:22 pm	25.416	10.8
10/20/2019 08:12:22 pm	25.416	10.8
10/20/2019 08:27:22 pm	25.416	10.8
10/20/2019 08:42:22 pm	25.513	10.8
10/20/2019 08:57:22 pm	25.513	10.8
10/20/2019 09:12:22 pm	25.416	10.8
10/20/2019 09:27:22 pm	25.416	10.8
10/20/2019 09:42:22 pm	25.513	10.8
10/20/2019 09:57:22 pm	25.416	10.8
10/20/2019 10:12:22 pm	25.416	10.8
10/20/2019 10:27:22 pm	25.416	10.8
10/20/2019 10:42:22 pm	25.416	10.8
10/20/2019 10:57:22 pm	25.416	10.8
10/20/2019 11:12:22 pm	25.416	10.8
10/20/2019 11:27:22 pm	25.319	10.8
10/20/2019 11:42:22 pm	25.319	10.8
10/20/2019 11:57:22 pm	25.319	10.8
10/21/2019 12:12:22 am	25.319	10.8
10/21/2019 12:27:22 am	25.319	10.8
10/21/2019 12:42:22 am	25.319	10.8
10/21/2019 12:57:22 am	25.319	10.8
10/21/2019 01:12:22 am	25.319	10.8
10/21/2019 01:27:22 am	25.319	10.8
10/21/2019 01:42:22 am	25.319	10.8
10/21/2019 01:57:22 am	25.319	10.8
10/21/2019 02:12:22 am	25.319	10.8
10/21/2019 02:27:22 am	25.319	10.8
10/21/2019 02:42:22 am	25.319	10.8
10/21/2019 02:57:22 am	25.319	10.8
10/21/2019 03:12:22 am	25.319	10.8
10/21/2019 03:27:22 am	25.319	10.8
10/21/2019 03:42:22 am	25.319	10.8
10/21/2019 03:57:22 am	25.319	10.8
10/21/2019 04:12:22 am	25.319	10.8
10/21/2019 04:27:22 am	25.319	10.8
10/21/2019 04:42:22 am	25.319	10.8
10/21/2019 04:57:22 am	25.319	10.8
10/21/2019 05:12:22 am	25.319	10.8
10/21/2019 05:27:22 am	25.319	10.8
10/21/2019 05:42:22 am	25.319	10.8
10/21/2019 05:57:22 am	25.319	10.8
10/21/2019 06:12:22 am	25.222	10.8
10/21/2019 06:27:22 am	25.319	10.8
10/21/2019 06:42:22 am	25.319	10.8
10/21/2019 06:57:22 am	25.319	10.8
10/21/2019 07:12:22 am	25.319	10.8
10/21/2019 07:27:22 am	25.319	10.8
10/21/2019 07:42:22 am	25.319	10.8
10/21/2019 07:57:22 am	25.319	10.8
10/21/2019 08:12:22 am	25.319	10.8
10/21/2019 08:27:22 am	25.319	10.8
10/21/2019 08:42:22 am	25.416	10.8
10/21/2019 08:57:22 am	25.416	10.8
10/21/2019 09:12:22 am	25.416	10.8
10/21/2019 09:27:22 am	25.416	10.8
10/21/2019 09:42:22 am	25.416	10.8
10/21/2019 09:57:22 am	25.416	10.8
10/21/2019 10:12:22 am	25.61	10.8
10/21/2019 10:27:22 am	25.61	10.8
10/21/2019 10:42:22 am	25.61	10.8
10/21/2019 10:57:22 am	25.61	10.8
10/21/2019 11:12:22 am	25.513	10.8
10/21/2019 11:27:22 am	25.416	10.8
10/21/2019 11:42:22 am	25.416	10.8
10/21/2019 11:57:22 am	25.416	10.8
10/21/2019 12:12:22 pm	25.416	10.8
10/21/2019 12:27:22 pm	25.416	10.8
10/21/2019 12:42:22 pm	25.416	10.8
10/21/2019 12:57:22 pm	25.416	10.8
10/21/2019 01:12:22 pm	25.416	10.8
10/21/2019 01:27:22 pm	25.416	10.8
10/21/2019 01:42:22 pm	25.416	10.8
10/21/2019 01:57:22 pm	25.416	10.8
10/21/2019 02:12:22 pm	25.416	10.8
10/21/2019 02:27:22 pm	25.319	10.8
10/21/2019 02:42:22 pm	25.416	10.8
10/21/2019 02:57:22 pm	25.416	10.8
10/21/2019 03:12:22 pm	25.416	10.8
10/21/2019 03:27:22 pm	25.416	10.8
10/21/2019 03:42:22 pm	25.416	10.8
10/21/2019 03:57:22 pm	25.416	10.8
10/21/2019 04:12:22 pm	25.416	10.8
10/21/2019 04:27:22 pm	25.416	10.8
10/21/2019 04:42:22 pm	25.416	10.8
10/21/2019 04:57:22 pm	25.416	10.8
10/21/2019 05:12:22 pm	25.416	10.8
10/21/2019 05:27:22 pm	25.416	10.8
10/21/2019 05:42:22 pm	25.416	10.8
10/21/2019 05:57:22 pm	25.416	10.8
10/21/2019 06:12:22 pm	25.416	10.8
10/21/2019 06:27:22 pm	25.416	10.8
10/21/2019 06:42:22 pm	25.416	10.8
10/21/2019 06:57:22 pm	25.416	10.8
10/21/2019 07:12:22 pm	25.416	10.8
10/21/2019 07:27:22 pm	25.416	10.8
10/21/2019 07:42:22 pm	25.416	10.8
10/21/2019 07:57:22 pm	25.416	10.8
10/21/2019 08:12:22 pm	25.416	10.8
10/21/2019 08:27:22 pm	25.416	10.8
10/21/2019 08:42:22 pm	25.416	10.8
10/21/2019 08:57:22 pm	25.416	10.8
10/21/2019 09:12:22 pm	25.416	10.8
10/21/2019 09:27:22 pm	25.416	10.8
10/21/2019 09:42:22 pm	25.416	10.8
10/21/2019 09:57:22 pm	25.416	10.8
10/21/2019 10:12:22 pm	25.416	10.8
10/21/2019 10:27:22 pm	25.416	10.8
10/21/2019 10:42:22 pm	25.416	10.8
10/21/2019 10:57:22 pm	25.416	10.8
10/21/2019 11:12:22 pm	25.416	10.8
10/21/2019 11:27:22 pm	25.416	10.8
10/21/2019 11:42:22 pm	25.416	10.8
10/21/2019 11:57:22 pm	25.416	10.8
10/22/2019 12:12:22 am	25.319	10.8
10/22/2019 12:27:22 am	25.319	10.8
10/22/2019 12:42:22 am	25.319	10.8
10/22/2019 12:57:22 am	25.319	10.8
10/22/2019 01:12:22 am	25.319	10.8
10/22/2019 01:27:22 am	25.319	10.8
10/22/2019 01:42:22 am	25.319	10.8
10/22/2019 01:57:22 am	25.416	10.8
10/22/2019 02:12:22 am	25.319	10.8
10/22/2019 02:27:22 am	25.319	10.8
10/22/2019 02:42:22 am	25.319	10.8
10/22/2019 02:57:22 am	25.319	10.8
10/22/2019 03:12:22 am	25.319	10.8
10/22/2019 03:27:22 am	25.319	10.8
10/22/2019 03:42:22 am	25.319	10.8
10/22/2019 03:57:22 am	25.319	10.8
10/22/2019 04:12:22 am	25.319	10.8
10/22/2019 04:27:22 am	25.319	10.8
10/22/2019 04:42:22 am	25.319	10.8
10/22/2019 04:57:22 am	25.319	10.8
10/22/2019 05:12:22 am	25.319	10.8
10/22/2019 05:27:22 am	25.319	10.8
10/22/2019 05:42:22 am	25.319	10.8
10/22/2019 05:57:22 am	25.319	10.8
10/22/2019 06:12:22 am	25.319	10.8
10/22/2019 06:27:22 am	25.319	10.8
10/22/2019 06:42:22 am	25.222	10.8
10/22/2019 06:57:22 am	25.319	10.8
10/22/2019 07:12:22 am	25.319	10.8
10/22/2019 07:27:22 am	25.319	10.8
10/22/2019 07:42:22 am	25.319	10.8
10/22/2019 07:57:22 am	25.319	10.8
10/22/2019 08:12:22 am	25.319	10.8
10/22/2019 08:27:22 am	25.319	10.8
10/22/2019 08:42:22 am	25.319	10.8
10/22/2019 08:57:22 am	25.319	10.8
10/22/2019 09:12:22 am	25.319	10.8
10/22/2019 09:27:22 am	25.319	10.8
10/22/2019 09:42:22 am	25.319	10.8
10/22/2019 09:57:22 am	25.416	10.8
10/22/2019 10:12:22 am	25.416	10.8
10/22/2019 10:27:22 am	25.416	10.8
10/22/2019 10:42:22 am	25.416	10.8
10/22/2019 10:57:22 am	25.416	10.8
10/22/2019 11:12:22 am	25.416	10.8
10/22/2019 11:27:22 am	25.319	10.8
10/22/2019 11:42:22 am	25.319	10.8
10/22/2019 11:57:22 am	25.319	10.8
10/22/2019 12:12:22 pm	25.319	10.8
10/22/2019 12:27:22 pm	25.319	10.8
10/22/2019 12:42:22 pm	25.416	10.8
10/22/2019 12:57:22 pm	25.416	10.8
10/22/2019 01:12:22 pm	25.416	10.8
10/22/2019 01:27:22 pm	25.416	10.8
10/22/2019 01:42:22 pm	25.416	10.8
10/22/2019 01:57:22 pm	25.416	10.8
10/22/2019 02:12:22 pm	25.416	10.8
10/22/2019 02:27:22 pm	25.319	10.8
10/22/2019 02:42:22 pm	25.416	10.8
10/22/2019 02:57:22 pm	25.319	10.8
10/22/2019 03:12:22 pm	25.416	10.8
10/22/2019 03:27:22 pm	25.416	10.8
10/22/2019 03:42:22 pm	25.319	10.8
10/22/2019 03:57:22 pm	25.416	10.8
10/22/2019 04:12:22 pm	25.416	10.8
10/22/2019 04:27:22 pm	25.513	10.8
10/22/2019 04:42:22 pm	25.416	10.8
10/22/2019 04:57:22 pm	25.416	10.8
10/22/2019 05:12:22 pm	25.416	10.8
10/22/2019 05:27:22 pm	25.416	10.8
10/22/2019 05:42:22 pm	25.416	10.8
10/22/2019 05:57:22 pm	25.416	10.8
10/22/2019 06:12:22 pm	25.416	10.8
10/22/2019 06:27:22 pm	25.416	10.8
10/22/2019 06:42:22 pm	25.416	10.8
10/22/2019 06:57:22 pm	25.416	10.8
10/22/2019 07:12:22 pm	25.416	10.8
10/22/2019 07:27:22 pm	25.416	10.8
10/22/2019 07:42:22 pm	25.416	10.8
10/22/2019 07:57:22 pm	25.416	10.8
10/22/2019 08:12:22 pm	25.416	10.8
10/22/2019 08:27:22 pm	25.416	10.8
10/22/2019 08:42:22 pm	25.416	10.8
10/22/2019 08:57:22 pm	25.416	10.8
10/22/2019 09:12:22 pm	25.416	10.8
10/22/2019 09:27:22 pm	25.416	10.8
10/22/2019 09:42:22 pm	25.416	10.8
10/22/2019 09:57:22 pm	25.416	10.8
10/22/2019 10:12:22 pm	25.416	10.8
10/22/2019 10:27:22 pm	25.416	10.8
10/22/2019 10:42:22 pm	25.416	10.8
10/22/2019 10:57:22 pm	25.319	10.8
10/22/2019 11:12:22 pm	25.416	10.8
10/22/2019 11:27:22 pm	25.416	10.8
10/22/2019 11:42:22 pm	25.319	10.8
10/22/2019 11:57:22 pm	25.319	10.8
10/23/2019 12:12:22 am	25.319	10.8
10/23/2019 12:27:22 am	25.319	10.8
10/23/2019 12:42:22 am	25.319	10.8
10/23/2019 12:57:22 am	25.319	10.8
10/23/2019 01:12:22 am	25.319	10.8
10/23/2019 01:27:22 am	25.319	10.8
10/23/2019 01:42:22 am	25.319	10.8
10/23/2019 01:57:22 am	25.319	10.8
10/23/2019 02:12:22 am	25.319	10.8
10/23/2019 02:27:22 am	25.319	10.8
10/23/2019 02:42:22 am	25.319	10.8
10/23/2019 02:57:22 am	25.319	10.8
10/23/2019 03:12:22 am	25.319	10.8
10/23/2019 03:27:22 am	25.319	10.8
10/23/2019 03:42:22 am	25.319	10.8
10/23/2019 03:57:22 am	25.319	10.8
10/23/2019 04:12:22 am	25.319	10.8
10/23/2019 04:27:22 am	25.319	10.8
10/23/2019 04:42:22 am	25.319	10.8
10/23/2019 04:57:22 am	25.319	10.8
10/23/2019 05:12:22 am	25.319	10.8
10/23/2019 05:27:22 am	25.319	10.8
10/23/2019 05:42:22 am	25.319	10.8
10/23/2019 05:57:22 am	25.319	10.8
10/23/2019 06:12:22 am	25.319	10.8
10/23/2019 06:27:22 am	25.319	10.8
10/23/2019 06:42:22 am	25.222	10.8
10/23/2019 06:57:22 am	25.222	10.8
10/23/2019 07:12:22 am	25.222	10.8
10/23/2019 07:27:22 am	25.222	10.8
10/23/2019 07:42:22 am	25.222	10.8
10/23/2019 07:57:22 am	25.319	10.8
10/23/2019 08:12:22 am	25.319	10.8
10/23/2019 08:27:22 am	25.319	10.8
10/23/2019 08:42:22 am	25.319	10.8
10/23/2019 08:57:22 am	25.319	10.8
10/23/2019 09:12:22 am	25.319	10.8
10/23/2019 09:27:22 am	25.319	32.3
10/23/2019 09:42:22 am	25.416	32.3
10/23/2019 09:57:22 am	25.513	32.3
10/23/2019 10:12:22 am	25.513	32.3
10/23/2019 10:27:22 am	25.513	32.3
10/23/2019 10:42:22 am	25.513	32.3
10/23/2019 10:57:22 am	25.513	32.3
10/23/2019 11:12:22 am	25.513	32.3
10/23/2019 11:27:22 am	25.513	32.3
10/23/2019 11:42:22 am	25.513	32.3
10/23/2019 11:57:22 am	25.513	32.3
10/23/2019 12:12:22 pm	25.513	32.3
10/23/2019 12:27:22 pm	25.513	32.3
10/23/2019 12:42:22 pm	25.513	32.3
10/23/2019 12:57:22 pm	25.513	32.3
10/23/2019 01:12:22 pm	25.513	32.3
10/23/2019 01:27:22 pm	25.513	32.3
10/23/2019 01:42:22 pm	25.513	32.3
10/23/2019 01:57:22 pm	25.513	32.3
10/23/2019 02:12:22 pm	25.513	32.3
10/23/2019 02:27:22 pm	25.513	32.3
10/23/2019 02:42:22 pm	25.513	32.3
10/23/2019 02:57:22 pm	25.513	32.3
10/23/2019 03:12:22 pm	25.513	32.3
10/23/2019 03:27:22 pm	25.513	32.3
10/23/2019 03:42:22 pm	25.513	32.3
10/23/2019 03:57:22 pm	25.513	32.3
10/23/2019 04:12:22 pm	25.513	32.3
10/23/2019 04:27:22 pm	25.513	32.3
10/23/2019 04:42:22 pm	25.513	32.3
10/23/2019 04:57:22 pm	25.513	32.3
10/23/2019 05:12:22 pm	25.61	32.3
10/23/2019 05:27:22 pm	25.513	32.3
10/23/2019 05:42:22 pm	25.513	32.3
10/23/2019 05:57:22 pm	25.513	32.3
10/23/2019 06:12:22 pm	25.513	32.3
10/23/2019 06:27:22 pm	25.513	32.3
10/23/2019 06:42:22 pm	25.513	32.3
10/23/2019 06:57:22 pm	25.513	32.3
10/23/2019 07:12:22 pm	25.513	32.3
10/23/2019 07:27:22 pm	25.513	32.3
10/23/2019 07:42:22 pm	25.513	32.3
10/23/2019 07:57:22 pm	25.513	32.3
10/23/2019 08:12:22 pm	25.513	32.3
10/23/2019 08:27:22 pm	25.513	32.3
10/23/2019 08:42:22 pm	25.513	32.3
10/23/2019 08:57:22 pm	25.513	32.3
10/23/2019 09:12:22 pm	25.513	32.3
10/23/2019 09:27:22 pm	25.513	32.3
10/23/2019 09:42:22 pm	25.513	32.3
10/23/2019 09:57:22 pm	25.513	32.3
10/23/2019 10:12:22 pm	25.513	32.3
10/23/2019 10:27:22 pm	25.513	32.3
10/23/2019 10:42:22 pm	25.513	32.3
10/23/2019 10:57:22 pm	25.513	32.3
10/23/2019 11:12:22 pm	25.513	21.5
10/23/2019 11:27:22 pm	25.513	21.5
10/23/2019 11:42:22 pm	25.513	32.3
10/23/2019 11:57:22 pm	25.416	32.3
10/24/2019 12:12:22 am	25.416	32.3
10/24/2019 12:27:22 am	25.416	21.5
10/24/2019 12:42:22 am	25.416	32.3
10/24/2019 12:57:22 am	25.416	32.3
10/24/2019 01:12:22 am	25.416	32.3
10/24/2019 01:27:22 am	25.416	32.3
10/24/2019 01:42:22 am	25.416	32.3
10/24/2019 01:57:22 am	25.416	32.3
10/24/2019 02:12:22 am	25.416	32.3
10/24/2019 02:27:22 am	25.416	32.3
10/24/2019 02:42:22 am	25.416	32.3
10/24/2019 02:57:22 am	25.416	32.3
10/24/2019 03:12:22 am	25.416	32.3
10/24/2019 03:27:22 am	25.416	32.3
10/24/2019 03:42:22 am	25.416	32.3
10/24/2019 03:57:22 am	25.416	32.3
10/24/2019 04:12:22 am	25.416	32.3
10/24/2019 04:27:22 am	25.416	32.3
10/24/2019 04:42:22 am	25.416	32.3
10/24/2019 04:57:22 am	25.416	32.3
10/24/2019 05:12:22 am	25.416	32.3
10/24/2019 05:27:22 am	25.416	32.3
10/24/2019 05:42:22 am	25.416	32.3
10/24/2019 05:57:22 am	25.416	32.3
10/24/2019 06:12:22 am	25.416	32.3
10/24/2019 06:27:22 am	25.416	32.3
10/24/2019 06:42:22 am	25.416	32.3
10/24/2019 06:57:22 am	25.416	32.3
10/24/2019 07:12:22 am	25.416	32.3
10/24/2019 07:27:22 am	25.416	32.3
10/24/2019 07:42:22 am	25.416	32.3
10/24/2019 07:57:22 am	25.416	32.3
10/24/2019 08:12:22 am	25.416	32.3
10/24/2019 08:27:22 am	25.416	32.3
10/24/2019 08:42:22 am	25.416	32.3
10/24/2019 08:57:22 am	25.416	32.3
10/24/2019 09:12:22 am	25.416	32.3
10/24/2019 09:27:22 am	25.416	32.3
10/24/2019 09:42:22 am	25.416	10.8
10/24/2019 09:57:22 am	25.416	10.8
10/24/2019 10:12:22 am	25.416	10.8
10/24/2019 10:27:22 am	25.319	10.8
10/24/2019 10:42:22 am	25.319	10.8
10/24/2019 10:57:22 am	25.319	10.8
10/24/2019 11:12:22 am	25.416	10.8
10/24/2019 11:27:22 am	25.416	10.8
10/24/2019 11:42:22 am	25.416	10.8
10/24/2019 11:57:22 am	25.513	10.8
10/24/2019 12:12:22 pm	25.416	10.8
10/24/2019 12:27:22 pm	25.416	10.8
10/24/2019 12:42:22 pm	25.416	10.8
10/24/2019 12:57:22 pm	25.416	10.8
10/24/2019 01:12:22 pm	25.416	10.8
10/24/2019 01:27:22 pm	25.416	10.8
10/24/2019 01:42:22 pm	25.416	10.8
10/24/2019 01:57:22 pm	25.416	10.8
10/24/2019 02:12:22 pm	25.416	10.8
10/24/2019 02:27:22 pm	25.416	10.8
10/24/2019 02:42:22 pm	25.416	10.8
10/24/2019 02:57:22 pm	25.416	10.8
10/24/2019 03:12:22 pm	25.416	10.8
10/24/2019 03:27:22 pm	25.416	10.8
10/24/2019 03:42:22 pm	25.416	10.8
10/24/2019 03:57:22 pm	25.416	21.5
10/24/2019 04:12:22 pm	25.416	10.8
10/24/2019 04:27:22 pm	25.416	10.8
10/24/2019 04:42:22 pm	25.319	10.8
10/24/2019 04:57:22 pm	25.319	10.8
10/24/2019 05:12:22 pm	25.319	10.8
10/24/2019 05:27:22 pm	25.319	10.8
10/24/2019 05:42:22 pm	25.319	10.8
10/24/2019 05:57:22 pm	25.319	10.8
10/24/2019 06:12:22 pm	25.319	10.8
10/24/2019 06:27:22 pm	25.319	10.8
10/24/2019 06:42:22 pm	25.319	10.8
10/24/2019 06:57:22 pm	25.319	10.8
10/24/2019 07:12:22 pm	25.319	10.8
10/24/2019 07:27:22 pm	25.319	10.8
10/24/2019 07:42:22 pm	25.319	10.8
10/24/2019 07:57:22 pm	25.222	10.8
10/24/2019 08:12:22 pm	25.319	10.8
10/24/2019 08:27:22 pm	25.319	10.8
10/24/2019 08:42:22 pm	25.222	10.8
10/24/2019 08:57:22 pm	25.319	10.8
10/24/2019 09:12:22 pm	25.222	10.8
10/24/2019 09:27:22 pm	25.222	10.8
10/24/2019 09:42:22 pm	25.222	10.8
10/24/2019 09:57:22 pm	25.222	10.8
10/24/2019 10:12:22 pm	25.222	10.8
10/24/2019 10:27:22 pm	25.222	10.8
10/24/2019 10:42:22 pm	25.222	10.8
10/24/2019 10:57:22 pm	25.222	10.8
10/24/2019 11:12:22 pm	25.222	10.8
10/24/2019 11:27:22 pm	25.222	10.8
10/24/2019 11:42:22 pm	25.222	10.8
10/24/2019 11:57:22 pm	25.222	10.8
10/25/2019 12:12:22 am	25.222	10.8
10/25/2019 12:27:22 am	25.125	10.8
10/25/2019 12:42:22 am	25.222	10.8
10/25/2019 12:57:22 am	25.222	10.8
10/25/2019 01:12:22 am	25.222	10.8
10/25/2019 01:27:22 am	25.222	10.8
10/25/2019 01:42:22 am	25.222	10.8
10/25/2019 01:57:22 am	25.222	10.8
10/25/2019 02:12:22 am	25.222	10.8
10/25/2019 02:27:22 am	25.222	10.8
10/25/2019 02:42:22 am	25.222	10.8
10/25/2019 02:57:22 am	25.222	10.8
10/25/2019 03:12:22 am	25.222	10.8
10/25/2019 03:27:22 am	25.222	10.8
10/25/2019 03:42:22 am	25.222	10.8
10/25/2019 03:57:22 am	25.125	10.8
10/25/2019 04:12:22 am	25.222	10.8
10/25/2019 04:27:22 am	25.125	10.8
10/25/2019 04:42:22 am	25.222	10.8
10/25/2019 04:57:22 am	25.222	10.8
10/25/2019 05:12:22 am	25.222	10.8
10/25/2019 05:27:22 am	25.125	10.8
10/25/2019 05:42:22 am	25.125	10.8
10/25/2019 05:57:22 am	25.125	10.8
10/25/2019 06:12:22 am	25.125	10.8
10/25/2019 06:27:22 am	25.125	10.8
10/25/2019 06:42:22 am	25.125	10.8
10/25/2019 06:57:22 am	25.125	10.8
10/25/2019 07:12:22 am	25.125	10.8
10/25/2019 07:27:22 am	25.125	10.8
10/25/2019 07:42:22 am	25.125	10.8
10/25/2019 07:57:22 am	25.125	10.8
10/25/2019 08:12:22 am	25.125	10.8
10/25/2019 08:27:22 am	25.125	10.8
10/25/2019 08:42:22 am	25.125	10.8
10/25/2019 08:57:22 am	25.125	10.8
10/25/2019 09:12:22 am	25.125	10.8
10/25/2019 09:27:22 am	25.125	10.8
10/25/2019 09:42:22 am	25.125	10.8
10/25/2019 09:57:22 am	25.222	10.8
10/25/2019 10:12:22 am	25.222	10.8
10/25/2019 10:27:22 am	25.222	10.8
10/25/2019 10:42:22 am	25.319	10.8
10/25/2019 10:57:22 am	25.319	10.8
10/25/2019 11:12:22 am	25.416	21.5
10/25/2019 11:27:22 am	25.319	10.8
10/25/2019 11:42:22 am	25.222	10.8
10/25/2019 11:57:22 am	25.222	10.8
10/25/2019 12:12:22 pm	25.222	10.8
10/25/2019 12:27:22 pm	25.222	10.8
10/25/2019 12:42:22 pm	25.222	10.8
10/25/2019 12:57:22 pm	25.222	10.8
10/25/2019 01:12:22 pm	25.222	10.8
10/25/2019 01:27:22 pm	25.222	10.8
10/25/2019 01:42:22 pm	25.319	10.8
10/25/2019 01:57:22 pm	25.319	10.8
10/25/2019 02:12:22 pm	25.319	10.8
10/25/2019 02:27:22 pm	25.319	10.8
10/25/2019 02:42:22 pm	25.319	10.8
10/25/2019 02:57:22 pm	25.416	10.8
10/25/2019 03:12:22 pm	25.416	10.8
10/25/2019 03:27:22 pm	25.416	10.8
10/25/2019 03:42:22 pm	25.416	10.8
10/25/2019 03:57:22 pm	25.416	10.8
10/25/2019 04:12:22 pm	25.513	10.8
10/25/2019 04:27:22 pm	25.513	10.8
10/25/2019 04:42:22 pm	25.513	10.8
10/25/2019 04:57:22 pm	25.513	10.8
10/25/2019 05:12:22 pm	25.416	10.8
10/25/2019 05:27:22 pm	25.513	10.8
10/25/2019 05:42:22 pm	25.513	10.8
10/25/2019 05:57:22 pm	25.416	10.8
10/25/2019 06:12:22 pm	25.513	10.8
10/25/2019 06:27:22 pm	25.416	10.8
10/25/2019 06:42:22 pm	25.416	10.8
10/25/2019 06:57:22 pm	25.513	10.8
10/25/2019 07:12:22 pm	25.513	10.8
10/25/2019 07:27:22 pm	25.416	10.8
10/25/2019 07:42:22 pm	25.416	10.8
10/25/2019 07:57:22 pm	25.416	10.8
10/25/2019 08:12:22 pm	25.513	10.8
10/25/2019 08:27:22 pm	25.416	10.8
10/25/2019 08:42:22 pm	25.513	10.8
10/25/2019 08:57:22 pm	25.416	10.8
10/25/2019 09:12:22 pm	25.513	10.8
10/25/2019 09:27:22 pm	25.513	10.8
10/25/2019 09:42:22 pm	25.513	10.8
10/25/2019 09:57:22 pm	25.416	10.8
10/25/2019 10:12:22 pm	25.513	10.8
10/25/2019 10:27:22 pm	25.513	10.8
10/25/2019 10:42:22 pm	25.513	10.8
10/25/2019 10:57:22 pm	25.416	10.8
10/25/2019 11:12:22 pm	25.416	10.8
10/25/2019 11:27:22 pm	25.513	10.8
10/25/2019 11:42:22 pm	25.416	10.8
10/25/2019 11:57:22 pm	25.416	10.8
10/26/2019 12:12:22 am	25.416	10.8
10/26/2019 12:27:22 am	25.416	10.8
10/26/2019 12:42:22 am	25.416	10.8
10/26/2019 12:57:22 am	25.416	10.8
10/26/2019 01:12:22 am	25.416	10.8
10/26/2019 01:27:22 am	25.416	10.8
10/26/2019 01:42:22 am	25.416	10.8
10/26/2019 01:57:22 am	25.513	10.8
10/26/2019 02:12:22 am	25.513	10.8
10/26/2019 02:27:22 am	25.513	10.8
10/26/2019 02:42:22 am	25.416	10.8
10/26/2019 02:57:22 am	25.416	10.8
10/26/2019 03:12:22 am	25.416	10.8
10/26/2019 03:27:22 am	25.416	10.8
10/26/2019 03:42:22 am	25.416	10.8
10/26/2019 03:57:22 am	25.416	10.8
10/26/2019 04:12:22 am	25.416	10.8
10/26/2019 04:27:22 am	25.416	10.8
10/26/2019 04:42:22 am	25.416	10.8
10/26/2019 04:57:22 am	25.416	10.8
10/26/2019 05:12:22 am	25.416	10.8
10/26/2019 05:27:22 am	25.416	10.8
10/26/2019 05:42:22 am	25.416	10.8
10/26/2019 05:57:22 am	25.416	10.8
10/26/2019 06:12:22 am	25.416	10.8
10/26/2019 06:27:22 am	25.416	10.8
10/26/2019 06:42:22 am	25.416	10.8
10/26/2019 06:57:22 am	25.416	10.8
10/26/2019 07:12:22 am	25.416	10.8
10/26/2019 07:27:22 am	25.513	10.8
10/26/2019 07:42:22 am	25.416	10.8
10/26/2019 07:57:22 am	25.513	10.8
10/26/2019 08:12:22 am	25.416	10.8
10/26/2019 08:27:22 am	25.416	10.8
10/26/2019 08:42:22 am	25.416	10.8
10/26/2019 08:57:22 am	25.416	10.8
10/26/2019 09:12:22 am	25.416	10.8
10/26/2019 09:27:22 am	25.416	10.8
10/26/2019 09:42:22 am	25.416	10.8
10/26/2019 09:57:22 am	25.513	10.8
10/26/2019 10:12:22 am	25.513	10.8
10/26/2019 10:27:22 am	25.513	10.8
10/26/2019 10:42:22 am	25.513	10.8
10/26/2019 10:57:22 am	25.513	10.8
10/26/2019 11:12:22 am	25.513	10.8
10/26/2019 11:27:22 am	25.513	10.8
10/26/2019 11:42:22 am	25.513	10.8
10/26/2019 11:57:22 am	25.416	10.8
10/26/2019 12:12:22 pm	25.416	10.8
10/26/2019 12:27:22 pm	25.513	10.8
10/26/2019 12:42:22 pm	25.513	10.8
10/26/2019 12:57:22 pm	25.513	10.8
10/26/2019 01:12:22 pm	25.513	10.8
10/26/2019 01:27:22 pm	25.513	10.8
10/26/2019 01:42:22 pm	25.513	10.8
10/26/2019 01:57:22 pm	25.513	10.8
10/26/2019 02:12:22 pm	25.513	10.8
10/26/2019 02:27:22 pm	25.513	10.8
10/26/2019 02:42:22 pm	25.513	10.8
10/26/2019 02:57:22 pm	25.513	10.8
10/26/2019 03:12:22 pm	25.513	10.8
10/26/2019 03:27:22 pm	25.513	10.8
10/26/2019 03:42:22 pm	25.513	10.8
10/26/2019 03:57:22 pm	25.513	10.8
10/26/2019 04:12:22 pm	25.513	10.8
10/26/2019 04:27:22 pm	25.513	10.8
10/26/2019 04:42:22 pm	25.513	10.8
10/26/2019 04:57:22 pm	25.513	10.8
10/26/2019 05:12:22 pm	25.513	10.8
10/26/2019 05:27:22 pm	25.513	10.8
10/26/2019 05:42:22 pm	25.513	10.8
10/26/2019 05:57:22 pm	25.513	10.8
10/26/2019 06:12:22 pm	25.513	10.8
10/26/2019 06:27:22 pm	25.513	10.8
10/26/2019 06:42:22 pm	25.513	10.8
10/26/2019 06:57:22 pm	25.513	10.8
10/26/2019 07:12:22 pm	25.513	10.8
10/26/2019 07:27:22 pm	25.513	10.8
10/26/2019 07:42:22 pm	25.513	10.8
10/26/2019 07:57:22 pm	25.513	10.8
10/26/2019 08:12:22 pm	25.513	10.8
10/26/2019 08:27:22 pm	25.513	10.8
10/26/2019 08:42:22 pm	25.513	10.8
10/26/2019 08:57:22 pm	25.513	10.8
10/26/2019 09:12:22 pm	25.513	10.8
10/26/2019 09:27:22 pm	25.513	10.8
10/26/2019 09:42:22 pm	25.513	10.8
10/26/2019 09:57:22 pm	25.513	10.8
10/26/2019 10:12:22 pm	25.513	10.8
10/26/2019 10:27:22 pm	25.513	10.8
10/26/2019 10:42:22 pm	25.513	10.8
10/26/2019 10:57:22 pm	25.513	10.8
10/26/2019 11:12:22 pm	25.513	10.8
10/26/2019 11:27:22 pm	25.513	10.8
10/26/2019 11:42:22 pm	25.513	10.8
10/26/2019 11:57:22 pm	25.513	10.8
10/27/2019 12:12:22 am	25.513	10.8
10/27/2019 12:27:22 am	25.513	10.8
10/27/2019 12:42:22 am	25.416	10.8
10/27/2019 12:57:22 am	25.416	10.8
10/27/2019 01:12:22 am	25.416	10.8
10/27/2019 01:27:22 am	25.416	10.8
10/27/2019 01:42:22 am	25.416	10.8
10/27/2019 01:57:22 am	25.416	10.8
10/27/2019 02:12:22 am	25.416	10.8
10/27/2019 02:27:22 am	25.416	10.8
10/27/2019 02:42:22 am	25.416	10.8
10/27/2019 02:57:22 am	25.416	10.8
10/27/2019 03:12:22 am	25.416	10.8
10/27/2019 03:27:22 am	25.416	10.8
10/27/2019 03:42:22 am	25.416	10.8
10/27/2019 03:57:22 am	25.416	10.8
10/27/2019 04:12:22 am	25.416	10.8
10/27/2019 04:27:22 am	25.416	10.8
10/27/2019 04:42:22 am	25.416	10.8
10/27/2019 04:57:22 am	25.416	10.8
10/27/2019 05:12:22 am	25.416	10.8
10/27/2019 05:27:22 am	25.416	10.8
10/27/2019 05:42:22 am	25.416	10.8
10/27/2019 05:57:22 am	25.416	10.8
10/27/2019 06:12:22 am	25.416	10.8
10/27/2019 06:27:22 am	25.416	10.8
10/27/2019 06:42:22 am	25.416	10.8
10/27/2019 06:57:22 am	25.416	10.8
10/27/2019 07:12:22 am	25.416	10.8
10/27/2019 07:27:22 am	25.416	10.8
10/27/2019 07:42:22 am	25.416	10.8
10/27/2019 07:57:22 am	25.416	10.8
10/27/2019 08:12:22 am	25.416	10.8
10/27/2019 08:27:22 am	25.416	10.8
10/27/2019 08:42:22 am	25.416	10.8
10/27/2019 08:57:22 am	25.416	10.8
10/27/2019 09:12:22 am	25.416	10.8
10/27/2019 09:27:22 am	25.513	10.8
10/27/2019 09:42:22 am	25.416	10.8
10/27/2019 09:57:22 am	25.416	10.8
10/27/2019 10:12:22 am	25.416	10.8
10/27/2019 10:27:22 am	25.416	10.8
10/27/2019 10:42:22 am	25.513	21.5
10/27/2019 10:57:22 am	25.513	10.8
10/27/2019 11:12:22 am	25.513	10.8
10/27/2019 11:27:22 am	25.513	10.8
10/27/2019 11:42:22 am	25.513	10.8
10/27/2019 11:57:22 am	25.513	10.8
10/27/2019 12:12:22 pm	25.513	10.8
10/27/2019 12:27:22 pm	25.513	10.8
10/27/2019 12:42:22 pm	25.513	10.8
10/27/2019 12:57:22 pm	25.416	10.8
10/27/2019 01:12:22 pm	25.416	10.8
10/27/2019 01:27:22 pm	25.416	10.8
10/27/2019 01:42:22 pm	25.416	10.8
10/27/2019 01:57:22 pm	25.416	10.8
10/27/2019 02:12:22 pm	25.416	10.8
10/27/2019 02:27:22 pm	25.416	10.8
10/27/2019 02:42:22 pm	25.416	10.8
10/27/2019 02:57:22 pm	25.416	10.8
10/27/2019 03:12:22 pm	25.416	10.8
10/27/2019 03:27:22 pm	25.416	10.8
10/27/2019 03:42:22 pm	25.416	10.8
10/27/2019 03:57:22 pm	25.416	10.8
10/27/2019 04:12:22 pm	25.416	10.8
10/27/2019 04:27:22 pm	25.416	10.8
10/27/2019 04:42:22 pm	25.416	10.8
10/27/2019 04:57:22 pm	25.416	10.8
10/27/2019 05:12:22 pm	25.416	10.8
10/27/2019 05:27:22 pm	25.416	10.8
10/27/2019 05:42:22 pm	25.416	10.8
10/27/2019 05:57:22 pm	25.416	10.8
10/27/2019 06:12:22 pm	25.416	10.8
10/27/2019 06:27:22 pm	25.416	10.8
10/27/2019 06:42:22 pm	25.416	10.8
10/27/2019 06:57:22 pm	25.416	10.8
10/27/2019 07:12:22 pm	25.416	10.8
10/27/2019 07:27:22 pm	25.416	10.8
10/27/2019 07:42:22 pm	25.416	10.8
10/27/2019 07:57:22 pm	25.416	10.8
10/27/2019 08:12:22 pm	25.416	10.8
10/27/2019 08:27:22 pm	25.513	10.8
10/27/2019 08:42:22 pm	25.416	10.8
10/27/2019 08:57:22 pm	25.416	10.8
10/27/2019 09:12:22 pm	25.416	10.8
10/27/2019 09:27:22 pm	25.416	10.8
10/27/2019 09:42:22 pm	25.416	10.8
10/27/2019 09:57:22 pm	25.416	10.8
10/27/2019 10:12:22 pm	25.416	10.8
10/27/2019 10:27:22 pm	25.416	10.8
10/27/2019 10:42:22 pm	25.416	10.8
10/27/2019 10:57:22 pm	25.416	10.8
10/27/2019 11:12:22 pm	25.416	10.8
10/27/2019 11:27:22 pm	25.416	10.8
10/27/2019 11:42:22 pm	25.416	10.8
10/27/2019 11:57:22 pm	25.416	10.8
10/28/2019 12:12:22 am	25.416	10.8
10/28/2019 12:27:22 am	25.416	10.8
10/28/2019 12:42:22 am	25.416	10.8
10/28/2019 12:57:22 am	25.416	10.8
10/28/2019 01:12:22 am	25.416	10.8
10/28/2019 01:27:22 am	25.416	10.8
10/28/2019 01:42:22 am	25.416	10.8
10/28/2019 01:57:22 am	25.416	10.8
10/28/2019 02:12:22 am	25.416	10.8
10/28/2019 02:27:22 am	25.416	10.8
10/28/2019 02:42:22 am	25.416	10.8
10/28/2019 02:57:22 am	25.416	10.8
10/28/2019 03:12:22 am	25.416	10.8
10/28/2019 03:27:22 am	25.416	10.8
10/28/2019 03:42:22 am	25.416	10.8
10/28/2019 03:57:22 am	25.416	10.8
10/28/2019 04:12:22 am	25.416	10.8
10/28/2019 04:27:22 am	25.416	10.8
10/28/2019 04:42:22 am	25.416	10.8
10/28/2019 04:57:22 am	25.416	10.8
10/28/2019 05:12:22 am	25.416	10.8
10/28/2019 05:27:22 am	25.416	10.8
10/28/2019 05:42:22 am	25.416	10.8
10/28/2019 05:57:22 am	25.416	10.8
10/28/2019 06:12:22 am	25.416	10.8
10/28/2019 06:27:22 am	25.416	10.8
10/28/2019 06:42:22 am	25.416	10.8
10/28/2019 06:57:22 am	25.416	10.8
10/28/2019 07:12:22 am	25.416	10.8
10/28/2019 07:27:22 am	25.416	10.8
10/28/2019 07:42:22 am	25.416	10.8
10/28/2019 07:57:22 am	25.416	10.8
10/28/2019 08:12:22 am	25.416	10.8
10/28/2019 08:27:22 am	25.416	10.8
10/28/2019 08:42:22 am	25.416	10.8
10/28/2019 08:57:22 am	25.416	10.8
10/28/2019 09:12:22 am	25.416	10.8
10/28/2019 09:27:22 am	25.513	10.8
10/28/2019 09:42:22 am	25.513	10.8
10/28/2019 09:57:22 am	25.416	10.8
10/28/2019 10:12:22 am	25.416	10.8
10/28/2019 10:27:22 am	25.416	10.8
10/28/2019 10:42:22 am	25.513	10.8
10/28/2019 10:57:22 am	25.416	10.8
10/28/2019 11:12:22 am	25.513	10.8
10/28/2019 11:27:22 am	25.416	10.8
10/28/2019 11:42:22 am	25.416	10.8
10/28/2019 11:57:22 am	25.416	21.5
10/28/2019 12:12:22 pm	25.513	21.5
10/28/2019 12:27:22 pm	25.513	10.8
10/28/2019 12:42:22 pm	25.513	10.8
10/28/2019 12:57:22 pm	25.513	10.8
10/28/2019 01:12:22 pm	25.416	10.8
10/28/2019 01:27:22 pm	25.416	10.8
10/28/2019 01:42:22 pm	25.416	10.8
10/28/2019 01:57:22 pm	25.416	10.8
10/28/2019 02:12:22 pm	25.416	10.8
10/28/2019 02:27:22 pm	25.416	10.8
10/28/2019 02:42:22 pm	25.513	10.8
10/28/2019 02:57:22 pm	25.416	10.8
10/28/2019 03:12:22 pm	25.416	10.8
10/28/2019 03:27:22 pm	25.319	10.8
10/28/2019 03:42:22 pm	25.319	10.8
10/28/2019 03:57:22 pm	25.319	10.8
10/28/2019 04:12:22 pm	25.319	10.8
10/28/2019 04:27:22 pm	25.319	10.8
10/28/2019 04:42:22 pm	25.319	10.8
10/28/2019 04:57:22 pm	25.319	10.8
10/28/2019 05:12:22 pm	25.319	10.8
10/28/2019 05:27:22 pm	25.319	10.8
10/28/2019 05:42:22 pm	25.319	10.8
10/28/2019 05:57:22 pm	25.319	10.8
10/28/2019 06:12:22 pm	25.319	10.8
10/28/2019 06:27:22 pm	25.319	10.8
10/28/2019 06:42:22 pm	25.319	10.8
10/28/2019 06:57:22 pm	25.319	10.8
10/28/2019 07:12:22 pm	25.319	10.8
10/28/2019 07:27:22 pm	25.319	10.8
10/28/2019 07:42:22 pm	25.319	10.8
10/28/2019 07:57:22 pm	25.319	10.8
10/28/2019 08:12:22 pm	25.319	10.8
10/28/2019 08:27:22 pm	25.319	10.8
10/28/2019 08:42:22 pm	25.319	10.8
10/28/2019 08:57:22 pm	25.319	10.8
10/28/2019 09:12:22 pm	25.319	10.8
10/28/2019 09:27:22 pm	25.319	10.8
10/28/2019 09:42:22 pm	25.319	10.8
10/28/2019 09:57:22 pm	25.319	10.8
10/28/2019 10:12:22 pm	25.319	10.8
10/28/2019 10:27:22 pm	25.319	10.8
10/28/2019 10:42:22 pm	25.319	10.8
10/28/2019 10:57:22 pm	25.319	10.8
10/28/2019 11:12:22 pm	25.319	10.8
10/28/2019 11:27:22 pm	25.319	10.8
10/28/2019 11:42:22 pm	25.319	10.8
10/28/2019 11:57:22 pm	25.319	10.8
10/29/2019 12:12:22 am	25.319	10.8
10/29/2019 12:27:22 am	25.319	10.8
10/29/2019 12:42:22 am	25.319	10.8
10/29/2019 12:57:22 am	25.319	10.8
10/29/2019 01:12:22 am	25.319	10.8
10/29/2019 01:27:22 am	25.319	10.8
10/29/2019 01:42:22 am	25.319	10.8
10/29/2019 01:57:22 am	25.319	10.8
10/29/2019 02:12:22 am	25.222	10.8
10/29/2019 02:27:22 am	25.319	10.8
10/29/2019 02:42:22 am	25.222	10.8
10/29/2019 02:57:22 am	25.222	10.8
10/29/2019 03:12:22 am	25.222	10.8
10/29/2019 03:27:22 am	25.222	10.8
10/29/2019 03:42:22 am	25.222	10.8
10/29/2019 03:57:22 am	25.222	10.8
10/29/2019 04:12:22 am	25.222	10.8
10/29/2019 04:27:22 am	25.222	10.8
10/29/2019 04:42:22 am	25.222	10.8
10/29/2019 04:57:22 am	25.222	10.8
10/29/2019 05:12:22 am	25.222	10.8
10/29/2019 05:27:22 am	25.222	10.8
10/29/2019 05:42:22 am	25.222	10.8
10/29/2019 05:57:22 am	25.222	10.8
10/29/2019 06:12:22 am	25.222	10.8
10/29/2019 06:27:22 am	25.222	10.8
10/29/2019 06:42:22 am	25.222	10.8
10/29/2019 06:57:22 am	25.222	10.8
10/29/2019 07:12:22 am	25.222	10.8
10/29/2019 07:27:22 am	25.222	10.8
10/29/2019 07:42:22 am	25.222	10.8
10/29/2019 07:57:22 am	25.222	10.8
10/29/2019 08:12:22 am	25.222	10.8
10/29/2019 08:27:22 am	25.222	10.8
10/29/2019 08:42:22 am	25.222	10.8
10/29/2019 08:57:22 am	25.222	10.8
10/29/2019 09:12:22 am	25.222	10.8
10/29/2019 09:27:22 am	25.222	10.8
10/29/2019 09:42:22 am	25.222	10.8
10/29/2019 09:57:22 am	25.222	10.8
10/29/2019 10:12:22 am	25.222	10.8
10/29/2019 10:27:22 am	25.319	10.8
10/29/2019 10:42:22 am	25.319	10.8
10/29/2019 10:57:22 am	25.319	10.8
10/29/2019 11:12:22 am	25.319	10.8
10/29/2019 11:27:22 am	25.222	10.8
10/29/2019 11:42:22 am	25.319	10.8
10/29/2019 11:57:22 am	25.222	10.8
10/29/2019 12:12:22 pm	25.222	10.8
10/29/2019 12:27:22 pm	25.319	10.8
10/29/2019 12:42:22 pm	25.319	10.8
10/29/2019 12:57:22 pm	25.319	10.8
10/29/2019 01:12:22 pm	25.319	10.8
10/29/2019 01:27:22 pm	25.319	10.8
10/29/2019 01:42:22 pm	25.416	10.8
10/29/2019 01:57:22 pm	25.416	10.8
10/29/2019 02:12:22 pm	25.416	10.8
10/29/2019 02:27:22 pm	25.513	10.8
10/29/2019 02:42:22 pm	25.416	21.5
10/29/2019 02:57:22 pm	25.319	10.8
10/29/2019 03:12:22 pm	25.222	10.8
10/29/2019 03:27:22 pm	25.222	10.8
10/29/2019 03:42:22 pm	25.222	10.8
10/29/2019 03:57:22 pm	25.222	10.8
10/29/2019 04:12:22 pm	25.222	10.8
10/29/2019 04:27:22 pm	25.222	10.8
10/29/2019 04:42:22 pm	25.222	10.8
10/29/2019 04:57:22 pm	25.222	10.8
10/29/2019 05:12:22 pm	25.222	10.8
10/29/2019 05:27:22 pm	25.222	10.8
10/29/2019 05:42:22 pm	25.222	10.8
10/29/2019 05:57:22 pm	25.222	10.8
10/29/2019 06:12:22 pm	25.222	10.8
10/29/2019 06:27:22 pm	25.222	10.8
10/29/2019 06:42:22 pm	25.222	10.8
10/29/2019 06:57:22 pm	25.222	10.8
10/29/2019 07:12:22 pm	25.222	10.8
10/29/2019 07:27:22 pm	25.222	10.8
10/29/2019 07:42:22 pm	25.222	10.8
10/29/2019 07:57:22 pm	25.222	10.8
10/29/2019 08:12:22 pm	25.222	10.8
10/29/2019 08:27:22 pm	25.222	10.8
10/29/2019 08:42:22 pm	25.222	10.8
10/29/2019 08:57:22 pm	25.222	10.8
10/29/2019 09:12:22 pm	25.222	10.8
10/29/2019 09:27:22 pm	25.222	10.8
10/29/2019 09:42:22 pm	25.222	10.8
10/29/2019 09:57:22 pm	25.222	10.8
10/29/2019 10:12:22 pm	25.222	10.8
10/29/2019 10:27:22 pm	25.222	10.8
10/29/2019 10:42:22 pm	25.222	10.8
10/29/2019 10:57:22 pm	25.222	10.8
10/29/2019 11:12:22 pm	25.222	10.8
10/29/2019 11:27:22 pm	25.222	10.8
10/29/2019 11:42:22 pm	25.222	10.8
10/29/2019 11:57:22 pm	25.222	10.8
10/30/2019 12:12:22 am	25.222	10.8
10/30/2019 12:27:22 am	25.125	10.8
10/30/2019 12:42:22 am	25.125	10.8
10/30/2019 12:57:22 am	25.125	10.8
10/30/2019 01:12:22 am	25.125	10.8
10/30/2019 01:27:22 am	25.222	10.8
10/30/2019 01:42:22 am	25.222	10.8
10/30/2019 01:57:22 am	25.125	10.8
10/30/2019 02:12:22 am	25.125	10.8
10/30/2019 02:27:22 am	25.125	10.8
10/30/2019 02:42:22 am	25.125	10.8
10/30/2019 02:57:22 am	25.125	10.8
10/30/2019 03:12:22 am	25.125	10.8
10/30/2019 03:27:22 am	25.125	10.8
10/30/2019 03:42:22 am	25.125	10.8
10/30/2019 03:57:22 am	25.125	10.8
10/30/2019 04:12:22 am	25.125	10.8
10/30/2019 04:27:22 am	25.125	10.8
10/30/2019 04:42:22 am	25.125	10.8
10/30/2019 04:57:22 am	25.125	10.8
10/30/2019 05:12:22 am	25.125	10.8
10/30/2019 05:27:22 am	25.125	10.8
10/30/2019 05:42:22 am	25.222	10.8
10/30/2019 05:57:22 am	25.222	10.8
10/30/2019 06:12:22 am	25.222	10.8
10/30/2019 06:27:22 am	25.222	10.8
10/30/2019 06:42:22 am	25.125	10.8
10/30/2019 06:57:22 am	25.125	10.8
10/30/2019 07:12:22 am	25.125	10.8
10/30/2019 07:27:22 am	25.125	10.8
10/30/2019 07:42:22 am	25.125	10.8
10/30/2019 07:57:22 am	25.125	10.8
10/30/2019 08:12:22 am	25.125	10.8
10/30/2019 08:27:22 am	25.125	10.8
10/30/2019 08:42:22 am	25.125	10.8
10/30/2019 08:57:22 am	25.125	10.8
10/30/2019 09:12:22 am	25.125	10.8
10/30/2019 09:27:22 am	25.125	10.8
10/30/2019 09:42:22 am	25.125	10.8
10/30/2019 09:57:22 am	25.125	10.8
10/30/2019 10:12:22 am	25.125	32.3
10/30/2019 10:27:22 am	25.222	32.3
10/30/2019 10:42:22 am	25.319	32.3
10/30/2019 10:57:22 am	25.319	32.3
10/30/2019 11:12:22 am	25.319	32.3
10/30/2019 11:27:22 am	25.319	32.3
10/30/2019 11:42:22 am	25.416	32.3
10/30/2019 11:57:22 am	25.319	32.3
10/30/2019 12:12:22 pm	25.416	32.3
10/30/2019 12:27:22 pm	25.416	32.3
10/30/2019 12:42:22 pm	25.416	32.3
10/30/2019 12:57:22 pm	25.319	32.3
10/30/2019 01:12:22 pm	25.319	32.3
10/30/2019 01:27:22 pm	25.319	32.3
10/30/2019 01:42:22 pm	25.222	32.3
10/30/2019 01:57:22 pm	25.222	32.3
10/30/2019 02:12:22 pm	25.222	32.3
10/30/2019 02:27:22 pm	25.222	32.3
10/30/2019 02:42:22 pm	25.319	32.3
10/30/2019 02:57:22 pm	25.319	32.3
10/30/2019 03:12:22 pm	25.319	32.3
10/30/2019 03:27:22 pm	25.319	32.3
10/30/2019 03:42:22 pm	25.319	32.3
10/30/2019 03:57:22 pm	25.319	32.3
10/30/2019 04:12:22 pm	25.319	32.3
10/30/2019 04:27:22 pm	25.319	32.3
10/30/2019 04:42:22 pm	25.319	32.3
10/30/2019 04:57:22 pm	25.319	32.3
10/30/2019 05:12:22 pm	25.319	32.3
10/30/2019 05:27:22 pm	25.319	10.8
10/30/2019 05:42:22 pm	25.319	10.8
10/30/2019 05:57:22 pm	25.416	10.8
10/30/2019 06:12:22 pm	25.319	10.8
10/30/2019 06:27:22 pm	25.319	10.8
10/30/2019 06:42:22 pm	25.319	10.8
10/30/2019 06:57:22 pm	25.319	10.8
10/30/2019 07:12:22 pm	25.319	10.8
10/30/2019 07:27:22 pm	25.222	10.8
10/30/2019 07:42:22 pm	25.222	10.8
10/30/2019 07:57:22 pm	25.222	10.8

## Sheet: Video_d1
	Procedural and solvent blank	Replicat
		1	2	3	4	5	6	7	8
	Av. Speed (mm/s)	61.1174	5.29595	2.29129	1.22994	0.186383	16.4717	29.093	33.5599
	Mob. Av. Speed (mm/s)	62.6016	8.18086	5.95493	6.29427	1.19046	20.2832	32.1095	36.0112
	Av. Accel (mm/s^2)	69.7877	9.36665	4.63738	4.29264	1.34106	21.8613	29.1489	41.8946
	Mobility Rate (%)	0.976121	0.633938	0.359792	0.176761	0.0429562	0.803051	0.900876	0.931163
	Visible Frames	7500	7500	7500	7500	7500	7280	7197	7500
	Visible Time (m:s)	0:05:00	0:05:00	0:05:00	0:05:00	0:05:00	0:04:51.200000	0:04:47.880000	0:05:00
	Invisible Frames	0	0	0	0	0	220	303	0
	Invisible Time (m:s)	0:00:00	0:00:00	0:00:00	0:00:00	0:00:00	0:00:08.800000	0:00:12.120000	0:00:00
	First Visible Frame	7500	7500	7500	7500	7500	7500	7500	7500
	Last Visible Frame	14999	14999	14999	14999	14999	14999	14999	14999
	Visibility Rate (%)	1	1	1	1	1	0.970667	0.9596	1
	Invisibility Rate (%)	0	0	0	0	0	0.0293333	0.0404	0
	Explored Areas	4	7	4	4	1	7	4	6
	Number of Areas	9	9	9	9	9	9	9	9
	Exploration Rate (%)	0.444444	0.777778	0.444444	0.444444	0.111111	0.777778	0.444444	0.666667
	Total Distance (mm)	18415.5	1614.69	710.387	395.117	70.531	4971.48	8764.84	10112.8
	Transitions In	0	0	0	0	0	0	0	0
	Transitions Out	0	0	0	0	0	0	0	0
	Frozen Events	1	7	12	6	1	7	4	2
	Tot. Time Frozen (m:s)	0:00:05.320000	0:01:59	0:03:33	0:04:27.760000	0:04:59.960000	0:01:04.200000	0:00:27.040000	0:00:15.320000
	Avg. Time Frozen (m:s)	0:00:05.320000	0:00:17	0:00:17.750000	0:00:44.627000	0:04:59.960000	0:00:09.171000	0:00:06.760000	0:00:07.660000
	NC	Replicat
		1	2	3	4	5	6	7	8
	Av. Speed (mm/s)	6.60731	17.3301	31.6224	1.81602	0.476046	46.7031	2.22982	30.2706
	Mob. Av. Speed (mm/s)	14.008	21.9921	33.9998	4.48211	2.94265	47.4446	12.2519	31.2996
	Av. Accel (mm/s^2)	12.2159	32.7504	38.1393	5.35167	1.86913	59.3835	4.83359	41.1819
	Mobility Rate (%)	0.458933	0.783744	0.92787	0.36793	0.108591	0.984133	0.158936	0.966465
	Visible Frames	7443	7472	7338	7500	7500	7441	7334	7459
	Visible Time (m:s)	0:04:57.720000	0:04:58.880000	0:04:53.520000	0:05:00	0:05:00	0:04:57.640000	0:04:53.360000	0:04:58.360000
	Invisible Frames	57	28	162	0	0	59	166	41
	Invisible Time (m:s)	0:00:02.280000	0:00:01.120000	0:00:06.480000	0:00:00	0:00:00	0:00:02.360000	0:00:06.640000	0:00:01.640000
	First Visible Frame	7500	7500	7500	7500	7500	7500	7500	7500
	Last Visible Frame	14999	14999	14999	14999	14999	14999	14999	14999
	Visibility Rate (%)	0.9924	0.996267	0.9784	1	1	0.992133	0.977867	0.994533
	Invisibility Rate (%)	0.0076	0.00373333	0.0216	0	0	0.00786667	0.0221333	0.00546667
	Explored Areas	4	8	4	4	2	8	4	4
	Number of Areas	9	9	9	9	9	9	9	9
	Exploration Rate (%)	0.444444	0.888889	0.444444	0.444444	0.222222	0.888889	0.444444	0.444444
	Total Distance (mm)	2011.12	5232.62	9535.55	572.102	162.172	14090.2	680.666	9130.76
	Transitions In	0	0	0	0	0	0	0	0
	Transitions Out	0	0	0	0	0	0	0	0
	Frozen Events	11	10	2	12	5	1	2	0
	Tot. Time Frozen (m:s)	0:02:59.280000	0:01:14.600000	0:00:09.560000	0:04:01.560000	0:04:48.920000	0:00:04.240000	0:04:09.200000	0:00:00
	Avg. Time Frozen (m:s)	0:00:16.298000	0:00:07.460000	0:00:04.780000	0:00:20.130000	0:00:57.784000	0:00:04.240000	0:02:04.600000	0:00:00
	PC	Replicat
		1	2	3	4	5	6	7	8
	Av. Speed (mm/s)	0.269018	0.356266	0.185597	1.93897	0.0164648	0.286412	1.85922	17.1468
	Mob. Av. Speed (mm/s)	1.18543	1.12529	0	5.01906	1.10516	1.55257	10.4116	21.4089
	Av. Accel (mm/s^2)	1.57992	2.14837	0.892169	4.97668	0.100783	1.74267	3.52212	32.1891
	Mobility Rate (%)	0.0709712	0.214514	0	0.342983	0.0029349	0.0829776	0.158051	0.797225
	Visible Frames	7500	7500	7500	7500	7500	7500	7432	7500
	Visible Time (m:s)	0:05:00	0:05:00	0:05:00	0:05:00	0:05:00	0:05:00	0:04:57.280000	0:05:00
	Invisible Frames	0	0	0	0	0	0	68	0
	Invisible Time (m:s)	0:00:00	0:00:00	0:00:00	0:00:00	0:00:00	0:00:00	0:00:02.720000	0:00:00
	First Visible Frame	7500	7500	7500	7500	7500	7500	7500	7500
	Last Visible Frame	14999	14999	14999	14999	14999	14999	14999	14999
	Visibility Rate (%)	1	1	1	1	1	1	0.990933	1
	Invisibility Rate (%)	0	0	0	0	0	0	0.00906667	0
	Explored Areas	1	1	1	6	1	1	5	7
	Number of Areas	9	9	9	9	9	9	9	9
	Exploration Rate (%)	0.111111	0.111111	0.111111	0.666667	0.111111	0.111111	0.555556	0.777778
	Total Distance (mm)	121.701	171.272	88.2854	626.03	6.92632	110.783	583.344	5177.66
	Transitions In	0	0	0	0	0	0	0	0
	Transitions Out	0	0	0	0	0	0	0	0
	Frozen Events	1	2	1	13	1	3	3	9
	Tot. Time Frozen (m:s)	0:04:59.960000	0:04:59.920000	0:04:59.960000	0:03:52.600000	0:04:59.960000	0:04:59.880000	0:04:24.160000	0:00:49.240000
	Avg. Time Frozen (m:s)	0:04:59.960000	0:02:29.960000	0:04:59.960000	0:00:17.892000	0:04:59.960000	0:01:39.960000	0:01:28.053000	0:00:05.471000
	0.4 g/L	Replicat
		1	2	3	4	5	6	7	8
	Av. Speed (mm/s)	5.53135	20.791	19.3007	4.33981	1.50287	6.30376	16.2129	3.1209
	Mob. Av. Speed (mm/s)	7.52666	21.7134	22.0109	7.35193	4.27267	11.2174	17.6054	5.93374
	Av. Accel (mm/s^2)	6.86236	37.8676	47.1573	8.57286	4.32589	13.7443	26.5177	6.51096
	Mobility Rate (%)	0.713989	0.956644	0.874466	0.570304	0.293155	0.553629	0.913478	0.509872
	Visible Frames	7224	7500	7500	7500	7338	7500	7008	7500
	Visible Time (m:s)	0:04:48.960000	0:05:00	0:05:00	0:05:00	0:04:53.520000	0:05:00	0:04:40.320000	0:05:00
	Invisible Frames	276	0	0	0	162	0	492	0
	Invisible Time (m:s)	0:00:11.040000	0:00:00	0:00:00	0:00:00	0:00:06.480000	0:00:00	0:00:19.680000	0:00:00
	First Visible Frame	7500	7500	7500	7500	7500	7500	7500	7500
	Last Visible Frame	14999	14999	14999	14999	14999	14999	14999	14999
	Visibility Rate (%)	0.9632	1	1	1	0.9784	1	0.9344	1
	Invisibility Rate (%)	0.0368	0	0	0	0.0216	0	0.0656	0
	Explored Areas	4	7	4	6	4	5	5	6
	Number of Areas	9	9	9	9	9	9	9	9
	Exploration Rate (%)	0.444444	0.777778	0.444444	0.666667	0.444444	0.555556	0.555556	0.666667
	Total Distance (mm)	1672.93	6263.21	5829.35	1320.32	484.017	1918.42	4898.84	970.278
	Transitions In	0	0	0	0	0	0	0	0
	Transitions Out	0	0	0	0	0	0	0	0
	Frozen Events	6	1	3	11	10	5	3	9
	Tot. Time Frozen (m:s)	0:01:15.680000	0:00:03.880000	0:00:17	0:02:23.320000	0:04:16.360000	0:02:15.880000	0:00:15.880000	0:02:50.040000
	Avg. Time Frozen (m:s)	0:00:12.613000	0:00:03.880000	0:00:05.667000	0:00:13.029000	0:00:25.636000	0:00:27.176000	0:00:05.293000	0:00:18.893000
	1 g/L	Replicat
		1	2	3	4	5	6	7	8
	Av. Speed (mm/s)	18.9502	1.52027	1.18711	0.32628	8.40317	0.307358	15.7776	9.84481
	Mob. Av. Speed (mm/s)	19.8345	6.42004	3.95381	2.08047	11.8135	2.25428	18.402	15.7605
	Av. Accel (mm/s^2)	28.2458	3.19181	4.43134	1.53627	15.666	1.58593	19.9324	14.2509
	Mobility Rate (%)	0.95407	0.221852	0.26294	0.0697705	0.703308	0.0632337	0.843418	0.618997
	Visible Frames	7363	7500	7500	7500	7500	7500	6978	7500
	Visible Time (m:s)	0:04:54.520000	0:05:00	0:05:00	0:05:00	0:05:00	0:05:00	0:04:39.120000	0:05:00
	Invisible Frames	137	0	0	0	0	0	522	0
	Invisible Time (m:s)	0:00:05.480000	0:00:00	0:00:00	0:00:00	0:00:00	0:00:00	0:00:20.880000	0:00:00
	First Visible Frame	7500	7500	7500	7500	7500	7500	7500	7500
	Last Visible Frame	14999	14999	14999	14999	14999	14999	14999	14999
	Visibility Rate (%)	0.981733	1	1	1	1	1	0.9304	1
	Invisibility Rate (%)	0.0182667	0	0	0	0	0	0.0696	0
	Explored Areas	5	6	3	1	7	3	4	5
	Number of Areas	9	9	9	9	9	9	9	9
	Exploration Rate (%)	0.555556	0.666667	0.333333	0.111111	0.777778	0.333333	0.444444	0.555556
	Total Distance (mm)	5699.99	475.342	381.799	123.468	2570.43	117.768	4757.16	2980.08
	Transitions In	0	0	0	0	0	0	0	0
	Transitions Out	0	0	0	0	0	0	0	0
	Frozen Events	2	7	9	3	10	4	7	12
	Tot. Time Frozen (m:s)	0:00:09.680000	0:04:15.760000	0:04:07.440000	0:04:48.520000	0:01:43.320000	0:04:50.600000	0:00:51.240000	0:01:56.520000
	Avg. Time Frozen (m:s)	0:00:04.840000	0:00:36.537000	0:00:27.493000	0:01:36.173000	0:00:10.332000	0:01:12.650000	0:00:07.320000	0:00:09.710000
	2.5 g/L	Replicat
		1	2	3	4	5	6	7	8
	Av. Speed (mm/s)	21.4105	22.0676	10.711	32.5165	43.1917	11.1892	41.9155	23.2286
	Mob. Av. Speed (mm/s)	27.1598	23.1599	12.0765	34.3678	49.4459	16.7834	45.6397	24.3475
	Av. Accel (mm/s^2)	37.8086	28.8588	20.451	45.7381	53.8438	22.9834	59.3563	39.4688
	Mobility Rate (%)	0.77859	0.951249	0.873176	0.945374	0.862377	0.659751	0.915201	0.953308
	Visible Frames	7253	7409	6927	7473	6936	7475	7280	7500
	Visible Time (m:s)	0:04:50.120000	0:04:56.360000	0:04:37.080000	0:04:58.920000	0:04:37.440000	0:04:59	0:04:51.200000	0:05:00
	Invisible Frames	247	91	573	27	564	25	220	0
	Invisible Time (m:s)	0:00:09.880000	0:00:03.640000	0:00:22.920000	0:00:01.080000	0:00:22.560000	0:00:01	0:00:08.800000	0:00:00
	First Visible Frame	7500	7500	7500	7500	7500	7500	7500	7500
	Last Visible Frame	14999	14999	14999	14999	14999	14999	14999	14999
	Visibility Rate (%)	0.967067	0.987867	0.9236	0.9964	0.9248	0.996667	0.970667	1
	Invisibility Rate (%)	0.0329333	0.0121333	0.0764	0.0036	0.0752	0.00333333	0.0293333	0
	Explored Areas	4	8	6	7	5	8	8	6
	Number of Areas	9	9	9	9	9	9	9	9
	Exploration Rate (%)	0.444444	0.888889	0.666667	0.777778	0.555556	0.888889	0.888889	0.666667
	Total Distance (mm)	6464.86	6652.01	3239.7	9810.13	13078.4	3393.13	12643.3	6996.48
	Transitions In	0	0	0	0	0	0	0	0
	Transitions Out	0	0	0	0	0	0	0	0
	Frozen Events	9	1	4	2	4	12	3	2
	Tot. Time Frozen (m:s)	0:01:10.520000	0:00:07.240000	0:00:22.600000	0:00:11.840000	0:00:38.880000	0:01:55.680000	0:00:16.120000	0:00:10.560000
	Avg. Time Frozen (m:s)	0:00:07.836000	0:00:07.240000	0:00:05.650000	0:00:05.920000	0:00:09.720000	0:00:09.640000	0:00:05.373000	0:00:05.280000
	6.25 g/L	Replicat
		1	2	3	4	5	6	7	8
	Av. Speed (mm/s)	7.31982	1.76507	1.00498	3.9332	8.27203	0.166319	29.7841	0.420149
	Mob. Av. Speed (mm/s)	11.8162	6.73658	5.28208	7.74686	10.4554	1.82264	30.5034	2.18746
	Av. Accel (mm/s^2)	12.3421	5.21918	3.02911	8.42462	15.503	1.02783	47.5886	2.24098
	Mobility Rate (%)	0.612727	0.243597	0.158751	0.482524	0.782503	0.030016	0.975873	0.128202
	Visible Frames	7500	7500	7500	7500	7388	7500	7423	7500
	Visible Time (m:s)	0:05:00	0:05:00	0:05:00	0:05:00	0:04:55.520000	0:05:00	0:04:56.920000	0:05:00
	Invisible Frames	0	0	0	0	112	0	77	0
	Invisible Time (m:s)	0:00:00	0:00:00	0:00:00	0:00:00	0:00:04.480000	0:00:00	0:00:03.080000	0:00:00
	First Visible Frame	7500	7500	7500	7500	7500	7500	7500	7500
	Last Visible Frame	14999	14999	14999	14999	14999	14999	14999	14999
	Visibility Rate (%)	1	1	1	1	0.985067	1	0.989733	1
	Invisibility Rate (%)	0	0	0	0	0.0149333	0	0.0102667	0
	Explored Areas	4	6	4	5	4	1	8	2
	Number of Areas	9	9	9	9	9	9	9	9
	Exploration Rate (%)	0.444444	0.666667	0.444444	0.555556	0.444444	0.111111	0.888889	0.222222
	Total Distance (mm)	2226.88	550.378	333.633	1232.23	2505.22	62.6114	8962.07	156.01
	Transitions In	0	0	0	0	0	0	0	0
	Transitions Out	0	0	0	0	0	0	0	0
	Frozen Events	13	8	8	12	7	2	1	6
	Tot. Time Frozen (m:s)	0:02:09.680000	0:04:19.600000	0:04:27.600000	0:03:07.520000	0:00:55.240000	0:04:58.560000	0:00:04.080000	0:04:47.640000
	Avg. Time Frozen (m:s)	0:00:09.975000	0:00:32.450000	0:00:33.450000	0:00:15.627000	0:00:07.891000	0:02:29.280000	0:00:04.080000	0:00:47.940000
	15.6 g/L	Replicat
		1	2	3	4	5	6	7	8
	Av. Speed (mm/s)	9.96858	2.1594	0.257339	10.2621	16.9189	31.5497	0.202594	5.47549
	Mob. Av. Speed (mm/s)	14.8622	6.8551	1.33668	15.0382	17.8578	33.8396	1.73884	12.1084
	Av. Accel (mm/s^2)	13.4486	5.0231	1.61667	15.2228	22.7914	43.8467	1.09977	11.6037
	Mobility Rate (%)	0.661267	0.30056	0.0504269	0.676754	0.946036	0.931053	0.0477588	0.442903
	Visible Frames	7473	7500	7500	7472	7472	7430	7500	7500
	Visible Time (m:s)	0:04:58.920000	0:05:00	0:05:00	0:04:58.880000	0:04:58.880000	0:04:57.200000	0:05:00	0:05:00
	Invisible Frames	27	0	0	28	28	70	0	0
	Invisible Time (m:s)	0:00:01.080000	0:00:00	0:00:00	0:00:01.120000	0:00:01.120000	0:00:02.800000	0:00:00	0:00:00
	First Visible Frame	7500	7500	7500	7500	7500	7500	7500	7500
	Last Visible Frame	14999	14999	14999	14999	14999	14999	14999	14999
	Visibility Rate (%)	0.9964	1	1	0.996267	0.996267	0.990667	1	1
	Invisibility Rate (%)	0.0036	0	0	0.00373333	0.00373333	0.00933333	0	0
	Explored Areas	4	7	1	8	7	8	1	6
	Number of Areas	9	9	9	9	9	9	9	9
	Exploration Rate (%)	0.444444	0.777778	0.111111	0.888889	0.777778	0.888889	0.111111	0.666667
	Total Distance (mm)	3034.66	686.556	108.498	3123.77	5097.31	9489.52	79.5251	1671.84
	Transitions In	0	0	0	0	0	0	0	0
	Transitions Out	0	0	0	0	0	0	0	0
	Frozen Events	3	9	1	11	2	3	2	15
	Tot. Time Frozen (m:s)	0:01:59.200000	0:03:57.040000	0:04:59.960000	0:01:52.360000	0:00:08.520000	0:00:14.880000	0:04:55.880000	0:02:59.640000
	Avg. Time Frozen (m:s)	0:00:39.733000	0:00:26.338000	0:04:59.960000	0:00:10.215000	0:00:04.260000	0:00:04.960000	0:02:27.940000	0:00:11.976000

## Sheet: Video_d3
	Procedural and solvent blank	Replicat
		1	2	3	4	5	6	7	8
	Av. Speed (mm/s)	31.1989	7.48194	1.67729	0.43489	1.03178	0.314329	17.6917	1.43121
	Mob. Av. Speed (mm/s)	33.2774	10.835	5.54727	1.41758	2.70799	2.21579	18.3377	5.28279
	Av. Accel (mm/s^2)	39.0437	10.1526	5.3585	2.32998	4.76024	1.28639	33.2393	4.0788
	Mobility Rate (%)	0.936207	0.679759	0.273613	0.102455	0.292956	0.0455543	0.963714	0.231457
	Visible Frames	7450	7464	7500	7500	7500	7292	7500	7500
	Visible Time (m:s)	0:04:58	0:04:58.560000	0:05:00	0:05:00	0:05:00	0:04:51.680000	0:05:00	0:05:00
	Invisible Frames	50	36	0	0	0	208	0	0
	Invisible Time (m:s)	0:00:02	0:00:01.440000	0:00:00	0:00:00	0:00:00	0:00:08.320000	0:00:00	0:00:00
	First Visible Frame	7500	7500	7500	7500	7500	7500	7500	7500
	Last Visible Frame	14999	14999	14999	14999	14999	14999	14999	14999
	Visibility Rate (%)	0.993333	0.9952	1	1	1	0.972267	1	1
	Invisibility Rate (%)	0.00666667	0.0048	0	0	0	0.0277333	0	0
	Explored Areas	6	4	4	1	2	3	7	4
	Number of Areas	9	9	9	9	9	9	9	9
	Exploration Rate (%)	0.666667	0.444444	0.444444	0.111111	0.222222	0.333333	0.777778	0.444444
	Total Distance (mm)	9389.36	2267.89	542.292	175.694	361.131	115.159	5338.04	457.705
	Transitions In	0	0	0	0	0	0	0	0
	Transitions Out	0	0	0	0	0	0	0	0
	Frozen Events	0	7	10	1	11	2	0	11
	Tot. Time Frozen (m:s)	0:00:00	0:01:46.920000	0:04:02.720000	0:04:59.960000	0:04:20.040000	0:04:51.560000	0:00:00	0:04:23.360000
	Avg. Time Frozen (m:s)	0:00:00	0:00:15.274000	0:00:24.272000	0:04:59.960000	0:00:23.640000	0:02:25.780000	0:00:00	0:00:23.942000
	NC	Replicat
		1	2	3	4	5	6	7	8
	Av. Speed (mm/s)	27.1378	4.30902	2.84347	3.50247	0.383105	23.0595	4.13868	0.183868
	Mob. Av. Speed (mm/s)	30.9952	9.13109	5.88777	6.65461	1.55308	24.088	9.11153	1.70458
	Av. Accel (mm/s^2)	31.8643	9.38939	6.98574	7.4996	2.24963	48.9109	14.7844	1.18479
	Mobility Rate (%)	0.8742	0.452924	0.459045	0.508138	0.17516	0.954545	0.434232	0.0322839
	Visible Frames	7500	7407	7500	7500	7500	7198	7500	7500
	Visible Time (m:s)	0:05:00	0:04:56.280000	0:05:00	0:05:00	0:05:00	0:04:47.920000	0:05:00	0:05:00
	Invisible Frames	0	93	0	0	0	302	0	0
	Invisible Time (m:s)	0:00:00	0:00:03.720000	0:00:00	0:00:00	0:00:00	0:00:12.080000	0:00:00	0:00:00
	First Visible Frame	7500	7500	7500	7500	7500	7500	7500	7500
	Last Visible Frame	14999	14999	14999	14999	14999	14999	14999	14999
	Visibility Rate (%)	1	0.9876	1	1	1	0.959733	1	1
	Invisibility Rate (%)	0	0.0124	0	0	0	0.0402667	0	0
	Explored Areas	6	6	5	4	1	7	4	1
	Number of Areas	9	9	9	9	9	9	9	9
	Exploration Rate (%)	0.666667	0.666667	0.555556	0.444444	0.111111	0.777778	0.444444	0.111111
	Total Distance (mm)	8178.08	1321.67	899.294	1082.41	149.596	6963.33	1297.24	72.3739
	Transitions In	0	0	0	0	0	0	0	0
	Transitions Out	0	0	0	0	0	0	0	0
	Frozen Events	7	9	13	8	1	0	23	3
	Tot. Time Frozen (m:s)	0:00:31.640000	0:03:15.320000	0:03:07.800000	0:02:50.840000	0:04:55.080000	0:00:00	0:03:30.240000	0:04:59.880000
	Avg. Time Frozen (m:s)	0:00:04.520000	0:00:21.702000	0:00:14.446000	0:00:21.355000	0:04:55.080000	0:00:00	0:00:09.141000	0:01:39.960000
	PC	Replicat
		1	2	3	4	5	6	7	8
	Av. Speed (mm/s)						25.277	21.8846
	Mob. Av. Speed (mm/s)						26.3486	26.2072
	Av. Accel (mm/s^2)						24.3739	27.1736
	Mobility Rate (%)						0.95844	0.831787
	Visible Frames						7439	7441
	Visible Time (m:s)						0:04:57.560000	0:04:57.640000
	Invisible Frames						61	59
	Invisible Time (m:s)						0:00:02.440000	0:00:02.360000
	First Visible Frame						7500	7500
	Last Visible Frame						14999	14999
	Visibility Rate (%)						0.991867	0.992133
	Invisibility Rate (%)						0.00813333	0.00786667
	Explored Areas						4	9
	Number of Areas						9	9
	Exploration Rate (%)						0.444444	1
	Total Distance (mm)						7605.61	6613.18
	Transitions In						0	0
	Transitions Out						0	0
	Frozen Events						2	3
	Tot. Time Frozen (m:s)						0:00:13.120000	0:00:46.520000
	Avg. Time Frozen (m:s)						0:00:06.560000	0:00:15.507000
	0.4 g/L	Replicat
		1	2	3	4	5	6	7	8
	Av. Speed (mm/s)	13.1443	13.5396	14.6897	3.87357	26.0475	10.0335	14.2526	50.3345
	Mob. Av. Speed (mm/s)	18.5253	17.9058	16.9621	7.39346	34.7581	18.7955	16.9354	52.122
	Av. Accel (mm/s^2)	13.837	25.425	30.9222	8.69341	35.8185	17.7804	23.7149	57.3767
	Mobility Rate (%)	0.701875	0.751601	0.86246	0.500133	0.742185	0.518629	0.838314	0.965085
	Visible Frames	7417	7500	7500	7500	7362	7358	7500	7422
	Visible Time (m:s)	0:04:56.680000	0:05:00	0:05:00	0:05:00	0:04:54.480000	0:04:54.320000	0:05:00	0:04:56.880000
	Invisible Frames	83	0	0	0	138	142	0	78
	Invisible Time (m:s)	0:00:03.320000	0:00:00	0:00:00	0:00:00	0:00:05.520000	0:00:05.680000	0:00:00	0:00:03.120000
	First Visible Frame	7500	7500	7500	7500	7500	7500	7500	7500
	Last Visible Frame	14999	14999	14999	14999	14999	14999	14999	14999
	Visibility Rate (%)	0.988933	1	1	1	0.9816	0.981067	1	0.9896
	Invisibility Rate (%)	0.0110667	0	0	0	0.0184	0.0189333	0	0.0104
	Explored Areas	4	4	7	6	4	5	6	7
	Number of Areas	9	9	9	9	9	9	9	9
	Exploration Rate (%)	0.444444	0.444444	0.777778	0.666667	0.444444	0.555556	0.666667	0.777778
	Total Distance (mm)	3969.61	4096.42	4439.96	1191.09	7877.35	3046.64	4305.3	15200.7
	Transitions In	0	0	0	0	0	0	0	0
	Transitions Out	0	0	0	0	0	0	0	0
	Frozen Events	10	7	3	15	16	10	4	2
	Tot. Time Frozen (m:s)	0:01:38.920000	0:01:05.640000	0:00:11.320000	0:02:45.160000	0:01:16.440000	0:02:23.160000	0:00:43.160000	0:00:08.840000
	Avg. Time Frozen (m:s)	0:00:09.892000	0:00:09.377000	0:00:03.773000	0:00:11.011000	0:00:04.778000	0:00:14.316000	0:00:10.790000	0:00:04.420000
	1 g/L	Replicat
		1	2	3	4	5	6	7	8
	Av. Speed (mm/s)	1.19312	16.0781	0.453059	31.682	15.319	0.223319	0.180925	0.452725
	Mob. Av. Speed (mm/s)	9.06979	25.8889	2.84104	35.1678	17.9183	1.71276	1.44277	1.95877
	Av. Accel (mm/s^2)	2.31356	21.5796	2.08611	45.18	30.7994	1.24509	1.12618	2.26671
	Mobility Rate (%)	0.10696	0.615395	0.106857	0.899518	0.846228	0.0572305	0.0809765	0.162353
	Visible Frames	7418	7474	7500	7468	7229	7500	7500	7500
	Visible Time (m:s)	0:04:56.720000	0:04:58.960000	0:05:00	0:04:58.720000	0:04:49.160000	0:05:00	0:05:00	0:05:00
	Invisible Frames	82	26	0	32	271	0	0	0
	Invisible Time (m:s)	0:00:03.280000	0:00:01.040000	0:00:00	0:00:01.280000	0:00:10.840000	0:00:00	0:00:00	0:00:00
	First Visible Frame	7500	7500	7500	7500	7500	7500	7500	7500
	Last Visible Frame	14999	14999	14999	14999	14999	14999	14999	14999
	Visibility Rate (%)	0.989067	0.996533	1	0.995733	0.963867	1	1	1
	Invisibility Rate (%)	0.0109333	0.00346667	0	0.00426667	0.0361333	0	0	0
	Explored Areas	4	6	2	6	4	1	1	2
	Number of Areas	9	9	9	9	9	9	9	9
	Exploration Rate (%)	0.444444	0.666667	0.222222	0.666667	0.444444	0.111111	0.111111	0.222222
	Total Distance (mm)	377.657	4866.88	156.965	9560.56	4638.11	86.8191	74.5809	168.24
	Transitions In	0	0	0	0	0	0	0	0
	Transitions Out	0	0	0	0	0	0	0	0
	Frozen Events	5	11	2	3	4	3	2	6
	Tot. Time Frozen (m:s)	0:04:34	0:01:57.600000	0:04:55.240000	0:00:23.840000	0:00:42.960000	0:04:59.880000	0:04:55.760000	0:04:50.560000
	Avg. Time Frozen (m:s)	0:00:54.800000	0:00:10.691000	0:02:27.620000	0:00:07.947000	0:00:10.740000	0:01:39.960000	0:02:27.880000	0:00:48.427000
	2.5 g/L	Replicat
		1	2	3	4	5	6	7	8
	Av. Speed (mm/s)	27.676	20.8821	10.4253	40.2272	7.95574	7.41243	30.4635	21.3991
	Mob. Av. Speed (mm/s)	31.7823	21.627	13.7088	43.4632	13.4642	20.1707	34.4517	24.4788
	Av. Accel (mm/s^2)	43.4572	32.9594	19.0048	50.8167	18.9688	11.9195	37.2859	36.7132
	Mobility Rate (%)	0.863426	0.963262	0.752935	0.923979	0.581243	0.345808	0.882028	0.870618
	Visible Frames	7143	7190	7500	7423	7500	7352	7421	7393
	Visible Time (m:s)	0:04:45.720000	0:04:47.600000	0:05:00	0:04:56.920000	0:05:00	0:04:54.080000	0:04:56.840000	0:04:55.720000
	Invisible Frames	357	310	0	77	0	148	79	107
	Invisible Time (m:s)	0:00:14.280000	0:00:12.400000	0:00:00	0:00:03.080000	0:00:00	0:00:05.920000	0:00:03.160000	0:00:04.280000
	First Visible Frame	7500	7500	7500	7500	7500	7500	7500	7500
	Last Visible Frame	14999	14999	14999	14999	14999	14999	14999	14999
	Visibility Rate (%)	0.9524	0.958667	1	0.989733	1	0.980267	0.989467	0.985733
	Invisibility Rate (%)	0.0476	0.0413333	0	0.0102667	0	0.0197333	0.0105333	0.0142667
	Explored Areas	6	4	7	8	4	4	7	7
	Number of Areas	9	9	9	9	9	9	9	9
	Exploration Rate (%)	0.666667	0.444444	0.777778	0.888889	0.444444	0.444444	0.777778	0.777778
	Total Distance (mm)	8343.84	6296.67	3176.76	12168.8	2414.32	2257.65	9197.2	6462.92
	Transitions In	0	0	0	0	0	0	0	0
	Transitions Out	0	0	0	0	0	0	0	0
	Frozen Events	4	2	10	2	12	6	4	6
	Tot. Time Frozen (m:s)	0:00:24.640000	0:00:07.040000	0:00:57.040000	0:00:07.920000	0:02:10.600000	0:03:23.640000	0:00:23.560000	0:00:34.080000
	Avg. Time Frozen (m:s)	0:00:06.160000	0:00:03.520000	0:00:05.704000	0:00:03.960000	0:00:10.883000	0:00:33.940000	0:00:05.890000	0:00:05.680000
	6.25 g/L	Replicat
		1	2	3	4	5	6	7	8
	Av. Speed (mm/s)	3.55439	0.966722	1.66854	6.22667	20.1397	17.9091	26.6512	33.9651
	Mob. Av. Speed (mm/s)	8.03006	2.76806	4.10783	9.27363	24.2559	20.9129	29.4073	35.6101
	Av. Accel (mm/s^2)	10.4122	4.77884	5.4067	15.8854	33.164	29.1843	44.9584	50.949
	Mobility Rate (%)	0.41634	0.315635	0.365662	0.655416	0.823809	0.8523	0.904749	0.952671
	Visible Frames	7397	7500	7500	7500	7371	7438	7500	7399
	Visible Time (m:s)	0:04:55.880000	0:05:00	0:05:00	0:05:00	0:04:54.840000	0:04:57.520000	0:05:00	0:04:55.960000
	Invisible Frames	103	0	0	0	129	62	0	101
	Invisible Time (m:s)	0:00:04.120000	0:00:00	0:00:00	0:00:00	0:00:05.160000	0:00:02.480000	0:00:00	0:00:04.040000
	First Visible Frame	7500	7500	7500	7500	7500	7500	7500	7500
	Last Visible Frame	14999	14999	14999	14999	14999	14999	14999	14999
	Visibility Rate (%)	0.986267	1	1	1	0.9828	0.991733	1	0.986533
	Invisibility Rate (%)	0.0137333	0	0	0	0.0172	0.00826667	0	0.0134667
	Explored Areas	4	4	6	4	8	6	8	4
	Number of Areas	9	9	9	9	9	9	9	9
	Exploration Rate (%)	0.444444	0.444444	0.666667	0.444444	0.888889	0.666667	0.888889	0.444444
	Total Distance (mm)	1107.08	327.821	538.887	1913.64	6090.38	5397.57	8029.86	10245.9
	Transitions In	0	0	0	0	0	0	0	0
	Transitions Out	0	0	0	0	0	0	0	0
	Frozen Events	11	13	14	13	7	5	3	1
	Tot. Time Frozen (m:s)	0:03:14	0:04:26.400000	0:03:56.360000	0:01:42.040000	0:00:58.480000	0:00:29.920000	0:00:13.320000	0:00:03.040000
	Avg. Time Frozen (m:s)	0:00:17.636000	0:00:20.492000	0:00:16.883000	0:00:07.849000	0:00:08.354000	0:00:05.984000	0:00:04.440000	0:00:03.040000
	15.6 g/L	Replicat
		1	2	3	4	5	6	7	8
	Av. Speed (mm/s)	1.1177	0.984972	4.2192	16.0758	27.6627	15.3597	0.787118	0.284509
	Mob. Av. Speed (mm/s)	3.83518	3.47813	9.9516	19.3123	30.5408	20.7555	5.00758	2.02092
	Av. Accel (mm/s^2)	5.70396	2.80753	10.0652	22.0924	41.1254	19.8107	2.45885	1.70294
	Mobility Rate (%)	0.247199	0.237727	0.410752	0.823066	0.899734	0.72795	0.108725	0.115128
	Visible Frames	7500	7500	7500	7244	7145	7249	7500	7500
	Visible Time (m:s)	0:05:00	0:05:00	0:05:00	0:04:49.760000	0:04:45.800000	0:04:49.960000	0:05:00	0:05:00
	Invisible Frames	0	0	0	256	355	251	0	0
	Invisible Time (m:s)	0:00:00	0:00:00	0:00:00	0:00:10.240000	0:00:14.200000	0:00:10.040000	0:00:00	0:00:00
	First Visible Frame	7500	7500	7500	7500	7500	7500	7500	7500
	Last Visible Frame	14999	14999	14999	14999	14999	14999	14999	14999
	Visibility Rate (%)	1	1	1	0.965867	0.952667	0.966533	1	1
	Invisibility Rate (%)	0	0	0	0.0341333	0.0473333	0.0334667	0	0
	Explored Areas	3	4	4	6	4	6	3	2
	Number of Areas	9	9	9	9	9	9	9	9
	Exploration Rate (%)	0.333333	0.444444	0.444444	0.666667	0.444444	0.666667	0.333333	0.222222
	Total Distance (mm)	394.652	320.028	1295.57	4855.33	8340.69	4630.02	273.273	103.023
	Transitions In	0	0	0	0	0	0	0	0
	Transitions Out	0	0	0	0	0	0	0	0
	Frozen Events	8	8	13	8	4	8	3	4
	Tot. Time Frozen (m:s)	0:04:18.280000	0:04:10.920000	0:03:20.840000	0:00:55.440000	0:00:17.800000	0:01:17.840000	0:04:48.680000	0:04:54.360000
	Avg. Time Frozen (m:s)	0:00:32.285000	0:00:31.365000	0:00:15.449000	0:00:06.930000	0:00:04.450000	0:00:09.730000	0:01:36.227000	0:01:13.590000

## Sheet: Video_d7
	Procedural and solvent blank	Replicat
		1	2	3	4	5	6	7	8
	Av. Speed (mm/s)	18.295	0.123523	5.86225	0.673883	8.53541	0.878964	21.3913	0.799461
	Mob. Av. Speed (mm/s)	24.8083	1.03306	10.2246	3.46998	11.3062	3.04779	23.1391	2.67561
	Av. Accel (mm/s^2)	34.7778	0.752248	12.5491	2.32699	12.4843	3.13075	29.437	3.17703
	Mobility Rate (%)	0.7312	0.000667022	0.560699	0.164888	0.747332	0.217316	0.91966	0.225187
	Visible Frames	7411	7500	7500	7500	7500	7500	7186	7500
	Visible Time (m:s)	0:04:56.440000	0:05:00	0:05:00	0:05:00	0:05:00	0:05:00	0:04:47.440000	0:05:00
	Invisible Frames	89	0	0	0	0	0	314	0
	Invisible Time (m:s)	0:00:03.560000	0:00:00	0:00:00	0:00:00	0:00:00	0:00:00	0:00:12.560000	0:00:00
	First Visible Frame	7500	7500	7500	7500	7500	7500	7500	7500
	Last Visible Frame	14999	14999	14999	14999	14999	14999	14999	14999
	Visibility Rate (%)	0.988133	1	1	1	1	1	0.958133	1
	Invisibility Rate (%)	0.0118667	0	0	0	0	0	0.0418667	0
	Explored Areas	4	1	4	1	4	3	7	3
	Number of Areas	9	9	9	9	9	9	9	9
	Exploration Rate (%)	0.444444	0.111111	0.444444	0.111111	0.444444	0.333333	0.777778	0.333333
	Total Distance (mm)	5529.45	51.7286	1789.47	225.136	2580.55	295.245	6440.49	277.296
	Transitions In	0	0	0	0	0	0	0	0
	Transitions Out	0	0	0	0	0	0	0	0
	Frozen Events	7	1	11	7	7	11	3	7
	Tot. Time Frozen (m:s)	0:01:09.040000	0:04:59.960000	0:02:14.600000	0:04:33.480000	0:01:01.400000	0:04:18.280000	0:00:11.960000	0:04:26.120000
	Avg. Time Frozen (m:s)	0:00:09.863000	0:04:59.960000	0:00:12.236000	0:00:39.069000	0:00:08.771000	0:00:23.480000	0:00:03.987000	0:00:38.017000
	NC	Replicat
		1	2	3	4	5	6	7	8
	Av. Speed (mm/s)	1.87227	0.248478	8.03215	5.11529	44.4372	4.74268	19.3247	3.83414
	Mob. Av. Speed (mm/s)	6.16881	2.20529	11.3335	8.09892	44.7145	7.99368	30.9418	9.61252
	Av. Accel (mm/s^2)	4.82568	1.29653	13.7625	9.51002	55.9835	11.8893	36.7448	9.05996
	Mobility Rate (%)	0.289888	0.060032	0.701307	0.609862	0.993706	0.57564	0.620464	0.382836
	Visible Frames	7500	7500	7500	7386	7472	7500	7500	7438
	Visible Time (m:s)	0:05:00	0:05:00	0:05:00	0:04:55.440000	0:04:58.880000	0:05:00	0:05:00	0:04:57.520000
	Invisible Frames	0	0	0	114	28	0	0	62
	Invisible Time (m:s)	0:00:00	0:00:00	0:00:00	0:00:04.560000	0:00:01.120000	0:00:00	0:00:00	0:00:02.480000
	First Visible Frame	7500	7500	7500	7500	7500	7500	7500	7500
	Last Visible Frame	14999	14999	14999	14999	14999	14999	14999	14999
	Visibility Rate (%)	1	1	1	0.9848	0.996267	1	1	0.991733
	Invisibility Rate (%)	0	0	0	0.0152	0.00373333	0	0	0.00826667
	Explored Areas	5	2	4	4	4	4	6	4
	Number of Areas	9	9	9	9	9	9	9	9
	Exploration Rate (%)	0.555556	0.222222	0.444444	0.444444	0.444444	0.444444	0.666667	0.444444
	Total Distance (mm)	592.11	91.2447	2445	1559.85	13396.3	1453.26	5846.8	1173.43
	Transitions In	0	0	0	0	0	0	0	0
	Transitions Out	0	0	0	0	0	0	0	0
	Frozen Events	7	3	12	10	0	15	9	7
	Tot. Time Frozen (m:s)	0:03:54.240000	0:04:56.080000	0:01:38.560000	0:02:06.720000	0:00:00	0:01:53.400000	0:01:52.360000	0:02:43.720000
	Avg. Time Frozen (m:s)	0:00:33.463000	0:01:38.693000	0:00:08.213000	0:00:12.672000	0:00:00	0:00:07.560000	0:00:12.484000	0:00:23.389000
	PC	Replicat
		1	2	3	4	5	6	7	8
	Av. Speed (mm/s)
	Mob. Av. Speed (mm/s)
	Av. Accel (mm/s^2)
	Mobility Rate (%)
	Visible Frames
	Visible Time (m:s)
	Invisible Frames
	Invisible Time (m:s)
	First Visible Frame
	Last Visible Frame
	Visibility Rate (%)
	Invisibility Rate (%)
	Explored Areas
	Number of Areas
	Exploration Rate (%)
	Total Distance (mm)
	Transitions In
	Transitions Out
	Frozen Events
	Tot. Time Frozen (m:s)
	Avg. Time Frozen (m:s)
	0.4 g/L	Replicat
		1	2	3	4	5	6	7	8
	Av. Speed (mm/s)	1.52699	26.7581	21.796	6.62433	4.87301	20.4373	10.9936	28.7954
	Mob. Av. Speed (mm/s)	4.32998	27.5073	22.7211	12.758	7.6402	26.7569	12.9303	30.0418
	Av. Accel (mm/s^2)	3.24841	43.2765	37.7637	13.8221	13.4861	35.5763	24.1918	29.0991
	Mobility Rate (%)	0.327641	0.972152	0.958183	0.505736	0.623533	0.761473	0.844152	0.956042
	Visible Frames	7500	7473	7465	7500	7500	7500	7460	7170
	Visible Time (m:s)	0:05:00	0:04:58.920000	0:04:58.600000	0:05:00	0:05:00	0:05:00	0:04:58.400000	0:04:46.800000
	Invisible Frames	0	27	35	0	0	0	40	330
	Invisible Time (m:s)	0:00:00	0:00:01.080000	0:00:01.400000	0:00:00	0:00:00	0:00:00	0:00:01.600000	0:00:13.200000
	First Visible Frame	7500	7500	7500	7500	7500	7500	7500	7500
	Last Visible Frame	14999	14999	14999	14999	14999	14999	14999	14999
	Visibility Rate (%)	1	0.9964	0.995333	1	1	1	0.994667	0.956
	Invisibility Rate (%)	0	0.0036	0.00466667	0	0	0	0.00533333	0.044
	Explored Areas	4	4	6	4	4	6	6	7
	Number of Areas	9	9	9	9	9	9	9	9
	Exploration Rate (%)	0.444444	0.444444	0.666667	0.444444	0.444444	0.666667	0.666667	0.777778
	Total Distance (mm)	473.433	8057.4	6573.05	2027.62	1499.92	6161.29	3332.93	8736.38
	Transitions In	0	0	0	0	0	0	0	0
	Transitions Out	0	0	0	0	0	0	0	0
	Frozen Events	7	0	0	8	20	12	7	1
	Tot. Time Frozen (m:s)	0:03:29.240000	0:00:00	0:00:00	0:02:40.640000	0:02:06.120000	0:01:13.440000	0:00:34.240000	0:00:03.560000
	Avg. Time Frozen (m:s)	0:00:29.891000	0:00:00	0:00:00	0:00:20.080000	0:00:06.306000	0:00:06.120000	0:00:04.891000	0:00:03.560000
	1 g/L	Replicat
		1	2	3	4	5	6	7	8
	Av. Speed (mm/s)	6.25988	21.6499	1.74215	0.444601	23.3787	3.09483	0.694218	2.01875
	Mob. Av. Speed (mm/s)	12.0191	27.6749	5.1075	4.23805	27.4284	6.79037	7.07047	5.73862
	Av. Accel (mm/s^2)	9.32574	33.8129	3.81927	1.66078	45.34	5.73851	1.78052	5.79083
	Mobility Rate (%)	0.50844	0.774895	0.30563	0.0565635	0.848139	0.420121	0.076841	0.328308
	Visible Frames	7468	7365	7500	7500	7366	7290	7500	7500
	Visible Time (m:s)	0:04:58.720000	0:04:54.600000	0:05:00	0:05:00	0:04:54.640000	0:04:51.600000	0:05:00	0:05:00
	Invisible Frames	32	135	0	0	134	210	0	0
	Invisible Time (m:s)	0:00:01.280000	0:00:05.400000	0:00:00	0:00:00	0:00:05.360000	0:00:08.400000	0:00:00	0:00:00
	First Visible Frame	7500	7500	7500	7500	7500	7500	7500	7500
	Last Visible Frame	14999	14999	14999	14999	14999	14999	14999	14999
	Visibility Rate (%)	0.995733	0.982	1	1	0.982133	0.972	1	1
	Invisibility Rate (%)	0.00426667	0.018	0	0	0.0178667	0.028	0	0
	Explored Areas	8	6	6	2	4	4	3	4
	Number of Areas	9	9	9	9	9	9	9	9
	Exploration Rate (%)	0.888889	0.666667	0.666667	0.222222	0.444444	0.444444	0.333333	0.444444
	Total Distance (mm)	1897.09	6537.25	546.026	159.748	7049.12	950.683	232.505	638.586
	Transitions In	0	0	0	0	0	0	0	0
	Transitions Out	0	0	0	0	0	0	0	0
	Frozen Events	11	9	10	2	2	11	4	14
	Tot. Time Frozen (m:s)	0:02:44.760000	0:00:55.040000	0:03:49.200000	0:04:54.680000	0:00:44.400000	0:02:55.200000	0:04:43.080000	0:03:49
	Avg. Time Frozen (m:s)	0:00:14.978000	0:00:06.116000	0:00:22.920000	0:02:27.340000	0:00:22.200000	0:00:15.927000	0:01:10.770000	0:00:16.357000
	2.5 g/L	Replicat
		1	2	3	4	5	6	7	8
	Av. Speed (mm/s)	11.2686	17.5354	10.2177	4.7594	78.0581	0.243222	41.7173	12.5972
	Mob. Av. Speed (mm/s)	18.5106	18.3035	12.7559	8.95748	79.2414	1.58705	42.9647	15.8671
	Av. Accel (mm/s^2)	23.5826	29.6508	22.0799	10.0351	107.469	1.62862	46.4455	23.8736
	Mobility Rate (%)	0.602223	0.956777	0.793623	0.516738	0.984785	0.0779082	0.970651	0.789888
	Visible Frames	7473	7500	7500	7472	7365	7500	7500	7500
	Visible Time (m:s)	0:04:58.920000	0:05:00	0:05:00	0:04:58.880000	0:04:54.600000	0:05:00	0:05:00	0:05:00
	Invisible Frames	27	0	0	28	135	0	0	0
	Invisible Time (m:s)	0:00:01.080000	0:00:00	0:00:00	0:00:01.120000	0:00:05.400000	0:00:00	0:00:00	0:00:00
	First Visible Frame	7500	7500	7500	7500	7500	7500	7500	7500
	Last Visible Frame	14999	14999	14999	14999	14999	14999	14999	14999
	Visibility Rate (%)	0.9964	1	1	0.996267	0.982	1	1	1
	Invisibility Rate (%)	0.0036	0	0	0.00373333	0.018	0	0	0
	Explored Areas	4	4	7	4	8	1	6	6
	Number of Areas	9	9	9	9	9	9	9	9
	Exploration Rate (%)	0.444444	0.444444	0.777778	0.444444	0.888889	0.111111	0.666667	0.666667
	Total Distance (mm)	3409.86	5290.1	3147.37	1460.89	23653.5	94.0085	12567.1	3803.63
	Transitions In	0	0	0	0	0	0	0	0
	Transitions Out	0	0	0	0	0	0	0	0
	Frozen Events	11	1	6	13	1	3	0	4
	Tot. Time Frozen (m:s)	0:01:54.160000	0:00:04.240000	0:00:31.400000	0:02:42.680000	0:00:04.360000	0:04:59.880000	0:00:00	0:00:48.800000
	Avg. Time Frozen (m:s)	0:00:10.378000	0:00:04.240000	0:00:05.233000	0:00:12.514000	0:00:04.360000	0:01:39.960000	0:00:00	0:00:12.200000
	6.25 g/L	Replicat
		1	2	3	4	5	6	7	8
	Av. Speed (mm/s)	21.4944	34.142	4.32081	29.0516	29.07	1.31481	15.5363	19.9219
	Mob. Av. Speed (mm/s)	25.6517	35.332	8.96748	32.1796	31.48	7.79713	18.9101	24.7688
	Av. Accel (mm/s^2)	31.364	77.1841	9.3964	48.0352	40.14	3.58636	31.7431	34.6357
	Mobility Rate (%)	0.835646	0.965848	0.465448	0.898672	0.9212	0.151414	0.817597	0.801761
	Visible Frames	7500	7500	7500	7307	7361	7500	7471	7500
	Visible Time (m:s)	0:05:00	0:05:00	0:05:00	0:04:52.280000	00:04:54.400000	0:05:00	0:04:58.840000	0:05:00
	Invisible Frames	0	0	0	193	139	0	29	0
	Invisible Time (m:s)	0:00:00	0:00:00	0:00:00	0:00:07.720000	00:00:05.600000	0:00:00	0:00:01.160000	0:00:00
	First Visible Frame	7500	7500	7500	7500	7500	7500	7500	7500
	Last Visible Frame	14999	14999	14999	14999	14999	14999	14999	14999
	Visibility Rate (%)	1	1	1	0.974267	0.9815	1	0.996133	1
	Invisibility Rate (%)	0	0	0	0.0257333	0.0185	0	0.00386667	0
	Explored Areas	6	7	7	4	4	4	6	7
	Number of Areas	9	9	9	9	9	9	9	9
	Exploration Rate (%)	0.666667	0.777778	0.777778	0.444444	0.4444	0.444444	0.666667	0.777778
	Total Distance (mm)	6475.25	10287.5	1318.52	8784.41	8765.3	416.518	4693.85	6022.7
	Transitions In	0	0	0	0	0	0	0	0
	Transitions Out	0	0	0	0	0	0	0	0
	Frozen Events	6	0	12	5	3	7	10	4
	Tot. Time Frozen (m:s)	0:00:34.920000	0:00:00	0:02:47.720000	0:00:21.880000	00:00:17.900000	0:04:35.320000	0:00:54.840000	0:00:51
	Avg. Time Frozen (m:s)	0:00:05.820000	0:00:00	0:00:13.977000	0:00:04.376000	00:00:06	0:00:39.331000	0:00:05.484000	0:00:12.750000
	15.6 g/L	Replicat
		1	2	3	4	5	6	7	8
	Av. Speed (mm/s)	5.17	2.18814	0.216981	14.0187	20.3716	1.33165	0.228131	4.23404
	Mob. Av. Speed (mm/s)	6.55	4.40998	1.33366	17.6393	23.2255	6.38017	2.02261	6.8065
	Av. Accel (mm/s^2)	10.52	6.514	1.47735	26.881	40.7043	4.10419	1.12817	11.08
	Mobility Rate (%)	0.7744	0.465315	0.030016	0.789253	0.874059	0.183431	0.0406884	0.599653
	Visible Frames	7472	7500	7500	7411	7444	7500	7500	7500
	Visible Time (m:s)	00:04:58.900000	0:05:00	0:05:00	0:04:56.440000	0:04:57.760000	0:05:00	0:05:00	0:05:00
	Invisible Frames	28	0	0	89	56	0	0	0
	Invisible Time (m:s)	00:00:01.100000	0:00:00	0:00:00	0:00:03.560000	0:00:02.240000	0:00:00	0:00:00	0:00:00
	First Visible Frame	7500	7500	7500	7500	7500	7500	7500	7500
	Last Visible Frame	14999	14999	14999	14999	14999	14999	14999	14999
	Visibility Rate (%)	0.9963	1	1	0.988133	0.992533	1	1	1
	Invisibility Rate (%)	0.0037	0	0	0.0118667	0.00746667	0	0	0
	Explored Areas	4	5	1	7	6	3	2	4
	Number of Areas	9	9	9	9	9	9	9	9
	Exploration Rate (%)	0.4444	0.555556	0.111111	0.777778	0.666667	0.333333	0.222222	0.444444
	Total Distance (mm)	1580.8	708.236	88.5333	4235.89	6141.97	421.086	98.6227	1310.52
	Transitions In	0	0	0	0	0	0	0	0
	Transitions Out	0	0	0	0	0	0	0	0
	Frozen Events	8	11	1	3	7	5	4	13
	Tot. Time Frozen (m:s)	00:01:13.100000	0:03:22.440000	0:04:59.960000	0:00:49.400000	0:00:26.400000	0:04:17.960000	0:04:55.120000	0:02:04.440000
	Avg. Time Frozen (m:s)	00:00:09.100000	0:00:18.404000	0:04:59.960000	0:00:16.467000	0:00:03.771000	0:00:51.592000	0:01:13.780000	0:00:09.572000

## Sheet: Video_d14
	Procedural and solvent blank	Replicat
		1	2	3	4	5	6	7	8
	Av. Speed (mm/s)	12.4972	1.34178	3.76996	3.35893	9.46866	1.50344	4.18305	4.32177
	Mob. Av. Speed (mm/s)	17.4123	3.55529	7.28032	5.59	10.7432	5.031	6.75048	10.0451
	Av. Accel (mm/s^2)	17.9298	4.09206	7.18588	7.52243	14.1656	4.61792	8.72032	8.67591
	Mobility Rate (%)	0.710912	0.314968	0.496665	0.577375	0.874268	0.261473	0.604589	0.415422
	Visible Frames	7500	7500	7500	7500	7345	7500	7500	7500
	Visible Time (m:s)	0:05:00	0:05:00	0:05:00	0:05:00	0:04:53.800000	0:05:00	0:05:00	0:05:00
	Invisible Frames	0	0	0	0	155	0	0	0
	Invisible Time (m:s)	0:00:00	0:00:00	0:00:00	0:00:00	0:00:06.200000	0:00:00	0:00:00	0:00:00
	First Visible Frame	7500	7500	7500	7500	7500	7500	7500	7500
	Last Visible Frame	14999	14999	14999	14999	14999	14999	14999	14999
	Visibility Rate (%)	1	1	1	1	0.979333	1	1	1
	Invisibility Rate (%)	0	0	0	0	0.0206667	0	0	0
	Explored Areas	4	6	4	4	6	5	7	7
	Number of Areas	9	9	9	9	9	9	9	9
	Exploration Rate (%)	0.444444	0.666667	0.444444	0.444444	0.666667	0.555556	0.777778	0.777778
	Total Distance (mm)	3810.32	441.629	1165.31	1038.54	2858.96	486.929	1278.12	1322.63
	Transitions In	0	0	0	0	0	0	0	0
	Transitions Out	0	0	0	0	0	0	0	0
	Frozen Events	8	10	9	24	5	7	9	10
	Tot. Time Frozen (m:s)	0:01:28.800000	0:04:12.480000	0:02:49.640000	0:02:35.040000	0:00:24.560000	0:03:55.440000	0:02:02.360000	0:02:56.960000
	Avg. Time Frozen (m:s)	0:00:11.100000	0:00:25.248000	0:00:18.849000	0:00:06.460000	0:00:04.912000	0:00:33.634000	0:00:13.596000	0:00:17.696000
	NC	Replicat
		1	2	3	4	5	6	7	8
	Av. Speed (mm/s)	19.7824	16.4258	5.08862	5.38656	30.0417	22.6263	3.40301	23.6725
	Mob. Av. Speed (mm/s)	27.5408	18.4641	7.22885	8.21524	32.3823	25.189	8.91201	25.4654
	Av. Accel (mm/s^2)	27.3184	24.1076	9.70215	11.8804	44.113	46.8465	11.5812	39.9666
	Mobility Rate (%)	0.715448	0.886686	0.681157	0.640342	0.926175	0.896076	0.366462	0.925011
	Visible Frames	7500	7470	7434	7500	7427	7471	7500	7165
	Visible Time (m:s)	0:05:00	0:04:58.800000	0:04:57.360000	0:05:00	0:04:57.080000	0:04:58.840000	0:05:00	0:04:46.600000
	Invisible Frames	0	30	66	0	73	29	0	335
	Invisible Time (m:s)	0:00:00	0:00:01.200000	0:00:02.640000	0:00:00	0:00:02.920000	0:00:01.160000	0:00:00	0:00:13.400000
	First Visible Frame	7500	7500	7500	7500	7500	7500	7500	7500
	Last Visible Frame	14999	14999	14999	14999	14999	14999	14999	14999
	Visibility Rate (%)	1	0.996	0.9912	1	0.990267	0.996133	1	0.955333
	Invisibility Rate (%)	0	0.004	0.0088	0	0.00973333	0.00386667	0	0.0446667
	Explored Areas	6	7	6	4	7	6	6	4
	Number of Areas	9	9	9	9	9	9	9	9
	Exploration Rate (%)	0.666667	0.777778	0.666667	0.444444	0.777778	0.666667	0.666667	0.444444
	Total Distance (mm)	5975.02	4958.13	1574.69	1652.85	9075.24	6842.92	1071.54	7147.79
	Transitions In	0	0	0	0	0	0	0	0
	Transitions Out	0	0	0	0	0	0	0	0
	Frozen Events	10	6	14	12	2	2	10	1
	Tot. Time Frozen (m:s)	0:01:24.960000	0:00:29.120000	0:01:27.360000	0:01:46.560000	0:00:09.320000	0:00:12.880000	0:03:03.240000	0:00:03.800000
	Avg. Time Frozen (m:s)	0:00:08.496000	0:00:04.853000	0:00:06.240000	0:00:08.880000	0:00:04.660000	0:00:06.440000	0:00:18.324000	0:00:03.800000
	PC	Replicat
		1	2	3	0.04	5	6	7	8
	Av. Speed (mm/s)
	Mob. Av. Speed (mm/s)
	Av. Accel (mm/s^2)
	Mobility Rate (%)
	Visible Frames
	Visible Time (m:s)
	Invisible Frames
	Invisible Time (m:s)
	First Visible Frame
	Last Visible Frame
	Visibility Rate (%)
	Invisibility Rate (%)
	Explored Areas
	Number of Areas
	Exploration Rate (%)
	Total Distance (mm)
	Transitions In
	Transitions Out
	Frozen Events
	Tot. Time Frozen (m:s)
	Avg. Time Frozen (m:s)
	0.4 g/L	Replicat
		1	2	3	4	5	6	7	8
	Av. Speed (mm/s)	2.66179	43.8456	18.9842	1.18044	5.12106	12.9688	7.09606	18.0491
	Mob. Av. Speed (mm/s)	4.38724	44.4319	21.8958	5.0022	8.02212	30.5047	11.5747	19.7345
	Av. Accel (mm/s^2)	6.03333	63.7462	33.5258	3.40841	11.9065	15.3478	12.6673	22.4033
	Mobility Rate (%)	0.582711	0.98666	0.855867	0.204509	0.606707	0.421291	0.597597	0.912974
	Visible Frames	7500	7500	7060	7500	7220	7500	7412	7473
	Visible Time (m:s)	0:05:00	0:05:00	0:04:42.400000	0:05:00	0:04:48.800000	0:05:00	0:04:56.480000	0:04:58.920000
	Invisible Frames	0	0	440	0	280	0	88	27
	Invisible Time (m:s)	0:00:00	0:00:00	0:00:17.600000	0:00:00	0:00:11.200000	0:00:00	0:00:03.520000	0:00:01.080000
	First Visible Frame	7500	7500	7500	7500	7500	7500	7500	7500
	Last Visible Frame	14999	14999	14999	14999	14999	14999	14999	14999
	Visibility Rate (%)	1	1	0.941333	1	0.962667	1	0.988267	0.9964
	Invisibility Rate (%)	0	0	0.0586667	0	0.0373333	0	0.0117333	0.0036
	Explored Areas	4	7	7	3	6	6	6	8
	Number of Areas	9	9	9	9	9	9	9	9
	Exploration Rate (%)	0.444444	0.777778	0.777778	0.333333	0.666667	0.666667	0.666667	0.888889
	Total Distance (mm)	829.418	13200.1	5735.4	377.524	1566.38	3929.07	2166.71	5437.43
	Transitions In	0	0	0	0	0	0	0	0
	Transitions Out	0	0	0	0	0	0	0	0
	Frozen Events	16	0	5	8	19	8	7	2
	Tot. Time Frozen (m:s)	0:02:37.200000	0:00:00	0:00:34.440000	0:04:15.760000	0:02:00.640000	0:03:00.400000	0:02:13.120000	0:00:21.960000
	Avg. Time Frozen (m:s)	0:00:09.825000	0:00:00	0:00:06.888000	0:00:31.970000	0:00:06.349000	0:00:22.550000	0:00:19.017000	0:00:10.980000
	1 g/L	Replicat
		1	2	3	4	5	6	7	8
	Av. Speed (mm/s)	3.28338	0.208625	0.744152	8.70073	tot	0.391634	2.40012	1.16856
	Mob. Av. Speed (mm/s)	7.38738	2.06324	3.53331	18.3061		1.80532	5.77335	10.3218
	Av. Accel (mm/s^2)	5.27772	1.27516	2.53396	13.3774		2.0383	5.11927	2.8352
	Mobility Rate (%)	0.411797	0.0277481	0.165688	0.461528		0.104189	0.389541	0.101521
	Visible Frames	7396	7500	7500	7399		7500	7500	7500
	Visible Time (m:s)	0:04:55.840000	0:05:00	0:05:00	0:04:55.960000		0:05:00	0:05:00	0:05:00
	Invisible Frames	104	0	0	101		0	0	0
	Invisible Time (m:s)	0:00:04.160000	0:00:00	0:00:00	0:00:04.040000		0:00:00	0:00:00	0:00:00
	First Visible Frame	7500	7500	7500	7500		7500	7500	7500
	Last Visible Frame	14999	14999	14999	14999		14999	14999	14999
	Visibility Rate (%)	0.986133	1	1	0.986533		1	1	1
	Invisibility Rate (%)	0.0138667	0	0	0.0134667		0	0	0
	Explored Areas	4	1	4	9		2	4	4
	Number of Areas	9	9	9	16		9	9	9
	Exploration Rate (%)	0.444444	0.111111	0.444444	0.5625		0.222222	0.444444	0.444444
	Total Distance (mm)	1013.73	83.4674	242.778	2652.63		143.197	752.16	370.927
	Transitions In	0	0	0	0		0	0	0
	Transitions Out	0	0	0	0		0	0	0
	Frozen Events	12	3	9	7		5	11	3
	Tot. Time Frozen (m:s)	0:03:25.280000	0:04:57.720000	0:04:39.160000	0:02:57.480000		0:04:59.800000	0:03:31.400000	0:04:39.840000
	Avg. Time Frozen (m:s)	0:00:17.107000	0:01:39.240000	0:00:31.018000	0:00:25.354000		0:00:59.960000	0:00:19.218000	0:01:33.280000
	2.5 g/L	Replicat
		1	2	3	4	5	6	7	8
	Av. Speed (mm/s)	31.4921	42.6782	10.0503	13.7269	53.0603	20.2404	4.93664	0.528168
	Mob. Av. Speed (mm/s)	32.9348	43.4812	12.3189	16.2583	54.5644	24.7047	6.38322	4.18931
	Av. Accel (mm/s^2)	43.1114	45.4495	21.1361	23.6746	69.44	34.0488	10.8129	2.28436
	Mobility Rate (%)	0.95571	0.981323	0.808565	0.840611	0.972252	0.816169	0.758039	0.0903148
	Visible Frames	7500	7500	7500	7470	7500	7500	7468	7500
	Visible Time (m:s)	0:05:00	0:05:00	0:05:00	0:04:58.800000	0:05:00	0:05:00	0:04:58.720000	0:05:00
	Invisible Frames	0	0	0	30	0	0	32	0
	Invisible Time (m:s)	0:00:00	0:00:00	0:00:00	0:00:01.200000	0:00:00	0:00:00	0:00:01.280000	0:00:00
	First Visible Frame	7500	7500	7500	7500	7500	7500	7500	7500
	Last Visible Frame	14999	14999	14999	14999	14999	14999	14999	14999
	Visibility Rate (%)	1	1	1	0.996	1	1	0.995733	1
	Invisibility Rate (%)	0	0	0	0.004	0	0	0.00426667	0
	Explored Areas	4	8	7	6	8	4	7	3
	Number of Areas	9	9	9	9	9	9	9	9
	Exploration Rate (%)	0.444444	0.888889	0.777778	0.666667	0.888889	0.444444	0.777778	0.333333
	Total Distance (mm)	9476.67	12840.8	3081.78	4142.29	16031.3	6101.83	1540.99	176.325
	Transitions In	0	0	0	0	0	0	0	0
	Transitions Out	0	0	0	0	0	0	0	0
	Frozen Events	1	0	3	4	1	6	10	1
	Tot. Time Frozen (m:s)	0:00:05.280000	0:00:00	0:00:24.240000	0:00:36.880000	0:00:07.600000	0:00:28.960000	0:01:16.160000	0:04:36.560000
	Avg. Time Frozen (m:s)	0:00:05.280000	0:00:00	0:00:08.080000	0:00:09.220000	0:00:07.600000	0:00:04.827000	0:00:07.616000	0:04:36.560000
	6.25 g/L	Replicat
		1	2	3	4	5	6	7	8
	Av. Speed (mm/s)	11.1095	35.6809	1.73571	not traceable	18.9331	0.2073	6.84897	26.7976
	Mob. Av. Speed (mm/s)	16.7744	37.3765	4.53786		20.2333	1.62228	10.4892	29.6351
	Av. Accel (mm/s^2)	15.1409	79.22	4.8165		36.83	1.40303	13.9581	50.1768
	Mobility Rate (%)	0.65248	0.954109	0.358191		0.932997	0.0381537	0.641275	0.902882
	Visible Frames	7382	7500	7500		7347	7500	7500	7500
	Visible Time (m:s)	0:04:55.280000	0:05:00	0:05:00		0:04:53.880000	0:05:00	0:05:00	0:05:00
	Invisible Frames	118	0	0		153	0	0	0
	Invisible Time (m:s)	0:00:04.720000	0:00:00	0:00:00		0:00:06.120000	0:00:00	0:00:00	0:00:00
	First Visible Frame	7500	7500	7500		7500	7500	7500	7500
	Last Visible Frame	14999	14999	14999		14999	14999	14999	14999
	Visibility Rate (%)	0.984267	1	1		0.9796	1	1	1
	Invisibility Rate (%)	0.0157333	0	0		0.0204	0	0	0
	Explored Areas	6	6	6		4	1	4	5
	Number of Areas	9	9	9		9	9	9	9
	Exploration Rate (%)	0.666667	0.666667	0.666667		0.444444	0.111111	0.444444	0.555556
	Total Distance (mm)	3359.52	10751.9	553.157		5709.71	81.8254	2095.89	8078.37
	Transitions In	0	0	0		0	0	0	0
	Transitions Out	0	0	0		0	0	0	0
	Frozen Events	11	2	13		2	2	10	3
	Tot. Time Frozen (m:s)	0:01:48.040000	0:00:06.880000	0:03:39.160000		0:00:07.960000	0:04:57.800000	0:02:03.480000	0:00:11.040000
	Avg. Time Frozen (m:s)	0:00:09.822000	0:00:03.440000	0:00:16.858000		0:00:03.980000	0:02:28.900000	0:00:12.348000	0:00:03.680000
	15.6 g/L	Replicat
		1	2	3	4	5	6	7	8
	Av. Speed (mm/s)	14.6517	2.71119	13.534	4.71481	0.0606041	4.5385	0.149638	1.72813
	Mob. Av. Speed (mm/s)	15.2947	6.04846	15.6496	7.0073	1.00934	8.51643	1.14478	5.00676
	Av. Accel (mm/s^2)	22.4364	6.6568	26.1877	8.93941	0.446253	8.83566	1.02248	5.34261
	Mobility Rate (%)	0.956158	0.430229	0.860324	0.658084	0.000133404	0.522012	0.0117396	0.305096
	Visible Frames	7417	7500	7414	7500	7500	7500	7500	7500
	Visible Time (m:s)	0:04:56.680000	0:05:00	0:04:56.560000	0:05:00	0:05:00	0:05:00	0:05:00	0:05:00
	Invisible Frames	83	0	86	0	0	0	0	0
	Invisible Time (m:s)	0:00:03.320000	0:00:00	0:00:03.440000	0:00:00	0:00:00	0:00:00	0:00:00	0:00:00
	First Visible Frame	7500	7500	7500	7500	7500	7500	7500	7500
	Last Visible Frame	14999	14999	14999	14999	14999	14999	14999	14999
	Visibility Rate (%)	0.988933	1	0.988533	1	1	1	1	1
	Invisibility Rate (%)	0.0110667	0	0.0114667	0	0	0	0	0
	Explored Areas	4	6	7	5	1	7	1	4
	Number of Areas	9	9	9	9	9	9	9	9
	Exploration Rate (%)	0.444444	0.666667	0.777778	0.555556	0.111111	0.777778	0.111111	0.444444
	Total Distance (mm)	4417.97	845.949	4076.88	1439.09	23.9545	1383	63.8999	553.887
	Transitions In	0	0	0	0	0	0	0	0
	Transitions Out	0	0	0	0	0	0	0	0
	Frozen Events	1	10	5	10	1	14	1	11
	Tot. Time Frozen (m:s)	0:00:03.800000	0:03:09.240000	0:00:36.960000	0:01:46.080000	0:04:59.960000	0:02:37.160000	0:04:59.960000	0:03:51.680000
	Avg. Time Frozen (m:s)	0:00:03.800000	0:00:18.924000	0:00:07.392000	0:00:10.608000	0:04:59.960000	0:00:11.226000	0:04:59.960000	0:00:21.062000
