# Supplementary material for: Locomotor behavior of Neocaridina palmata: a study with leachates from UV-weathered microplastics
Source: PeerJ. 2021 Nov 9;9:e12442. doi: 10.7717/peerj.12442 (PMC8588861; doi:10.7717/peerj.12442)
Supplement: Supplemental Information 4 — Raw measurements of water parameters, room temperature and humidity, mortality, molting and all analyzed video parameters of the freshwater shrimps on days 1, 3, 7, and 14 in the test with SB foil without UV-A/B irradiation. [file peerj-09-12442-s004.xlsx]

## Sheet: timetable
	day	-1	0	1	2	3	4	5	6	7	8	9	10	11	12	13	14
	datum	2019-12-03	2019-12-04	2019-12-05	2019-12-06	2019-12-07	2019-12-08	2019-12-09	2019-12-10	2019-12-11	2019-12-12	2019-12-13	2019-12-14	2019-12-15	2019-12-16	2019-12-17	2019-12-18
	to do	Preparations	start of test														end of test
			Feeding
				mortality/ecdysis control
				video		video				video							video
							water exchange				water exchange				water exchange
			Water parameters														Water parameters
											Ammonium						Ammonium

## Sheet: water parameter
		pH	conductivity	oxygen		temperature	CaCO3			ammonium
			[µS/cm]	[mg/L]	[%]	[°C]	[°d]	[mmol/L]	[mg/L]	[mg/L]
Test start	medium	7.54	515	8.66	100.6	22.4	4.4	1.6	97.632	0
day 8	NC	7.61	591	8.14	98.6	23.3	5.6	2	122.04	2
	PC
	SC	7.6	583	8.15	98.1	23	5.4	2	122.04	2
	0.4 g/L	7.65	603	8.11	97.5	22.9	5	1.95	118.989	2
	1 g/L	7.61	575	8.15	97.9	22.9	5	1.8	109.836	2
	2.5 g/L	7.7	594	8.21	98.6	22.9	5.6	1.8	109.836	1.6
	6.25 g/L	7.69	578	8.17	98.2	22.9	5.6	2	122.04	2
	15.6 g/L	7.7	563	8.12	98.1	23.2	5	1.8	109.836	2
end of test	NC	7.57	505	8.41	100.5	23.5	4.8	1.7	103.734	0.25
	SC	7.57	497	8.38	100	23.4	4.3	1.5	91.53	0.05
	0.4 g/L	7.63	509	8.26	98.6	23.4	5	1.8	109.836	0.25
	1 g/L	7.49	507	8.11	96.6	23.3	5	1.8	109.836	0.1
	2.5 g/L	7.57	488	8.27	98.5	23.3	4.5	1.6	97.632	0.15
	6.25 g/L	7.61	494	8.33	99	23.2	4.4	1.55	94.581	0.075
	15.6 g/L	7.6	502	8.21	97.9	23.4	4.5	1.6	97.632	0.05
mean		7.60933	537.214	8.24533	98.58	23.1333	4.94	1.76667	107.802	0.968333
SD		0.0570925	41.9084	0.144908	1.05148	0.28441	0.442418	0.164992	10.0678	0.918807

## Sheet: mortality
Treatment		dead individuals on day
		1	2	3	4	5	6	7	8	9	10	11	12	13	14		1 = dead
NC	1	0	0	0	0	0	0	0	0	0	0	0	0	0	0		0 = abnormal behavior (e.g. back position)
	2	0	0	0	0	0	0	0	0	0	0	0	0	0	0		0 = normal
	3	0	0	0	0	0	0	0	0	0	0	0	0	0	0
	4	0	0	0	0	0	0	0	0	0	0	0	0	0	0
	5	0	0	0	0	0	0	0	0	0	0	0	0	0	0
	6	0	0	0	0	0	0	0	0	0	0	0	0	0	0
	7	0	0	0	0	0	0	0	0	0	0	0	0	0	0
	8	0	0	0	0	0	0	0	0	0	0	0	0	0	0
PC	1	0	0	1	1	1	1	1	1	1	1	1	1	1	1
	2	1	1	1	1	1	1	1	1	1	1	1	1	1	1
	3	0	0	0	0	0	1	1	1	1	1	1	1	1	1
	4	1	1	1	1	1	1	1	1	1	1	1	1	1	1
	5	0	1	1	1	1	1	1	1	1	1	1	1	1	1
	6	1	1	1	1	1	1	1	1	1	1	1	1	1	1
	7	1	1	1	1	1	1	1	1	1	1	1	1	1	1
	8	1	1	1	1	1	1	1	1	1	1	1	1	1	1
SC	1	0	0	0	0	0	0	0	0	0	0	0	0	0	0
	2	0	0	0	0	0	0	0	0	0	0	0	0	0	0
	3	0	0	0	0	0	0	0	0	0	0	0	0	0	0
	4	0	0	0	0	0	0	0	0	0	0	0	0	0	0
	5	0	0	0	0	0	0	0	0	0	0	0	0	0	0
	6	0	0	0	0	0	0	0	0	0	0	0	0	0	0
	7	0	0	0	0	0	0	0	0	0	0	0	1	1	1
	8	0	0	0	0	0	0	0	0	0	0	0	0	0	0
0.4 g/L	1	0	0	0	0	0	0	0	0	0	0	0	0	0	0
	2	0	0	0	0	0	0	0	0	0	0	0	0	0	0
	3	0	0	0	0	0	0	0	0	0	0	0	0	0	0
	4	0	0	0	0	0	0	0	0	0	0	0	0	0	0
	5	0	0	0	0	0	0	0	0	0	0	0	0	0	0
	6	0	0	0	0	0	0	0	0	0	0	0	0	0	0
	7	0	0	0	0	0	0	0	0	0	0	0	0	0	0
	8	0	0	0	0	0	0	0	0	0	0	0	0	0	0
1 g/L	1	0	0	0	0	0	0	0	0	0	0	0	0	0	0
	2	0	0	0	0	0	0	0	0	0	0	0	0	0	0
	3	0	0	0	0	0	0	0	0	0	0	0	0	0	0
	4	0	0	0	0	0	0	0	0	0	0	0	0	0	0
	5	0	0	0	0	0	0	0	0	0	0	0	0	0	0
	6	0	0	0	0	0	0	0	0	0	0	0	0	0	0
	7	0	0	0	0	0	0	0	0	0	0	0	0	0	0
	8	0	0	0	0	0	0	0	0	0	0	0	0	0	0
2.5 g/L	1	0	0	0	0	0	0	0	0	0	0	0	0	0	0
	2	0	0	0	0	0	0	0	0	0	0	0	0	0	0
	3	0	0	0	0	0	0	0	0	0	0	0	0	0	0
	4	0	0	0	0	0	0	0	0	0	0	0	0	0	0
	5	0	0	0	0	0	0	0	0	0	0	0	0	0	0
	6	0	0	0	0	0	0	0	0	0	0	0	0	0	0
	7	0	0	0	0	0	0	0	0	0	0	0	0	0	0
	8	0	0	0	0	0	0	0	0	0	0	0	0	0	0
6.25 g/L	1	0	0	0	0	0	0	0	0	0	0	0	0	0	0
	2	0	0	0	0	0	0	0	0	0	0	0	0	0	0
	3	0	0	0	0	0	0	0	0	0	0	0	0	0	0
	4	0	0	0	0	0	0	0	beim Häuten gestorben	1	1	1	1	1	1
	5	0	0	0	0	0	0	0	0	0	0	0	0	0	0
	6	0	0	0	0	0	0	0	0	0	0	0	0	0	0
	7	0	0	0	0	0	0	0	0	0	0	0	0	0	0
	8	0	0	0	0	0	0	0	0	0	0	0	0	0	0
15.6 g/L	1	0	0	0	0	0	0	0	0	0	0	0	0	0	0
	2	0	0	0	0	0	0	0	0	0	0	0	0	0	0
	3	0	0	0	0	0	0	0	0	0	0	0	0	0	0
	4	0	0	0	0	0	0	0	0	0	0	0	0	0	0
	5	0	0	0	0	0	0	0	0	0	0	0	0	0	0
	6	0	0	0	0	0	0	0	0	0	0	0	0	0	0
	7	0	0	0	0	0	0	0	0	0	0	0	0	0	0
	8	0	0	0	0	0	0	0	0	0	0	0	0	0	0

## Sheet: ecdysis
Treatment		ecdysis on day														no. of ecdysis			inter-molt-period [d]
		1	2	3	4	5	6	7	8	9	10	11	12	13	14	per replicate	mean	SD
NC	1	0	0	0	0	0	0	0	0	0	1	0	0	0	0	1	1.125	0.330719			1 = new exuviae found
	2	0	0	0	0	0	1	0	0	0	0	0	0	0	0	1					0 = no new exuviae
	3	0	0	0	0	0	0	0	1	0	0	0	0	0	0	1
	4	0	0	0	0	0	0	0	0	0	1	0	0	0	0	1
	5	0	1	0	0	0	0	0	0	0	0	1	0	0	0	2			9
	6	0	0	0	0	0	0	1	0	0	0	0	0	0	0	1
	7	0	0	0	0	1	0	0	0	0	0	0	0	0	0	1
	8	0	0	0	1	0	0	0	0	0	0	0	0	0	0	1
PC	1	0	0													0	0.375	0.484123
	2	0														0
	3	0	0	0	0	0										0
	4	0														0
	5	0	1													1
	6	1														1
	7	0														0
	8	1														1
SC	1	0	0	0	0	0	0	1	0	0	0	0	0	0	0	1	1.375	0.484123
	2	0	0	0	0	0	1	0	0	0	0	0	0	0	1	2			8
	3	0	0	1	0	0	0	0	0	0	0	0	0	0	1	2			11
	4	0	0	0	0	0	0	0	0	0	1	0	0	0	0	1
	5	0	0	0	0	0	0	1	0	0	0	0	0	0	0	1
	6	0	0	0	0	0	0	1	0	0	0	0	0	0	0	1
	7	0	0	0	1	0	0	0	0	0	0	0				1
	8	0	1	0	0	0	0	0	0	0	0	1	0	0	0	2			9
0.4 g/L	1	0	0	0	0	0	1	0	0	0	0	0	0	0	0	1	1	0.5
	2	0	0	0	0	0	0	0	0	0	0	1	0	0	0	1
	3	1	0	0	0	0	0	0	0	0	0	1	0	0	0	2			10
	4	0	0	0	0	0	0	0	0	1	0	0	0	0	0	1
	5	0	0	0	0	0	0	0	0	0	0	1	0	0	0	1
	6	0	0	0	0	0	0	0	0	0	0	0	0	0	0	0
	7	0	0	0	0	0	0	1	0	0	0	0	0	0	0	1
	8	0	0	0	1	0	0	0	0	0	0	0	0	0	0	1
1 g/L	1	0	0	0	1	0	0	0	0	0	0	0	0	0	0	1	1.375	0.484123
	2	0	0	0	0	0	0	0	0	0	0	1	0	0	0	1
	3	0	0	0	0	0	0	0	0	1	0	0	0	0	0	1
	4	1	0	0	0	0	0	0	0	0	0	0	0	0	1	2			13
	5	0	0	0	0	0	1	0	0	0	0	0	0	0	0	1
	6	0	0	0	0	0	1	0	0	0	0	0	0	0	0	1
	7	0	1	0	0	0	0	0	0	0	0	0	0	0	1	2			12
	8	0	0	1	0	0	0	0	0	0	0	0	0	1	0	2			10
2.5 g/L	1	0	0	0	0	0	0	1	0	0	0	0	0	0	0	1	1.25	0.433013
	2	0	0	0	0	0	0	0	1	0	0	0	0	0	0	1
	3	1	0	0	0	0	0	0	0	0	0	1	0	0	0	2			10
	4	0	0	0	0	1	0	0	0	0	0	0	0	0	0	1
	5	0	0	0	0	0	0	0	0	0	1	0	0	0	0	1
	6	0	0	0	0	0	0	0	0	0	0	1	0	0	0	1
	7	0	1	0	0	0	0	0	0	0	0	0	1	0	0	2			10
	8	0	0	0	0	0	0	0	1	0	0	0	0	0	0	1
6.25 g/L	1	0	1	0	0	0	0	0	0	0	0	0	0	0	0	1	1.125	0.330719
	2	0	0	1	0	0	0	0	0	0	0	0	0	0	1	2			11
	3	0	0	0	0	0	0	0	0	0	0	1	0	0	0	1
	4	0	0	0	0	0	0	0	1							1
	5	0	0	0	0	0	0	0	1	0	0	0	0	0	0	1
	6	0	0	0	0	0	0	1	0	0	0	0	0	0	0	1
	7	0	0	0	0	0	1	0	0	0	0	0	0	0	0	1
	8	0	0	0	0	0	0	0	1	0	0	0	0	0	0	1
15.6 g/L	1	0	0	0	0	0	1	0	0	0	0	0	0	0	0	1	1.5	0.5
	2	0	0	0	0	0	1	0	0	0	0	0	0	0	0	1
	3	0	0	1	0	0	0	0	0	0	0	0	0	0	1	2			11
	4	0	0	0	0	0	0	1	0	0	0	0	0	0	0	1
	5	1	0	0	0	0	0	0	0	0	0	1	0	0	0	2			10
	6	0	0	0	0	1	0	0	0	0	0	0	0	0	0	1
	7	0	0	1	0	0	0	0	0	0	0	0	1	0	0	2			9
	8	0	0	0	1	0	0	0	0	0	1	0	0	0	0	2			6
															Mean	1.25926
															SD	0.478624

## Sheet: body parameter
Treatment		sex	body length	carapax length
		(0=f, 1=m)	[mm]	[mm]
NC	1	0	10.52	4.38
	2	1	10.55	4.37
	3	1	10.83	4.5			Body length	Mean	11.9944
	4	0	13.02	5.41				SD	1.04432
	5	1	11.51	4.68				% males	53.9683
	6	1	11.25	4.68
	7	1	11.28	4.5
	8	0	10.87	4.74
PC	1	1	11.88	5.1
	2	1	11.22	4.66
	3	0	13.31	6.07
	4	1	11.76	4.86
	5	0				not measureable anymore
	6	1	11.6	4.66
	7	1	12.13	5.06
	8	1				not measureable anymore
SC	1	1	10.98	4.39
	2	1	13.7	6.12
	3	1	11.98	5.05
	4	1	11.23	4.53
	5	0	10.54	4.55
	6	0	12.1	4.97
	7	1				not measureable anymore
	8	1	10.98	4.6
0.4 g/L	1	0	12.88	5.03
	2	0	12.61	5.5
	3	1	11.38	4.51
	4	1	11.72	4.8
	5	1	12.25	4.81
	6	1	11.67	5.15
	7	1	11.21	4.52
	8	1	12.96	4.83
1 g/L	1	1	11.2	4.66
	2	1	11.31	4.58
	3	0	11.05	4.7
	4	0	12.21	5.42
	5	1	11.19	4.6
	6	1	12.38	5.21
	7	0	12.8	4.92
	8	0	13.05	5.31
2.5 g/L	1	1	12.38	4.91
	2	1	10.75	4.68
	3	0	13.12	5.18
	4	1	11.05	4.29
	5	0	12.06	4.76
	6	0	14.17	5.77
	7	0	13.84	5.44
	8	1	10.66	4.42
6.25 g/L	1	0	11.03	4.65
	2	0	11.66	4.8
	3	1	11.32	4.56
	4					not measureable anymore
	5	0	14.74	6.47
	6	1	11.55	4.61
	7	0	12.29	4.97
	8	0	11.36	4.78
15.6 g/L	1	0	12.39	5.5
	2	0	13.43	5.75
	3	0	12.06	5.29
	4	1	11.54	4.9
	5	0	12.9	5.26
	6	0	13.7	5.84
	7	0	14.04	5.42
	8	0	12.45	5.06
T0	1	0	11.93	4.87
	2	0	14.01	5.88
	3	0	10.83	4.31
	4	0	11.29	4.43
	5	1	11.16	4.48
	6	0	13.09	5.55
	7	1	12.91	5.24
	8	1	11.5	4.52
	9	1	12.47	5.08
	10	0	11.07	4.67

## Sheet: room temperature
Date Time, GMT+02:00	Temp, °C	RH, %				Temp, °C	RH, %
2019-04-12 08:07:54	25.125	10.8			Mean	25.082	15.4368
2019-04-12 08:22:54	25.125	21.5			SD	0.213744	8.66512
2019-04-12 08:37:54	25.125	10.8			Min	23.484	10.8
2019-04-12 08:52:54	25.125	10.8			Max	25.513	32.3
2019-04-12 09:07:54	25.125	10.8
2019-04-12 09:22:54	25.125	10.8
2019-04-12 09:37:54	25.222	21.5
2019-04-12 09:52:54	25.222	21.5
2019-04-12 10:07:54	25.222	21.5
2019-04-12 10:22:54	25.222	21.5
2019-04-12 10:37:54	25.222	21.5
2019-04-12 10:52:54	25.222	21.5
2019-04-12 11:07:54	25.319	21.5
2019-04-12 11:22:54	25.319	10.8
2019-04-12 11:37:54	25.222	10.8
2019-04-12 11:52:54	25.222	10.8
2019-04-12 12:07:54	25.222	10.8
2019-04-12 12:22:54	25.222	10.8
2019-04-12 12:37:54	25.222	10.8
2019-04-12 12:52:54	25.222	10.8
2019-04-12 13:07:54	25.222	10.8
2019-04-12 13:22:54	25.222	10.8
2019-04-12 13:37:54	25.222	21.5
2019-04-12 13:52:54	25.319	10.8
2019-04-12 14:07:54	25.222	10.8
2019-04-12 14:22:54	25.222	10.8
2019-04-12 14:37:54	25.222	10.8
2019-04-12 14:52:54	25.222	10.8
2019-04-12 15:07:54	25.125	10.8
2019-04-12 15:22:54	25.125	10.8
2019-04-12 15:37:54	25.125	10.8
2019-04-12 15:52:54	25.222	10.8
2019-04-12 16:07:54	25.222	10.8
2019-04-12 16:22:54	25.222	10.8
2019-04-12 16:37:54	25.125	10.8
2019-04-12 16:52:54	25.125	10.8
2019-04-12 17:07:54	25.125	10.8
2019-04-12 17:22:54	25.125	10.8
2019-04-12 17:37:54	25.125	10.8
2019-04-12 17:52:54	25.125	10.8
2019-04-12 18:07:54	25.125	10.8
2019-04-12 18:22:54	25.125	10.8
2019-04-12 18:37:54	25.125	10.8
2019-04-12 18:52:54	25.125	10.8
2019-04-12 19:07:54	25.125	10.8
2019-04-12 19:22:54	25.125	10.8
2019-04-12 19:37:54	25.125	10.8
2019-04-12 19:52:54	25.125	10.8
2019-04-12 20:07:54	25.125	10.8
2019-04-12 20:22:54	25.125	10.8
2019-04-12 20:37:54	25.125	10.8
2019-04-12 20:52:54	25.125	10.8
2019-04-12 21:07:54	25.125	10.8
2019-04-12 21:22:54	25.125	10.8
2019-04-12 21:37:54	25.125	10.8
2019-04-12 21:52:54	25.125	10.8
2019-04-12 22:07:54	25.125	10.8
2019-04-12 22:22:54	25.125	10.8
2019-04-12 22:37:54	25.125	10.8
2019-04-12 22:52:54	25.125	10.8
2019-04-12 23:07:54	25.028	10.8
2019-04-12 23:22:54	25.028	10.8
2019-04-12 23:37:54	25.028	10.8
2019-04-12 23:52:54	25.028	10.8
2019-05-12 00:07:54	25.028	10.8
2019-05-12 00:22:54	25.028	10.8
2019-05-12 00:37:54	25.028	10.8
2019-05-12 00:52:54	25.125	10.8
2019-05-12 01:07:54	25.125	10.8
2019-05-12 01:22:54	25.125	10.8
2019-05-12 01:37:54	25.125	10.8
2019-05-12 01:52:54	25.125	10.8
2019-05-12 02:07:54	25.125	10.8
2019-05-12 02:22:54	25.028	10.8
2019-05-12 02:37:54	25.028	10.8
2019-05-12 02:52:54	24.931	10.8
2019-05-12 03:07:54	24.931	10.8
2019-05-12 03:22:54	25.028	10.8
2019-05-12 03:37:54	25.028	10.8
2019-05-12 03:52:54	25.028	10.8
2019-05-12 04:07:54	25.125	10.8
2019-05-12 04:22:54	25.222	10.8
2019-05-12 04:37:54	25.125	10.8
2019-05-12 04:52:54	25.125	10.8
2019-05-12 05:07:54	25.125	10.8
2019-05-12 05:22:54	25.125	10.8
2019-05-12 05:37:54	25.125	10.8
2019-05-12 05:52:54	25.125	10.8
2019-05-12 06:07:54	25.125	10.8
2019-05-12 06:22:54	25.125	10.8
2019-05-12 06:37:54	25.028	10.8
2019-05-12 06:52:54	25.125	10.8
2019-05-12 07:07:54	25.125	10.8
2019-05-12 07:22:54	25.028	10.8
2019-05-12 07:37:54	25.028	10.8
2019-05-12 07:52:54	24.931	10.8
2019-05-12 08:07:54	24.931	10.8
2019-05-12 08:22:54	24.835	10.8
2019-05-12 08:37:54	25.028	10.8
2019-05-12 08:52:54	25.125	10.8
2019-05-12 09:07:54	25.222	10.8
2019-05-12 09:22:54	25.222	32.3
2019-05-12 09:37:54	25.222	32.3
2019-05-12 09:52:54	25.222	32.3
2019-05-12 10:07:54	25.222	32.3
2019-05-12 10:22:54	25.125	32.3
2019-05-12 10:37:54	25.125	32.3
2019-05-12 10:52:54	25.125	32.3
2019-05-12 11:07:54	25.125	21.5
2019-05-12 11:22:54	25.125	32.3
2019-05-12 11:37:54	25.319	32.3
2019-05-12 11:52:54	25.416	32.3
2019-05-12 12:07:54	25.513	32.3
2019-05-12 12:22:54	25.416	32.3
2019-05-12 12:37:54	25.319	32.3
2019-05-12 12:52:54	25.222	32.3
2019-05-12 13:07:54	25.125	32.3
2019-05-12 13:22:54	25.222	32.3
2019-05-12 13:37:54	25.222	32.3
2019-05-12 13:52:54	25.222	32.3
2019-05-12 14:07:54	25.319	32.3
2019-05-12 14:22:54	25.222	32.3
2019-05-12 14:37:54	25.222	32.3
2019-05-12 14:52:54	25.222	32.3
2019-05-12 15:07:54	25.222	32.3
2019-05-12 15:22:54	25.222	32.3
2019-05-12 15:37:54	25.222	32.3
2019-05-12 15:52:54	25.222	32.3
2019-05-12 16:07:54	25.222	32.3
2019-05-12 16:22:54	25.222	32.3
2019-05-12 16:37:54	25.222	32.3
2019-05-12 16:52:54	25.222	32.3
2019-05-12 17:07:54	25.222	32.3
2019-05-12 17:22:54	25.222	21.5
2019-05-12 17:37:54	25.222	32.3
2019-05-12 17:52:54	25.222	32.3
2019-05-12 18:07:54	25.222	32.3
2019-05-12 18:22:54	25.125	32.3
2019-05-12 18:37:54	25.125	32.3
2019-05-12 18:52:54	25.125	32.3
2019-05-12 19:07:54	25.028	32.3
2019-05-12 19:22:54	25.028	32.3
2019-05-12 19:37:54	25.028	32.3
2019-05-12 19:52:54	25.222	32.3
2019-05-12 20:07:54	25.319	32.3
2019-05-12 20:22:54	25.319	32.3
2019-05-12 20:37:54	25.319	32.3
2019-05-12 20:52:54	25.222	32.3
2019-05-12 21:07:54	25.222	32.3
2019-05-12 21:22:54	25.222	32.3
2019-05-12 21:37:54	25.222	32.3
2019-05-12 21:52:54	25.222	32.3
2019-05-12 22:07:54	25.222	21.5
2019-05-12 22:22:54	25.222	32.3
2019-05-12 22:37:54	25.222	32.3
2019-05-12 22:52:54	25.222	32.3
2019-05-12 23:07:54	25.222	32.3
2019-05-12 23:22:54	25.222	32.3
2019-05-12 23:37:54	25.125	32.3
2019-05-12 23:52:54	25.125	32.3
2019-06-12 00:07:54	25.222	32.3
2019-06-12 00:22:54	25.222	32.3
2019-06-12 00:37:54	25.222	32.3
2019-06-12 00:52:54	25.125	32.3
2019-06-12 01:07:54	25.125	32.3
2019-06-12 01:22:54	25.222	21.5
2019-06-12 01:37:54	25.125	32.3
2019-06-12 01:52:54	25.125	32.3
2019-06-12 02:07:54	25.125	32.3
2019-06-12 02:22:54	25.125	32.3
2019-06-12 02:37:54	25.125	32.3
2019-06-12 02:52:54	25.125	32.3
2019-06-12 03:07:54	25.125	32.3
2019-06-12 03:22:54	25.125	32.3
2019-06-12 03:37:54	25.125	32.3
2019-06-12 03:52:54	25.222	32.3
2019-06-12 04:07:54	25.222	32.3
2019-06-12 04:22:54	25.222	21.5
2019-06-12 04:37:54	25.222	32.3
2019-06-12 04:52:54	25.125	32.3
2019-06-12 05:07:54	25.028	32.3
2019-06-12 05:22:54	24.931	32.3
2019-06-12 05:37:54	24.931	21.5
2019-06-12 05:52:54	25.028	32.3
2019-06-12 06:07:54	25.222	32.3
2019-06-12 06:22:54	25.222	32.3
2019-06-12 06:37:54	25.319	32.3
2019-06-12 06:52:54	25.222	32.3
2019-06-12 07:07:54	25.222	32.3
2019-06-12 07:22:54	25.222	32.3
2019-06-12 07:37:54	25.125	32.3
2019-06-12 07:52:54	25.125	21.5
2019-06-12 08:07:54	25.125	32.3
2019-06-12 08:22:54	25.222	21.5
2019-06-12 08:37:54	25.222	32.3
2019-06-12 08:52:54	25.222	32.3
2019-06-12 09:07:54	25.222	32.3
2019-06-12 09:22:54	25.222	32.3
2019-06-12 09:37:54	25.222	21.5
2019-06-12 09:52:54	25.222	10.8
2019-06-12 10:07:54	25.125	10.8
2019-06-12 10:22:54	25.028	10.8
2019-06-12 10:37:54	24.931	10.8
2019-06-12 10:52:54	24.835	10.8
2019-06-12 11:07:54	24.835	10.8
2019-06-12 11:22:54	24.835	10.8
2019-06-12 11:37:54	24.835	10.8
2019-06-12 11:52:54	24.835	10.8
2019-06-12 12:07:54	24.835	10.8
2019-06-12 12:22:54	24.931	10.8
2019-06-12 12:37:54	25.125	10.8
2019-06-12 12:52:54	25.222	10.8
2019-06-12 13:07:54	25.222	10.8
2019-06-12 13:22:54	25.222	10.8
2019-06-12 13:37:54	25.222	21.5
2019-06-12 13:52:54	25.222	21.5
2019-06-12 14:07:54	25.125	10.8
2019-06-12 14:22:54	25.125	21.5
2019-06-12 14:37:54	25.125	21.5
2019-06-12 14:52:54	25.125	10.8
2019-06-12 15:07:54	25.125	21.5
2019-06-12 15:22:54	25.125	21.5
2019-06-12 15:37:54	25.125	21.5
2019-06-12 15:52:54	25.222	10.8
2019-06-12 16:07:54	25.222	10.8
2019-06-12 16:22:54	25.222	10.8
2019-06-12 16:37:54	25.125	10.8
2019-06-12 16:52:54	25.125	10.8
2019-06-12 17:07:54	25.028	10.8
2019-06-12 17:22:54	25.028	10.8
2019-06-12 17:37:54	25.028	10.8
2019-06-12 17:52:54	25.028	10.8
2019-06-12 18:07:54	25.028	10.8
2019-06-12 18:22:54	25.028	10.8
2019-06-12 18:37:54	25.028	10.8
2019-06-12 18:52:54	25.028	10.8
2019-06-12 19:07:54	25.028	10.8
2019-06-12 19:22:54	25.028	10.8
2019-06-12 19:37:54	25.028	10.8
2019-06-12 19:52:54	25.028	10.8
2019-06-12 20:07:54	25.028	10.8
2019-06-12 20:22:54	25.028	10.8
2019-06-12 20:37:54	25.028	10.8
2019-06-12 20:52:54	25.028	10.8
2019-06-12 21:07:54	25.028	10.8
2019-06-12 21:22:54	24.931	10.8
2019-06-12 21:37:54	24.931	10.8
2019-06-12 21:52:54	25.028	10.8
2019-06-12 22:07:54	24.931	10.8
2019-06-12 22:22:54	25.028	10.8
2019-06-12 22:37:54	24.931	10.8
2019-06-12 22:52:54	24.931	10.8
2019-06-12 23:07:54	24.931	10.8
2019-06-12 23:22:54	24.931	10.8
2019-06-12 23:37:54	24.931	10.8
2019-06-12 23:52:54	24.931	10.8
2019-07-12 00:07:54	24.931	10.8
2019-07-12 00:22:54	24.931	10.8
2019-07-12 00:37:54	24.931	10.8
2019-07-12 00:52:54	24.931	10.8
2019-07-12 01:07:54	25.028	10.8
2019-07-12 01:22:54	25.028	10.8
2019-07-12 01:37:54	24.931	10.8
2019-07-12 01:52:54	24.931	10.8
2019-07-12 02:07:54	25.028	10.8
2019-07-12 02:22:54	25.028	10.8
2019-07-12 02:37:54	25.028	10.8
2019-07-12 02:52:54	25.028	10.8
2019-07-12 03:07:54	25.028	10.8
2019-07-12 03:22:54	25.028	10.8
2019-07-12 03:37:54	25.028	10.8
2019-07-12 03:52:54	25.028	10.8
2019-07-12 04:07:54	25.028	10.8
2019-07-12 04:22:54	25.028	10.8
2019-07-12 04:37:54	25.028	10.8
2019-07-12 04:52:54	25.028	10.8
2019-07-12 05:07:54	25.028	10.8
2019-07-12 05:22:54	25.028	10.8
2019-07-12 05:37:54	25.028	10.8
2019-07-12 05:52:54	25.028	10.8
2019-07-12 06:07:54	24.931	10.8
2019-07-12 06:22:54	25.028	10.8
2019-07-12 06:37:54	25.028	10.8
2019-07-12 06:52:54	25.028	10.8
2019-07-12 07:07:54	25.028	10.8
2019-07-12 07:22:54	25.028	10.8
2019-07-12 07:37:54	24.931	10.8
2019-07-12 07:52:54	24.931	10.8
2019-07-12 08:07:54	25.028	10.8
2019-07-12 08:22:54	25.028	10.8
2019-07-12 08:37:54	25.028	10.8
2019-07-12 08:52:54	25.028	10.8
2019-07-12 09:07:54	25.028	10.8
2019-07-12 09:22:54	25.222	32.3
2019-07-12 09:37:54	25.222	32.3
2019-07-12 09:52:54	25.222	32.3
2019-07-12 10:07:54	25.319	32.3
2019-07-12 10:22:54	25.319	32.3
2019-07-12 10:37:54	25.319	32.3
2019-07-12 10:52:54	25.416	32.3
2019-07-12 11:07:54	25.319	32.3
2019-07-12 11:22:54	25.416	32.3
2019-07-12 11:37:54	25.416	32.3
2019-07-12 11:52:54	25.319	32.3
2019-07-12 12:07:54	25.319	32.3
2019-07-12 12:22:54	25.319	32.3
2019-07-12 12:37:54	25.319	32.3
2019-07-12 12:52:54	25.319	32.3
2019-07-12 13:07:54	25.319	32.3
2019-07-12 13:22:54	25.319	32.3
2019-07-12 13:37:54	25.319	32.3
2019-07-12 13:52:54	25.319	32.3
2019-07-12 14:07:54	25.319	32.3
2019-07-12 14:22:54	25.319	32.3
2019-07-12 14:37:54	25.319	32.3
2019-07-12 14:52:54	25.319	32.3
2019-07-12 15:07:54	25.319	32.3
2019-07-12 15:22:54	25.319	32.3
2019-07-12 15:37:54	25.222	32.3
2019-07-12 15:52:54	25.319	32.3
2019-07-12 16:07:54	25.222	32.3
2019-07-12 16:22:54	25.222	32.3
2019-07-12 16:37:54	25.222	32.3
2019-07-12 16:52:54	25.222	32.3
2019-07-12 17:07:54	25.222	32.3
2019-07-12 17:22:54	25.222	32.3
2019-07-12 17:37:54	25.222	32.3
2019-07-12 17:52:54	25.222	32.3
2019-07-12 18:07:54	25.222	32.3
2019-07-12 18:22:54	25.222	32.3
2019-07-12 18:37:54	25.222	32.3
2019-07-12 18:52:54	25.222	32.3
2019-07-12 19:07:54	25.222	32.3
2019-07-12 19:22:54	25.222	32.3
2019-07-12 19:37:54	25.222	32.3
2019-07-12 19:52:54	25.319	32.3
2019-07-12 20:07:54	25.319	32.3
2019-07-12 20:22:54	25.319	32.3
2019-07-12 20:37:54	25.319	32.3
2019-07-12 20:52:54	25.319	32.3
2019-07-12 21:07:54	25.319	21.5
2019-07-12 21:22:54	25.319	32.3
2019-07-12 21:37:54	25.319	32.3
2019-07-12 21:52:54	25.319	32.3
2019-07-12 22:07:54	25.319	32.3
2019-07-12 22:22:54	25.319	21.5
2019-07-12 22:37:54	25.319	32.3
2019-07-12 22:52:54	25.319	32.3
2019-07-12 23:07:54	25.319	32.3
2019-07-12 23:22:54	25.319	32.3
2019-07-12 23:37:54	25.319	32.3
2019-07-12 23:52:54	25.319	32.3
2019-08-12 00:07:54	25.319	32.3
2019-08-12 00:22:54	25.319	32.3
2019-08-12 00:37:54	25.319	32.3
2019-08-12 00:52:54	25.319	32.3
2019-08-12 01:07:54	25.319	32.3
2019-08-12 01:22:54	25.319	32.3
2019-08-12 01:37:54	25.222	32.3
2019-08-12 01:52:54	25.222	32.3
2019-08-12 02:07:54	25.222	32.3
2019-08-12 02:22:54	25.222	32.3
2019-08-12 02:37:54	25.222	32.3
2019-08-12 02:52:54	25.222	32.3
2019-08-12 03:07:54	25.222	32.3
2019-08-12 03:22:54	25.222	21.5
2019-08-12 03:37:54	25.222	32.3
2019-08-12 03:52:54	25.222	21.5
2019-08-12 04:07:54	25.222	32.3
2019-08-12 04:22:54	25.222	32.3
2019-08-12 04:37:54	25.222	21.5
2019-08-12 04:52:54	25.222	32.3
2019-08-12 05:07:54	25.222	32.3
2019-08-12 05:22:54	25.222	32.3
2019-08-12 05:37:54	25.222	32.3
2019-08-12 05:52:54	25.222	32.3
2019-08-12 06:07:54	25.222	32.3
2019-08-12 06:22:54	25.222	32.3
2019-08-12 06:37:54	25.222	32.3
2019-08-12 06:52:54	25.222	32.3
2019-08-12 07:07:54	25.222	32.3
2019-08-12 07:22:54	25.222	32.3
2019-08-12 07:37:54	25.222	32.3
2019-08-12 07:52:54	25.222	32.3
2019-08-12 08:07:54	25.222	32.3
2019-08-12 08:22:54	25.222	32.3
2019-08-12 08:37:54	25.222	32.3
2019-08-12 08:52:54	25.222	32.3
2019-08-12 09:07:54	25.222	32.3
2019-08-12 09:22:54	25.222	10.8
2019-08-12 09:37:54	25.222	10.8
2019-08-12 09:52:54	25.222	10.8
2019-08-12 10:07:54	25.222	10.8
2019-08-12 10:22:54	25.222	10.8
2019-08-12 10:37:54	25.222	21.5
2019-08-12 10:52:54	25.222	10.8
2019-08-12 11:07:54	25.222	10.8
2019-08-12 11:22:54	25.222	10.8
2019-08-12 11:37:54	25.222	10.8
2019-08-12 11:52:54	25.222	10.8
2019-08-12 12:07:54	25.125	10.8
2019-08-12 12:22:54	25.125	10.8
2019-08-12 12:37:54	25.125	10.8
2019-08-12 12:52:54	25.125	10.8
2019-08-12 13:07:54	25.125	10.8
2019-08-12 13:22:54	25.125	10.8
2019-08-12 13:37:54	25.125	10.8
2019-08-12 13:52:54	25.125	10.8
2019-08-12 14:07:54	25.125	10.8
2019-08-12 14:22:54	25.125	10.8
2019-08-12 14:37:54	25.125	10.8
2019-08-12 14:52:54	25.125	10.8
2019-08-12 15:07:54	25.125	10.8
2019-08-12 15:22:54	25.125	10.8
2019-08-12 15:37:54	25.125	10.8
2019-08-12 15:52:54	25.125	10.8
2019-08-12 16:07:54	25.125	10.8
2019-08-12 16:22:54	25.125	10.8
2019-08-12 16:37:54	25.125	10.8
2019-08-12 16:52:54	25.125	10.8
2019-08-12 17:07:54	25.125	10.8
2019-08-12 17:22:54	25.125	10.8
2019-08-12 17:37:54	25.125	10.8
2019-08-12 17:52:54	25.125	10.8
2019-08-12 18:07:54	25.125	10.8
2019-08-12 18:22:54	25.125	10.8
2019-08-12 18:37:54	25.125	10.8
2019-08-12 18:52:54	25.125	10.8
2019-08-12 19:07:54	25.125	10.8
2019-08-12 19:22:54	25.125	10.8
2019-08-12 19:37:54	25.125	10.8
2019-08-12 19:52:54	25.028	10.8
2019-08-12 20:07:54	25.125	10.8
2019-08-12 20:22:54	25.125	10.8
2019-08-12 20:37:54	25.125	10.8
2019-08-12 20:52:54	25.125	10.8
2019-08-12 21:07:54	25.125	10.8
2019-08-12 21:22:54	25.125	10.8
2019-08-12 21:37:54	25.125	10.8
2019-08-12 21:52:54	25.125	10.8
2019-08-12 22:07:54	25.125	10.8
2019-08-12 22:22:54	25.125	10.8
2019-08-12 22:37:54	25.125	10.8
2019-08-12 22:52:54	25.125	10.8
2019-08-12 23:07:54	25.125	10.8
2019-08-12 23:22:54	25.125	10.8
2019-08-12 23:37:54	25.125	10.8
2019-08-12 23:52:54	25.125	10.8
2019-09-12 00:07:54	25.125	10.8
2019-09-12 00:22:54	25.125	10.8
2019-09-12 00:37:54	25.125	10.8
2019-09-12 00:52:54	25.125	10.8
2019-09-12 01:07:54	25.125	10.8
2019-09-12 01:22:54	25.028	10.8
2019-09-12 01:37:54	25.028	10.8
2019-09-12 01:52:54	25.028	10.8
2019-09-12 02:07:54	25.028	10.8
2019-09-12 02:22:54	25.028	10.8
2019-09-12 02:37:54	25.028	10.8
2019-09-12 02:52:54	25.125	10.8
2019-09-12 03:07:54	25.028	10.8
2019-09-12 03:22:54	25.028	10.8
2019-09-12 03:37:54	25.028	10.8
2019-09-12 03:52:54	25.028	10.8
2019-09-12 04:07:54	25.028	10.8
2019-09-12 04:22:54	25.028	10.8
2019-09-12 04:37:54	25.028	10.8
2019-09-12 04:52:54	25.028	10.8
2019-09-12 05:07:54	25.028	10.8
2019-09-12 05:22:54	25.028	10.8
2019-09-12 05:37:54	25.028	10.8
2019-09-12 05:52:54	25.028	10.8
2019-09-12 06:07:54	25.028	10.8
2019-09-12 06:22:54	25.028	10.8
2019-09-12 06:37:54	24.931	10.8
2019-09-12 06:52:54	24.931	10.8
2019-09-12 07:07:54	25.028	10.8
2019-09-12 07:22:54	25.028	10.8
2019-09-12 07:37:54	24.931	10.8
2019-09-12 07:52:54	24.931	10.8
2019-09-12 08:07:54	24.931	10.8
2019-09-12 08:22:00	24.931	10.8
2019-09-12 08:37:00	24.931	10.8
2019-09-12 08:52:00	24.931	10.8
2019-09-12 09:07:00	24.931	10.8
2019-09-12 09:22:00	24.931	10.8
2019-09-12 09:37:00	24.931	10.8
2019-09-12 09:52:00	25.028	10.8
2019-09-12 10:07:00	25.125	10.8
2019-09-12 10:22:00	25.028	10.8
2019-09-12 10:37:00	25.125	10.8
2019-09-12 10:52:00	25.125	10.8
2019-09-12 11:07:00	25.125	10.8
2019-09-12 11:22:00	25.125	10.8
2019-09-12 11:37:00	25.028	10.8
2019-09-12 11:52:00	25.125	10.8
2019-09-12 12:07:00	25.125	10.8
2019-09-12 12:22:00	25.125	10.8
2019-09-12 12:37:00	25.125	10.8
2019-09-12 12:52:00	25.125	10.8
2019-09-12 13:07:00	25.125	10.8
2019-09-12 13:22:00	25.125	10.8
2019-09-12 13:37:00	25.125	10.8
2019-09-12 13:52:00	25.125	10.8
2019-09-12 14:07:00	25.125	10.8
2019-09-12 14:22:00	25.222	10.8
2019-09-12 14:37:00	25.125	10.8
2019-09-12 14:52:00	25.125	10.8
2019-09-12 15:07:00	25.125	10.8
2019-09-12 15:22:00	25.125	10.8
2019-09-12 15:37:00	25.125	10.8
2019-09-12 15:52:00	25.125	10.8
2019-09-12 16:07:00	25.125	10.8
2019-09-12 16:22:00	25.125	10.8
2019-09-12 16:37:00	25.125	10.8
2019-09-12 16:52:00	25.125	10.8
2019-09-12 17:07:00	25.125	10.8
2019-09-12 17:22:00	25.125	10.8
2019-09-12 17:37:00	25.125	10.8
2019-09-12 17:52:00	25.125	10.8
2019-09-12 18:07:00	25.125	10.8
2019-09-12 18:22:00	25.125	10.8
2019-09-12 18:37:00	25.125	10.8
2019-09-12 18:52:00	25.125	10.8
2019-09-12 19:07:00	25.125	10.8
2019-09-12 19:22:00	25.222	10.8
2019-09-12 19:37:00	25.222	10.8
2019-09-12 19:52:00	25.222	10.8
2019-09-12 20:07:00	25.222	10.8
2019-09-12 20:22:00	25.222	10.8
2019-09-12 20:37:00	25.222	10.8
2019-09-12 20:52:00	25.319	10.8
2019-09-12 21:07:00	25.319	10.8
2019-09-12 21:22:00	25.319	10.8
2019-09-12 21:37:00	25.319	10.8
2019-09-12 21:52:00	25.222	10.8
2019-09-12 22:07:00	25.222	10.8
2019-09-12 22:22:00	25.222	10.8
2019-09-12 22:37:00	25.222	10.8
2019-09-12 22:52:00	25.222	10.8
2019-09-12 23:07:00	25.222	10.8
2019-09-12 23:22:00	25.222	10.8
2019-09-12 23:37:00	25.222	10.8
2019-09-12 23:52:00	25.222	10.8
2019-10-12 00:07:00	25.222	10.8
2019-10-12 00:22:00	25.222	10.8
2019-10-12 00:37:00	25.222	10.8
2019-10-12 00:52:00	25.222	10.8
2019-10-12 01:07:00	25.222	10.8
2019-10-12 01:22:00	25.222	10.8
2019-10-12 01:37:00	25.222	10.8
2019-10-12 01:52:00	25.222	10.8
2019-10-12 02:07:00	25.222	10.8
2019-10-12 02:22:00	25.222	10.8
2019-10-12 02:37:00	25.222	10.8
2019-10-12 02:52:00	25.222	10.8
2019-10-12 03:07:00	25.222	10.8
2019-10-12 03:22:00	25.222	10.8
2019-10-12 03:37:00	25.222	10.8
2019-10-12 03:52:00	25.222	10.8
2019-10-12 04:07:00	25.222	10.8
2019-10-12 04:22:00	25.222	10.8
2019-10-12 04:37:00	25.222	10.8
2019-10-12 04:52:00	25.222	10.8
2019-10-12 05:07:00	25.222	10.8
2019-10-12 05:22:00	25.125	10.8
2019-10-12 05:37:00	25.222	10.8
2019-10-12 05:52:00	25.319	10.8
2019-10-12 06:07:00	25.319	10.8
2019-10-12 06:22:00	25.222	10.8
2019-10-12 06:37:00	25.222	10.8
2019-10-12 06:52:00	25.222	10.8
2019-10-12 07:07:00	25.222	10.8
2019-10-12 07:22:00	25.222	10.8
2019-10-12 07:37:00	25.222	10.8
2019-10-12 07:52:00	25.125	10.8
2019-10-12 08:07:00	25.125	10.8
2019-10-12 08:22:00	25.125	10.8
2019-10-12 08:37:00	25.125	10.8
2019-10-12 08:52:00	25.125	10.8
2019-10-12 09:07:00	25.125	10.8
2019-10-12 09:22:00	25.125	10.8
2019-10-12 09:37:00	25.125	10.8
2019-10-12 09:52:00	25.125	10.8
2019-10-12 10:07:00	25.125	10.8
2019-10-12 10:22:00	25.222	10.8
2019-10-12 10:37:00	25.125	10.8
2019-10-12 10:52:00	25.125	10.8
2019-10-12 11:07:00	25.125	10.8
2019-10-12 11:22:00	25.125	10.8
2019-10-12 11:37:00	25.125	10.8
2019-10-12 11:52:00	25.125	10.8
2019-10-12 12:07:00	25.125	10.8
2019-10-12 12:22:00	25.125	10.8
2019-10-12 12:37:00	25.125	10.8
2019-10-12 12:52:00	25.222	10.8
2019-10-12 13:07:00	25.222	10.8
2019-10-12 13:22:00	25.222	10.8
2019-10-12 13:37:00	25.125	10.8
2019-10-12 13:52:00	25.125	10.8
2019-10-12 14:07:00	25.125	10.8
2019-10-12 14:22:00	25.125	10.8
2019-10-12 14:37:00	25.125	10.8
2019-10-12 14:52:00	25.125	10.8
2019-10-12 15:07:00	25.125	10.8
2019-10-12 15:22:00	25.125	10.8
2019-10-12 15:37:00	25.125	10.8
2019-10-12 15:52:00	25.125	10.8
2019-10-12 16:07:00	25.125	10.8
2019-10-12 16:22:00	25.125	10.8
2019-10-12 16:37:00	25.125	10.8
2019-10-12 16:52:00	25.125	10.8
2019-10-12 17:07:00	25.222	10.8
2019-10-12 17:22:00	25.222	10.8
2019-10-12 17:37:00	25.222	10.8
2019-10-12 17:52:00	25.222	10.8
2019-10-12 18:07:00	25.222	10.8
2019-10-12 18:22:00	25.125	10.8
2019-10-12 18:37:00	25.125	10.8
2019-10-12 18:52:00	25.222	10.8
2019-10-12 19:07:00	25.319	10.8
2019-10-12 19:22:00	25.416	10.8
2019-10-12 19:37:00	25.416	10.8
2019-10-12 19:52:00	25.319	10.8
2019-10-12 20:07:00	25.319	10.8
2019-10-12 20:22:00	25.222	10.8
2019-10-12 20:37:00	25.222	10.8
2019-10-12 20:52:00	25.222	10.8
2019-10-12 21:07:00	25.222	10.8
2019-10-12 21:22:00	25.222	10.8
2019-10-12 21:37:00	25.125	10.8
2019-10-12 21:52:00	25.222	10.8
2019-10-12 22:07:00	25.125	10.8
2019-10-12 22:22:00	25.125	10.8
2019-10-12 22:37:00	25.222	10.8
2019-10-12 22:52:00	25.222	10.8
2019-10-12 23:07:00	25.222	10.8
2019-10-12 23:22:00	25.222	10.8
2019-10-12 23:37:00	25.125	10.8
2019-10-12 23:52:00	25.125	10.8
2019-11-12 00:07:00	25.125	10.8
2019-11-12 00:22:00	25.125	10.8
2019-11-12 00:37:00	25.125	10.8
2019-11-12 00:52:00	25.125	10.8
2019-11-12 01:07:00	25.125	10.8
2019-11-12 01:22:00	25.125	10.8
2019-11-12 01:37:00	25.222	10.8
2019-11-12 01:52:00	25.222	10.8
2019-11-12 02:07:00	25.222	10.8
2019-11-12 02:22:00	25.222	10.8
2019-11-12 02:37:00	25.125	10.8
2019-11-12 02:52:00	25.125	10.8
2019-11-12 03:07:00	25.125	10.8
2019-11-12 03:22:00	25.125	10.8
2019-11-12 03:37:00	25.125	10.8
2019-11-12 03:52:00	25.125	10.8
2019-11-12 04:07:00	25.125	10.8
2019-11-12 04:22:00	25.125	10.8
2019-11-12 04:37:00	25.125	10.8
2019-11-12 04:52:00	25.222	10.8
2019-11-12 05:07:00	25.222	10.8
2019-11-12 05:22:00	25.222	10.8
2019-11-12 05:37:00	25.222	10.8
2019-11-12 05:52:00	25.125	10.8
2019-11-12 06:07:00	25.125	10.8
2019-11-12 06:22:00	25.125	10.8
2019-11-12 06:37:00	25.125	10.8
2019-11-12 06:52:00	25.125	10.8
2019-11-12 07:07:00	25.125	10.8
2019-11-12 07:22:00	25.125	10.8
2019-11-12 07:37:00	25.028	10.8
2019-11-12 07:52:00	25.028	10.8
2019-11-12 08:07:00	25.028	10.8
2019-11-12 08:22:00	24.931	10.8
2019-11-12 08:37:00	25.028	10.8
2019-11-12 08:52:00	24.931	10.8
2019-11-12 09:07:00	25.028	10.8
2019-11-12 09:22:00	25.125	32.3
2019-11-12 09:37:00	25.222	32.3
2019-11-12 09:52:00	25.319	32.3
2019-11-12 10:07:00	25.416	32.3
2019-11-12 10:22:00	25.319	32.3
2019-11-12 10:37:00	25.319	32.3
2019-11-12 10:52:00	25.319	32.3
2019-11-12 11:07:00	25.416	32.3
2019-11-12 11:22:00	25.319	32.3
2019-11-12 11:37:00	25.319	32.3
2019-11-12 11:52:00	25.319	32.3
2019-11-12 12:07:00	25.319	32.3
2019-11-12 12:22:00	25.319	32.3
2019-11-12 12:37:00	25.222	32.3
2019-11-12 12:52:00	25.222	32.3
2019-11-12 13:07:00	25.222	32.3
2019-11-12 13:22:00	25.222	32.3
2019-11-12 13:37:00	25.222	32.3
2019-11-12 13:52:00	25.222	32.3
2019-11-12 14:07:00	25.222	32.3
2019-11-12 14:22:00	25.222	32.3
2019-11-12 14:37:00	25.222	32.3
2019-11-12 14:52:00	25.125	32.3
2019-11-12 15:07:00	25.125	32.3
2019-11-12 15:22:00	25.222	32.3
2019-11-12 15:37:00	25.222	32.3
2019-11-12 15:52:00	25.222	32.3
2019-11-12 16:07:00	25.222	32.3
2019-11-12 16:22:00	25.222	32.3
2019-11-12 16:37:00	25.319	32.3
2019-11-12 16:52:00	25.319	32.3
2019-11-12 17:07:00	25.222	32.3
2019-11-12 17:22:00	25.222	32.3
2019-11-12 17:37:00	25.222	32.3
2019-11-12 17:52:00	25.222	32.3
2019-11-12 18:07:00	25.125	32.3
2019-11-12 18:22:00	24.835	32.3
2019-11-12 18:37:00	24.545	32.3
2019-11-12 18:52:00	24.255	32.3
2019-11-12 19:07:00	24.062	32.3
2019-11-12 19:22:00	23.966	32.3
2019-11-12 19:37:00	23.869	32.3
2019-11-12 19:52:00	23.773	32.3
2019-11-12 20:07:00	23.677	32.3
2019-11-12 20:22:00	23.677	32.3
2019-11-12 20:37:00	23.581	32.3
2019-11-12 20:52:00	23.484	32.3
2019-11-12 21:07:00	23.484	32.3
2019-11-12 21:22:00	23.484	32.3
2019-11-12 21:37:00	23.484	32.3
2019-11-12 21:52:00	23.484	32.3
2019-11-12 22:07:00	23.484	21.5
2019-11-12 22:22:00	23.484	32.3
2019-11-12 22:37:00	23.581	21.5
2019-11-12 22:52:00	23.677	32.3
2019-11-12 23:07:00	23.773	32.3
2019-11-12 23:22:00	23.869	32.3
2019-11-12 23:37:00	24.062	32.3
2019-11-12 23:52:00	24.158	32.3
2019-12-12 00:07:00	24.255	32.3
2019-12-12 00:22:00	24.351	32.3
2019-12-12 00:37:00	24.351	21.5
2019-12-12 00:52:00	24.351	32.3
2019-12-12 01:07:00	24.351	32.3
2019-12-12 01:22:00	24.351	32.3
2019-12-12 01:37:00	24.448	32.3
2019-12-12 01:52:00	24.448	32.3
2019-12-12 02:07:00	24.545	32.3
2019-12-12 02:22:00	24.545	32.3
2019-12-12 02:37:00	24.545	32.3
2019-12-12 02:52:00	24.641	32.3
2019-12-12 03:07:00	24.835	21.5
2019-12-12 03:22:00	24.835	32.3
2019-12-12 03:37:00	24.931	32.3
2019-12-12 03:52:00	24.931	32.3
2019-12-12 04:07:00	24.931	21.5
2019-12-12 04:22:00	24.931	32.3
2019-12-12 04:37:00	24.931	32.3
2019-12-12 04:52:00	24.931	32.3
2019-12-12 05:07:00	24.931	32.3
2019-12-12 05:22:00	24.835	32.3
2019-12-12 05:37:00	24.835	32.3
2019-12-12 05:52:00	24.835	32.3
2019-12-12 06:07:00	24.835	32.3
2019-12-12 06:22:00	24.931	32.3
2019-12-12 06:37:00	25.028	32.3
2019-12-12 06:52:00	25.125	32.3
2019-12-12 07:07:00	25.125	32.3
2019-12-12 07:22:00	25.125	32.3
2019-12-12 07:37:00	25.028	32.3
2019-12-12 07:52:00	24.931	32.3
2019-12-12 08:07:00	24.931	32.3
2019-12-12 08:22:00	24.931	32.3
2019-12-12 08:37:00	24.931	32.3
2019-12-12 08:52:00	24.931	32.3
2019-12-12 09:07:00	24.931	32.3
2019-12-12 09:22:00	24.931	32.3
2019-12-12 09:37:00	24.931	10.8
2019-12-12 09:52:00	24.931	10.8
2019-12-12 10:07:00	24.931	10.8
2019-12-12 10:22:00	24.931	10.8
2019-12-12 10:37:00	24.835	10.8
2019-12-12 10:52:00	24.835	10.8
2019-12-12 11:07:00	24.931	10.8
2019-12-12 11:22:00	25.028	21.5
2019-12-12 11:37:00	25.125	10.8
2019-12-12 11:52:00	25.222	10.8
2019-12-12 12:07:00	25.125	10.8
2019-12-12 12:22:00	25.125	10.8
2019-12-12 12:37:00	25.125	10.8
2019-12-12 12:52:00	25.125	10.8
2019-12-12 13:07:00	25.125	10.8
2019-12-12 13:22:00	25.125	10.8
2019-12-12 13:37:00	25.125	10.8
2019-12-12 13:52:00	25.028	10.8
2019-12-12 14:07:00	24.931	10.8
2019-12-12 14:22:00	24.835	10.8
2019-12-12 14:37:00	24.835	10.8
2019-12-12 14:52:00	24.835	10.8
2019-12-12 15:07:00	24.835	10.8
2019-12-12 15:22:00	24.835	10.8
2019-12-12 15:37:00	24.835	10.8
2019-12-12 15:52:00	24.835	10.8
2019-12-12 16:07:00	24.835	10.8
2019-12-12 16:22:00	24.835	10.8
2019-12-12 16:37:00	24.835	10.8
2019-12-12 16:52:00	24.835	10.8
2019-12-12 17:07:00	24.835	10.8
2019-12-12 17:22:00	24.835	10.8
2019-12-12 17:37:00	24.835	10.8
2019-12-12 17:52:00	24.835	10.8
2019-12-12 18:07:00	24.835	10.8
2019-12-12 18:22:00	24.835	10.8
2019-12-12 18:37:00	24.835	10.8
2019-12-12 18:52:00	24.835	10.8
2019-12-12 19:07:00	24.931	10.8
2019-12-12 19:22:00	24.835	10.8
2019-12-12 19:37:00	24.931	10.8
2019-12-12 19:52:00	24.835	10.8
2019-12-12 20:07:00	24.931	10.8
2019-12-12 20:22:00	24.931	10.8
2019-12-12 20:37:00	24.931	10.8
2019-12-12 20:52:00	24.931	10.8
2019-12-12 21:07:00	24.931	10.8
2019-12-12 21:22:00	24.931	10.8
2019-12-12 21:37:00	24.931	10.8
2019-12-12 21:52:00	24.931	10.8
2019-12-12 22:07:00	24.931	10.8
2019-12-12 22:22:00	24.931	10.8
2019-12-12 22:37:00	24.931	10.8
2019-12-12 22:52:00	24.931	10.8
2019-12-12 23:07:00	24.931	10.8
2019-12-12 23:22:00	25.028	10.8
2019-12-12 23:37:00	25.125	10.8
2019-12-12 23:52:00	25.222	10.8
12/13/2019 12:07:54 am	25.222	10.8
12/13/2019 12:22:54 am	25.125	10.8
12/13/2019 12:37:54 am	25.125	10.8
12/13/2019 12:52:54 am	25.125	10.8
12/13/2019 01:07:54 am	25.125	10.8
12/13/2019 01:22:54 am	25.125	10.8
12/13/2019 01:37:54 am	25.125	10.8
12/13/2019 01:52:54 am	25.028	10.8
12/13/2019 02:07:54 am	25.028	10.8
12/13/2019 02:22:54 am	24.931	10.8
12/13/2019 02:37:54 am	25.125	10.8
12/13/2019 02:52:54 am	25.125	10.8
12/13/2019 03:07:54 am	25.125	10.8
12/13/2019 03:22:54 am	25.125	10.8
12/13/2019 03:37:54 am	25.125	10.8
12/13/2019 03:52:54 am	25.028	10.8
12/13/2019 04:07:54 am	25.028	10.8
12/13/2019 04:22:54 am	25.028	10.8
12/13/2019 04:37:54 am	25.028	10.8
12/13/2019 04:52:54 am	24.931	10.8
12/13/2019 05:07:54 am	24.931	10.8
12/13/2019 05:22:54 am	24.931	10.8
12/13/2019 05:37:54 am	24.931	10.8
12/13/2019 05:52:54 am	25.028	10.8
12/13/2019 06:07:54 am	25.125	10.8
12/13/2019 06:22:54 am	25.222	10.8
12/13/2019 06:37:54 am	25.222	10.8
12/13/2019 06:52:54 am	25.222	10.8
12/13/2019 07:07:54 am	25.222	10.8
12/13/2019 07:22:54 am	25.222	10.8
12/13/2019 07:37:54 am	25.125	10.8
12/13/2019 07:52:54 am	25.125	10.8
12/13/2019 08:07:54 am	25.028	10.8
12/13/2019 08:22:54 am	25.028	10.8
12/13/2019 08:37:54 am	25.028	10.8
12/13/2019 08:52:54 am	25.028	10.8
12/13/2019 09:07:54 am	25.028	10.8
12/13/2019 09:22:54 am	25.028	10.8
12/13/2019 09:37:54 am	25.125	10.8
12/13/2019 09:52:54 am	25.222	10.8
12/13/2019 10:07:54 am	25.319	10.8
12/13/2019 10:22:54 am	25.319	10.8
12/13/2019 10:37:54 am	25.222	10.8
12/13/2019 10:52:54 am	25.222	10.8
12/13/2019 11:07:54 am	25.222	10.8
12/13/2019 11:22:54 am	25.125	10.8
12/13/2019 11:37:54 am	25.125	10.8
12/13/2019 11:52:54 am	25.125	10.8
12/13/2019 12:07:54 pm	25.125	10.8
12/13/2019 12:22:54 pm	25.028	10.8
12/13/2019 12:37:54 pm	25.125	10.8
12/13/2019 12:52:54 pm	25.222	10.8
12/13/2019 01:07:54 pm	25.222	10.8
12/13/2019 01:22:54 pm	25.222	10.8
12/13/2019 01:37:54 pm	25.319	10.8
12/13/2019 01:52:54 pm	25.319	10.8
12/13/2019 02:07:54 pm	25.319	10.8
12/13/2019 02:22:54 pm	25.222	10.8
12/13/2019 02:37:54 pm	25.222	10.8
12/13/2019 02:52:54 pm	25.222	10.8
12/13/2019 03:07:54 pm	25.125	10.8
12/13/2019 03:22:54 pm	25.125	10.8
12/13/2019 03:37:54 pm	25.125	10.8
12/13/2019 03:52:54 pm	25.125	10.8
12/13/2019 04:07:54 pm	25.125	10.8
12/13/2019 04:22:54 pm	25.125	10.8
12/13/2019 04:37:54 pm	25.125	10.8
12/13/2019 04:52:54 pm	25.125	10.8
12/13/2019 05:07:54 pm	25.125	10.8
12/13/2019 05:22:54 pm	25.125	10.8
12/13/2019 05:37:54 pm	25.125	10.8
12/13/2019 05:52:54 pm	25.125	10.8
12/13/2019 06:07:54 pm	25.125	10.8
12/13/2019 06:22:54 pm	25.125	10.8
12/13/2019 06:37:54 pm	25.125	10.8
12/13/2019 06:52:54 pm	25.125	10.8
12/13/2019 07:07:54 pm	25.125	10.8
12/13/2019 07:22:54 pm	25.125	10.8
12/13/2019 07:37:54 pm	25.125	10.8
12/13/2019 07:52:54 pm	25.125	10.8
12/13/2019 08:07:54 pm	25.125	10.8
12/13/2019 08:22:54 pm	25.125	10.8
12/13/2019 08:37:54 pm	25.125	10.8
12/13/2019 08:52:54 pm	25.125	10.8
12/13/2019 09:07:54 pm	25.125	10.8
12/13/2019 09:22:54 pm	25.125	10.8
12/13/2019 09:37:54 pm	25.125	10.8
12/13/2019 09:52:54 pm	25.125	10.8
12/13/2019 10:07:54 pm	25.125	10.8
12/13/2019 10:22:54 pm	25.125	10.8
12/13/2019 10:37:54 pm	25.125	10.8
12/13/2019 10:52:54 pm	25.125	10.8
12/13/2019 11:07:54 pm	25.125	10.8
12/13/2019 11:22:54 pm	25.125	10.8
12/13/2019 11:37:54 pm	25.125	10.8
12/13/2019 11:52:54 pm	25.125	10.8
12/14/2019 12:07:54 am	25.125	10.8
12/14/2019 12:22:54 am	25.125	10.8
12/14/2019 12:37:54 am	25.125	10.8
12/14/2019 12:52:54 am	25.125	10.8
12/14/2019 01:07:54 am	25.125	10.8
12/14/2019 01:22:54 am	25.125	10.8
12/14/2019 01:37:54 am	25.125	10.8
12/14/2019 01:52:54 am	25.125	10.8
12/14/2019 02:07:54 am	25.125	10.8
12/14/2019 02:22:54 am	25.125	10.8
12/14/2019 02:37:54 am	25.125	10.8
12/14/2019 02:52:54 am	25.125	10.8
12/14/2019 03:07:54 am	25.125	10.8
12/14/2019 03:22:54 am	25.125	10.8
12/14/2019 03:37:54 am	25.125	10.8
12/14/2019 03:52:54 am	25.125	10.8
12/14/2019 04:07:54 am	25.125	10.8
12/14/2019 04:22:54 am	25.125	10.8
12/14/2019 04:37:54 am	25.125	10.8
12/14/2019 04:52:54 am	25.125	10.8
12/14/2019 05:07:54 am	25.125	10.8
12/14/2019 05:22:54 am	25.125	10.8
12/14/2019 05:37:54 am	25.222	10.8
12/14/2019 05:52:54 am	25.222	10.8
12/14/2019 06:07:54 am	25.125	10.8
12/14/2019 06:22:54 am	25.125	10.8
12/14/2019 06:37:54 am	25.125	10.8
12/14/2019 06:52:54 am	25.125	10.8
12/14/2019 07:07:54 am	25.125	10.8
12/14/2019 07:22:54 am	25.028	10.8
12/14/2019 07:37:54 am	25.028	10.8
12/14/2019 07:52:54 am	25.125	10.8
12/14/2019 08:07:54 am	25.028	10.8
12/14/2019 08:22:54 am	25.125	10.8
12/14/2019 08:37:54 am	25.028	10.8
12/14/2019 08:52:54 am	25.028	10.8
12/14/2019 09:07:54 am	25.028	10.8
12/14/2019 09:22:54 am	25.028	10.8
12/14/2019 09:37:54 am	25.028	10.8
12/14/2019 09:52:54 am	25.125	10.8
12/14/2019 10:07:54 am	25.125	10.8
12/14/2019 10:22:54 am	25.125	10.8
12/14/2019 10:37:54 am	25.028	10.8
12/14/2019 10:52:54 am	25.028	10.8
12/14/2019 11:07:54 am	25.028	10.8
12/14/2019 11:22:54 am	25.028	10.8
12/14/2019 11:37:54 am	25.028	10.8
12/14/2019 11:52:54 am	25.028	10.8
12/14/2019 12:07:54 pm	25.028	10.8
12/14/2019 12:22:54 pm	25.028	10.8
12/14/2019 12:37:54 pm	25.028	10.8
12/14/2019 12:52:54 pm	25.028	10.8
12/14/2019 01:07:54 pm	24.931	10.8
12/14/2019 01:22:54 pm	25.028	10.8
12/14/2019 01:37:54 pm	24.931	10.8
12/14/2019 01:52:54 pm	24.931	10.8
12/14/2019 02:07:54 pm	24.931	10.8
12/14/2019 02:22:54 pm	24.931	10.8
12/14/2019 02:37:54 pm	24.931	10.8
12/14/2019 02:52:54 pm	24.931	10.8
12/14/2019 03:07:54 pm	24.931	10.8
12/14/2019 03:22:54 pm	24.931	10.8
12/14/2019 03:37:54 pm	24.931	10.8
12/14/2019 03:52:54 pm	24.931	10.8
12/14/2019 04:07:54 pm	24.931	10.8
12/14/2019 04:22:54 pm	24.931	10.8
12/14/2019 04:37:54 pm	24.931	10.8
12/14/2019 04:52:54 pm	24.931	10.8
12/14/2019 05:07:54 pm	24.931	10.8
12/14/2019 05:22:54 pm	24.931	10.8
12/14/2019 05:37:54 pm	24.931	10.8
12/14/2019 05:52:54 pm	24.931	10.8
12/14/2019 06:07:54 pm	24.931	10.8
12/14/2019 06:22:54 pm	24.931	10.8
12/14/2019 06:37:54 pm	24.931	10.8
12/14/2019 06:52:54 pm	24.931	10.8
12/14/2019 07:07:54 pm	24.931	10.8
12/14/2019 07:22:54 pm	24.931	10.8
12/14/2019 07:37:54 pm	24.931	10.8
12/14/2019 07:52:54 pm	24.931	10.8
12/14/2019 08:07:54 pm	24.931	10.8
12/14/2019 08:22:54 pm	25.028	10.8
12/14/2019 08:37:54 pm	24.931	10.8
12/14/2019 08:52:54 pm	24.931	10.8
12/14/2019 09:07:54 pm	25.028	10.8
12/14/2019 09:22:54 pm	25.028	10.8
12/14/2019 09:37:54 pm	25.028	10.8
12/14/2019 09:52:54 pm	25.028	10.8
12/14/2019 10:07:54 pm	25.028	10.8
12/14/2019 10:22:54 pm	24.931	10.8
12/14/2019 10:37:54 pm	24.931	10.8
12/14/2019 10:52:54 pm	24.931	10.8
12/14/2019 11:07:54 pm	24.931	10.8
12/14/2019 11:22:54 pm	24.931	10.8
12/14/2019 11:37:54 pm	24.931	10.8
12/14/2019 11:52:54 pm	24.931	10.8
12/15/2019 12:07:54 am	24.931	10.8
12/15/2019 12:22:54 am	24.931	10.8
12/15/2019 12:37:54 am	24.931	10.8
12/15/2019 12:52:54 am	24.931	10.8
12/15/2019 01:07:54 am	24.931	10.8
12/15/2019 01:22:54 am	24.931	10.8
12/15/2019 01:37:54 am	24.931	10.8
12/15/2019 01:52:54 am	24.931	10.8
12/15/2019 02:07:54 am	24.931	10.8
12/15/2019 02:22:54 am	24.931	10.8
12/15/2019 02:37:54 am	24.931	10.8
12/15/2019 02:52:54 am	24.931	10.8
12/15/2019 03:07:54 am	24.931	10.8
12/15/2019 03:22:54 am	24.931	10.8
12/15/2019 03:37:54 am	24.931	10.8
12/15/2019 03:52:54 am	24.931	10.8
12/15/2019 04:07:54 am	25.028	10.8
12/15/2019 04:22:54 am	25.028	10.8
12/15/2019 04:37:54 am	24.931	10.8
12/15/2019 04:52:54 am	25.028	10.8
12/15/2019 05:07:54 am	25.028	10.8
12/15/2019 05:22:54 am	24.931	10.8
12/15/2019 05:37:54 am	25.028	10.8
12/15/2019 05:52:54 am	25.028	10.8
12/15/2019 06:07:54 am	25.028	10.8
12/15/2019 06:22:54 am	25.028	10.8
12/15/2019 06:37:54 am	25.028	10.8
12/15/2019 06:52:54 am	25.028	10.8
12/15/2019 07:07:54 am	25.028	10.8
12/15/2019 07:22:54 am	25.028	10.8
12/15/2019 07:37:54 am	25.028	10.8
12/15/2019 07:52:54 am	25.028	10.8
12/15/2019 08:07:54 am	25.028	10.8
12/15/2019 08:22:54 am	25.028	10.8
12/15/2019 08:37:54 am	24.931	10.8
12/15/2019 08:52:54 am	25.028	10.8
12/15/2019 09:07:54 am	25.028	10.8
12/15/2019 09:22:54 am	25.028	10.8
12/15/2019 09:37:54 am	25.028	10.8
12/15/2019 09:52:54 am	25.028	10.8
12/15/2019 10:07:54 am	25.028	10.8
12/15/2019 10:22:54 am	25.028	10.8
12/15/2019 10:37:54 am	25.028	10.8
12/15/2019 10:52:54 am	25.028	10.8
12/15/2019 11:07:54 am	25.028	10.8
12/15/2019 11:22:54 am	25.028	10.8
12/15/2019 11:37:54 am	25.028	10.8
12/15/2019 11:52:54 am	25.028	10.8
12/15/2019 12:07:54 pm	24.931	10.8
12/15/2019 12:22:54 pm	24.931	10.8
12/15/2019 12:37:54 pm	24.931	10.8
12/15/2019 12:52:54 pm	24.931	10.8
12/15/2019 01:07:54 pm	24.931	10.8
12/15/2019 01:22:54 pm	24.931	10.8
12/15/2019 01:37:54 pm	24.931	10.8
12/15/2019 01:52:54 pm	24.931	10.8
12/15/2019 02:07:54 pm	24.931	10.8
12/15/2019 02:22:54 pm	24.931	10.8
12/15/2019 02:37:54 pm	24.931	10.8
12/15/2019 02:52:54 pm	24.931	10.8
12/15/2019 03:07:54 pm	24.931	10.8
12/15/2019 03:22:54 pm	24.931	10.8
12/15/2019 03:37:54 pm	24.931	10.8
12/15/2019 03:52:54 pm	24.931	10.8
12/15/2019 04:07:54 pm	24.931	10.8
12/15/2019 04:22:54 pm	24.931	10.8
12/15/2019 04:37:54 pm	24.931	10.8
12/15/2019 04:52:54 pm	24.931	10.8
12/15/2019 05:07:54 pm	24.931	10.8
12/15/2019 05:22:54 pm	24.835	10.8
12/15/2019 05:37:54 pm	24.931	10.8
12/15/2019 05:52:54 pm	24.931	10.8
12/15/2019 06:07:54 pm	24.931	10.8
12/15/2019 06:22:54 pm	24.931	10.8
12/15/2019 06:37:54 pm	24.931	10.8
12/15/2019 06:52:54 pm	24.931	10.8
12/15/2019 07:07:54 pm	24.835	10.8
12/15/2019 07:22:54 pm	24.931	10.8
12/15/2019 07:37:54 pm	24.931	10.8
12/15/2019 07:52:54 pm	24.931	10.8
12/15/2019 08:07:54 pm	24.931	10.8
12/15/2019 08:22:54 pm	24.931	10.8
12/15/2019 08:37:54 pm	24.931	10.8
12/15/2019 08:52:54 pm	24.931	10.8
12/15/2019 09:07:54 pm	24.931	10.8
12/15/2019 09:22:54 pm	24.931	10.8
12/15/2019 09:37:54 pm	24.931	10.8
12/15/2019 09:52:54 pm	24.931	10.8
12/15/2019 10:07:54 pm	24.931	10.8
12/15/2019 10:22:54 pm	24.931	10.8
12/15/2019 10:37:54 pm	24.931	10.8
12/15/2019 10:52:54 pm	24.931	10.8
12/15/2019 11:07:54 pm	24.931	10.8
12/15/2019 11:22:54 pm	24.931	10.8
12/15/2019 11:37:54 pm	24.931	10.8
12/15/2019 11:52:54 pm	24.931	10.8
12/16/2019 12:07:54 am	24.931	10.8
12/16/2019 12:22:54 am	24.931	10.8
12/16/2019 12:37:54 am	24.931	10.8
12/16/2019 12:52:54 am	24.931	10.8
12/16/2019 01:07:54 am	24.931	10.8
12/16/2019 01:22:54 am	24.931	10.8
12/16/2019 01:37:54 am	24.931	10.8
12/16/2019 01:52:54 am	24.931	10.8
12/16/2019 02:07:54 am	25.028	10.8
12/16/2019 02:22:54 am	24.931	10.8
12/16/2019 02:37:54 am	25.028	10.8
12/16/2019 02:52:54 am	25.028	10.8
12/16/2019 03:07:54 am	25.028	10.8
12/16/2019 03:22:54 am	25.028	10.8
12/16/2019 03:37:54 am	24.931	10.8
12/16/2019 03:52:54 am	24.931	10.8
12/16/2019 04:07:54 am	24.931	10.8
12/16/2019 04:22:54 am	25.028	10.8
12/16/2019 04:37:54 am	25.028	10.8
12/16/2019 04:52:54 am	25.028	10.8
12/16/2019 05:07:54 am	24.931	10.8
12/16/2019 05:22:54 am	24.931	10.8
12/16/2019 05:37:54 am	24.931	10.8
12/16/2019 05:52:54 am	24.931	10.8
12/16/2019 06:07:54 am	24.931	10.8
12/16/2019 06:22:54 am	24.931	10.8
12/16/2019 06:37:54 am	24.931	10.8
12/16/19 06:52:54 AM	24.835	10.8
12/16/19 07:07:54 AM	24.931	10.8
12/16/19 07:22:54 AM	24.931	10.8
12/16/19 07:37:54 AM	24.931	10.8
12/16/19 07:52:54 AM	24.931	10.8
12/16/19 08:07:54 AM	24.931	10.8
12/16/19 08:22:54 AM	24.931	10.8
12/16/19 08:37:54 AM	24.931	10.8
12/16/19 08:52:54 AM	24.931	10.8
12/16/19 09:07:54 AM	24.931	10.8
12/16/19 09:22:54 AM	24.931	10.8
12/16/19 09:37:54 AM	25.028	10.8
12/16/19 09:52:54 AM	25.028	10.8
12/16/19 10:07:54 AM	25.125	10.8
12/16/19 10:22:54 AM	25.125	10.8
12/16/19 10:37:54 AM	25.125	10.8
12/16/19 10:52:54 AM	25.125	10.8
12/16/19 11:07:54 AM	25.222	10.8
12/16/19 11:22:54 AM	25.222	10.8
12/16/19 11:37:54 AM	25.222	10.8
12/16/19 11:52:54 AM	25.125	10.8
12/16/19 12:07:54 PM	25.125	10.8
12/16/19 12:22:54 PM	25.125	10.8
12/16/19 12:37:54 PM	25.125	10.8
12/16/19 12:52:54 PM	25.125	10.8
12/16/19 01:07:54 PM	25.125	10.8
12/16/19 01:22:54 PM	25.125	10.8
12/16/19 01:37:54 PM	25.125	10.8
12/16/19 01:52:54 PM	25.125	10.8
12/16/19 02:07:54 PM	25.125	10.8
12/16/19 02:22:54 PM	25.125	10.8
12/16/19 02:37:54 PM	25.125	10.8
12/16/19 02:52:54 PM	25.125	10.8
12/16/19 03:07:54 PM	25.028	10.8
12/16/19 03:22:54 PM	25.125	10.8
12/16/19 03:37:54 PM	25.125	10.8
12/16/19 03:52:54 PM	25.028	10.8
12/16/19 04:07:54 PM	25.028	10.8
12/16/19 04:22:54 PM	25.125	10.8
12/16/19 04:37:54 PM	25.125	10.8
12/16/19 04:52:54 PM	25.125	10.8
12/16/19 05:07:54 PM	25.028	10.8
12/16/19 05:22:54 PM	25.125	10.8
12/16/19 05:37:54 PM	25.125	10.8
12/16/19 05:52:54 PM	25.125	10.8
12/16/19 06:07:54 PM	25.125	10.8
12/16/19 06:22:54 PM	25.125	10.8
12/16/19 06:37:54 PM	25.125	10.8
12/16/19 06:52:54 PM	25.125	10.8
12/16/19 07:07:54 PM	25.125	10.8
12/16/19 07:22:54 PM	25.125	10.8
12/16/19 07:37:54 PM	25.125	10.8
12/16/19 07:52:54 PM	25.125	10.8
12/16/19 08:07:54 PM	25.125	10.8
12/16/19 08:22:54 PM	25.125	10.8
12/16/19 08:37:54 PM	25.125	10.8
12/16/19 08:52:54 PM	25.125	10.8
12/16/19 09:07:54 PM	25.125	10.8
12/16/19 09:22:54 PM	25.125	10.8
12/16/19 09:37:54 PM	25.125	10.8
12/16/19 09:52:54 PM	25.125	10.8
12/16/19 10:07:54 PM	25.125	10.8
12/16/19 10:22:54 PM	25.125	10.8
12/16/19 10:37:54 PM	25.125	10.8
12/16/19 10:52:54 PM	25.222	10.8
12/16/19 11:07:54 PM	25.222	10.8
12/16/19 11:22:54 PM	25.125	10.8
12/16/19 11:37:54 PM	25.125	10.8
12/16/19 11:52:54 PM	25.125	10.8
12/17/19 12:07:54 AM	25.125	10.8
12/17/19 12:22:54 AM	25.125	10.8
12/17/19 12:37:54 AM	25.125	10.8
12/17/19 12:52:54 AM	25.222	10.8
12/17/19 01:07:54 AM	25.125	10.8
12/17/19 01:22:54 AM	25.125	10.8
12/17/19 01:37:54 AM	25.125	10.8
12/17/19 01:52:54 AM	25.125	10.8
12/17/19 02:07:54 AM	25.125	10.8
12/17/19 02:22:54 AM	25.125	10.8
12/17/19 02:37:54 AM	25.125	10.8
12/17/19 02:52:54 AM	25.125	10.8
12/17/19 03:07:54 AM	25.125	10.8
12/17/19 03:22:54 AM	25.125	10.8
12/17/19 03:37:54 AM	25.125	10.8
12/17/19 03:52:54 AM	25.125	10.8
12/17/19 04:07:54 AM	25.125	10.8
12/17/19 04:22:54 AM	25.125	10.8
12/17/19 04:37:54 AM	25.125	10.8
12/17/19 04:52:54 AM	25.125	10.8
12/17/19 05:07:54 AM	25.125	10.8
12/17/19 05:22:54 AM	25.125	10.8
12/17/19 05:37:54 AM	25.125	10.8
12/17/19 05:52:54 AM	25.125	10.8
12/17/19 06:07:54 AM	25.125	10.8
12/17/19 06:22:54 AM	25.125	10.8
12/17/19 06:37:54 AM	25.125	10.8
12/17/19 06:52:54 AM	25.125	10.8
12/17/19 07:07:54 AM	25.125	10.8
12/17/19 07:22:54 AM	25.125	10.8
12/17/19 07:37:54 AM	25.125	10.8
12/17/19 07:52:54 AM	25.125	10.8
12/17/19 08:07:54 AM	25.125	10.8
12/17/19 08:22:54 AM	25.028	10.8
12/17/19 08:37:54 AM	25.028	10.8
12/17/19 08:52:54 AM	25.125	10.8
12/17/19 09:07:54 AM	25.125	10.8
12/17/19 09:22:54 AM	25.125	10.8
12/17/19 09:37:54 AM	25.125	10.8
12/17/19 09:52:54 AM	25.028	10.8
12/17/19 10:07:54 AM	25.028	10.8
12/17/19 10:22:54 AM	24.931	10.8
12/17/19 10:37:54 AM	25.028	10.8
12/17/19 10:52:54 AM	25.028	10.8
12/17/19 11:07:54 AM	24.931	10.8
12/17/19 11:22:54 AM	24.931	10.8
12/17/19 11:37:54 AM	24.931	10.8
12/17/19 11:52:54 AM	24.931	10.8
12/17/19 12:07:54 PM	24.931	10.8
12/17/19 12:22:54 PM	24.931	10.8
12/17/19 12:37:54 PM	24.931	10.8
12/17/19 12:52:54 PM	24.931	10.8
12/17/19 01:07:54 PM	24.931	10.8
12/17/19 01:22:54 PM	24.931	10.8
12/17/19 01:37:54 PM	24.931	10.8
12/17/19 01:52:54 PM	24.931	10.8
12/17/19 02:07:54 PM	24.931	10.8
12/17/19 02:22:54 PM	24.931	10.8
12/17/19 02:37:54 PM	24.931	10.8
12/17/19 02:52:54 PM	24.931	10.8
12/17/19 03:07:54 PM	24.931	10.8
12/17/19 03:22:54 PM	24.931	10.8
12/17/19 03:37:54 PM	24.931	10.8
12/17/19 03:52:54 PM	24.931	10.8
12/17/19 04:07:54 PM	25.028	10.8
12/17/19 04:22:54 PM	25.028	10.8
12/17/19 04:37:54 PM	25.028	10.8
12/17/19 04:52:54 PM	25.028	10.8
12/17/19 05:07:54 PM	25.028	10.8
12/17/19 05:22:54 PM	25.028	10.8
12/17/19 05:37:54 PM	25.028	10.8
12/17/19 05:52:54 PM	25.028	10.8
12/17/19 06:07:54 PM	25.028	10.8
12/17/19 06:22:54 PM	25.028	10.8
12/17/19 06:37:54 PM	25.028	10.8
12/17/19 06:52:54 PM	25.028	10.8
12/17/19 07:07:54 PM	25.028	10.8
12/17/19 07:22:54 PM	25.028	10.8
12/17/19 07:37:54 PM	25.028	10.8
12/17/19 07:52:54 PM	25.028	10.8
12/17/19 08:07:54 PM	25.125	10.8
12/17/19 08:22:54 PM	25.125	10.8
12/17/19 08:37:54 PM	25.125	10.8
12/17/19 08:52:54 PM	25.125	10.8
12/17/19 09:07:54 PM	25.125	10.8
12/17/19 09:22:54 PM	25.125	10.8
12/17/19 09:37:54 PM	25.125	10.8
12/17/19 09:52:54 PM	25.125	10.8
12/17/19 10:07:54 PM	25.125	10.8
12/17/19 10:22:54 PM	25.125	10.8
12/17/19 10:37:54 PM	25.125	10.8
12/17/19 10:52:54 PM	25.125	10.8
12/17/19 11:07:54 PM	25.125	10.8
12/17/19 11:22:54 PM	25.125	10.8
12/17/19 11:37:54 PM	25.125	10.8
12/17/19 11:52:54 PM	25.125	10.8
12/18/19 12:07:54 AM	25.125	10.8
12/18/19 12:22:54 AM	25.125	10.8
12/18/19 12:37:54 AM	25.125	10.8
12/18/19 12:52:54 AM	25.125	10.8
12/18/19 01:07:54 AM	25.125	10.8
12/18/19 01:22:54 AM	25.125	10.8
12/18/19 01:37:54 AM	25.125	10.8
12/18/19 01:52:54 AM	25.125	10.8
12/18/19 02:07:54 AM	25.125	10.8
12/18/19 02:22:54 AM	25.125	10.8
12/18/19 02:37:54 AM	25.125	10.8
12/18/19 02:52:54 AM	25.125	10.8
12/18/19 03:07:54 AM	25.125	10.8
12/18/19 03:22:54 AM	25.125	10.8
12/18/19 03:37:54 AM	25.125	10.8
12/18/19 03:52:54 AM	25.125	10.8
12/18/19 04:07:54 AM	25.125	10.8
12/18/19 04:22:54 AM	25.125	10.8
12/18/19 04:37:54 AM	25.125	10.8
12/18/19 04:52:54 AM	25.125	10.8
12/18/19 05:07:54 AM	25.125	10.8
12/18/19 05:22:54 AM	25.125	10.8
12/18/19 05:37:54 AM	25.125	10.8
12/18/19 05:52:54 AM	25.125	10.8
12/18/19 06:07:54 AM	25.125	10.8
12/18/19 06:22:54 AM	25.125	10.8
12/18/19 06:37:54 AM	25.125	10.8
12/18/19 06:52:54 AM	25.125	10.8
12/18/19 07:07:54 AM	25.125	10.8
12/18/19 07:22:54 AM	25.125	10.8
12/18/19 07:37:54 AM	25.028	10.8
12/18/19 07:52:54 AM	25.028	10.8
12/18/19 08:07:54 AM	25.028	10.8
12/18/19 08:22:54 AM	25.028	10.8
12/18/19 08:37:54 AM	25.028	10.8
12/18/19 08:52:54 AM	25.028	10.8
12/18/19 09:07:54 AM	25.028	21.5
12/18/19 09:22:54 AM	25.125	32.3
12/18/19 09:37:54 AM	25.222	32.3
12/18/19 09:52:54 AM	25.222	32.3
12/18/19 10:07:54 AM	25.319	32.3
12/18/19 10:22:54 AM	25.319	32.3
12/18/19 10:37:54 AM	25.319	32.3
12/18/19 10:52:54 AM	25.222	32.3
12/18/19 11:07:54 AM	25.222	32.3
12/18/19 11:22:54 AM	25.319	32.3
12/18/19 11:37:54 AM	25.222	32.3
12/18/19 11:52:54 AM	25.222	32.3
12/18/19 12:07:54 PM	25.222	32.3
12/18/19 12:22:54 PM	25.222	32.3
12/18/19 12:37:54 PM	25.222	32.3
12/18/19 12:52:54 PM	25.222	32.3
12/18/19 01:07:54 PM	25.222	32.3
12/18/19 01:22:54 PM	25.222	32.3
12/18/19 01:37:54 PM	25.222	32.3
12/18/19 01:52:54 PM	25.222	32.3
12/18/19 02:07:54 PM	25.222	32.3
12/18/19 02:22:54 PM	25.222	32.3
12/18/19 02:37:54 PM	25.319	32.3
12/18/19 02:52:54 PM	25.319	32.3
12/18/19 03:07:54 PM	25.319	32.3
12/18/19 03:22:54 PM	25.416	32.3
12/18/19 03:37:54 PM	25.416	32.3
12/18/19 03:52:54 PM	25.319	32.3
12/18/19 04:07:54 PM	25.319	32.3
12/18/19 04:22:54 PM	25.319	32.3
12/18/19 04:37:54 PM	25.319	10.8
12/18/19 04:52:54 PM	25.319	10.8
12/18/19 05:07:54 PM	25.416	10.8
12/18/19 05:22:54 PM	25.222	10.8
12/18/19 05:37:54 PM	25.222	10.8
12/18/19 05:52:54 PM	25.222	10.8
12/18/19 06:07:54 PM	25.222	10.8
12/18/19 06:22:54 PM	25.222	10.8
12/18/19 06:37:54 PM	25.222	10.8
12/18/19 06:52:54 PM	25.222	10.8
12/18/19 07:07:54 PM	25.222	10.8
12/18/19 07:22:54 PM	25.222	10.8
12/18/19 07:37:54 PM	25.222	10.8
12/18/19 07:52:54 PM	25.222	10.8
12/18/19 08:07:54 PM	25.222	10.8
12/18/19 08:22:54 PM	25.222	10.8
12/18/19 08:37:54 PM	25.222	10.8
12/18/19 08:52:54 PM	25.222	10.8
12/18/19 09:07:54 PM	25.222	10.8
12/18/19 09:22:54 PM	25.222	10.8
12/18/19 09:37:54 PM	25.222	10.8
12/18/19 09:52:54 PM	25.222	10.8
12/18/19 10:07:54 PM	25.222	10.8
12/18/19 10:22:54 PM	25.222	10.8
12/18/19 10:37:54 PM	25.222	10.8
12/18/19 10:52:54 PM	25.222	10.8
12/18/19 11:07:54 PM	25.222	10.8
12/18/19 11:22:54 PM	25.222	10.8
12/18/19 11:37:54 PM	25.222	10.8
12/18/19 11:52:54 PM	25.222	10.8
12/19/19 12:07:54 AM	25.222	10.8
12/19/19 12:22:54 AM	25.222	10.8
12/19/19 12:37:54 AM	25.319	10.8
12/19/19 12:52:54 AM	25.222	10.8
12/19/19 01:07:54 AM	25.222	10.8
12/19/19 01:22:54 AM	25.319	10.8
12/19/19 01:37:54 AM	25.319	10.8
12/19/19 01:52:54 AM	25.319	10.8
12/19/19 02:07:54 AM	25.319	10.8
12/19/19 02:22:54 AM	25.319	10.8
12/19/19 02:37:54 AM	25.319	10.8
12/19/19 02:52:54 AM	25.222	10.8
12/19/19 03:07:54 AM	25.222	10.8
12/19/19 03:22:54 AM	25.222	10.8
12/19/19 03:37:54 AM	25.222	10.8
12/19/19 03:52:54 AM	25.222	10.8
12/19/19 04:07:54 AM	25.222	10.8
12/19/19 04:22:54 AM	25.222	10.8
12/19/19 04:37:54 AM	25.222	10.8
12/19/19 04:52:54 AM	25.125	10.8
12/19/19 05:07:54 AM	25.222	10.8
12/19/19 05:22:54 AM	25.222	10.8
12/19/19 05:37:54 AM	25.222	10.8
12/19/19 05:52:54 AM	25.222	10.8
12/19/19 06:07:54 AM	25.125	10.8
12/19/19 06:22:54 AM	25.125	10.8
12/19/19 06:37:54 AM	25.125	10.8
12/19/19 06:52:54 AM	25.125	10.8
12/19/19 07:07:54 AM	25.125	10.8
12/19/19 07:22:54 AM	25.125	10.8
12/19/19 07:37:54 AM	25.125	10.8
12/19/19 07:52:54 AM	25.125	10.8
12/19/19 08:07:54 AM	25.125	10.8
12/19/19 08:22:54 AM	25.028	10.8
12/19/19 08:37:54 AM	25.125	10.8
12/19/19 08:52:54 AM	25.125	10.8
12/19/19 09:07:54 AM	25.125	10.8
12/19/19 09:22:54 AM	25.222	10.8
12/19/19 09:37:54 AM	25.222	10.8
12/19/19 09:52:54 AM	25.125	10.8
12/19/19 10:07:54 AM	25.125	10.8
12/19/19 10:22:54 AM	25.125	10.8
12/19/19 10:37:54 AM	25.125	10.8
12/19/19 10:52:54 AM	25.125	10.8
12/19/19 11:07:54 AM	25.125	10.8
12/19/19 11:22:54 AM	25.125	10.8
12/19/19 11:37:54 AM	25.222	10.8
12/19/19 11:52:54 AM	25.222	10.8
12/19/19 12:07:54 PM	25.125	10.8
12/19/19 12:22:54 PM	25.125	10.8
12/19/19 12:37:54 PM	25.028	10.8
12/19/19 12:52:54 PM	25.028	10.8
12/19/19 01:07:54 PM	25.125	10.8
12/19/19 01:22:54 PM	25.125	10.8
12/19/19 01:37:54 PM	25.028	10.8
12/19/19 01:52:54 PM	25.125	10.8
12/19/19 02:07:54 PM	25.028	10.8
12/19/19 02:22:54 PM	25.028	10.8
12/19/19 02:37:54 PM	25.028	10.8
12/19/19 02:52:54 PM	25.125	10.8
12/19/19 03:07:54 PM	25.125	21.5
12/19/19 03:22:54 PM	25.125	21.5
12/19/19 03:37:54 PM	25.125	10.8
12/19/19 03:52:54 PM	25.125	10.8
12/19/19 04:07:54 PM	25.125	10.8
12/19/19 04:22:54 PM	25.028	10.8
12/19/19 04:37:54 PM	25.028	10.8
12/19/19 04:52:54 PM	24.931	10.8
12/19/19 05:07:54 PM	24.931	10.8
12/19/19 05:22:54 PM	24.931	10.8
12/19/19 05:37:54 PM	24.931	10.8
12/19/19 05:52:54 PM	24.931	10.8
12/19/19 06:07:54 PM	24.931	10.8
12/19/19 06:22:54 PM	24.931	10.8
12/19/19 06:37:54 PM	24.931	10.8
12/19/19 06:52:54 PM	25.028	10.8
12/19/19 07:07:54 PM	25.028	10.8
12/19/19 07:22:54 PM	25.028	10.8
12/19/19 07:37:54 PM	25.028	10.8
12/19/19 07:52:54 PM	25.125	10.8

## Sheet: Video_d1
SC	Replicat
	1	2	3	4	5	6	7	8
Av. Speed (mm/s)	24.8413	0.0691039	27.6531	23.3367	5.35916	16.3101	8.9781	2.59597
Mob. Av. Speed (mm/s)	25.2638	1.61624	28.6077	26.2606	10.2145	17.628	9.62373	4.81841
Av. Accel (mm/s^2)	44.7105	0.489188	44.4563	35.7822	12.7502	28.6526	15.1569	6.59463
Mobility Rate (%)	0.982696	0.00546958	0.965262	0.886364	0.515727	0.920727	0.929162	0.509072
Visible Frames	7401	7500	7287	7440	7475	7270	7500	7500
Visible Time (m:s)	0:04:56.040000	0:05:00	0:04:51.480000	0:04:57.600000	0:04:59	0:04:50.800000	0:05:00	0:05:00
Invisible Frames	99	0	213	60	25	230	0	0
Invisible Time (m:s)	0:00:03.960000	0:00:00	0:00:08.520000	0:00:02.400000	0:00:01	0:00:09.200000	0:00:00	0:00:00
First Visible Frame	7500	7500	7500	7500	7500	7500	7500	7500
Last Visible Frame	14999	14999	14999	14999	14999	14999	14999	14999
Visibility Rate (%)	0.9868	1	0.9716	0.992	0.996667	0.969333	1	1
Invisibility Rate (%)	0.0132	0	0.0284	0.008	0.00333333	0.0306667	0	0
Explored Areas	4	1	4	4	4	4	4	4
Number of Areas	4	9	9	9	4	9	6	9
Exploration Rate (%)	1	0.111111	0.444444	0.444444	1	0.444444	0.666667	0.444444
Total Distance (mm)	7477.54	28.7598	8340.19	7035.03	1645.01	4948.58	2751.1	804.576
Transitions In	0	0	0	0	0	0	0	0
Transitions Out	0	0	0	0	0	0	0	0
Frozen Events	0	1	1	3	13	1	1	12
Tot. Time Frozen (m:s)	0:00:00	0:04:59.960000	0:00:10.560000	0:00:25.040000	0:02:51.560000	0:00:08.440000	0:00:04.360000	0:02:52.320000
Avg. Time Frozen (m:s)	0:00:00	0:04:59.960000	0:00:10.560000	0:00:08.347000	0:00:13.197000	0:00:08.440000	0:00:04.360000	0:00:14.360000
NC	Replicat
	1	2	3	4	5	6	7	8
Av. Speed (mm/s)	9.19859	2.00615	1.28935	0.319649	9.77979	6.72802	1.81789	0.6356
Mob. Av. Speed (mm/s)	14.282	5.23411	2.39506	2.20888	14.3694	7.96937	6.12173	2.66336
Av. Accel (mm/s^2)	15.7069	3.92728	5.57898	1.65793	19.0916	16.1637	4.71738	3.30339
Mobility Rate (%)	0.621288	0.357257	0.455843	0.082444	0.670587	0.831348	0.279616	0.184632
Visible Frames	7210	7500	7500	7500	7402	7392	7500	7500
Visible Time (m:s)	0:04:48.400000	0:05:00	0:05:00	0:05:00	0:04:56.080000	0:04:55.680000	0:05:00	0:05:00
Invisible Frames	290	0	0	0	98	108	0	0
Invisible Time (m:s)	0:00:11.600000	0:00:00	0:00:00	0:00:00	0:00:03.920000	0:00:04.320000	0:00:00	0:00:00
First Visible Frame	7500	7500	7500	7500	7500	7500	7500	7500
Last Visible Frame	14999	14999	14999	14999	14999	14999	14999	14999
Visibility Rate (%)	0.961333	1	1	1	0.986933	0.9856	1	1
Invisibility Rate (%)	0.0386667	0	0	0	0.0130667	0.0144	0	0
Explored Areas	5	4	4	1	4	4	4	2
Number of Areas	9	9	9	9	4	6	9	6
Exploration Rate (%)	0.555556	0.444444	0.444444	0.111111	1	0.666667	0.444444	0.333333
Total Distance (mm)	2793.34	621.502	447.241	115.773	2961.86	2071.98	570.289	216.811
Transitions In	0	0	0	0	0	0	0	0
Transitions Out	0	0	0	0	0	0	0	0
Frozen Events	11	13	19	3	12	5	7	6
Tot. Time Frozen (m:s)	0:01:50.560000	0:03:37.760000	0:03:38.680000	0:04:52.680000	0:01:45.400000	0:00:28.360000	0:03:57.280000	0:04:35.880000
Avg. Time Frozen (m:s)	0:00:10.051000	0:00:16.751000	0:00:11.509000	0:01:37.560000	0:00:08.783000	0:00:05.672000	0:00:33.897000	0:00:45.980000
PC	Replicat
	1	2	3	4	5	6	7	8
Av. Speed (mm/s)	0.636367		0.615167		1.01132
Mob. Av. Speed (mm/s)	2.02608		5.321		2.89204
Av. Accel (mm/s^2)	3.40277		3.79699		4.01385
Mobility Rate (%)	0.209445		0.0788421		0.27428
Visible Frames	7500		7500		7500
Visible Time (m:s)	0:05:00		0:05:00		0:05:00
Invisible Frames	0		0		0
Invisible Time (m:s)	0:00:00		0:00:00		0:00:00
First Visible Frame	7500		7500		7500
Last Visible Frame	14999		14999		14999
Visibility Rate (%)	1		1		1
Invisibility Rate (%)	0		0		0
Explored Areas	2		3		3
Number of Areas	4		9		9
Exploration Rate (%)	0.5		0.333333		0.333333
Total Distance (mm)	237.622		215.876		335.792
Transitions In	0		0		0
Transitions Out	0		0		0
Frozen Events	3		5		11
Tot. Time Frozen (m:s)	0:04:48.080000		0:04:47.920000		0:04:28.200000
Avg. Time Frozen (m:s)	0:01:36.027000		0:00:57.584000		0:00:24.382000
0.4 g/L	Replicat
	1	2	3	4	5	6	7	8
Av. Speed (mm/s)	26.501	0.250207	1.44878	15.4205	46.2773	3.2502	3.3078	20.2759
Mob. Av. Speed (mm/s)	30.7722	1.396	3.91161	16.4086	47.1185	8.97064	4.88995	21.8004
Av. Accel (mm/s^2)	45.3205	1.63299	4.79232	25.8944	38.1421	9.11845	7.94461	27.4263
Mobility Rate (%)	0.859304	0.117796	0.332978	0.937013	0.981532	0.344851	0.655149	0.928772
Visible Frames	7474	7500	7500	7323	7314	7500	7500	7473
Visible Time (m:s)	0:04:58.960000	0:05:00	0:05:00	0:04:52.920000	0:04:52.560000	0:05:00	0:05:00	0:04:58.920000
Invisible Frames	26	0	0	177	186	0	0	27
Invisible Time (m:s)	0:00:01.040000	0:00:00	0:00:00	0:00:07.080000	0:00:07.440000	0:00:00	0:00:00	0:00:01.080000
First Visible Frame	7500	7500	7500	7500	7500	7500	7500	7500
Last Visible Frame	14999	14999	14999	14999	14999	14999	14999	14999
Visibility Rate (%)	0.996533	1	1	0.9764	0.9752	1	1	0.9964
Invisibility Rate (%)	0.00346667	0	0	0.0236	0.0248	0	0	0.0036
Explored Areas	6	2	2	4	4	4	6	4
Number of Areas	9	6	9	6	9	6	9	9
Exploration Rate (%)	0.666667	0.333333	0.222222	0.666667	0.444444	0.666667	0.666667	0.444444
Total Distance (mm)	7994.83	103.009	488.165	4666.36	13954	1002.21	1038.31	6106.75
Transitions In	0	0	0	0	0	0	0	0
Transitions Out	0	0	0	0	0	0	0	0
Frozen Events	4	3	9	0	1	16	9	3
Tot. Time Frozen (m:s)	0:00:29.880000	0:04:59.880000	0:03:51.480000	0:00:00	0:00:04.720000	0:03:27.800000	0:01:53.520000	0:00:14.240000
Avg. Time Frozen (m:s)	0:00:07.470000	0:01:39.960000	0:00:25.720000	0:00:00	0:00:04.720000	0:00:12.987000	0:00:12.613000	0:00:04.747000
1 g/L	Replicat
	1	2	3	4	5	6	7	8
Av. Speed (mm/s)	10.1344	12.0677	7.0326	0.181688	2.35211	2.21056	9.11061	10.9698
Mob. Av. Speed (mm/s)	12.1114	12.7169	9.6957	1.64149	5.98879	4.66766	12.4569	16.1459
Av. Accel (mm/s^2)	14.0641	24.5754	16.4846	1.13944	4.82504	6.67257	23.8899	21.1851
Mobility Rate (%)	0.833244	0.946376	0.71323	0.0176094	0.377001	0.44317	0.724253	0.672201
Visible Frames	7500	7426	7449	7500	7500	7500	7500	7472
Visible Time (m:s)	0:05:00	0:04:57.040000	0:04:57.960000	0:05:00	0:05:00	0:05:00	0:05:00	0:04:58.880000
Invisible Frames	0	74	51	0	0	0	0	28
Invisible Time (m:s)	0:00:00	0:00:02.960000	0:00:02.040000	0:00:00	0:00:00	0:00:00	0:00:00	0:00:01.120000
First Visible Frame	7500	7500	7500	7500	7500	7500	7500	7500
Last Visible Frame	14999	14999	14999	14999	14999	14999	14999	14999
Visibility Rate (%)	1	0.990133	0.9932	1	1	1	1	0.996267
Invisibility Rate (%)	0	0.00986667	0.0068	0	0	0	0	0.00373333
Explored Areas	4	4	4	1	4	4	6	4
Number of Areas	4	9	9	9	6	9	9	9
Exploration Rate (%)	1	0.444444	0.444444	0.111111	0.666667	0.444444	0.666667	0.444444
Total Distance (mm)	3057.34	3660.67	2154.83	72.5314	723.103	705.185	2796.62	3322.78
Transitions In	0	0	0	0	0	0	0	0
Transitions Out	0	0	0	0	0	0	0	0
Frozen Events	9	2	8	1	7	12	10	11
Tot. Time Frozen (m:s)	0:00:58.320000	0:00:08.160000	0:01:06.600000	0:04:59.960000	0:03:11	0:03:10.800000	0:01:10.280000	0:01:51.640000
Avg. Time Frozen (m:s)	0:00:06.480000	0:00:04.080000	0:00:08.325000	0:04:59.960000	0:00:27.286000	0:00:15.900000	0:00:07.028000	0:00:10.149000
2.5 g/L	Replicat
	1	2	3	4	5	6	7	8
Av. Speed (mm/s)	3.32417	32.1001	0.839783	0.174685	4.76124	19.6831	2.67576	11.2094
Mob. Av. Speed (mm/s)	5.12694	33.0403	2.66627	1.86653	6.10527	20.706	4.77005	14.0317
Av. Accel (mm/s^2)	7.39482	35.7852	3.54603	1.05765	11.6424	33.1765	6.78056	22.7225
Mobility Rate (%)	0.630203	0.970882	0.275347	0.0316169	0.768324	0.949025	0.523212	0.785734
Visible Frames	7500	7422	7500	7500	7467	7439	7500	7196
Visible Time (m:s)	0:05:00	0:04:56.880000	0:05:00	0:05:00	0:04:58.680000	0:04:57.560000	0:05:00	0:04:47.840000
Invisible Frames	0	78	0	0	33	61	0	304
Invisible Time (m:s)	0:00:00	0:00:03.120000	0:00:00	0:00:00	0:00:01.320000	0:00:02.440000	0:00:00	0:00:12.160000
First Visible Frame	7500	7500	7500	7500	7500	7500	7500	7500
Last Visible Frame	14999	14999	14999	14999	14999	14999	14999	14999
Visibility Rate (%)	1	0.9896	1	1	0.9956	0.991867	1	0.959467
Invisibility Rate (%)	0	0.0104	0	0	0.0044	0.00813333	0	0.0405333
Explored Areas	4	4	4	1	4	4	4	4
Number of Areas	9	6	9	9	6	9	9	9
Exploration Rate (%)	0.444444	0.666667	0.444444	0.111111	0.666667	0.444444	0.444444	0.444444
Total Distance (mm)	1040.68	9663.12	285.854	66.0599	1453.56	5929.38	851.128	3398.08
Transitions In	0	0	0	0	0	0	0	0
Transitions Out	0	0	0	0	0	0	0	0
Frozen Events	10	1	6	3	7	0	12	6
Tot. Time Frozen (m:s)	0:02:01.360000	0:00:04.840000	0:04:14.920000	0:04:59.880000	0:00:48.320000	0:00:00	0:02:38.040000	0:00:54.880000
Avg. Time Frozen (m:s)	0:00:12.136000	0:00:04.840000	0:00:42.487000	0:01:39.960000	0:00:06.903000	0:00:00	0:00:13.170000	0:00:09.147000
6.25 g/L	Replicat
	1	2	3	4	5	6	7	8
Av. Speed (mm/s)	1.80794	18.5226	14.2252	0.204678	7.22669	7.78552	1.91518	12.5944
Mob. Av. Speed (mm/s)	4.1179	19.9126	16.6792	1.81491	11.396	9.9739	3.45069	19.9487
Av. Accel (mm/s^2)	4.90291	31.0492	17.9064	1.13522	11.6322	14.9652	5.53456	17.8383
Mobility Rate (%)	0.405283	0.926374	0.848627	0.036286	0.623433	0.77468	0.520278	0.623059
Visible Frames	7500	7284	7469	7500	7421	7500	7500	7411
Visible Time (m:s)	0:05:00	0:04:51.360000	0:04:58.760000	0:05:00	0:04:56.840000	0:05:00	0:05:00	0:04:56.440000
Invisible Frames	0	216	31	0	79	0	0	89
Invisible Time (m:s)	0:00:00	0:00:08.640000	0:00:01.240000	0:00:00	0:00:03.160000	0:00:00	0:00:00	0:00:03.560000
First Visible Frame	7500	7500	7500	7500	7500	7500	7500	7500
Last Visible Frame	14999	14999	14999	14999	14999	14999	14999	14999
Visibility Rate (%)	1	0.9712	0.995867	1	0.989467	1	1	0.988133
Invisibility Rate (%)	0	0.0288	0.00413333	0	0.0105333	0	0	0.0118667
Explored Areas	4	4	4	1	4	4	4	4
Number of Areas	6	9	9	9	4	9	9	9
Exploration Rate (%)	0.666667	0.444444	0.444444	0.111111	1	0.444444	0.444444	0.444444
Total Distance (mm)	570.331	5583.95	4312.31	80.3144	2187.28	2370.11	626.149	3806.79
Transitions In	0	0	0	0	0	0	0	0
Transitions Out	0	0	0	0	0	0	0	0
Frozen Events	12	1	4	2	11	8	7	8
Tot. Time Frozen (m:s)	0:03:20.880000	0:00:03.920000	0:00:50.680000	0:04:58.280000	0:01:41.680000	0:01:14.360000	0:02:33.680000	0:02:10.040000
Avg. Time Frozen (m:s)	0:00:16.740000	0:00:03.920000	0:00:12.670000	0:02:29.140000	0:00:09.244000	0:00:09.295000	0:00:21.954000	0:00:16.255000
15.6 g/L	Replicat
	1	2	3	4	5	6	7	8
Av. Speed (mm/s)	0.254369	6.71103	11.7335	0.552179	0.730083	25.2043	2.61102	14.7498
Mob. Av. Speed (mm/s)	1.79959	8.0324	15.7023	2.00909	2.69184	28.1531	5.80548	18.8003
Av. Accel (mm/s^2)	1.70464	13.1565	20.1126	2.81365	3.50931	37.6103	7.6909	19.2974
Mobility Rate (%)	0.106057	0.826841	0.736217	0.210779	0.234525	0.888061	0.42516	0.777296
Visible Frames	7500	7500	7332	7500	7500	7115	7500	7386
Visible Time (m:s)	0:05:00	0:05:00	0:04:53.280000	0:05:00	0:05:00	0:04:44.600000	0:05:00	0:04:55.440000
Invisible Frames	0	0	168	0	0	385	0	114
Invisible Time (m:s)	0:00:00	0:00:00	0:00:06.720000	0:00:00	0:00:00	0:00:15.400000	0:00:00	0:00:04.560000
First Visible Frame	7500	7500	7500	7500	7500	7500	7500	7500
Last Visible Frame	14999	14999	14999	14999	14999	14999	14999	14999
Visibility Rate (%)	1	1	0.9776	1	1	0.948667	1	0.9848
Invisibility Rate (%)	0	0	0.0224	0	0	0.0513333	0	0.0152
Explored Areas	1	4	4	2	3	4	4	4
Number of Areas	6	9	9	9	9	9	9	9
Exploration Rate (%)	0.166667	0.444444	0.444444	0.222222	0.333333	0.444444	0.444444	0.444444
Total Distance (mm)	87.1232	2041.85	3548.74	190.484	243.982	7608.26	851.186	4449.93
Transitions In	0	0	0	0	0	0	0	0
Transitions Out	0	0	0	0	0	0	0	0
Frozen Events	3	5	10	8	7	6	8	6
Tot. Time Frozen (m:s)	0:04:56.680000	0:00:34	0:01:21.760000	0:04:41.240000	0:04:30.080000	0:00:31.520000	0:02:51.640000	0:00:49.680000
Avg. Time Frozen (m:s)	0:01:38.893000	0:00:06.800000	0:00:08.176000	0:00:35.155000	0:00:38.583000	0:00:05.253000	0:00:21.455000	0:00:08.280000

## Sheet: Video_d3
SC	Replicat
	1	2	3	4	5	6	7	8
Av. Speed (mm/s)	13.1662	23.7507	1.31676	31.1498	0.20734	18.7005	17.2529	0.260704
Mob. Av. Speed (mm/s)	16.6069	27.8724	6.56065	34.7427	1.21491	20.235	18.5737	1.9006
Av. Accel (mm/s^2)	35.4727	50.217	3.2064	41.0418	1.27919	44.9648	28.5563	1.18802
Mobility Rate (%)	0.786767	0.850187	0.179429	0.895411	0.0345518	0.922026	0.927295	0.0336179
Visible Frames	7470	7500	7500	7500	7500	7468	7500	7500
Visible Time (m:s)	0:04:58.800000	0:05:00	0:05:00	0:05:00	0:05:00	0:04:58.720000	0:05:00	0:05:00
Invisible Frames	30	0	0	0	0	32	0	0
Invisible Time (m:s)	0:00:01.200000	0:00:00	0:00:00	0:00:00	0:00:00	0:00:01.280000	0:00:00	0:00:00
First Visible Frame	7500	7500	7500	7500	7500	7500	7500	7500
Last Visible Frame	14999	14999	14999	14999	14999	14999	14999	14999
Visibility Rate (%)	0.996	1	1	1	1	0.995733	1	1
Invisibility Rate (%)	0.004	0	0	0	0	0.00426667	0	0
Explored Areas	6	4	4	4	1	4	4	2
Number of Areas	9	9	9	9	9	9	9	9
Exploration Rate (%)	0.666667	0.444444	0.444444	0.444444	0.111111	0.444444	0.444444	0.222222
Total Distance (mm)	3973.95	7161.57	433.281	9388.51	88.7248	5659.82	5208.77	105.061
Transitions In	0	0	0	0	0	0	0	0
Transitions Out	0	0	0	0	0	0	0	0
Frozen Events	7	7	6	3	1	2	3	2
Tot. Time Frozen (m:s)	0:00:57.400000	0:00:39.760000	0:04:18.280000	0:00:17.760000	0:04:59.960000	0:00:08.320000	0:00:23.800000	0:04:56.920000
Avg. Time Frozen (m:s)	0:00:08.200000	0:00:05.680000	0:00:43.047000	0:00:05.920000	0:04:59.960000	0:00:04.160000	0:00:07.933000	0:02:28.460000
NC	Replicat
	1	2	3	4	5	6	7	8
Av. Speed (mm/s)	12.0154	1.22726	4.73556	5.05917	13.0578	29.2475	6.8302	1.50037
Mob. Av. Speed (mm/s)	13.8001	4.82224	8.47311	7.35744	21.3319	31.1265	11.1514	4.84898
Av. Accel (mm/s^2)	26.2491	3.29222	10.8651	11.0791	16.4673	42.8379	12.6093	4.3596
Mobility Rate (%)	0.862221	0.214573	0.53802	0.669957	0.600815	0.937568	0.601254	0.270544
Visible Frames	7262	7470	7500	7500	7364	7372	7500	7500
Visible Time (m:s)	0:04:50.480000	0:04:58.800000	0:05:00	0:05:00	0:04:54.560000	0:04:54.880000	0:05:00	0:05:00
Invisible Frames	238	30	0	0	136	128	0	0
Invisible Time (m:s)	0:00:09.520000	0:00:01.200000	0:00:00	0:00:00	0:00:05.440000	0:00:05.120000	0:00:00	0:00:00
First Visible Frame	7500	7500	7500	7500	7500	7500	7500	7500
Last Visible Frame	14999	14999	14999	14999	14999	14999	14999	14999
Visibility Rate (%)	0.968267	0.996	1	1	0.981867	0.982933	1	1
Invisibility Rate (%)	0.0317333	0.004	0	0	0.0181333	0.0170667	0	0
Explored Areas	4	3	4	4	7	4	4	4
Number of Areas	9	9	9	9	9	9	9	9
Exploration Rate (%)	0.444444	0.333333	0.444444	0.444444	0.777778	0.444444	0.444444	0.444444
Total Distance (mm)	3638.26	393.767	1454.84	1559.22	3946.43	8820.22	2070.02	478.129
Transitions In	0	0	0	0	0	0	0	0
Transitions Out	0	0	0	0	0	0	0	0
Frozen Events	4	11	17	12	8	1	12	11
Tot. Time Frozen (m:s)	0:00:18	0:04:14.560000	0:02:41.800000	0:01:45.560000	0:02:00.560000	0:00:04.360000	0:02:10.520000	0:04:10.880000
Avg. Time Frozen (m:s)	0:00:04.500000	0:00:23.142000	0:00:09.518000	0:00:08.797000	0:00:15.070000	0:00:04.360000	0:00:10.877000	0:00:22.807000
PC	Replicat
	1	2	3	4	5	6	7	8
Av. Speed (mm/s)	17.9366
Mob. Av. Speed (mm/s)	28.0255
Av. Accel (mm/s^2)	16.6131
Mobility Rate (%)	0.636145
Visible Frames	7474
Visible Time (m:s)	0:04:58.960000
Invisible Frames	26
Invisible Time (m:s)	0:00:01.040000
First Visible Frame	7500
Last Visible Frame	14999
Visibility Rate (%)	0.996533
Invisibility Rate (%)	0.00346667
Explored Areas	4
Number of Areas	9
Exploration Rate (%)	0.444444
Total Distance (mm)	5407.13
Transitions In	0
Transitions Out	0
Frozen Events	3
Tot. Time Frozen (m:s)	0:01:59.200000
Avg. Time Frozen (m:s)	0:00:39.733000
0.4 g/L	Replicat
	1	2	3	4	5	6	7	8
Av. Speed (mm/s)	15.893	4.77884	36.9213	28.9289	26.217	21.0497	9.86887	18.1626
Mob. Av. Speed (mm/s)	21.0135	7.73608	40.3976	30.7523	30.2746	24.849	13.1745	18.8941
Av. Accel (mm/s^2)	32.7136	10.8364	49.9261	45.5869	32.4624	44.2025	13.4884	21.7707
Mobility Rate (%)	0.742698	0.602321	0.911208	0.939995	0.861877	0.84445	0.738896	0.960245
Visible Frames	7194	7500	7347	7470	7367	7500	7434	7500
Visible Time (m:s)	0:04:47.760000	0:05:00	0:04:53.880000	0:04:58.800000	0:04:54.680000	0:05:00	0:04:57.360000	0:05:00
Invisible Frames	306	0	153	30	133	0	66	0
Invisible Time (m:s)	0:00:12.240000	0:00:00	0:00:06.120000	0:00:01.200000	0:00:05.320000	0:00:00	0:00:02.640000	0:00:00
First Visible Frame	7500	7500	7500	7500	7500	7500	7500	7500
Last Visible Frame	14999	14999	14999	14999	14999	14999	14999	14999
Visibility Rate (%)	0.9592	1	0.9796	0.996	0.982267	1	0.9912	1
Invisibility Rate (%)	0.0408	0	0.0204	0.004	0.0177333	0	0.0088	0
Explored Areas	4	4	6	4	4	4	6	4
Number of Areas	6	9	9	9	9	9	9	9
Exploration Rate (%)	0.666667	0.444444	0.666667	0.444444	0.444444	0.444444	0.666667	0.444444
Total Distance (mm)	4817.64	1460.55	11159.8	8722.38	7899.28	6342.77	2978.11	5462.23
Transitions In	0	0	0	0	0	0	0	0
Transitions Out	0	0	0	0	0	0	0	0
Frozen Events	8	10	3	1	3	5	7	1
Tot. Time Frozen (m:s)	0:01:10.920000	0:01:58.760000	0:00:27.680000	0:00:08.880000	0:00:37.280000	0:00:26.200000	0:01:21.200000	0:00:04.040000
Avg. Time Frozen (m:s)	0:00:08.865000	0:00:11.876000	0:00:09.227000	0:00:08.880000	0:00:12.427000	0:00:05.240000	0:00:11.600000	0:00:04.040000
1 g/L	Replicat
	1	2	3	4	5	6	7	8
Av. Speed (mm/s)	6.58744	16.4111	4.22031	25.059	17.627	3.41582	0.636237	0.991697
Mob. Av. Speed (mm/s)	9.872	17.427	7.07032	27.1369	18.8854	5.21735	2.51031	3.01902
Av. Accel (mm/s^2)	11.148	32.6082	8.41766	38.0933	36.9118	8.26703	2.69794	3.82723
Mobility Rate (%)	0.659819	0.937151	0.579242	0.921821	0.929928	0.626734	0.167156	0.269077
Visible Frames	7500	7164	7500	7474	7325	7500	7500	7500
Visible Time (m:s)	0:05:00	0:04:46.560000	0:05:00	0:04:58.960000	0:04:53	0:05:00	0:05:00	0:05:00
Invisible Frames	0	336	0	26	175	0	0	0
Invisible Time (m:s)	0:00:00	0:00:13.440000	0:00:00	0:00:01.040000	0:00:07	0:00:00	0:00:00	0:00:00
First Visible Frame	7500	7500	7500	7500	7500	7500	7500	7500
Last Visible Frame	14999	14999	14999	14999	14999	14999	14999	14999
Visibility Rate (%)	1	0.9552	1	0.996533	0.976667	1	1	1
Invisibility Rate (%)	0	0.0448	0	0.00346667	0.0233333	0	0	0
Explored Areas	4	5	7	4	4	4	2	3
Number of Areas	9	9	9	9	9	9	9	9
Exploration Rate (%)	0.444444	0.555556	0.777778	0.444444	0.444444	0.444444	0.222222	0.333333
Total Distance (mm)	1999.18	4968.25	1301.96	7569.2	5313.5	1073.08	247.36	345.133
Transitions In	0	0	0	0	0	0	0	0
Transitions Out	0	0	0	0	0	0	0	0
Frozen Events	8	3	10	2	2	14	5	11
Tot. Time Frozen (m:s)	0:01:50.880000	0:00:12.120000	0:02:15.560000	0:00:15	0:00:11.720000	0:02:07.760000	0:04:29.120000	0:04:21.160000
Avg. Time Frozen (m:s)	0:00:13.860000	0:00:04.040000	0:00:13.556000	0:00:07.500000	0:00:05.860000	0:00:09.126000	0:00:53.824000	0:00:23.742000
2.5 g/L	Replicat
	1	2	3	4	5	6	7	8
Av. Speed (mm/s)	41.0681	1.90458	0.747858	18.4654	9.74698	13.5239	3.17628	2.00117
Mob. Av. Speed (mm/s)	43.306	6.22363	2.31188	22.0621	13.1545	15.5383	6.90997	6.08501
Av. Accel (mm/s^2)	61.5294	4.38935	3.07361	36.377	18.0808	23.5777	7.34068	4.91091
Mobility Rate (%)	0.947573	0.269477	0.227855	0.833512	0.733991	0.865595	0.429963	0.298297
Visible Frames	7462	7500	7500	7446	7500	7407	7500	7463
Visible Time (m:s)	0:04:58.480000	0:05:00	0:05:00	0:04:57.840000	0:05:00	0:04:56.280000	0:05:00	0:04:58.520000
Invisible Frames	38	0	0	54	0	93	0	37
Invisible Time (m:s)	0:00:01.520000	0:00:00	0:00:00	0:00:02.160000	0:00:00	0:00:03.720000	0:00:00	0:00:01.480000
First Visible Frame	7500	7500	7500	7500	7500	7500	7500	7500
Last Visible Frame	14999	14999	14999	14999	14999	14999	14999	14999
Visibility Rate (%)	0.994933	1	1	0.9928	1	0.9876	1	0.995067
Invisibility Rate (%)	0.00506667	0	0	0.0072	0	0.0124	0	0.00493333
Explored Areas	4	6	2	4	4	4	6	4
Number of Areas	6	9	9	9	9	9	9	9
Exploration Rate (%)	0.666667	0.666667	0.222222	0.444444	0.444444	0.444444	0.666667	0.444444
Total Distance (mm)	12370.8	603.597	277.72	5570.32	2954.71	4081.53	1010.01	628.762
Transitions In	0	0	0	0	0	0	0	0
Transitions Out	0	0	0	0	0	0	0	0
Frozen Events	1	5	8	4	7	3	11	10
Tot. Time Frozen (m:s)	0:00:04.440000	0:03:55.280000	0:04:24.760000	0:00:41.560000	0:00:45.480000	0:00:12.720000	0:03:24.120000	0:03:44.720000
Avg. Time Frozen (m:s)	0:00:04.440000	0:00:47.056000	0:00:33.095000	0:00:10.390000	0:00:06.497000	0:00:04.240000	0:00:18.556000	0:00:22.472000
6.25 g/L	Replicat
	1	2	3	4	5	6	7	8
Av. Speed (mm/s)	0.178071	1.51062	18.6159	0.740992	9.11844	20.2283	1.18858	1.60365
Mob. Av. Speed (mm/s)	1.47399	4.24084	20.9428	2.45551	11.1877	24.201	2.95318	5.37028
Av. Accel (mm/s^2)	1.07473	4.72057	26.7274	3.04994	16.9389	26.2464	4.05529	4.1837
Mobility Rate (%)	0.0130736	0.292966	0.884741	0.254002	0.808298	0.826322	0.351387	0.274413
Visible Frames	7500	7411	7344	7500	7500	7207	7500	7500
Visible Time (m:s)	0:05:00	0:04:56.440000	0:04:53.760000	0:05:00	0:05:00	0:04:48.280000	0:05:00	0:05:00
Invisible Frames	0	89	156	0	0	293	0	0
Invisible Time (m:s)	0:00:00	0:00:03.560000	0:00:06.240000	0:00:00	0:00:00	0:00:11.720000	0:00:00	0:00:00
First Visible Frame	7500	7500	7500	7500	7500	7500	7500	7500
Last Visible Frame	14999	14999	14999	14999	14999	14999	14999	14999
Visibility Rate (%)	1	0.988133	0.9792	1	1	0.960933	1	1
Invisibility Rate (%)	0	0.0118667	0.0208	0	0	0.0390667	0	0
Explored Areas	1	4	6	4	4	4	4	4
Number of Areas	9	9	9	9	4	9	6	9
Exploration Rate (%)	0.111111	0.444444	0.666667	0.444444	1	0.444444	0.666667	0.444444
Total Distance (mm)	74.1328	500.422	5616.43	248.05	2770.32	6111.21	400.584	505.416
Transitions In	0	0	0	0	0	0	0	0
Transitions Out	0	0	0	0	0	0	0	0
Frozen Events	1	8	6	11	7	8	11	9
Tot. Time Frozen (m:s)	0:04:59.960000	0:04:01.320000	0:00:34.680000	0:04:33.240000	0:00:35	0:00:46.120000	0:03:27	0:03:45.520000
Avg. Time Frozen (m:s)	0:04:59.960000	0:00:30.165000	0:00:05.780000	0:00:24.840000	0:00:05	0:00:05.765000	0:00:18.818000	0:00:25.058000
15.6 g/L	Replicat
	1	2	3	4	5	6	7	8
Av. Speed (mm/s)	0.208076	12.4527	0.992376	0.254193	9.12298	21.0903	5.7623	17.2873
Mob. Av. Speed (mm/s)	1.31292	14.5015	7.95915	1.88106	12.9924	22.7617	11.3941	21.187
Av. Accel (mm/s^2)	1.30471	27.3046	2.89964	1.313	15.3129	32.7082	13.1644	32.7007
Mobility Rate (%)	0.0645678	0.854456	0.112727	0.100587	0.689585	0.92516	0.491329	0.805265
Visible Frames	7500	7500	7500	7500	7407	7500	7500	7183
Visible Time (m:s)	0:05:00	0:05:00	0:05:00	0:05:00	0:04:56.280000	0:05:00	0:05:00	0:04:47.320000
Invisible Frames	0	0	0	0	93	0	0	317
Invisible Time (m:s)	0:00:00	0:00:00	0:00:00	0:00:00	0:00:03.720000	0:00:00	0:00:00	0:00:12.680000
First Visible Frame	7500	7500	7500	7500	7500	7500	7500	7500
Last Visible Frame	14999	14999	14999	14999	14999	14999	14999	14999
Visibility Rate (%)	1	1	1	1	0.9876	1	1	0.957733
Invisibility Rate (%)	0	0	0	0	0.0124	0	0	0.0422667
Explored Areas	1	4	4	1	6	4	4	4
Number of Areas	6	9	9	9	9	9	9	9
Exploration Rate (%)	0.166667	0.444444	0.444444	0.111111	0.666667	0.444444	0.444444	0.444444
Total Distance (mm)	91.7828	3783.52	316.445	91.274	2766.59	6353.23	1801.86	5234.56
Transitions In	0	0	0	0	0	0	0	0
Transitions Out	0	0	0	0	0	0	0	0
Frozen Events	2	4	6	5	10	2	13	6
Tot. Time Frozen (m:s)	0:04:59.920000	0:00:18.520000	0:04:32.720000	0:04:56.800000	0:01:32.080000	0:00:14	0:02:47.800000	0:00:49.080000
Avg. Time Frozen (m:s)	0:02:29.960000	0:00:04.630000	0:00:45.453000	0:00:59.360000	0:00:09.208000	0:00:07	0:00:12.908000	0:00:08.180000

## Sheet: Video_d7
SC	Replicat
	1	2	3	4	5	6	7	8
Av. Speed (mm/s)	0.904202	0.341495	2.67506	0.275196	0.746253	9.21228	14.4916	12.8056
Mob. Av. Speed (mm/s)	2.76153	1.50069	4.90678	1.76654	2.80134	15.1035	16.3998	16.3641
Av. Accel (mm/s^2)	3.37867	2.1027	6.73504	1.58965	2.6264	15.7653	25.704	16.7092
Mobility Rate (%)	0.270011	0.0945838	0.518943	0.0625667	0.191702	0.599787	0.880603	0.777615
Visible Frames	7500	7500	7500	7500	7500	7500	7500	7500
Visible Time (m:s)	0:05:00	0:05:00	0:05:00	0:05:00	0:05:00	0:05:00	0:05:00	0:05:00
Invisible Frames	0	0	0	0	0	0	0	0
Invisible Time (m:s)	0:00:00	0:00:00	0:00:00	0:00:00	0:00:00	0:00:00	0:00:00	0:00:00
First Visible Frame	7500	7500	7500	7500	7500	7500	7500	7500
Last Visible Frame	14999	14999	14999	14999	14999	14999	14999	14999
Visibility Rate (%)	1	1	1	1	1	1	1	1
Invisibility Rate (%)	0	0	0	0	0	0	0	0
Explored Areas	4	2	4	1	3	6	7	4
Number of Areas	9	9	9	9	9	9	9	9
Exploration Rate (%)	0.444444	0.222222	0.444444	0.111111	0.333333	0.666667	0.777778	0.444444
Total Distance (mm)	297.932	130.905	834.55	111.353	259.391	2837.06	4393.66	3861.47
Transitions In	0	0	0	0	0	0	0	0
Transitions Out	0	0	0	0	0	0	0	0
Frozen Events	7	2	15	3	6	9	3	12
Tot. Time Frozen (m:s)	0:04:15.080000	0:04:58.040000	0:02:47.160000	0:04:51.600000	0:04:35.840000	0:01:54.640000	0:00:15.400000	0:00:57.960000
Avg. Time Frozen (m:s)	0:00:36.440000	0:02:29.020000	0:00:11.144000	0:01:37.200000	0:00:45.973000	0:00:12.738000	0:00:05.133000	0:00:04.830000
NC	Replicat
	1	2	3	4	5	6	7	8
Av. Speed (mm/s)	1.57093	1.37151	0.291015	5.07322	3.73764	2.5646	0.274376	3.09891
Mob. Av. Speed (mm/s)	3.78669	5.47555	1.92235	8.10747	9.02708	5.20171	1.45371	6.96924
Av. Accel (mm/s^2)	5.1926	3.4771	1.45884	10.5119	8.42478	6.38497	1.66298	7.68798
Mobility Rate (%)	0.363958	0.21945	0.0695037	0.613927	0.372132	0.452908	0.0574973	0.420624
Visible Frames	7362	7500	7500	7500	7238	7500	7500	7500
Visible Time (m:s)	0:04:54.480000	0:05:00	0:05:00	0:05:00	0:04:49.520000	0:05:00	0:05:00	0:05:00
Invisible Frames	138	0	0	0	262	0	0	0
Invisible Time (m:s)	0:00:05.520000	0:00:00	0:00:00	0:00:00	0:00:10.480000	0:00:00	0:00:00	0:00:00
First Visible Frame	7500	7500	7500	7500	7500	7500	7500	7500
Last Visible Frame	14999	14999	14999	14999	14999	14999	14999	14999
Visibility Rate (%)	0.9816	1	1	1	0.965067	1	1	1
Invisibility Rate (%)	0.0184	0	0	0	0.0349333	0	0	0
Explored Areas	4	4	1	4	4	4	1	4
Number of Areas	9	9	9	9	9	9	9	9
Exploration Rate (%)	0.444444	0.444444	0.111111	0.444444	0.444444	0.444444	0.111111	0.444444
Total Distance (mm)	504.826	440.854	112.886	1560.42	1155.78	824.27	120.453	963.125
Transitions In	0	0	0	0	0	0	0	0
Transitions Out	0	0	0	0	0	0	0	0
Frozen Events	15	9	3	7	12	9	2	6
Tot. Time Frozen (m:s)	0:03:27	0:04:05.680000	0:04:54.080000	0:02:06.120000	0:03:09.440000	0:03:07.880000	0:04:59.920000	0:03:16.480000
Avg. Time Frozen (m:s)	0:00:13.800000	0:00:27.298000	0:01:38.027000	0:00:18.017000	0:00:15.787000	0:00:20.876000	0:02:29.960000	0:00:32.747000
PC	Replicat
	1	2	3	4	5	6	7	8
Av. Speed (mm/s)
Mob. Av. Speed (mm/s)
Av. Accel (mm/s^2)
Mobility Rate (%)
Visible Frames
Visible Time (m:s)
Invisible Frames
Invisible Time (m:s)
First Visible Frame
Last Visible Frame
Visibility Rate (%)
Invisibility Rate (%)
Explored Areas
Number of Areas
Exploration Rate (%)
Total Distance (mm)
Transitions In
Transitions Out
Frozen Events
Tot. Time Frozen (m:s)
Avg. Time Frozen (m:s)
0.4 g/L	Replicat
	1	2	3	4	5	6	7	8
Av. Speed (mm/s)	0.335432	7.63869	14.226	4.00466	1.9036	5.30075	2.68736	11.4537
Mob. Av. Speed (mm/s)	2.01743	10.1023	21.2412	7.86073	4.45108	10.6979	6.74383	15.4781
Av. Accel (mm/s^2)	1.84264	15.3345	27.2043	9.16684	4.39782	13.1183	10.0548	23.4525
Mobility Rate (%)	0.0695037	0.746531	0.663954	0.493063	0.3754	0.484658	0.372065	0.735993
Visible Frames	7500	7500	7500	7500	7191	7500	7500	7500
Visible Time (m:s)	0:05:00	0:05:00	0:05:00	0:05:00	0:04:47.640000	0:05:00	0:05:00	0:05:00
Invisible Frames	0	0	0	0	309	0	0	0
Invisible Time (m:s)	0:00:00	0:00:00	0:00:00	0:00:00	0:00:12.360000	0:00:00	0:00:00	0:00:00
First Visible Frame	7500	7500	7500	7500	7500	7500	7500	7500
Last Visible Frame	14999	14999	14999	14999	14999	14999	14999	14999
Visibility Rate (%)	1	1	1	1	0.9588	1	1	1
Invisibility Rate (%)	0	0	0	0	0.0412	0	0	0
Explored Areas	2	4	6	4	3	4	5	4
Number of Areas	9	9	9	9	9	9	9	9
Exploration Rate (%)	0.222222	0.444444	0.666667	0.444444	0.333333	0.444444	0.555556	0.444444
Total Distance (mm)	144.558	2318.13	4314.94	1227.49	598.231	1624.24	866.275	3470.34
Transitions In	0	0	0	0	0	0	0	0
Transitions Out	0	0	0	0	0	0	0	0
Frozen Events	3	10	5	7	17	9	7	7
Tot. Time Frozen (m:s)	0:04:56.120000	0:01:05.880000	0:01:32.560000	0:02:28.600000	0:03:34.560000	0:02:22.880000	0:03:45.240000	0:01:12.960000
Avg. Time Frozen (m:s)	0:01:38.707000	0:00:06.588000	0:00:18.512000	0:00:21.229000	0:00:12.621000	0:00:15.876000	0:00:32.177000	0:00:10.423000
1 g/L	Replicat
	1	2	3	4	5	6	7	8
Av. Speed (mm/s)	10.2829	5.02281	2.06134	17.8388	0.288564	3.6197	2.87534	21.8691
Mob. Av. Speed (mm/s)	12.3267	8.5687	3.21612	19.5323	1.74147	5.85334	6.34033	26.1718
Av. Accel (mm/s^2)	16.5822	9.68756	7.33563	48.2299	1.47317	7.06845	8.36333	50.2082
Mobility Rate (%)	0.825608	0.562492	0.587712	0.911019	0.0413554	0.587444	0.428228	0.833244
Visible Frames	7361	7405	7426	7500	7500	7363	7500	7500
Visible Time (m:s)	0:04:54.440000	0:04:56.200000	0:04:57.040000	0:05:00	0:05:00	0:04:54.520000	0:05:00	0:05:00
Invisible Frames	139	95	74	0	0	137	0	0
Invisible Time (m:s)	0:00:05.560000	0:00:03.800000	0:00:02.960000	0:00:00	0:00:00	0:00:05.480000	0:00:00	0:00:00
First Visible Frame	7500	7500	7500	7500	7500	7500	7500	7500
Last Visible Frame	14999	14999	14999	14999	14999	14999	14999	14999
Visibility Rate (%)	0.981467	0.987333	0.990133	1	1	0.981733	1	1
Invisibility Rate (%)	0.0185333	0.0126667	0.00986667	0	0	0.0182667	0	0
Explored Areas	6	3	6	4	2	4	4	4
Number of Areas	9	9	9	9	9	9	9	9
Exploration Rate (%)	0.666667	0.333333	0.666667	0.444444	0.222222	0.444444	0.444444	0.444444
Total Distance (mm)	3101.69	1544.7	691.101	5418.01	116.523	1124.94	893.87	6614.32
Transitions In	0	0	0	0	0	0	0	0
Transitions Out	0	0	0	0	0	0	0	0
Frozen Events	4	13	13	3	2	7	16	9
Tot. Time Frozen (m:s)	0:00:31.360000	0:02:22.720000	0:02:26.720000	0:00:12.800000	0:04:58	0:01:59.600000	0:03:03	0:00:49.560000
Avg. Time Frozen (m:s)	0:00:07.840000	0:00:10.978000	0:00:11.286000	0:00:04.267000	0:02:29	0:00:17.086000	0:00:11.437000	0:00:05.507000
2.5 g/L	Replicat
	1	2	3	4	5	6	7	8
Av. Speed (mm/s)	1.086	0.188114	1.86903	26.2115	20.7941	22.8061	1.55214	5.28769
Mob. Av. Speed (mm/s)	4.78402	1.40298	8.3495	28.0063	28.1806	24.8656	4.09262	7.31225
Av. Accel (mm/s^2)	3.4253	1.05126	5.25481	41.6317	37.7545	48.7332	4.56234	15.1263
Mobility Rate (%)	0.182764	0.00853789	0.202641	0.93269	0.720174	0.915472	0.326441	0.707444
Visible Frames	7500	7500	7500	7254	7112	7469	7500	7500
Visible Time (m:s)	0:05:00	0:05:00	0:05:00	0:04:50.160000	0:04:44.480000	0:04:58.760000	0:05:00	0:05:00
Invisible Frames	0	0	0	246	388	31	0	0
Invisible Time (m:s)	0:00:00	0:00:00	0:00:00	0:00:09.840000	0:00:15.520000	0:00:01.240000	0:00:00	0:00:00
First Visible Frame	7500	7500	7500	7500	7500	7500	7500	7500
Last Visible Frame	14999	14999	14999	14999	14999	14999	14999	14999
Visibility Rate (%)	1	1	1	0.9672	0.948267	0.995867	1	1
Invisibility Rate (%)	0	0	0	0.0328	0.0517333	0.00413333	0	0
Explored Areas	4	1	4	4	4	4	2	4
Number of Areas	9	9	9	9	9	9	9	9
Exploration Rate (%)	0.444444	0.111111	0.444444	0.444444	0.444444	0.444444	0.222222	0.444444
Total Distance (mm)	362.349	81.6251	584.151	7909.04	6284.91	6880.92	504.702	1611.95
Transitions In	0	0	0	0	0	0	0	0
Transitions Out	0	0	0	0	0	0	0	0
Frozen Events	6	1	9	2	10	2	15	12
Tot. Time Frozen (m:s)	0:04:31.600000	0:04:59.960000	0:04:12.640000	0:00:13.680000	0:00:58.960000	0:00:08.640000	0:04:12.560000	0:01:30.400000
Avg. Time Frozen (m:s)	0:00:45.267000	0:04:59.960000	0:00:28.071000	0:00:06.840000	0:00:05.896000	0:00:04.320000	0:00:16.837000	0:00:07.533000
6.25 g/L	Replicat
	1	2	3	4	5	6	7	8
Av. Speed (mm/s)	8.031	2.75178	7.51402	0.565995	5.70472	11.0916	1.12987	2.11244
Mob. Av. Speed (mm/s)	9.80123	4.67029	11.5707	2.36627	8.55991	15.5048	4.08631	5.86009
Av. Accel (mm/s^2)	14.7148	6.75014	15.8165	2.28535	12.0558	19.1535	3.42144	5.16528
Mobility Rate (%)	0.81076	0.550694	0.639758	0.153815	0.652615	0.705257	0.23039	0.330576
Visible Frames	7439	7500	7449	7500	7500	7441	7500	7500
Visible Time (m:s)	0:04:57.560000	0:05:00	0:04:57.960000	0:05:00	0:05:00	0:04:57.640000	0:05:00	0:05:00
Invisible Frames	61	0	51	0	0	59	0	0
Invisible Time (m:s)	0:00:02.440000	0:00:00	0:00:02.040000	0:00:00	0:00:00	0:00:02.360000	0:00:00	0:00:00
First Visible Frame	7500	7500	7500	7500	7500	7500	7500	7500
Last Visible Frame	14999	14999	14999	14999	14999	14999	14999	14999
Visibility Rate (%)	0.991867	1	0.9932	1	1	0.992133	1	1
Invisibility Rate (%)	0.00813333	0	0.0068	0	0	0.00786667	0	0
Explored Areas	6	4	5	3	4	4	3	4
Number of Areas	9	9	9	9	6	9	9	9
Exploration Rate (%)	0.666667	0.444444	0.555556	0.333333	0.666667	0.444444	0.333333	0.444444
Total Distance (mm)	2429.67	860.135	2282.76	200.715	1743	3359.71	378.237	665.103
Transitions In	0	0	0	0	0	0	0	0
Transitions Out	0	0	0	0	0	0	0	0
Frozen Events	8	11	10	7	16	10	8	5
Tot. Time Frozen (m:s)	0:00:37.040000	0:02:20.520000	0:01:54.600000	0:04:37.320000	0:01:42.160000	0:01:29.560000	0:04:18.160000	0:03:36.240000
Avg. Time Frozen (m:s)	0:00:04.630000	0:00:12.775000	0:00:11.460000	0:00:39.617000	0:00:06.385000	0:00:08.956000	0:00:32.270000	0:00:43.248000
15.6 g/L	Replicat
	1	2	3	4	5	6	7	8
Av. Speed (mm/s)	0.902235	23.7426	25.0827	0.479515	9.1648	2.63297	1.22811	2.51187
Mob. Av. Speed (mm/s)	3.12278	26.7236	26.3776	1.43857	14.7738	6.10013	3.1873	4.83315
Av. Accel (mm/s^2)	3.32271	35.3265	44.2996	2.41078	15.0188	5.41413	5.26291	7.21449
Mobility Rate (%)	0.219662	0.886473	0.948312	0.132604	0.610859	0.402481	0.32444	0.486526
Visible Frames	7470	7500	7259	7500	7500	7500	7500	7500
Visible Time (m:s)	0:04:58.800000	0:05:00	0:04:50.360000	0:05:00	0:05:00	0:05:00	0:05:00	0:05:00
Invisible Frames	30	0	241	0	0	0	0	0
Invisible Time (m:s)	0:00:01.200000	0:00:00	0:00:09.640000	0:00:00	0:00:00	0:00:00	0:00:00	0:00:00
First Visible Frame	7500	7500	7500	7500	7500	7500	7500	7500
Last Visible Frame	14999	14999	14999	14999	14999	14999	14999	14999
Visibility Rate (%)	0.996	1	0.967867	1	1	1	1	1
Invisibility Rate (%)	0.004	0	0.0321333	0	0	0	0	0
Explored Areas	3	5	7	1	6	4	4	4
Number of Areas	9	9	9	9	9	9	9	9
Exploration Rate (%)	0.333333	0.555556	0.777778	0.111111	0.666667	0.444444	0.444444	0.444444
Total Distance (mm)	308.871	7188.34	7561.1	190.039	2772.54	818.405	447.918	786.972
Transitions In	0	0	0	0	0	0	0	0
Transitions Out	0	0	0	0	0	0	0	0
Frozen Events	6	3	0	1	12	10	13	22
Tot. Time Frozen (m:s)	0:04:37.640000	0:00:13.480000	0:00:00	0:04:59.960000	0:01:59.560000	0:03:23.440000	0:03:34.880000	0:02:47.440000
Avg. Time Frozen (m:s)	0:00:46.273000	0:00:04.493000	0:00:00	0:04:59.960000	0:00:09.963000	0:00:20.344000	0:00:16.529000	0:00:07.611000

## Sheet: Video_d14
SC	Replicat
	1	2	3	4	5	6	7	8
Av. Speed (mm/s)	3.1284	1.68555	0.88515	4.30646	7.26368	18.9107		0.342207
Mob. Av. Speed (mm/s)	5.255	3.77588	3.28995	7.60877	18.4299	20.5906		2.37921
Av. Accel (mm/s^2)	8.22056	5.21398	2.39235	8.91386	16.1782	43.1355		1.65247
Mobility Rate (%)	0.563512	0.381403	0.205309	0.544614	0.385139	0.916355		0.0820438
Visible Frames	7475	7500	7500	7468	7500	7500		7500
Visible Time (m:s)	0:04:59	0:05:00	0:05:00	0:04:58.720000	0:05:00	0:05:00		0:05:00
Invisible Frames	25	0	0	32	0	0		0
Invisible Time (m:s)	0:00:01	0:00:00	0:00:00	0:00:01.280000	0:00:00	0:00:00		0:00:00
First Visible Frame	7500	7500	7500	7500	7500	7500		7500
Last Visible Frame	14999	14999	14999	14999	14999	14999		14999
Visibility Rate (%)	0.996667	1	1	0.995733	1	1		1
Invisibility Rate (%)	0.00333333	0	0	0.00426667	0	0		0
Explored Areas	4	4	3	4	4	4		2
Number of Areas	4	9	9	9	9	9		9
Exploration Rate (%)	1	0.444444	0.333333	0.444444	0.444444	0.444444		0.222222
Total Distance (mm)	966.867	546.235	289.058	1309.61	2210.4	5729.55		118.671
Transitions In	0	0	0	0	0	0		0
Transitions Out	0	0	0	0	0	0		0
Frozen Events	12	9	9	13	13	3		3
Tot. Time Frozen (m:s)	0:02:07.680000	0:03:56.720000	0:04:24.640000	0:02:18.400000	0:03:23.920000	0:00:12.640000		0:04:50.920000
Avg. Time Frozen (m:s)	0:00:10.640000	0:00:26.302000	0:00:29.404000	0:00:10.646000	0:00:15.686000	0:00:04.213000		0:01:36.973000
NC	Replicat
	1	2	3	4	5	6	7	8
Av. Speed (mm/s)	12.7157	0.375392	0.52006	3.56875	14.1826	5.28265	19.8431	2.29801
Mob. Av. Speed (mm/s)	13.0671	3.0081	2.20943	6.72414	17.9674	9.99156	25.2829	5.47058
Av. Accel (mm/s^2)	37.4262	1.5719	2.38553	9.17261	27.8976	10.2635	32.5929	6.31854
Mobility Rate (%)	0.971916	0.072572	0.162086	0.512673	0.782638	0.510406	0.779082	0.382871
Visible Frames	7446	7500	7500	7500	7457	7500	7414	7500
Visible Time (m:s)	0:04:57.840000	0:05:00	0:05:00	0:05:00	0:04:58.280000	0:05:00	0:04:56.560000	0:05:00
Invisible Frames	54	0	0	0	43	0	86	0
Invisible Time (m:s)	0:00:02.160000	0:00:00	0:00:00	0:00:00	0:00:01.720000	0:00:00	0:00:03.440000	0:00:00
First Visible Frame	7500	7500	7500	7500	7500	7500	7500	7500
Last Visible Frame	14999	14999	14999	14999	14999	14999	14999	14999
Visibility Rate (%)	0.9928	1	1	1	0.994267	1	0.988533	1
Invisibility Rate (%)	0.0072	0	0	0	0.00573333	0	0.0114667	0
Explored Areas	4	2	1	4	4	4	6	4
Number of Areas	9	9	9	9	9	9	9	9
Exploration Rate (%)	0.444444	0.222222	0.111111	0.444444	0.444444	0.444444	0.666667	0.444444
Total Distance (mm)	3829.82	131.838	189.119	1101.37	4291.92	1620.62	5983.97	715.45
Transitions In	0	0	0	0	0	0	0	0
Transitions Out	0	0	0	0	0	0	0	0
Frozen Events	0	4	6	16	12	12	11	14
Tot. Time Frozen (m:s)	0:00:00	0:04:53.120000	0:04:41.600000	0:02:42.640000	0:01:08.960000	0:02:36.720000	0:01:11.080000	0:03:30.160000
Avg. Time Frozen (m:s)	0:00:00	0:01:13.280000	0:00:46.933000	0:00:10.165000	0:00:05.747000	0:00:13.060000	0:00:06.462000	0:00:15.011000
PC	Replicat
	1	2	3	4	5	6	7	8
Av. Speed (mm/s)
Mob. Av. Speed (mm/s)
Av. Accel (mm/s^2)
Mobility Rate (%)
Visible Frames
Visible Time (m:s)
Invisible Frames
Invisible Time (m:s)
First Visible Frame
Last Visible Frame
Visibility Rate (%)
Invisibility Rate (%)
Explored Areas
Number of Areas
Exploration Rate (%)
Total Distance (mm)
Transitions In
Transitions Out
Frozen Events
Tot. Time Frozen (m:s)
Avg. Time Frozen (m:s)
0.4 g/L	Replicat
	1	2	3	4	5	6	7	8
Av. Speed (mm/s)	9.27076	4.98709	7.61901	50.2186	0.748258	5.65161	7.75433	16.0289
Mob. Av. Speed (mm/s)	12.8641	7.22978	10.7759	51.3092	2.70309	12.2819	12.596	18.7158
Av. Accel (mm/s^2)	22.6518	12.4844	17.5512	55.6732	2.93051	12.6042	14.0447	24.7414
Mobility Rate (%)	0.713314	0.673026	0.699173	0.976643	0.188367	0.425635	0.603522	0.853122
Visible Frames	7500	7500	7500	6897	7500	7205	7500	7500
Visible Time (m:s)	0:05:00	0:05:00	0:05:00	0:04:35.880000	0:05:00	0:04:48.200000	0:05:00	0:05:00
Invisible Frames	0	0	0	603	0	295	0	0
Invisible Time (m:s)	0:00:00	0:00:00	0:00:00	0:00:24.120000	0:00:00	0:00:11.800000	0:00:00	0:00:00
First Visible Frame	7500	7500	7500	7500	7500	7500	7500	7500
Last Visible Frame	14999	14999	14999	14999	14999	14999	14999	14999
Visibility Rate (%)	1	1	1	0.9196	1	0.960667	1	1
Invisibility Rate (%)	0	0	0	0.0804	0	0.0393333	0	0
Explored Areas	4	4	6	4	2	4	6	4
Number of Areas	9	9	9	9	9	9	9	9
Exploration Rate (%)	0.444444	0.444444	0.666667	0.444444	0.222222	0.444444	0.666667	0.444444
Total Distance (mm)	2811.27	1524.61	2316.82	15216.6	252.046	1724.7	2356.15	4833.19
Transitions In	0	0	0	0	0	0	0	0
Transitions Out	0	0	0	0	0	0	0	0
Frozen Events	9	16	8	1	8	14	14	3
Tot. Time Frozen (m:s)	0:01:20.680000	0:01:37.360000	0:01:29.760000	0:00:03.760000	0:04:25.520000	0:02:50.240000	0:01:59.400000	0:00:30.680000
Avg. Time Frozen (m:s)	0:00:08.964000	0:00:06.085000	0:00:11.220000	0:00:03.760000	0:00:33.190000	0:00:12.160000	0:00:08.529000	0:00:10.227000
1 g/L	Replicat
	1	2	3	4	5	6	7	8
Av. Speed (mm/s)	1.50875	19.0435	10.3701	3.40382	18.0297	8.81384	48.3905	11.6634
Mob. Av. Speed (mm/s)	3.74153	21.7783	13.1429	6.45586	18.7546	15.1945	48.7895	15.2196
Av. Accel (mm/s^2)	4.156	33.6423	16.0817	7.80765	35.0529	14.8999	87.2585	18.3376
Mobility Rate (%)	0.355656	0.869701	0.781472	0.501334	0.959459	0.571638	0.991729	0.739061
Visible Frames	7500	7364	7463	7500	7330	7500	7500	6860
Visible Time (m:s)	0:05:00	0:04:54.560000	0:04:58.520000	0:05:00	0:04:53.200000	0:05:00	0:05:00	0:04:34.400000
Invisible Frames	0	136	37	0	170	0	0	640
Invisible Time (m:s)	0:00:00	0:00:05.440000	0:00:01.480000	0:00:00	0:00:06.800000	0:00:00	0:00:00	0:00:25.600000
First Visible Frame	7500	7500	7500	7500	7500	7500	7500	7500
Last Visible Frame	14999	14999	14999	14999	14999	14999	14999	14999
Visibility Rate (%)	1	0.981867	0.995067	1	0.977333	1	1	0.914667
Invisibility Rate (%)	0	0.0181333	0.00493333	0	0.0226667	0	0	0.0853333
Explored Areas	4	4	6	4	8	4	7	4
Number of Areas	9	9	9	9	9	9	9	9
Exploration Rate (%)	0.444444	0.444444	0.666667	0.444444	0.888889	0.444444	0.777778	0.444444
Total Distance (mm)	481.468	5739.12	3129.07	1053.59	5438.56	2679.19	14675.9	3593.2
Transitions In	0	0	0	0	0	0	0	0
Transitions Out	0	0	0	0	0	0	0	0
Frozen Events	14	6	7	12	1	8	0	8
Tot. Time Frozen (m:s)	0:03:34.080000	0:00:25.680000	0:01:04.360000	0:02:42.960000	0:00:03.480000	0:02:08.520000	0:00:00	0:01:23.120000
Avg. Time Frozen (m:s)	0:00:15.291000	0:00:04.280000	0:00:09.194000	0:00:13.580000	0:00:03.480000	0:00:16.065000	0:00:00	0:00:10.390000
2.5 g/L	Replicat
	1	2	3	4	5	6	7	8
Av. Speed (mm/s)	25.1131	2.40906	2.34123	2.41221	19.9293	23.9064	35.8818	1.56683
Mob. Av. Speed (mm/s)	26.7299	7.93466	5.26265	7.34974	23.3908	25.1043	39.5235	3.81404
Av. Accel (mm/s^2)	40.9728	4.87114	6.89416	6.2735	29.5639	49.2299	37.7884	5.18638
Mobility Rate (%)	0.938412	0.270668	0.410752	0.311099	0.84952	0.951075	0.906617	0.365662
Visible Frames	7473	7419	7500	7500	7500	7444	7500	7500
Visible Time (m:s)	0:04:58.920000	0:04:56.760000	0:05:00	0:05:00	0:05:00	0:04:57.760000	0:05:00	0:05:00
Invisible Frames	27	81	0	0	0	56	0	0
Invisible Time (m:s)	0:00:01.080000	0:00:03.240000	0:00:00	0:00:00	0:00:00	0:00:02.240000	0:00:00	0:00:00
First Visible Frame	7500	7500	7500	7500	7500	7500	7500	7500
Last Visible Frame	14999	14999	14999	14999	14999	14999	14999	14999
Visibility Rate (%)	0.9964	0.9892	1	1	1	0.992533	1	1
Invisibility Rate (%)	0.0036	0.0108	0	0	0	0.00746667	0	0
Explored Areas	4	4	4	3	4	6	8	4
Number of Areas	9	9	9	9	9	9	9	9
Exploration Rate (%)	0.444444	0.444444	0.444444	0.333333	0.444444	0.666667	0.888889	0.444444
Total Distance (mm)	7566.14	746.591	730.937	745.951	6004.17	7196.23	10826.6	503.396
Transitions In	0	0	0	0	0	0	0	0
Transitions Out	0	0	0	0	0	0	0	0
Frozen Events	1	8	14	13	7	0	3	18
Tot. Time Frozen (m:s)	0:00:12.080000	0:03:53.800000	0:03:09.440000	0:03:46.800000	0:00:39.520000	0:00:00	0:00:16.680000	0:03:58.160000
Avg. Time Frozen (m:s)	0:00:12.080000	0:00:29.225000	0:00:13.531000	0:00:17.446000	0:00:05.646000	0:00:00	0:00:05.560000	0:00:13.231000
6.25 g/L	Replicat
	1	2	3	4	5	6	7	8
Av. Speed (mm/s)	4.10442	2.50509	24.3992	tot	35.2592	24.0285	15.0282	2.57422
Mob. Av. Speed (mm/s)	12.3941	7.19556	25.2439		36.5798	26.005	23.0173	5.22668
Av. Accel (mm/s^2)	11.2356	6.06651	46.913		68.8712	35.1875	31.7635	5.12929
Mobility Rate (%)	0.316035	0.329909	0.965848		0.963447	0.91852	0.648479	0.462846
Visible Frames	7500	7500	7500		7500	7110	7500	7473
Visible Time (m:s)	0:05:00	0:05:00	0:05:00		0:05:00	0:04:44.400000	0:05:00	0:04:58.920000
Invisible Frames	0	0	0		0	390	0	27
Invisible Time (m:s)	0:00:00	0:00:00	0:00:00		0:00:00	0:00:15.600000	0:00:00	0:00:01.080000
First Visible Frame	7500	7500	7500		7500	7500	7500	7500
Last Visible Frame	14999	14999	14999		14999	14999	14999	14999
Visibility Rate (%)	1	1	1		1	0.948	1	0.9964
Invisibility Rate (%)	0	0	0		0	0.052	0	0.0036
Explored Areas	4	4	4		5	4	4	4
Number of Areas	9	9	9		9	9	9	9
Exploration Rate (%)	0.444444	0.444444	0.444444		0.555556	0.444444	0.444444	0.444444
Total Distance (mm)	1269.58	777.305	7354		10627.7	7241.19	4547.55	791.539
Transitions In	0	0	0		0	0	0	0
Transitions Out	0	0	0		0	0	0	0
Frozen Events	12	8	1		1	2	15	13
Tot. Time Frozen (m:s)	0:03:46.880000	0:03:41.320000	0:00:03.680000		0:00:04.360000	0:00:09.280000	0:01:43.400000	0:03:11.440000
Avg. Time Frozen (m:s)	0:00:18.907000	0:00:27.665000	0:00:03.680000		0:00:04.360000	0:00:04.640000	0:00:06.893000	0:00:14.726000
15.6 g/L	Replicat
	1	2	3	4	5	6	7	8
Av. Speed (mm/s)	0.84922	27.2133	36.9389	8.37967	12.4158	20.6126	41.6345	3.66236
Mob. Av. Speed (mm/s)	4.60681	30.6177	37.9298	11.6111	15.9539	22.3699	41.7384	5.78591
Av. Accel (mm/s^2)	2.49203	44.3733	44.9122	17.0619	22.7442	39.9153	70.4789	7.78919
Mobility Rate (%)	0.144877	0.88714	0.973453	0.713714	0.771448	0.919824	0.997428	0.613527
Visible Frames	7500	7500	7500	7500	7464	7500	7390	7500
Visible Time (m:s)	0:05:00	0:05:00	0:05:00	0:05:00	0:04:58.560000	0:05:00	0:04:55.600000	0:05:00
Invisible Frames	0	0	0	0	36	0	110	0
Invisible Time (m:s)	0:00:00	0:00:00	0:00:00	0:00:00	0:00:01.440000	0:00:00	0:00:04.400000	0:00:00
First Visible Frame	7500	7500	7500	7500	7500	7500	7500	7500
Last Visible Frame	14999	14999	14999	14999	14999	14999	14999	14999
Visibility Rate (%)	1	1	1	1	0.9952	1	0.985333	1
Invisibility Rate (%)	0	0	0	0	0.0048	0	0.0146667	0
Explored Areas	3	4	4	4	4	4	5	4
Number of Areas	9	9	9	9	9	9	9	9
Exploration Rate (%)	0.333333	0.444444	0.444444	0.444444	0.444444	0.444444	0.555556	0.444444
Total Distance (mm)	283.393	8229.41	11107	2546.2	3748.27	6214.29	12587.2	1123.4
Transitions In	0	0	0	0	0	0	0	0
Transitions Out	0	0	0	0	0	0	0	0
Frozen Events	4	5	0	5	8	2	0	15
Tot. Time Frozen (m:s)	0:04:12.480000	0:00:25.520000	0:00:00	0:01:17.720000	0:00:54.920000	0:00:09.040000	0:00:00	0:01:45.520000
Avg. Time Frozen (m:s)	0:01:03.120000	0:00:05.104000	0:00:00	0:00:15.544000	0:00:06.865000	0:00:04.520000	0:00:00	0:00:07.035000
