# Supplementary material for: Locomotor behavior of Neocaridina palmata: a study with leachates from UV-weathered microplastics
Source: PeerJ. 2021 Nov 9;9:e12442. doi: 10.7717/peerj.12442 (PMC8588861; doi:10.7717/peerj.12442)
Supplement: Supplemental Information 5 — Raw measurements of water parameters, room temperature and humidity, mortality, molting and all analyzed video parameters of the freshwater shrimps on days 1, 3, 7, and 14 in the test with SB foil after UV-A/B irradiation. [file peerj-09-12442-s005.xlsx]

## Sheet: timetable
	day	-1	0	1	2	3	4	5	6	7	8	9	10	11	12	13	14
	datum	2019-11-14	2019-11-18	2019-11-19	2019-11-20	2019-11-21	2019-11-22	2019-11-23	2019-11-24	2019-11-25	2019-11-26	2019-11-27	2019-11-28	2019-11-29	2019-11-30	2019-12-01	2019-12-02
	to do	Preparations	start of test														end of test
			Feeding
				mortality/ecdysis control
				video		video				video							video
							water exchange				water exchange				water exchange
			Water parameters														Water parameters
											Ammonium						Ammonium

## Sheet: water parameter
		pH	conductivity	oxygen		temperature	CaCO3			ammonium
			[µS/cm]	[mg/L]	[%]	[°C]	[°d]	[mmol/L]	[mg/L]	[mg/L]
Test start	medium	7.54	512	8.43	100.4	22.7	3.5	1.25	76.275	0
day 8	NC	7.71	662	8.18	98.7	23.4	4.5	1.6	97.632	1.6
	PC
	SC	7.64	611	8.23	99.5	23.4	4.3	1.5	91.53	1.6
	0.4 g/L	7.68	610	8.08	97.7	23.4	4.5	1.8	109.836	1.6
	1 g/L	7.79	677	8.17	98.8	23.4	4.5	1.8	109.836	1.6
	2.5 g/L	7.65	577	8.1	98.1	23.5	4.2	1.5	91.53	1.6
	6.25 g/L	7.6	577	8.01	96.9	23.4	4.4	1.6	97.632	1.2
	15.6 g/L	7.62	588	8.02	97	23.4	4.2	1.5	91.53	1.6
end of test	NC	7.68	560	8.44	99	22.9	4.8	1.7	103.734	0.25
	SC	7.66	534	8.32	97.4	22.8	4.9	1.75	106.785	0.05
	0.4 g/L	7.71	545	8.34	97.7	22.8	4.8	1.7	103.734	0.05
	1 g/L	7.7	537	8.4	98	22.7	4.9	1.75	106.785	0.3
	2.5 g/L	7.68	522	8.31	97.8	23.1	4.9	1.75	106.785	0.25
	6.25 g/L	7.72	543	8.31	97.8	23.1	4.9	1.75	106.785	0.2
	15.6 g/L	7.63	528	8.16	96	23.1	4.8	1.7	103.734	0.075
mean		7.66733	569.429	8.23333	98.0533	23.14	4.54	1.64333	100.276	0.798333
SD		0.0568585	48.6984	0.13874	1.06262	0.284722	0.375588	0.147045	8.97268	0.70737

## Sheet: mortality
Treatment		dead individuals on day
		1	2	3	4	5	6	7	8	9	10	11	12	13	14		1 = dead
NC	1	0	0	0	0	0	0	0	0	0	0	0	0	0	0		0 = abnormal behavior (e.g. back position)
	2	0	0	0	0	0	0	0	0	0	0	0	0	0	0		0 = normal
	3	0	0	0	0	0	0	0	0	0	0	0	0	0	0
	4	0	0	0	0	0	0	0	0	0	0	0	0	0	0
	5	0	0	0	0	0	0	0	0	0	0	0	0	0	0
	6	0	0	0	0	0	0	0	0	0	0	0	0	0	0
	7	0	0	0	0	0	0	0	0	0	0	0	0	0	0
	8	0	0	0	0	0	0	0	0	0	0	0	0	0	0
PC	1	0	0	1	1	1	1	1	1	1	1	1	1	1	1
	2	0	0	0	0	0	1	1	1	1	1	1	1	1	1
	3	0	0	0	1	1	1	1	1	1	1	1	1	1	1
	4	0	0	0	0	1	1	1	1	1	1	1	1	1	1
	5	1	1	1	1	1	1	1	1	1	1	1	1	1	1
	6	0	1	1	1	1	1	1	1	1	1	1	1	1	1
	7	0	0	1	1	1	1	1	1	1	1	1	1	1	1
	8	0	0	1	1	1	1	1	1	1	1	1	1	1	1
SC	1	0	0	0	0	0	0	0	0	0	0	0	0	0	0
	2	0	0	0	0	0	0	0	0	0	0	0	0	0	0
	3	0	0	0	0	0	0	0	0	0	0	0	0	0	0
	4	0	0	0	0	0	0	0	0	0	0	0	0	0	0
	5	0	0	0	0	0	0	0	0	0	0	0	0	0	0
	6	0	0	0	0	0	0	0	0	0	0	0	0	0	0
	7	0	0	0	0	0	0	0	0	0	0	0	0	0	0
	8	0	0	0	0	0	0	0	0	0	0	0	0	0	0
0.4 g/L	1	0	0	0	0	0	0	0	0	0	0	0	0	0	0
	2	0	0	0	0	0	0	0	0	0	0	0	0	0	0
	3	0	0	0	0	0	0	0	0	0	0	0	0	0	0
	4	0	0	0	0	0	0	0	0	0	0	0	0	0	0
	5	0	0	0	0	0	0	0	0	0	0	0	0	0	0
	6	0	0	0	0	0	0	0	0	0	0	0	0	0	0
	7	0	0	0	0	0	0	0	0	0	0	0	0	0	0
	8	0	0	0	0	0	0	0	0	0	0	0	0	0	0
1 g/L	1	0	0	0	0	0	0	0	0	0	0	0	0	0	0
	2	0	0	0	0	0	0	0	0	0	0	0	0	0	0
	3	0	0	0	0	0	0	0	0	0	0	0	0	0	0
	4	0	0	0	0	0	0	0	0	0	0	0	0	0	0
	5	0	0	0	0	0	0	0	0	0	0	0	0	0	0
	6	0	0	0	0	0	0	0	0	0	0	0	0	0	0
	7	0	0	0	0	0	0	0	0	0	0	0	0	0	0
	8	0	0	0	0	0	0	0	0	0	0	0	0	0	0
2.5 g/L	1	0	0	0	0	0	0	0	0	0	0	0	0	0	0
	2	0	0	0	0	0	0	0	0	0	0	0	0	0	0
	3	0	0	0	0	0	0	0	0	0	0	0	0	0	0
	4	0	0	0	0	0	0	0	0	0	0	0	0	0	0
	5	0	0	0	0	0	0	0	0	0	0	0	0	0	0
	6	0	0	0	0	0	0	0	0	0	0	0	0	0	0
	7	0	0	0	0	0	0	0	0	0	0	0	0	0	0
	8	0	0	0	0	0	0	0	0	0	0	0	0	0	0
6.25 g/L	1	0	0	0	0	0	0	0	0	0	0	0	0	0	0
	2	0	0	0	0	0	0	0	0	0	0	0	0	0	0
	3	0	0	0	0	0	0	0	0	0	0	0	0	0	0
	4	0	0	0	0	0	0	0	0	0	0	0	0	0	0
	5	0	0	0	0	0	0	0	0	0	0	0	0	0	0
	6	0	0	0	0	0	0	0	0	0	0	0	0	0	0
	7	0	0	0	0	0	0	0	0	0	0	0	0	0	0
	8	0	0	0	0	0	0	0	0	0	0	0	0	0	0
15.6 g/L	1	0	0	0	0	0	0	0	0	0	0	0	0	0	0
	2	0	0	0	0	0	0	0	0	0	0	0	0	0	0
	3	0	0	0	0	0	0	0	0	0	0	0	0	0	0
	4	0	0	0	0	0	0	0	0	0	0	0	0	0	0
	5	0	0	0	0	0	0	0	0	0	0	0	0	0	0
	6	0	0	0	0	0	0	0	0	0	0	0	0	0	0
	7	0	0	0	0	0	0	0	0	0	0	0	0	0	0
	8	0	0	0	0	0	0	0	0	0	0	0	0	0	0

## Sheet: ecdysis
Treatment		ecdysis on day														no. of ecdysis			inter-molt-period [d]
		1	2	3	4	5	6	7	8	9	10	11	12	13	14	per replicate	mean	SD
NC	1	0	0	0	0	0	0	0	1	0	0	0	0	0	0	1	1.25	0.433013			1 = new exuviae found
	2	0	0	0	0	0	1	0	0	0	0	0	0	0	0	1					0 = no new exuviae
	3	0	0	0	1	0	0	0	0	0	0	0	1	0	0	2			8
	4	0	0	0	0	0	0	0	1	0	0	0	0	0	0	1
	5	0	1	0	0	0	0	0	0	0	1	0	0	0	0	2			8
	6	0	0	0	0	0	0	0	0	0	1	0	0	0	0	1
	7	0	0	0	1	0	0	0	0	0	0	0	0	0	0	1
	8	0	0	0	0	0	0	0	1	0	0	0	0	0	0	1
PC	1	0	0													0	0.125	0.330719
	2	0	0	0	0	0										0
	3	0	0	0												0
	4	0	0	0	0											0
	5															0
	6	0														0
	7	0	0													0
	8	0	0	1												1
SC	1	0	0	0	0	0	0	0	1	0	0	0	0	0	0	1	1.25	0.433013
	2	0	0	0	1	0	0	0	0	0	0	0	0	0	0	1
	3	0	1	0	0	0	0	0	0	0	1	0	0	0	0	2			8
	4	0	1	0	0	0	0	0	0	0	0	1	0	0	0	2			9
	5	0	0	0	0	0	0	0	1	0	0	0	0	0	0	1
	6	0	0	0	0	0	0	0	0	0	0	0	1	0	0	1
	7	0	0	0	0	0	0	0	0	1	0	0	0	0	0	1
	8	0	0	0	1	0	0	0	0	0	0	0	0	0	0	1
0.4 g/L	1	0	0	0	0	0	0	0	0	1	0	0	0	0	0	1	1	0
	2	0	0	0	0	0	0	0	0	0	1	0	0	0	0	1
	3	0	0	0	0	0	0	0	0	1	0	0	0	0	0	1
	4	0	0	0	0	1	0	0	0	0	0	0	0	0	0	1
	5	0	0	0	0	0	1	0	0	0	0	0	0	0	0	1
	6	0	0	0	0	0	1	0	0	0	0	0	0	0	0	1
	7	0	0	0	1	0	0	0	0	0	0	0	0	0	0	1
	8	0	0	0	0	0	0	0	0	1	0	0	0	0	0	1
1 g/L	1	0	0	0	0	0	0	0	1	0	0	0	0	0	0	1	1	0
	2	0	0	0	0	0	0	0	0	0	1	0	0	0	0	1
	3	0	0	0	0	0	0	0	0	1	0	0	0	0	0	1
	4	0	0	0	0	1	0	0	0	0	0	0	0	0	0	1
	5	0	0	0	0	0	0	0	0	0	1	0	0	0	0	1
	6	0	0	0	0	0	0	0	1	0	0	0	0	0	0	1
	7	0	0	0	0	0	0	0	1	0	0	0	0	0	0	1
	8	0	0	0	0	1	0	0	0	0	0	0	0	0	0	1
2.5 g/L	1	0	0	0	0	0	0	0	1	0	0	0	0	0	0	1	1.625	0.484123
	2	0	0	1	0	0	0	0	0	0	0	0	1	0	0	2			9
	3	0	0	0	0	1	0	0	0	0	0	0	0	0	1	2			9
	4	0	0	0	0	0	0	1	0	0	0	0	0	0	0	1
	5	0	1	0	0	0	0	0	0	0	1	0	0	0	0	2			8
	6	0	1	0	0	0	0	0	0	0	1	0	0	0	0	2			8
	7	0	0	0	0	0	0	0	0	0	1	0	0	0	0	1
	8	0	0	1	0	0	0	0	0	0	0	1	0	0	0	2			8
6.25 g/L	1	0	0	0	0	0	0	1	0	0	0	0	0	0	0	1	1.5	0.5
	2	0	0	0	0	0	0	0	1	0	0	0	0	0	0	1
	3	0	0	0	0	0	0	0	0	0	0	1	0	0	0	1
	4	0	0	0	0	0	0	0	0	0	0	0	1	0	0	1
	5	0	1	0	0	0	0	0	0	0	0	0	1	0	0	2			10
	6	1	0	0	0	0	0	0	0	1	0	0	0	0	0	2			8
	7	0	0	1	0	0	0	0	0	0	0	1	0	0	0	2			8
	8	1	0	0	0	0	0	0	0	0	0	0	1	0	0	2			11
15.6 g/L	1	1	0	0	0	0	0	0	0	0	1	0	0	0	0	2	1.375	0.695971	9
	2	0	0	0	0	0	0	0	0	1	0	0	0	0	0	1
	3	0	0	0	0	0	0	0	1	0	0	0	0	0	0	1
	4	0	0	0	0	1	0	0	0	0	0	0	0	0	1	2			9
	5	1	0	0	0	0	0	0	0	0	0	1	0	0	0	2			10
	6	0	0	0	0	1	0	0	0	0	0	0	0	0	0	1
	7	0	0	0	0	0	0	0	0	0	0	0	0	0	0	0
	8	1	0	0	0	0	0	0	0	0	0	0	1	0	0	2			11
															Mean	1.28571
															SD	0.48969

## Sheet: body parameter
Treatment		sex	body length	carapax length
		(0=f, 1=m)	[mm]	[mm]
NC	1	0	12.59	5.25
	2	0	12.61	5.03
	3	1	11.94	4.92
	4	1	12	4.47
	5	1	11.97	4.53
	6	0	11.83	4.63
	7	0	14.93	6.5
	8	1	11.6	4.86
PC	1	0	12.44	5.39				Bodylength	Mean	12.1543
	2	0	13.29	5.6					SD	1.02118
	3	1	12.04	5.15					% males	54.6875
	4	1				not measureable anymore
	5	0	12.4	5.35
	6	0	12.63	5.22
	7	1	11.89	4.95
	8	1				not measureable anymore
SC	1	1	11.51	4.98
	2	1	11.79	5.22
	3	1	11.83	4.87
	4	1	11.74	4.97
	5	1	11.71	4.93
	6	0	13.89	5.46
	7	1	11.46	4.66
	8	1	13.36	5.7
0.4 g/L	1	1	12.14	5.24
	2	0	12.71	5.6
	3	0	11.93	4.85
	4	0	10.5	4.41
	5	1	12.91	5.58
	6	0	12.61	5.01
	7	0	14.52	6.42
	8	0	12.94	5.1
1 g/L	1	1	11.58	5.21
	2	0	12.81	5.21
	3	1	11.55	4.69
	4	0	12.28	5.05
	5	1	10.4	4.52
	6	0	12.12	4.89
	7	1	11.18	4.88
	8	0	13.64	5.98
2.5 g/L	1	0	12.95	5.88
	2	1	11.37	4.65
	3	0	12.89	5.69
	4	0	12.7	5.36
	5	1	11.79	4.58
	6	1	11.97	4.79
	7	1	14.95	6.54
	8	1	11.95	4.59
6.25 g/L	1	1	12.02	5.25
	2	0	13.78	5.8
	3	1	11.76	4.93
	4	0	11.01	4.56
	5	1	11.23	4.9
	6	1	11.03	4.67
	7	1	10.61	4.37
	8	0	11.73	4.94
15.6 g/L	1	1	10.42	4.69
	2	1	11.41	4.86
	3	1	12.2	5.25
	4	1	11.11	4.96
	5	0	13.69	5.7
	6	0	11.98	5.49
	7	0	11.93	5.27
	8	0	11.58	5.27
T0	1	0	12.75	4.91
	2	0	12.47	5.55
	3	1	11.36	4.86
	4	0	13.64	5.95
	5	0	14.42	5.81
	6	1	11.69	4.68
	7	0	12.43	5.42
	8	0	12.5	4.93
	9	0	13.04	5.41
	10	0	12.49	4.83

## Sheet: room temperature
Date Time, GMT+02:00	Temp, °C	RH, %			Temp, °C	RH, %
11/18/2019 08:22:54 am	25.222	10.8		Mean	25.2067	14.6855
11/18/2019 08:37:54 am	25.222	10.8		SD	0.0871815	7.5018
11/18/2019 08:52:54 am	25.222	10.8		Min	24.931	10.8
11/18/2019 09:07:54 am	25.222	10.8		Max	25.513	32.3
11/18/2019 09:22:54 am	25.222	10.8
11/18/2019 09:37:54 am	25.319	10.8
11/18/2019 09:52:54 am	25.416	21.5
11/18/2019 10:07:54 am	25.416	10.8
11/18/2019 10:22:54 am	25.416	10.8
11/18/2019 10:37:54 am	25.416	10.8
11/18/2019 10:52:54 am	25.319	10.8
11/18/2019 11:07:54 am	25.319	10.8
11/18/2019 11:22:54 am	25.222	10.8
11/18/2019 11:37:54 am	25.222	10.8
11/18/2019 11:52:54 am	25.222	10.8
11/18/2019 12:07:54 pm	25.222	10.8
11/18/2019 12:22:54 pm	25.222	10.8
11/18/2019 12:37:54 pm	25.222	10.8
11/18/2019 12:52:54 pm	25.222	10.8
11/18/2019 01:07:54 pm	25.222	21.5
11/18/2019 01:22:54 pm	25.222	10.8
11/18/2019 01:37:54 pm	25.222	10.8
11/18/2019 01:52:54 pm	25.222	10.8
11/18/2019 02:07:54 pm	25.222	10.8
11/18/2019 02:22:54 pm	25.222	10.8
11/18/2019 02:37:54 pm	25.319	10.8
11/18/2019 02:52:54 pm	25.319	10.8
11/18/2019 03:07:54 pm	25.222	10.8
11/18/2019 03:22:54 pm	25.222	10.8
11/18/2019 03:37:54 pm	25.222	10.8
11/18/2019 03:52:54 pm	25.222	10.8
11/18/2019 04:07:54 pm	25.222	10.8
11/18/2019 04:22:54 pm	25.125	10.8
11/18/2019 04:37:54 pm	25.125	10.8
11/18/2019 04:52:54 pm	25.125	10.8
11/18/2019 05:07:54 pm	25.125	10.8
11/18/2019 05:22:54 pm	25.222	10.8
11/18/2019 05:37:54 pm	25.222	10.8
11/18/2019 05:52:54 pm	25.125	10.8
11/18/2019 06:07:54 pm	25.125	10.8
11/18/2019 06:22:54 pm	25.125	10.8
11/18/2019 06:37:54 pm	25.125	10.8
11/18/2019 06:52:54 pm	25.125	10.8
11/18/2019 07:07:54 pm	25.125	10.8
11/18/2019 07:22:54 pm	25.125	10.8
11/18/2019 07:37:54 pm	25.125	10.8
11/18/2019 07:52:54 pm	25.125	10.8
11/18/2019 08:07:54 pm	25.125	10.8
11/18/2019 08:22:54 pm	25.125	10.8
11/18/2019 08:37:54 pm	25.125	10.8
11/18/2019 08:52:54 pm	25.125	10.8
11/18/2019 09:07:54 pm	25.125	10.8
11/18/2019 09:22:54 pm	25.125	10.8
11/18/2019 09:37:54 pm	25.125	10.8
11/18/2019 09:52:54 pm	25.125	10.8
11/18/2019 10:07:54 pm	25.125	10.8
11/18/2019 10:22:54 pm	25.125	10.8
11/18/2019 10:37:54 pm	25.125	10.8
11/18/2019 10:52:54 pm	25.125	10.8
11/18/2019 11:07:54 pm	25.125	10.8
11/18/2019 11:22:54 pm	25.125	10.8
11/18/2019 11:37:54 pm	25.222	10.8
11/18/2019 11:52:54 pm	25.222	10.8
11/19/2019 12:07:54 am	25.222	10.8
11/19/2019 12:22:54 am	25.319	10.8
11/19/2019 12:37:54 am	25.222	10.8
11/19/2019 12:52:54 am	25.222	10.8
11/19/2019 01:07:54 am	25.222	10.8
11/19/2019 01:22:54 am	25.125	10.8
11/19/2019 01:37:54 am	25.125	10.8
11/19/2019 01:52:54 am	25.125	10.8
11/19/2019 02:07:54 am	25.125	10.8
11/19/2019 02:22:54 am	25.125	10.8
11/19/2019 02:37:54 am	25.125	10.8
11/19/2019 02:52:54 am	25.125	10.8
11/19/2019 03:07:54 am	25.125	10.8
11/19/2019 03:22:54 am	25.125	10.8
11/19/2019 03:37:54 am	25.125	10.8
11/19/2019 03:52:54 am	25.125	10.8
11/19/2019 04:07:54 am	25.125	10.8
11/19/2019 04:22:54 am	25.125	10.8
11/19/2019 04:37:54 am	25.125	10.8
11/19/2019 04:52:54 am	25.125	10.8
11/19/2019 05:07:54 am	25.125	10.8
11/19/2019 05:22:54 am	25.125	10.8
11/19/2019 05:37:54 am	25.125	10.8
11/19/2019 05:52:54 am	25.125	10.8
11/19/2019 06:07:54 am	25.125	10.8
11/19/2019 06:22:54 am	25.125	10.8
11/19/2019 06:37:54 am	25.125	10.8
11/19/2019 06:52:54 am	25.125	10.8
11/19/2019 07:07:54 am	25.125	10.8
11/19/2019 07:22:54 am	25.125	10.8
11/19/2019 07:37:54 am	25.125	10.8
11/19/2019 07:52:54 am	25.125	10.8
11/19/2019 08:07:54 am	25.125	10.8
11/19/2019 08:22:54 am	25.125	10.8
11/19/2019 08:37:54 am	25.125	10.8
11/19/2019 08:52:54 am	25.125	10.8
11/19/2019 09:07:54 am	25.222	10.8
11/19/2019 09:22:54 am	25.222	32.3
11/19/2019 09:37:54 am	25.222	32.3
11/19/2019 09:52:54 am	25.222	32.3
11/19/2019 10:07:54 am	25.319	32.3
11/19/2019 10:22:54 am	25.319	32.3
11/19/2019 10:37:54 am	25.319	21.5
11/19/2019 10:52:54 am	25.319	32.3
11/19/2019 11:07:54 am	25.319	32.3
11/19/2019 11:22:54 am	25.319	21.5
11/19/2019 11:37:54 am	25.319	21.5
11/19/2019 11:52:54 am	25.319	21.5
11/19/2019 12:07:54 pm	25.416	32.3
11/19/2019 12:22:54 pm	25.416	32.3
11/19/2019 12:37:54 pm	25.416	21.5
11/19/2019 12:52:54 pm	25.319	21.5
11/19/2019 01:07:54 pm	25.319	32.3
11/19/2019 01:22:54 pm	25.319	32.3
11/19/2019 01:37:54 pm	25.319	32.3
11/19/2019 01:52:54 pm	25.222	32.3
11/19/2019 02:07:54 pm	25.319	32.3
11/19/2019 02:22:54 pm	25.319	32.3
11/19/2019 02:37:54 pm	25.319	21.5
11/19/2019 02:52:54 pm	25.319	32.3
11/19/2019 03:07:54 pm	25.319	21.5
11/19/2019 03:22:54 pm	25.319	32.3
11/19/2019 03:37:54 pm	25.319	21.5
11/19/2019 03:52:54 pm	25.319	32.3
11/19/2019 04:07:54 pm	25.319	32.3
11/19/2019 04:22:54 pm	25.319	21.5
11/19/2019 04:37:54 pm	25.319	21.5
11/19/2019 04:52:54 pm	25.319	32.3
11/19/2019 05:07:54 pm	25.319	32.3
11/19/2019 05:22:54 pm	25.416	21.5
11/19/2019 05:37:54 pm	25.319	32.3
11/19/2019 05:52:54 pm	25.319	21.5
11/19/2019 06:07:54 pm	25.319	32.3
11/19/2019 06:22:54 pm	25.319	32.3
11/19/2019 06:37:54 pm	25.319	32.3
11/19/2019 06:52:54 pm	25.319	21.5
11/19/2019 07:07:54 pm	25.319	21.5
11/19/2019 07:22:54 pm	25.319	32.3
11/19/2019 07:37:54 pm	25.319	32.3
11/19/2019 07:52:54 pm	25.319	32.3
11/19/2019 08:07:54 pm	25.319	21.5
11/19/2019 08:22:54 pm	25.319	32.3
11/19/2019 08:37:54 pm	25.319	32.3
11/19/2019 08:52:54 pm	25.319	21.5
11/19/2019 09:07:54 pm	25.319	21.5
11/19/2019 09:22:54 pm	25.319	21.5
11/19/2019 09:37:54 pm	25.319	21.5
11/19/2019 09:52:54 pm	25.319	21.5
11/19/2019 10:07:54 pm	25.319	21.5
11/19/2019 10:22:54 pm	25.319	21.5
11/19/2019 10:37:54 pm	25.319	21.5
11/19/2019 10:52:54 pm	25.319	32.3
11/19/2019 11:07:54 pm	25.319	21.5
11/19/2019 11:22:54 pm	25.319	21.5
11/19/2019 11:37:54 pm	25.319	21.5
11/19/2019 11:52:54 pm	25.319	21.5
11/20/2019 12:07:54 am	25.319	21.5
11/20/2019 12:22:54 am	25.319	21.5
11/20/2019 12:37:54 am	25.319	21.5
11/20/2019 12:52:54 am	25.319	21.5
11/20/2019 01:07:54 am	25.319	21.5
11/20/2019 01:22:54 am	25.319	21.5
11/20/2019 01:37:54 am	25.319	21.5
11/20/2019 01:52:54 am	25.319	21.5
11/20/2019 02:07:54 am	25.222	21.5
11/20/2019 02:22:54 am	25.222	21.5
11/20/2019 02:37:54 am	25.222	21.5
11/20/2019 02:52:54 am	25.319	21.5
11/20/2019 03:07:54 am	25.319	21.5
11/20/2019 03:22:54 am	25.416	21.5
11/20/2019 03:37:54 am	25.416	21.5
11/20/2019 03:52:54 am	25.319	21.5
11/20/2019 04:07:54 am	25.319	21.5
11/20/2019 04:22:54 am	25.319	21.5
11/20/2019 04:37:54 am	25.319	21.5
11/20/2019 04:52:54 am	25.319	32.3
11/20/2019 05:07:54 am	25.319	21.5
11/20/2019 05:22:54 am	25.319	21.5
11/20/2019 05:37:54 am	25.222	32.3
11/20/2019 05:52:54 am	25.222	32.3
11/20/2019 06:07:54 am	25.222	32.3
11/20/2019 06:22:54 am	25.222	32.3
11/20/2019 06:37:54 am	25.222	21.5
11/20/2019 06:52:54 am	25.222	32.3
11/20/2019 07:07:54 am	25.222	32.3
11/20/2019 07:22:54 am	25.319	32.3
11/20/2019 07:37:54 am	25.319	32.3
11/20/2019 07:52:54 am	25.319	32.3
11/20/2019 08:07:54 am	25.319	21.5
11/20/2019 08:22:54 am	25.222	32.3
11/20/2019 08:37:54 am	25.222	32.3
11/20/2019 08:52:54 am	25.319	21.5
11/20/2019 09:07:54 am	25.319	32.3
11/20/2019 09:22:54 am	25.319	32.3
11/20/2019 09:37:54 am	25.319	10.8
11/20/2019 09:52:54 am	25.319	21.5
11/20/2019 10:07:54 am	25.319	10.8
11/20/2019 10:22:54 am	25.222	21.5
11/20/2019 10:37:54 am	25.222	10.8
11/20/2019 10:52:54 am	25.222	10.8
11/20/2019 11:07:54 am	25.222	10.8
11/20/2019 11:22:54 am	25.222	10.8
11/20/2019 11:37:54 am	25.222	10.8
11/20/2019 11:52:54 am	25.125	21.5
11/20/2019 12:07:54 pm	25.222	10.8
11/20/2019 12:22:54 pm	25.222	10.8
11/20/2019 12:37:54 pm	25.222	21.5
11/20/2019 12:52:54 pm	25.222	10.8
11/20/2019 01:07:54 pm	25.222	21.5
11/20/2019 01:22:54 pm	25.222	21.5
11/20/2019 01:37:54 pm	25.125	10.8
11/20/2019 01:52:54 pm	25.125	21.5
11/20/2019 02:07:54 pm	25.125	10.8
11/20/2019 02:22:54 pm	25.125	10.8
11/20/2019 02:37:54 pm	25.222	10.8
11/20/2019 02:52:54 pm	25.222	10.8
11/20/2019 03:07:54 pm	25.222	21.5
11/20/2019 03:22:54 pm	25.222	10.8
11/20/2019 03:37:54 pm	25.222	21.5
11/20/2019 03:52:54 pm	25.222	10.8
11/20/2019 04:07:54 pm	25.222	10.8
11/20/2019 04:22:54 pm	25.222	10.8
11/20/2019 04:37:54 pm	25.222	10.8
11/20/2019 04:52:54 pm	25.222	10.8
11/20/2019 05:07:54 pm	25.222	10.8
11/20/2019 05:22:54 pm	25.222	10.8
11/20/2019 05:37:54 pm	25.222	10.8
11/20/2019 05:52:54 pm	25.222	10.8
11/20/2019 06:07:54 pm	25.222	10.8
11/20/2019 06:22:54 pm	25.222	10.8
11/20/2019 06:37:54 pm	25.222	10.8
11/20/2019 06:52:54 pm	25.222	10.8
11/20/2019 07:07:54 pm	25.222	10.8
11/20/2019 07:22:54 pm	25.222	10.8
11/20/2019 07:37:54 pm	25.222	10.8
11/20/2019 07:52:54 pm	25.222	10.8
11/20/2019 08:07:54 pm	25.222	10.8
11/20/2019 08:22:54 pm	25.319	10.8
11/20/2019 08:37:54 pm	25.416	10.8
11/20/2019 08:52:54 pm	25.319	10.8
11/20/2019 09:07:54 pm	25.319	10.8
11/20/2019 09:22:54 pm	25.222	10.8
11/20/2019 09:37:54 pm	25.222	10.8
11/20/2019 09:52:54 pm	25.222	10.8
11/20/2019 10:07:54 pm	25.222	10.8
11/20/2019 10:22:54 pm	25.222	10.8
11/20/2019 10:37:54 pm	25.222	10.8
11/20/2019 10:52:54 pm	25.222	10.8
11/20/2019 11:07:54 pm	25.222	10.8
11/20/2019 11:22:54 pm	25.222	10.8
11/20/2019 11:37:54 pm	25.222	10.8
11/20/2019 11:52:54 pm	25.222	10.8
11/21/2019 12:07:54 am	25.222	10.8
11/21/2019 12:22:54 am	25.222	10.8
11/21/2019 12:37:54 am	25.222	10.8
11/21/2019 12:52:54 am	25.222	10.8
11/21/2019 01:07:54 am	25.222	10.8
11/21/2019 01:22:54 am	25.222	10.8
11/21/2019 01:37:54 am	25.222	10.8
11/21/2019 01:52:54 am	25.125	10.8
11/21/2019 02:07:54 am	25.125	10.8
11/21/2019 02:22:54 am	25.125	10.8
11/21/2019 02:37:54 am	25.125	10.8
11/21/2019 02:52:54 am	25.125	10.8
11/21/2019 03:07:54 am	25.125	10.8
11/21/2019 03:22:54 am	25.125	10.8
11/21/2019 03:37:54 am	25.222	10.8
11/21/2019 03:52:54 am	25.222	10.8
11/21/2019 04:07:54 am	25.222	10.8
11/21/2019 04:22:54 am	25.125	10.8
11/21/2019 04:37:54 am	25.222	10.8
11/21/2019 04:52:54 am	25.222	10.8
11/21/2019 05:07:54 am	25.222	10.8
11/21/2019 05:22:54 am	25.222	10.8
11/21/2019 05:37:54 am	25.222	10.8
11/21/2019 05:52:54 am	25.125	10.8
11/21/2019 06:07:54 am	25.125	10.8
11/21/2019 06:22:54 am	25.125	10.8
11/21/2019 06:37:54 am	25.125	10.8
11/21/2019 06:52:54 am	25.125	10.8
11/21/2019 07:07:54 am	25.222	10.8
11/21/2019 07:22:54 am	25.125	10.8
11/21/2019 07:37:54 am	25.125	10.8
11/21/2019 07:52:54 am	25.125	10.8
11/21/2019 08:07:54 am	25.125	10.8
11/21/2019 08:22:54 am	25.028	10.8
11/21/2019 08:37:54 am	25.028	10.8
11/21/2019 08:52:54 am	25.125	10.8
11/21/2019 09:07:54 am	25.125	32.3
11/21/2019 09:22:54 am	25.222	32.3
11/21/2019 09:37:54 am	25.222	21.5
11/21/2019 09:52:54 am	25.319	32.3
11/21/2019 10:07:54 am	25.416	32.3
11/21/2019 10:22:54 am	25.319	21.5
11/21/2019 10:37:54 am	25.319	32.3
11/21/2019 10:52:54 am	25.319	32.3
11/21/2019 11:07:54 am	25.319	21.5
11/21/2019 11:22:54 am	25.319	21.5
11/21/2019 11:37:54 am	25.319	32.3
11/21/2019 11:52:54 am	25.319	32.3
11/21/2019 12:07:54 pm	25.319	32.3
11/21/2019 12:22:54 pm	25.319	10.8
11/21/2019 12:37:54 pm	25.319	10.8
11/21/2019 12:52:54 pm	25.319	10.8
11/21/2019 01:07:54 pm	25.222	10.8
11/21/2019 01:22:54 pm	25.222	10.8
11/21/2019 01:37:54 pm	25.125	10.8
11/21/2019 01:52:54 pm	25.125	10.8
11/21/2019 02:07:54 pm	25.125	10.8
11/21/2019 02:22:54 pm	25.125	10.8
11/21/2019 02:37:54 pm	25.125	10.8
11/21/2019 02:52:54 pm	25.125	10.8
11/21/2019 03:07:54 pm	25.125	10.8
11/21/2019 03:22:54 pm	25.125	10.8
11/21/2019 03:37:54 pm	25.125	10.8
11/21/2019 03:52:54 pm	25.222	10.8
11/21/2019 04:07:54 pm	25.222	21.5
11/21/2019 04:22:54 pm	25.319	32.3
11/21/2019 04:37:54 pm	25.319	32.3
11/21/2019 04:52:54 pm	25.319	32.3
11/21/2019 05:07:54 pm	25.222	32.3
11/21/2019 05:22:54 pm	25.319	32.3
11/21/2019 05:37:54 pm	25.319	32.3
11/21/2019 05:52:54 pm	25.319	21.5
11/21/2019 06:07:54 pm	25.319	21.5
11/21/2019 06:22:54 pm	25.319	21.5
11/21/2019 06:37:54 pm	25.319	32.3
11/21/2019 06:52:54 pm	25.319	32.3
11/21/2019 07:07:54 pm	25.319	32.3
11/21/2019 07:22:54 pm	25.319	32.3
11/21/2019 07:37:54 pm	25.319	32.3
11/21/2019 07:52:54 pm	25.319	21.5
11/21/2019 08:07:54 pm	25.319	21.5
11/21/2019 08:22:54 pm	25.319	21.5
11/21/2019 08:37:54 pm	25.319	32.3
11/21/2019 08:52:54 pm	25.319	21.5
11/21/2019 09:07:54 pm	25.222	32.3
11/21/2019 09:22:54 pm	25.319	21.5
11/21/2019 09:37:54 pm	25.319	21.5
11/21/2019 09:52:54 pm	25.319	21.5
11/21/2019 10:07:54 pm	25.319	21.5
11/21/2019 10:22:54 pm	25.319	21.5
11/21/2019 10:37:54 pm	25.319	32.3
11/21/2019 10:52:54 pm	25.319	21.5
11/21/2019 11:07:54 pm	25.319	21.5
11/21/2019 11:22:54 pm	25.319	21.5
11/21/2019 11:37:54 pm	25.319	21.5
11/21/2019 11:52:54 pm	25.319	21.5
11/22/2019 12:07:54 am	25.319	21.5
11/22/2019 12:22:54 am	25.319	21.5
11/22/2019 12:37:54 am	25.319	21.5
11/22/2019 12:52:54 am	25.319	21.5
11/22/2019 01:07:54 am	25.319	21.5
11/22/2019 01:22:54 am	25.319	21.5
11/22/2019 01:37:54 am	25.319	21.5
11/22/2019 01:52:54 am	25.319	21.5
11/22/2019 02:07:54 am	25.222	32.3
11/22/2019 02:22:54 am	25.222	21.5
11/22/2019 02:37:54 am	25.222	21.5
11/22/2019 02:52:54 am	25.222	21.5
11/22/2019 03:07:54 am	25.222	21.5
11/22/2019 03:22:54 am	25.319	21.5
11/22/2019 03:37:54 am	25.222	21.5
11/22/2019 03:52:54 am	25.222	32.3
11/22/2019 04:07:54 am	25.222	21.5
11/22/2019 04:22:54 am	25.222	21.5
11/22/2019 04:37:54 am	25.319	32.3
11/22/2019 04:52:54 am	25.319	21.5
11/22/2019 05:07:54 am	25.222	32.3
11/22/2019 05:22:54 am	25.222	32.3
11/22/2019 05:37:54 am	25.222	21.5
11/22/2019 05:52:54 am	25.222	32.3
11/22/2019 06:07:54 am	25.222	32.3
11/22/2019 06:22:54 am	25.222	32.3
11/22/2019 06:37:54 am	25.222	21.5
11/22/2019 06:52:54 am	25.222	32.3
11/22/2019 07:07:54 am	25.222	32.3
11/22/2019 07:22:54 am	25.222	32.3
11/22/2019 07:37:54 am	25.222	21.5
11/22/2019 07:52:54 am	25.222	32.3
11/22/2019 08:07:54 am	25.125	32.3
11/22/2019 08:22:54 am	25.125	32.3
11/22/2019 08:37:54 am	25.125	32.3
11/22/2019 08:52:54 am	25.125	32.3
11/22/2019 09:07:54 am	25.125	32.3
11/22/2019 09:22:54 am	25.125	10.8
11/22/2019 09:37:54 am	25.125	10.8
11/22/2019 09:52:54 am	25.125	10.8
11/22/2019 10:07:54 am	25.125	10.8
11/22/2019 10:22:54 am	25.125	10.8
11/22/2019 10:37:54 am	25.125	10.8
11/22/2019 10:52:54 am	25.222	10.8
11/22/2019 11:07:54 am	25.222	10.8
11/22/2019 11:22:54 am	25.416	10.8
11/22/2019 11:37:54 am	25.513	10.8
11/22/2019 11:52:54 am	25.416	10.8
11/22/2019 12:07:54 pm	25.319	10.8
11/22/2019 12:22:54 pm	25.222	10.8
11/22/2019 12:37:54 pm	25.222	10.8
11/22/2019 12:52:54 pm	25.125	10.8
11/22/2019 01:07:54 pm	25.125	10.8
11/22/2019 01:22:54 pm	25.125	10.8
11/22/2019 01:37:54 pm	25.125	10.8
11/22/2019 01:52:54 pm	25.222	10.8
11/22/2019 02:07:54 pm	25.222	10.8
11/22/2019 02:22:54 pm	25.319	21.5
11/22/2019 02:37:54 pm	25.222	10.8
11/22/2019 02:52:54 pm	25.125	10.8
11/22/2019 03:07:54 pm	25.028	10.8
11/22/2019 03:22:54 pm	25.028	10.8
11/22/2019 03:37:54 pm	25.028	10.8
11/22/2019 03:52:54 pm	25.028	10.8
11/22/2019 04:07:54 pm	25.028	10.8
11/22/2019 04:22:54 pm	25.125	10.8
11/22/2019 04:37:54 pm	25.125	10.8
11/22/2019 04:52:54 pm	25.125	10.8
11/22/2019 05:07:54 pm	25.222	10.8
11/22/2019 05:22:54 pm	25.222	10.8
11/22/2019 05:37:54 pm	25.222	10.8
11/22/2019 05:52:54 pm	25.222	10.8
11/22/2019 06:07:54 pm	25.222	10.8
11/22/2019 06:22:54 pm	25.222	10.8
11/22/2019 06:37:54 pm	25.222	10.8
11/22/2019 06:52:54 pm	25.222	10.8
11/22/2019 07:07:54 pm	25.222	10.8
11/22/2019 07:22:54 pm	25.222	10.8
11/22/2019 07:37:54 pm	25.222	10.8
11/22/2019 07:52:54 pm	25.222	10.8
11/22/2019 08:07:54 pm	25.222	10.8
11/22/2019 08:22:54 pm	25.222	10.8
11/22/2019 08:37:54 pm	25.222	10.8
11/22/2019 08:52:54 pm	25.222	10.8
11/22/2019 09:07:54 pm	25.222	10.8
11/22/2019 09:22:54 pm	25.222	10.8
11/22/2019 09:37:54 pm	25.222	10.8
11/22/2019 09:52:54 pm	25.222	10.8
11/22/2019 10:07:54 pm	25.319	10.8
11/22/2019 10:22:54 pm	25.319	10.8
11/22/2019 10:37:54 pm	25.319	10.8
11/22/2019 10:52:54 pm	25.319	10.8
11/22/2019 11:07:54 pm	25.319	10.8
11/22/2019 11:22:54 pm	25.319	10.8
11/22/2019 11:37:54 pm	25.319	10.8
11/22/2019 11:52:54 pm	25.319	10.8
11/23/2019 12:07:54 am	25.319	10.8
11/23/2019 12:22:54 am	25.319	10.8
11/23/2019 12:37:54 am	25.319	10.8
11/23/2019 12:52:54 am	25.319	10.8
11/23/2019 01:07:54 am	25.319	10.8
11/23/2019 01:22:54 am	25.319	10.8
11/23/2019 01:37:54 am	25.319	10.8
11/23/2019 01:52:54 am	25.319	10.8
11/23/2019 02:07:54 am	25.319	10.8
11/23/2019 02:22:54 am	25.319	10.8
11/23/2019 02:37:54 am	25.319	10.8
11/23/2019 02:52:54 am	25.319	10.8
11/23/2019 03:07:54 am	25.319	10.8
11/23/2019 03:22:54 am	25.319	10.8
11/23/2019 03:37:54 am	25.319	10.8
11/23/2019 03:52:54 am	25.319	10.8
11/23/2019 04:07:54 am	25.319	10.8
11/23/2019 04:22:54 am	25.319	10.8
11/23/2019 04:37:54 am	25.319	10.8
11/23/2019 04:52:54 am	25.319	10.8
11/23/2019 05:07:54 am	25.319	10.8
11/23/2019 05:22:54 am	25.319	10.8
11/23/2019 05:37:54 am	25.319	10.8
11/23/2019 05:52:54 am	25.319	10.8
11/23/2019 06:07:54 am	25.319	10.8
11/23/2019 06:22:54 am	25.319	10.8
11/23/2019 06:37:54 am	25.222	10.8
11/23/2019 06:52:54 am	25.222	10.8
11/23/2019 07:07:54 am	25.222	10.8
11/23/2019 07:22:54 am	25.222	10.8
11/23/2019 07:37:54 am	25.319	10.8
11/23/2019 07:52:54 am	25.319	10.8
11/23/2019 08:07:54 am	25.319	10.8
11/23/2019 08:22:54 am	25.222	10.8
11/23/2019 08:37:54 am	25.222	10.8
11/23/2019 08:52:54 am	25.222	10.8
11/23/2019 09:07:54 am	25.222	10.8
11/23/2019 09:22:54 am	25.319	21.5
11/23/2019 09:37:54 am	25.319	10.8
11/23/2019 09:52:54 am	25.319	10.8
11/23/2019 10:07:54 am	25.319	10.8
11/23/2019 10:22:54 am	25.222	10.8
11/23/2019 10:37:54 am	25.222	10.8
11/23/2019 10:52:54 am	25.222	10.8
11/23/2019 11:07:54 am	25.222	10.8
11/23/2019 11:22:54 am	25.222	10.8
11/23/2019 11:37:54 am	25.222	10.8
11/23/2019 11:52:54 am	25.125	10.8
11/23/2019 12:07:54 pm	25.125	10.8
11/23/2019 12:22:54 pm	25.222	10.8
11/23/2019 12:37:54 pm	25.222	10.8
11/23/2019 12:52:54 pm	25.222	10.8
11/23/2019 01:07:54 pm	25.222	10.8
11/23/2019 01:22:54 pm	25.222	10.8
11/23/2019 01:37:54 pm	25.222	10.8
11/23/2019 01:52:54 pm	25.222	10.8
11/23/2019 02:07:54 pm	25.222	10.8
11/23/2019 02:22:54 pm	25.222	10.8
11/23/2019 02:37:54 pm	25.222	10.8
11/23/2019 02:52:54 pm	25.222	10.8
11/23/2019 03:07:54 pm	25.222	10.8
11/23/2019 03:22:54 pm	25.222	10.8
11/23/2019 03:37:54 pm	25.222	10.8
11/23/2019 03:52:54 pm	25.319	10.8
11/23/2019 04:07:54 pm	25.222	10.8
11/23/2019 04:22:54 pm	25.222	10.8
11/23/2019 04:37:54 pm	25.222	10.8
11/23/2019 04:52:54 pm	25.222	10.8
11/23/2019 05:07:54 pm	25.222	10.8
11/23/2019 05:22:54 pm	25.222	10.8
11/23/2019 05:37:54 pm	25.222	10.8
11/23/2019 05:52:54 pm	25.222	10.8
11/23/2019 06:07:54 pm	25.222	10.8
11/23/2019 06:22:54 pm	25.222	10.8
11/23/2019 06:37:54 pm	25.222	10.8
11/23/2019 06:52:54 pm	25.222	10.8
11/23/2019 07:07:54 pm	25.222	10.8
11/23/2019 07:22:54 pm	25.222	10.8
11/23/2019 07:37:54 pm	25.222	10.8
11/23/2019 07:52:54 pm	25.222	10.8
11/23/2019 08:07:54 pm	25.222	10.8
11/23/2019 08:22:54 pm	25.319	10.8
11/23/2019 08:37:54 pm	25.319	10.8
11/23/2019 08:52:54 pm	25.319	10.8
11/23/2019 09:07:54 pm	25.319	10.8
11/23/2019 09:22:54 pm	25.319	10.8
11/23/2019 09:37:54 pm	25.319	10.8
11/23/2019 09:52:54 pm	25.319	10.8
11/23/2019 10:07:54 pm	25.319	10.8
11/23/2019 10:22:54 pm	25.319	10.8
11/23/2019 10:37:54 pm	25.319	10.8
11/23/2019 10:52:54 pm	25.319	10.8
11/23/2019 11:07:54 pm	25.319	10.8
11/23/2019 11:22:54 pm	25.319	10.8
11/23/2019 11:37:54 pm	25.319	10.8
11/23/2019 11:52:54 pm	25.319	10.8
11/24/2019 12:07:54 am	25.319	10.8
11/24/2019 12:22:54 am	25.319	10.8
11/24/2019 12:37:54 am	25.319	10.8
11/24/2019 12:52:54 am	25.319	10.8
11/24/2019 01:07:54 am	25.319	10.8
11/24/2019 01:22:54 am	25.319	10.8
11/24/2019 01:37:54 am	25.319	10.8
11/24/2019 01:52:54 am	25.319	10.8
11/24/2019 02:07:54 am	25.319	10.8
11/24/2019 02:22:54 am	25.319	10.8
11/24/2019 02:37:54 am	25.319	10.8
11/24/2019 02:52:54 am	25.319	10.8
11/24/2019 03:07:54 am	25.319	10.8
11/24/2019 03:22:54 am	25.319	10.8
11/24/2019 03:37:54 am	25.319	10.8
11/24/2019 03:52:54 am	25.319	10.8
11/24/2019 04:07:54 am	25.319	10.8
11/24/2019 04:22:54 am	25.319	10.8
11/24/2019 04:37:54 am	25.319	10.8
11/24/2019 04:52:54 am	25.319	10.8
11/24/2019 05:07:54 am	25.319	10.8
11/24/2019 05:22:54 am	25.319	10.8
11/24/2019 05:37:54 am	25.319	10.8
11/24/2019 05:52:54 am	25.319	10.8
11/24/2019 06:07:54 am	25.222	10.8
11/24/2019 06:22:54 am	25.222	10.8
11/24/2019 06:37:54 am	25.222	10.8
11/24/2019 06:52:54 am	25.222	10.8
11/24/2019 07:07:54 am	25.222	10.8
11/24/2019 07:22:54 am	25.319	10.8
11/24/2019 07:37:54 am	25.222	10.8
11/24/2019 07:52:54 am	25.222	10.8
11/24/2019 08:07:54 am	25.222	10.8
11/24/2019 08:22:54 am	25.222	10.8
11/24/2019 08:37:54 am	25.222	10.8
11/24/2019 08:52:54 am	25.222	10.8
11/24/2019 09:07:54 am	25.319	10.8
11/24/2019 09:22:54 am	25.319	10.8
11/24/2019 09:37:54 am	25.319	10.8
11/24/2019 09:52:54 am	25.319	10.8
11/24/2019 10:07:54 am	25.319	10.8
11/24/2019 10:22:54 am	25.319	10.8
11/24/2019 10:37:54 am	25.222	10.8
11/24/2019 10:52:54 am	25.222	10.8
11/24/2019 11:07:54 am	25.222	10.8
11/24/2019 11:22:54 am	25.222	10.8
11/24/2019 11:37:54 am	25.222	10.8
11/24/2019 11:52:54 am	25.222	10.8
11/24/2019 12:07:54 pm	25.222	10.8
11/24/2019 12:22:54 pm	25.222	10.8
11/24/2019 12:37:54 pm	25.222	10.8
11/24/2019 12:52:54 pm	25.222	10.8
11/24/2019 01:07:54 pm	25.125	10.8
11/24/2019 01:22:54 pm	25.125	10.8
11/24/2019 01:37:54 pm	25.125	10.8
11/24/2019 01:52:54 pm	25.125	10.8
11/24/2019 02:07:54 pm	25.125	10.8
11/24/2019 02:22:54 pm	25.125	10.8
11/24/2019 02:37:54 pm	25.222	10.8
11/24/2019 02:52:54 pm	25.222	10.8
11/24/2019 03:07:54 pm	25.222	10.8
11/24/2019 03:22:54 pm	25.222	10.8
11/24/2019 03:37:54 pm	25.222	10.8
11/24/2019 03:52:54 pm	25.222	10.8
11/24/2019 04:07:54 pm	25.222	10.8
11/24/2019 04:22:54 pm	25.222	10.8
11/24/2019 04:37:54 pm	25.222	10.8
11/24/2019 04:52:54 pm	25.222	10.8
11/24/2019 05:07:54 pm	25.222	10.8
11/24/2019 05:22:54 pm	25.222	10.8
11/24/2019 05:37:54 pm	25.222	10.8
11/24/2019 05:52:54 pm	25.319	10.8
11/24/2019 06:07:54 pm	25.222	10.8
11/24/2019 06:22:54 pm	25.222	10.8
11/24/2019 06:37:54 pm	25.222	10.8
11/24/2019 06:52:54 pm	25.222	10.8
11/24/2019 07:07:54 pm	25.222	10.8
11/24/2019 07:22:54 pm	25.222	10.8
11/24/2019 07:37:54 pm	25.222	10.8
11/24/2019 07:52:54 pm	25.222	10.8
11/24/2019 08:07:54 pm	25.222	10.8
11/24/2019 08:22:54 pm	25.222	10.8
11/24/2019 08:37:54 pm	25.222	10.8
11/24/2019 08:52:54 pm	25.222	10.8
11/24/2019 09:07:54 pm	25.222	10.8
11/24/2019 09:22:54 pm	25.222	10.8
11/24/2019 09:37:54 pm	25.222	10.8
11/24/2019 09:52:54 pm	25.222	10.8
11/24/2019 10:07:54 pm	25.222	10.8
11/24/2019 10:22:54 pm	25.222	10.8
11/24/2019 10:37:54 pm	25.222	10.8
11/24/2019 10:52:54 pm	25.222	10.8
11/24/2019 11:07:54 pm	25.222	10.8
11/24/2019 11:22:54 pm	25.222	10.8
11/24/2019 11:37:54 pm	25.222	10.8
11/24/2019 11:52:54 pm	25.222	10.8
11/25/2019 12:07:54 am	25.222	10.8
11/25/2019 12:22:54 am	25.222	10.8
11/25/2019 12:37:54 am	25.222	10.8
11/25/2019 12:52:54 am	25.222	10.8
11/25/2019 01:07:54 am	25.125	10.8
11/25/2019 01:22:54 am	25.222	10.8
11/25/2019 01:37:54 am	25.222	10.8
11/25/2019 01:52:54 am	25.222	10.8
11/25/2019 02:07:54 am	25.222	10.8
11/25/2019 02:22:54 am	25.319	10.8
11/25/2019 02:37:54 am	25.319	10.8
11/25/2019 02:52:54 am	25.222	10.8
11/25/2019 03:07:54 am	25.222	10.8
11/25/2019 03:22:54 am	25.222	10.8
11/25/2019 03:37:54 am	25.222	10.8
11/25/2019 03:52:54 am	25.125	10.8
11/25/2019 04:07:54 am	25.125	10.8
11/25/2019 04:22:54 am	25.125	10.8
11/25/2019 04:37:54 am	25.125	10.8
11/25/2019 04:52:54 am	25.125	10.8
11/25/2019 05:07:54 am	25.125	10.8
11/25/2019 05:22:54 am	25.125	10.8
11/25/2019 05:37:54 am	25.125	10.8
11/25/2019 05:52:54 am	25.125	10.8
11/25/2019 06:07:54 am	25.125	10.8
11/25/2019 06:22:54 am	25.125	10.8
11/25/2019 06:37:54 am	25.125	10.8
11/25/2019 06:52:54 am	25.125	10.8
11/25/2019 07:07:54 am	25.125	10.8
11/25/2019 07:22:54 am	25.125	10.8
11/25/2019 07:37:54 am	25.222	10.8
11/25/2019 07:52:54 am	25.319	10.8
11/25/2019 08:07:54 am	25.319	10.8
11/25/2019 08:22:54 am	25.222	10.8
11/25/2019 08:37:54 am	25.222	10.8
11/25/2019 08:52:54 am	25.222	10.8
11/25/2019 09:07:54 am	25.222	10.8
11/25/2019 09:22:54 am	25.222	21.5
11/25/2019 09:37:54 am	25.222	32.3
11/25/2019 09:52:54 am	25.319	32.3
11/25/2019 10:07:54 am	25.222	32.3
11/25/2019 10:22:54 am	25.222	32.3
11/25/2019 10:37:54 am	25.222	32.3
11/25/2019 10:52:54 am	25.319	32.3
11/25/2019 11:07:54 am	25.319	32.3
11/25/2019 11:22:54 am	25.319	32.3
11/25/2019 11:37:54 am	25.319	32.3
11/25/2019 11:52:54 am	25.319	32.3
11/25/2019 12:07:54 pm	25.319	32.3
11/25/2019 12:22:54 pm	25.319	32.3
11/25/2019 12:37:54 pm	25.319	32.3
11/25/2019 12:52:54 pm	25.319	32.3
11/25/2019 01:07:54 pm	25.319	32.3
11/25/2019 01:22:54 pm	25.319	32.3
11/25/2019 01:37:54 pm	25.319	32.3
11/25/2019 01:52:54 pm	25.319	32.3
11/25/2019 02:07:54 pm	25.319	32.3
11/25/2019 02:22:54 pm	25.319	32.3
11/25/2019 02:37:54 pm	25.319	32.3
11/25/2019 02:52:54 pm	25.319	32.3
11/25/2019 03:07:54 pm	25.319	32.3
11/25/2019 03:22:54 pm	25.319	32.3
11/25/2019 03:37:54 pm	25.319	32.3
11/25/2019 03:52:54 pm	25.319	32.3
11/25/2019 04:07:54 pm	25.319	21.5
11/25/2019 04:22:54 pm	25.319	32.3
11/25/2019 04:37:54 pm	25.319	32.3
11/25/2019 04:52:54 pm	25.319	21.5
11/25/2019 05:07:54 pm	25.319	32.3
11/25/2019 05:22:54 pm	25.319	32.3
11/25/2019 05:37:54 pm	25.319	32.3
11/25/2019 05:52:54 pm	25.319	32.3
11/25/2019 06:07:54 pm	25.319	32.3
11/25/2019 06:22:54 pm	25.319	32.3
11/25/2019 06:37:54 pm	25.319	32.3
11/25/2019 06:52:54 pm	25.319	32.3
11/25/2019 07:07:54 pm	25.319	32.3
11/25/2019 07:22:54 pm	25.319	32.3
11/25/2019 07:37:54 pm	25.319	32.3
11/25/2019 07:52:54 pm	25.319	32.3
11/25/2019 08:07:54 pm	25.319	32.3
11/25/2019 08:22:54 pm	25.319	32.3
11/25/2019 08:37:54 pm	25.319	32.3
11/25/2019 08:52:54 pm	25.319	21.5
11/25/2019 09:07:54 pm	25.319	21.5
11/25/2019 09:22:54 pm	25.319	21.5
11/25/2019 09:37:54 pm	25.319	32.3
11/25/2019 09:52:54 pm	25.319	21.5
11/25/2019 10:07:54 pm	25.319	21.5
11/25/2019 10:22:54 pm	25.319	21.5
11/25/2019 10:37:54 pm	25.319	21.5
11/25/2019 10:52:54 pm	25.319	21.5
11/25/2019 11:07:54 pm	25.319	21.5
11/25/2019 11:22:54 pm	25.319	21.5
11/25/2019 11:37:54 pm	25.319	32.3
11/25/2019 11:52:54 pm	25.319	21.5
11/26/2019 12:07:54 am	25.319	21.5
11/26/2019 12:22:54 am	25.319	21.5
11/26/2019 12:37:54 am	25.319	21.5
11/26/2019 12:52:54 am	25.319	21.5
11/26/2019 01:07:54 am	25.222	21.5
11/26/2019 01:22:54 am	25.222	21.5
11/26/2019 01:37:54 am	25.319	21.5
11/26/2019 01:52:54 am	25.319	21.5
11/26/2019 02:07:54 am	25.319	21.5
11/26/2019 02:22:54 am	25.319	32.3
11/26/2019 02:37:54 am	25.319	21.5
11/26/2019 02:52:54 am	25.319	32.3
11/26/2019 03:07:54 am	25.319	21.5
11/26/2019 03:22:54 am	25.319	21.5
11/26/2019 03:37:54 am	25.319	21.5
11/26/2019 03:52:54 am	25.319	21.5
11/26/2019 04:07:54 am	25.319	21.5
11/26/2019 04:22:54 am	25.319	21.5
11/26/2019 04:37:54 am	25.222	21.5
11/26/2019 04:52:54 am	25.222	32.3
11/26/2019 05:07:54 am	25.222	32.3
11/26/2019 05:22:54 am	25.222	32.3
11/26/2019 05:37:54 am	25.222	32.3
11/26/2019 05:52:54 am	25.222	32.3
11/26/2019 06:07:54 am	25.222	32.3
11/26/2019 06:22:54 am	25.222	32.3
11/26/2019 06:37:54 am	25.222	32.3
11/26/2019 06:52:54 am	25.319	32.3
11/26/2019 07:07:54 am	25.319	32.3
11/26/2019 07:22:54 am	25.319	32.3
11/26/2019 07:37:54 am	25.222	32.3
11/26/2019 07:52:54 am	25.222	32.3
11/26/2019 08:07:54 am	25.222	32.3
11/26/2019 08:22:54 am	25.222	32.3
11/26/2019 08:37:54 am	25.222	32.3
11/26/2019 08:52:54 am	25.222	32.3
11/26/2019 09:07:54 am	25.319	32.3
11/26/2019 09:22:54 am	25.222	32.3
11/26/2019 09:37:54 am	25.222	10.8
11/26/2019 09:52:54 am	25.222	10.8
11/26/2019 10:07:54 am	25.222	10.8
11/26/2019 10:22:54 am	25.222	10.8
11/26/2019 10:37:54 am	25.125	10.8
11/26/2019 10:52:54 am	25.125	10.8
11/26/2019 11:07:54 am	25.125	10.8
11/26/2019 11:22:54 am	25.125	10.8
11/26/2019 11:37:54 am	25.125	10.8
11/26/2019 11:52:54 am	25.125	10.8
11/26/2019 12:07:54 pm	25.125	10.8
11/26/2019 12:22:54 pm	25.125	10.8
11/26/2019 12:37:54 pm	25.125	10.8
11/26/2019 12:52:54 pm	25.125	10.8
11/26/2019 01:07:54 pm	25.222	10.8
11/26/2019 01:22:54 pm	25.222	10.8
11/26/2019 01:37:54 pm	25.222	10.8
11/26/2019 01:52:54 pm	25.222	10.8
11/26/2019 02:07:54 pm	25.222	10.8
11/26/2019 02:22:54 pm	25.222	10.8
11/26/2019 02:37:54 pm	25.222	10.8
11/26/2019 02:52:54 pm	25.222	21.5
11/26/2019 03:07:54 pm	25.319	10.8
11/26/2019 03:22:54 pm	25.319	10.8
11/26/2019 03:37:54 pm	25.319	10.8
11/26/2019 03:52:54 pm	25.222	10.8
11/26/2019 04:07:54 pm	25.222	10.8
11/26/2019 04:22:54 pm	25.222	10.8
11/26/2019 04:37:54 pm	25.222	10.8
11/26/2019 04:52:54 pm	25.222	10.8
11/26/2019 05:07:54 pm	25.222	10.8
11/26/2019 05:22:54 pm	25.222	10.8
11/26/2019 05:37:54 pm	25.222	10.8
11/26/2019 05:52:54 pm	25.222	10.8
11/26/2019 06:07:54 pm	25.222	10.8
11/26/2019 06:22:54 pm	25.222	10.8
11/26/2019 06:37:54 pm	25.222	10.8
11/26/2019 06:52:54 pm	25.222	10.8
11/26/2019 07:07:54 pm	25.222	10.8
11/26/2019 07:22:54 pm	25.222	10.8
11/26/2019 07:37:54 pm	25.125	10.8
11/26/2019 07:52:54 pm	25.222	10.8
11/26/2019 08:07:54 pm	25.222	10.8
11/26/2019 08:22:54 pm	25.222	10.8
11/26/2019 08:37:54 pm	25.222	10.8
11/26/2019 08:52:54 pm	25.222	10.8
11/26/2019 09:07:54 pm	25.222	10.8
11/26/2019 09:22:54 pm	25.222	10.8
11/26/2019 09:37:54 pm	25.222	10.8
11/26/2019 09:52:54 pm	25.222	10.8
11/26/2019 10:07:54 pm	25.222	10.8
11/26/2019 10:22:54 pm	25.222	10.8
11/26/2019 10:37:54 pm	25.222	10.8
11/26/2019 10:52:54 pm	25.222	10.8
11/26/2019 11:07:54 pm	25.222	10.8
11/26/2019 11:22:54 pm	25.222	10.8
11/26/2019 11:37:54 pm	25.222	10.8
11/26/2019 11:52:54 pm	25.222	10.8
11/27/2019 12:07:54 am	25.222	10.8
11/27/2019 12:22:54 am	25.222	10.8
11/27/2019 12:37:54 am	25.222	10.8
11/27/2019 12:52:54 am	25.125	10.8
11/27/2019 01:07:54 am	25.222	10.8
11/27/2019 01:22:54 am	25.222	10.8
11/27/2019 01:37:54 am	25.222	10.8
11/27/2019 01:52:54 am	25.222	10.8
11/27/2019 02:07:54 am	25.222	10.8
11/27/2019 02:22:54 am	25.222	10.8
11/27/2019 02:37:54 am	25.125	10.8
11/27/2019 02:52:54 am	25.125	10.8
11/27/2019 03:07:54 am	25.125	10.8
11/27/2019 03:22:54 am	25.125	10.8
11/27/2019 03:37:54 am	25.125	10.8
11/27/2019 03:52:54 am	25.125	10.8
11/27/2019 04:07:54 am	25.125	10.8
11/27/2019 04:22:54 am	25.125	10.8
11/27/2019 04:37:54 am	25.125	10.8
11/27/2019 04:52:54 am	25.125	10.8
11/27/2019 05:07:54 am	25.125	10.8
11/27/2019 05:22:54 am	25.125	10.8
11/27/2019 05:37:54 am	25.125	10.8
11/27/2019 05:52:54 am	25.125	10.8
11/27/2019 06:07:54 am	25.125	10.8
11/27/2019 06:22:54 am	25.125	10.8
11/27/2019 06:37:54 am	25.125	10.8
11/27/2019 06:52:54 am	25.125	10.8
11/27/2019 07:07:54 am	25.125	10.8
11/27/2019 07:22:54 am	25.125	10.8
11/27/2019 07:37:54 am	25.125	10.8
11/27/2019 07:52:54 am	25.125	10.8
11/27/2019 08:07:54 am	25.125	10.8
11/27/2019 08:22:54 am	25.125	10.8
11/27/2019 08:37:54 am	25.125	10.8
11/27/2019 08:52:54 am	25.125	10.8
11/27/2019 09:07:54 am	25.125	10.8
11/27/2019 09:22:54 am	25.125	10.8
11/27/2019 09:37:54 am	25.222	10.8
11/27/2019 09:52:54 am	25.222	10.8
11/27/2019 10:07:54 am	25.222	10.8
11/27/2019 10:22:54 am	25.222	10.8
11/27/2019 10:37:54 am	25.222	10.8
11/27/2019 10:52:54 am	25.222	10.8
11/27/2019 11:07:54 am	25.222	10.8
11/27/2019 11:22:54 am	25.222	10.8
11/27/2019 11:37:54 am	25.222	10.8
11/27/2019 11:52:54 am	25.222	10.8
11/27/2019 12:07:54 pm	25.222	10.8
11/27/2019 12:22:54 pm	25.222	10.8
11/27/2019 12:37:54 pm	25.222	10.8
11/27/2019 12:52:54 pm	25.222	10.8
11/27/2019 01:07:54 pm	25.222	10.8
11/27/2019 01:22:54 pm	25.222	10.8
11/27/2019 01:37:54 pm	25.222	21.5
11/27/2019 01:52:54 pm	25.319	10.8
11/27/2019 02:07:54 pm	25.319	10.8
11/27/2019 02:22:54 pm	25.319	21.5
11/27/2019 02:37:54 pm	25.319	21.5
11/27/2019 02:52:54 pm	25.222	10.8
11/27/2019 03:07:54 pm	25.222	10.8
11/27/2019 03:22:54 pm	25.222	10.8
11/27/2019 03:37:54 pm	25.222	10.8
11/27/2019 03:52:54 pm	25.125	10.8
11/27/2019 04:07:54 pm	25.125	10.8
11/27/2019 04:22:54 pm	25.125	10.8
11/27/2019 04:37:54 pm	25.125	10.8
11/27/2019 04:52:54 pm	25.125	10.8
11/27/2019 05:07:54 pm	25.125	10.8
11/27/2019 05:22:54 pm	25.125	10.8
11/27/2019 05:37:54 pm	25.125	10.8
11/27/2019 05:52:54 pm	25.125	10.8
11/27/2019 06:07:54 pm	25.125	10.8
11/27/2019 06:22:54 pm	25.125	10.8
11/27/2019 06:37:54 pm	25.125	10.8
11/27/2019 06:52:54 pm	25.125	10.8
11/27/2019 07:07:54 pm	25.125	10.8
11/27/2019 07:22:54 pm	25.125	10.8
11/27/2019 07:37:54 pm	25.125	10.8
11/27/2019 07:52:54 pm	25.125	10.8
11/27/2019 08:07:54 pm	25.125	10.8
11/27/2019 08:22:54 pm	25.125	10.8
11/27/2019 08:37:54 pm	25.125	10.8
11/27/2019 08:52:54 pm	25.125	10.8
11/27/2019 09:07:54 pm	25.125	10.8
11/27/2019 09:22:54 pm	25.125	10.8
11/27/2019 09:37:54 pm	25.125	10.8
11/27/2019 09:52:54 pm	25.125	10.8
11/27/2019 10:07:54 pm	25.125	10.8
11/27/2019 10:22:54 pm	25.125	10.8
11/27/2019 10:37:54 pm	25.125	10.8
11/27/2019 10:52:54 pm	25.125	10.8
11/27/2019 11:07:54 pm	25.125	10.8
11/27/2019 11:22:54 pm	25.125	10.8
11/27/2019 11:37:54 pm	25.125	10.8
11/27/2019 11:52:54 pm	25.125	10.8
11/28/2019 12:07:54 am	25.125	10.8
11/28/2019 12:22:54 am	25.125	10.8
11/28/2019 12:37:54 am	25.125	10.8
11/28/2019 12:52:54 am	25.125	10.8
11/28/2019 01:07:54 am	25.125	10.8
11/28/2019 01:22:54 am	25.125	10.8
11/28/2019 01:37:54 am	25.125	10.8
11/28/2019 01:52:54 am	25.125	10.8
11/28/2019 02:07:54 am	25.125	10.8
11/28/2019 02:22:54 am	25.125	10.8
11/28/2019 02:37:54 am	25.125	10.8
11/28/2019 02:52:54 am	25.125	10.8
11/28/2019 03:07:54 am	25.125	10.8
11/28/2019 03:22:54 am	25.125	10.8
11/28/2019 03:37:54 am	25.125	10.8
11/28/2019 03:52:54 am	25.125	10.8
11/28/2019 04:07:54 am	25.125	10.8
11/28/2019 04:22:54 am	25.125	10.8
11/28/2019 04:37:54 am	25.125	10.8
11/28/2019 04:52:54 am	25.125	10.8
11/28/2019 05:07:54 am	25.125	10.8
11/28/2019 05:22:54 am	25.125	10.8
11/28/2019 05:37:54 am	25.125	10.8
11/28/2019 05:52:54 am	25.125	10.8
11/28/2019 06:07:54 am	25.125	10.8
11/28/2019 06:22:54 am	25.125	10.8
11/28/2019 06:37:54 am	25.125	10.8
11/28/2019 06:52:54 am	25.125	10.8
11/28/2019 07:07:54 am	25.125	10.8
11/28/2019 07:22:54 am	25.125	10.8
11/28/2019 07:37:54 am	25.125	10.8
11/28/2019 07:52:54 am	25.125	10.8
11/28/2019 08:07:54 am	25.125	10.8
11/28/2019 08:22:54 am	25.125	10.8
11/28/2019 08:37:54 am	25.222	10.8
11/28/2019 08:52:54 am	25.222	10.8
11/28/2019 09:07:54 am	25.222	10.8
11/28/2019 09:22:54 am	25.222	10.8
11/28/2019 09:37:54 am	25.222	10.8
11/28/2019 09:52:54 am	25.222	10.8
11/28/2019 10:07:54 am	25.222	10.8
11/28/2019 10:22:54 am	25.125	10.8
11/28/2019 10:37:54 am	25.125	10.8
11/28/2019 10:52:54 am	25.222	10.8
11/28/2019 11:07:54 am	25.125	10.8
11/28/2019 11:22:54 am	25.125	10.8
11/28/2019 11:37:54 am	25.125	10.8
11/28/2019 11:52:54 am	25.125	10.8
11/28/2019 12:07:54 pm	25.125	10.8
11/28/2019 12:22:54 pm	25.125	10.8
11/28/2019 12:37:54 pm	25.125	10.8
11/28/2019 12:52:54 pm	25.125	10.8
11/28/2019 01:07:54 pm	25.125	10.8
11/28/2019 01:22:54 pm	25.222	10.8
11/28/2019 01:37:54 pm	25.222	10.8
11/28/2019 01:52:54 pm	25.125	10.8
11/28/2019 02:07:54 pm	25.125	10.8
11/28/2019 02:22:54 pm	25.125	10.8
11/28/2019 02:37:54 pm	25.222	10.8
11/28/2019 02:52:54 pm	25.222	10.8
11/28/2019 03:07:54 pm	25.125	10.8
11/28/2019 03:22:54 pm	25.125	10.8
11/28/2019 03:37:54 pm	25.125	10.8
11/28/2019 03:52:54 pm	25.125	10.8
11/28/2019 04:07:54 pm	25.125	10.8
11/28/2019 04:22:54 pm	25.125	10.8
11/28/2019 04:37:54 pm	25.125	10.8
11/28/2019 04:52:54 pm	25.125	10.8
11/28/2019 05:07:54 pm	25.125	10.8
11/28/2019 05:22:54 pm	25.125	10.8
11/28/2019 05:37:54 pm	25.125	10.8
11/28/2019 05:52:54 pm	25.125	10.8
11/28/2019 06:07:54 pm	25.125	10.8
11/28/2019 06:22:54 pm	25.125	10.8
11/28/2019 06:37:54 pm	25.125	10.8
11/28/2019 06:52:54 pm	25.125	10.8
11/28/2019 07:07:54 pm	25.125	10.8
11/28/2019 07:22:54 pm	25.125	10.8
11/28/2019 07:37:54 pm	25.125	10.8
11/28/2019 07:52:54 pm	25.125	10.8
11/28/2019 08:07:54 pm	25.125	10.8
11/28/2019 08:22:54 pm	25.125	10.8
11/28/2019 08:37:54 pm	25.222	10.8
11/28/2019 08:52:54 pm	25.125	10.8
11/28/2019 09:07:54 pm	25.222	10.8
11/28/2019 09:22:54 pm	25.222	10.8
11/28/2019 09:37:54 pm	25.222	10.8
11/28/2019 09:52:54 pm	25.222	10.8
11/28/2019 10:07:54 pm	25.222	10.8
11/28/2019 10:22:54 pm	25.222	10.8
11/28/2019 10:37:54 pm	25.222	10.8
11/28/2019 10:52:54 pm	25.125	10.8
11/28/2019 11:07:54 pm	25.222	10.8
11/28/2019 11:22:54 pm	25.222	10.8
11/28/2019 11:37:54 pm	25.222	10.8
11/28/2019 11:52:54 pm	25.222	10.8
11/29/2019 12:07:54 am	25.125	10.8
11/29/2019 12:22:54 am	25.125	10.8
11/29/2019 12:37:54 am	25.125	10.8
11/29/2019 12:52:54 am	25.125	10.8
11/29/2019 01:07:54 am	25.125	10.8
11/29/2019 01:22:54 am	25.125	10.8
11/29/2019 01:37:54 am	25.125	10.8
11/29/2019 01:52:54 am	25.125	10.8
11/29/2019 02:07:54 am	25.125	10.8
11/29/2019 02:22:54 am	25.125	10.8
11/29/2019 02:37:54 am	25.125	10.8
11/29/2019 02:52:54 am	25.125	10.8
11/29/2019 03:07:54 am	25.125	10.8
11/29/2019 03:22:54 am	25.125	10.8
11/29/2019 03:37:54 am	25.125	10.8
11/29/2019 03:52:54 am	25.125	10.8
11/29/2019 04:07:54 am	25.125	10.8
11/29/2019 04:22:54 am	25.125	10.8
11/29/2019 04:37:54 am	25.125	10.8
11/29/2019 04:52:54 am	25.125	10.8
11/29/2019 05:07:54 am	25.125	10.8
11/29/2019 05:22:54 am	25.125	10.8
11/29/2019 05:37:54 am	25.125	10.8
11/29/2019 05:52:54 am	25.125	10.8
11/29/2019 06:07:54 am	25.125	10.8
11/29/2019 06:22:54 am	25.125	10.8
11/29/2019 06:37:54 am	25.222	10.8
11/29/2019 06:52:54 am	25.222	10.8
11/29/2019 07:07:54 am	25.222	10.8
11/29/2019 07:22:54 am	25.125	10.8
11/29/2019 07:37:54 am	25.125	10.8
11/29/2019 07:52:54 am	25.125	10.8
11/29/2019 08:07:54 am	25.125	10.8
11/29/2019 08:22:54 am	25.125	10.8
11/29/2019 08:37:54 am	25.125	10.8
11/29/2019 08:52:54 am	25.125	10.8
11/29/2019 09:07:54 am	25.125	10.8
11/29/2019 09:22:54 am	25.125	10.8
11/29/2019 09:37:54 am	25.222	10.8
11/29/2019 09:52:54 am	25.222	10.8
11/29/2019 10:07:54 am	25.222	10.8
11/29/2019 10:22:54 am	25.319	21.5
11/29/2019 10:37:54 am	25.319	10.8
11/29/2019 10:52:54 am	25.222	10.8
11/29/2019 11:07:54 am	25.319	10.8
11/29/2019 11:22:54 am	25.222	10.8
11/29/2019 11:37:54 am	25.222	10.8
11/29/2019 11:52:54 am	25.125	10.8
11/29/2019 12:07:54 pm	25.125	10.8
11/29/2019 12:22:54 pm	25.125	10.8
11/29/2019 12:37:54 pm	25.125	10.8
11/29/2019 12:52:54 pm	25.125	10.8
11/29/2019 01:07:54 pm	25.125	21.5
11/29/2019 01:22:54 pm	25.125	10.8
11/29/2019 01:37:54 pm	25.125	10.8
11/29/2019 01:52:54 pm	25.125	10.8
11/29/2019 02:07:54 pm	25.125	10.8
11/29/2019 02:22:54 pm	25.125	10.8
11/29/2019 02:37:54 pm	25.125	10.8
11/29/2019 02:52:54 pm	25.125	10.8
11/29/2019 03:07:54 pm	25.125	10.8
11/29/2019 03:22:54 pm	25.125	10.8
11/29/2019 03:37:54 pm	25.125	10.8
11/29/2019 03:52:54 pm	25.125	10.8
11/29/2019 04:07:54 pm	25.028	10.8
11/29/2019 04:22:54 pm	25.028	10.8
11/29/2019 04:37:54 pm	25.125	10.8
11/29/2019 04:52:54 pm	25.125	10.8
11/29/2019 05:07:54 pm	25.125	10.8
11/29/2019 05:22:54 pm	25.125	10.8
11/29/2019 05:37:54 pm	25.125	10.8
11/29/2019 05:52:54 pm	25.125	10.8
11/29/2019 06:07:54 pm	25.125	10.8
11/29/2019 06:22:54 pm	25.125	10.8
11/29/2019 06:37:54 pm	25.125	10.8
11/29/2019 06:52:54 pm	25.125	10.8
11/29/2019 07:07:54 pm	25.125	10.8
11/29/2019 07:22:54 pm	25.125	10.8
11/29/2019 07:37:54 pm	25.125	10.8
11/29/2019 07:52:54 pm	25.125	10.8
11/29/2019 08:07:54 pm	25.125	10.8
11/29/2019 08:22:54 pm	25.125	10.8
11/29/2019 08:37:54 pm	25.125	10.8
11/29/2019 08:52:54 pm	25.125	10.8
11/29/2019 09:07:54 pm	25.222	10.8
11/29/2019 09:22:54 pm	25.125	10.8
11/29/2019 09:37:54 pm	25.125	10.8
11/29/2019 09:52:54 pm	25.222	10.8
11/29/2019 10:07:54 pm	25.222	10.8
11/29/2019 10:22:54 pm	25.125	10.8
11/29/2019 10:37:54 pm	25.125	10.8
11/29/2019 10:52:54 pm	25.125	10.8
11/29/2019 11:07:54 pm	25.125	10.8
11/29/2019 11:22:54 pm	25.125	10.8
11/29/2019 11:37:54 pm	25.125	10.8
11/29/2019 11:52:54 pm	25.125	10.8
11/30/2019 12:07:54 am	25.125	10.8
11/30/2019 12:22:54 am	25.028	10.8
11/30/2019 12:37:54 am	25.125	10.8
11/30/2019 12:52:54 am	25.125	10.8
11/30/2019 01:07:54 am	25.125	10.8
11/30/2019 01:22:54 am	25.028	10.8
11/30/2019 01:37:54 am	25.125	10.8
11/30/2019 01:52:54 am	25.125	10.8
11/30/2019 02:07:54 am	25.028	10.8
11/30/2019 02:22:54 am	25.028	10.8
11/30/2019 02:37:54 am	25.028	10.8
11/30/2019 02:52:54 am	25.028	10.8
11/30/2019 03:07:54 am	25.028	10.8
11/30/2019 03:22:54 am	25.028	10.8
11/30/2019 03:37:54 am	25.028	10.8
11/30/2019 03:52:54 am	25.028	10.8
11/30/2019 04:07:54 am	25.028	10.8
11/30/2019 04:22:54 am	25.028	10.8
11/30/2019 04:37:54 am	25.028	10.8
11/30/2019 04:52:54 am	25.028	10.8
11/30/2019 05:07:54 am	25.028	10.8
11/30/2019 05:22:54 am	25.028	10.8
11/30/2019 05:37:54 am	25.028	10.8
11/30/2019 05:52:54 am	25.028	10.8
11/30/2019 06:07:54 am	25.028	10.8
11/30/2019 06:22:54 am	25.125	10.8
11/30/2019 06:37:54 am	25.028	10.8
11/30/2019 06:52:54 am	25.028	10.8
11/30/2019 07:07:54 am	25.028	10.8
11/30/2019 07:22:54 am	25.028	10.8
11/30/2019 07:37:54 am	25.028	10.8
11/30/2019 07:52:54 am	25.028	10.8
11/30/2019 08:07:54 am	25.028	10.8
11/30/2019 08:22:54 am	25.028	10.8
11/30/2019 08:37:54 am	25.125	10.8
11/30/2019 08:52:54 am	25.125	10.8
11/30/2019 09:07:54 am	25.125	10.8
11/30/2019 09:22:54 am	25.125	10.8
11/30/2019 09:37:54 am	25.125	10.8
11/30/2019 09:52:54 am	25.125	10.8
11/30/2019 10:07:54 am	25.222	10.8
11/30/2019 10:22:54 am	25.125	10.8
11/30/2019 10:37:54 am	25.125	10.8
11/30/2019 10:52:54 am	25.125	10.8
11/30/2019 11:07:54 am	25.222	10.8
11/30/2019 11:22:54 am	25.222	10.8
11/30/2019 11:37:54 am	25.222	21.5
11/30/2019 11:52:54 am	25.222	10.8
11/30/2019 12:07:54 pm	25.222	10.8
11/30/2019 12:22:54 pm	25.125	10.8
11/30/2019 12:37:54 pm	25.125	10.8
11/30/2019 12:52:54 pm	25.125	10.8
11/30/2019 01:07:54 pm	25.125	10.8
11/30/2019 01:22:54 pm	25.125	10.8
11/30/2019 01:37:54 pm	25.125	10.8
11/30/2019 01:52:54 pm	25.125	10.8
11/30/2019 02:07:54 pm	25.125	10.8
11/30/2019 02:22:54 pm	25.125	10.8
11/30/2019 02:37:54 pm	25.125	10.8
11/30/2019 02:52:54 pm	25.125	10.8
11/30/2019 03:07:54 pm	25.028	10.8
11/30/2019 03:22:54 pm	25.028	10.8
11/30/2019 03:37:54 pm	24.931	10.8
11/30/2019 03:52:54 pm	25.028	10.8
11/30/2019 04:07:54 pm	25.028	10.8
11/30/2019 04:22:54 pm	25.125	10.8
11/30/2019 04:37:54 pm	25.125	10.8
11/30/2019 04:52:54 pm	25.125	10.8
11/30/2019 05:07:54 pm	25.125	10.8
11/30/2019 05:22:54 pm	25.125	10.8
11/30/2019 05:37:54 pm	25.125	10.8
11/30/2019 05:52:54 pm	25.222	10.8
11/30/2019 06:07:54 pm	25.222	10.8
11/30/2019 06:22:54 pm	25.222	10.8
11/30/2019 06:37:54 pm	25.222	10.8
11/30/2019 06:52:54 pm	25.222	10.8
11/30/2019 07:07:54 pm	25.222	10.8
11/30/2019 07:22:54 pm	25.222	10.8
11/30/2019 07:37:54 pm	25.319	10.8
11/30/2019 07:52:54 pm	25.222	10.8
11/30/2019 08:07:54 pm	25.222	10.8
11/30/2019 08:22:54 pm	25.222	10.8
11/30/2019 08:37:54 pm	25.125	10.8
11/30/2019 08:52:54 pm	25.125	10.8
11/30/2019 09:07:54 pm	25.125	10.8
11/30/2019 09:22:54 pm	25.125	10.8
11/30/2019 09:37:54 pm	25.222	10.8
11/30/2019 09:52:54 pm	25.125	10.8
11/30/2019 10:07:54 pm	25.125	10.8
11/30/2019 10:22:54 pm	25.125	10.8
11/30/2019 10:37:54 pm	25.222	10.8
11/30/2019 10:52:54 pm	25.125	10.8
11/30/2019 11:07:54 pm	25.125	10.8
11/30/2019 11:22:54 pm	25.222	10.8
11/30/2019 11:37:54 pm	25.125	10.8
11/30/2019 11:52:54 pm	25.125	10.8
2019-01-12 00:07:54	25.125	10.8
2019-01-12 00:22:54	25.125	10.8
2019-01-12 00:37:54	25.125	10.8
2019-01-12 00:52:54	25.125	10.8
2019-01-12 01:07:54	25.125	10.8
2019-01-12 01:22:54	25.125	10.8
2019-01-12 01:37:54	25.125	10.8
2019-01-12 01:52:54	25.125	10.8
2019-01-12 02:07:54	25.125	10.8
2019-01-12 02:22:54	25.125	10.8
2019-01-12 02:37:54	25.125	10.8
2019-01-12 02:52:54	25.125	10.8
2019-01-12 03:07:54	25.125	10.8
2019-01-12 03:22:54	25.125	10.8
2019-01-12 03:37:54	25.125	10.8
2019-01-12 03:52:54	25.125	10.8
2019-01-12 04:07:54	25.125	10.8
2019-01-12 04:22:54	25.125	10.8
2019-01-12 04:37:54	25.125	10.8
2019-01-12 04:52:54	25.125	10.8
2019-01-12 05:07:54	25.125	10.8
2019-01-12 05:22:54	25.125	10.8
2019-01-12 05:37:54	25.125	10.8
2019-01-12 05:52:54	25.125	10.8
2019-01-12 06:07:54	25.125	10.8
2019-01-12 06:22:54	25.125	10.8
2019-01-12 06:37:54	25.125	10.8
2019-01-12 06:52:54	25.125	10.8
2019-01-12 07:07:54	25.028	10.8
2019-01-12 07:22:54	25.125	10.8
2019-01-12 07:37:54	25.125	10.8
2019-01-12 07:52:54	25.125	10.8
2019-01-12 08:07:54	25.125	10.8
2019-01-12 08:22:54	25.125	10.8
2019-01-12 08:37:54	25.125	10.8
2019-01-12 08:52:54	25.125	10.8
2019-01-12 09:07:54	25.125	10.8
2019-01-12 09:22:54	25.125	10.8
2019-01-12 09:37:54	25.125	10.8
2019-01-12 09:52:54	25.222	10.8
2019-01-12 10:07:54	25.125	10.8
2019-01-12 10:22:54	25.125	10.8
2019-01-12 10:37:54	25.125	10.8
2019-01-12 10:52:54	25.125	10.8
2019-01-12 11:07:54	25.125	10.8
2019-01-12 11:22:54	25.125	10.8
2019-01-12 11:37:54	25.125	10.8
2019-01-12 11:52:54	25.125	10.8
2019-01-12 12:07:54	25.125	10.8
2019-01-12 12:22:54	25.125	10.8
2019-01-12 12:37:54	25.125	10.8
2019-01-12 12:52:54	25.125	10.8
2019-01-12 13:07:54	25.125	10.8
2019-01-12 13:22:54	25.125	10.8
2019-01-12 13:37:54	25.125	10.8
2019-01-12 13:52:54	25.028	10.8
2019-01-12 14:07:54	25.028	10.8
2019-01-12 14:22:54	25.125	10.8
2019-01-12 14:37:54	25.125	10.8
2019-01-12 14:52:54	25.125	10.8
2019-01-12 15:07:54	25.125	10.8
2019-01-12 15:22:54	25.125	10.8
2019-01-12 15:37:54	25.125	10.8
2019-01-12 15:52:54	25.125	10.8
2019-01-12 16:07:54	25.222	10.8
2019-01-12 16:22:54	25.222	10.8
2019-01-12 16:37:54	25.222	10.8
2019-01-12 16:52:54	25.222	10.8
2019-01-12 17:07:54	25.319	10.8
2019-01-12 17:22:54	25.222	10.8
2019-01-12 17:37:54	25.222	10.8
2019-01-12 17:52:54	25.125	10.8
2019-01-12 18:07:54	25.125	10.8
2019-01-12 18:22:54	25.125	10.8
2019-01-12 18:37:54	25.125	10.8
2019-01-12 18:52:54	25.125	10.8
2019-01-12 19:07:54	25.125	10.8
2019-01-12 19:22:54	25.125	10.8
2019-01-12 19:37:54	25.125	10.8
2019-01-12 19:52:54	25.125	10.8
2019-01-12 20:07:54	25.125	10.8
2019-01-12 20:22:54	25.222	10.8
2019-01-12 20:37:54	25.125	10.8
2019-01-12 20:52:54	25.222	10.8
2019-01-12 21:07:54	25.222	10.8
2019-01-12 21:22:54	25.222	10.8
2019-01-12 21:37:54	25.125	10.8
2019-01-12 21:52:54	25.222	10.8
2019-01-12 22:07:54	25.222	10.8
2019-01-12 22:22:54	25.222	10.8
2019-01-12 22:37:54	25.125	10.8
2019-01-12 22:52:54	25.125	10.8
2019-01-12 23:07:54	25.125	10.8
2019-01-12 23:22:54	25.125	10.8
2019-01-12 23:37:54	25.125	10.8
2019-01-12 23:52:54	25.125	10.8
2019-02-12 00:07:54	25.125	10.8
2019-02-12 00:22:54	25.125	10.8
2019-02-12 00:37:54	25.125	10.8
2019-02-12 00:52:54	25.125	10.8
2019-02-12 01:07:54	25.125	10.8
2019-02-12 01:22:54	25.125	10.8
2019-02-12 01:37:54	25.125	10.8
2019-02-12 01:52:54	25.222	10.8
2019-02-12 02:07:54	25.222	10.8
2019-02-12 02:22:54	25.125	10.8
2019-02-12 02:37:54	25.125	10.8
2019-02-12 02:52:54	25.125	10.8
2019-02-12 03:07:54	25.125	10.8
2019-02-12 03:22:54	25.125	10.8
2019-02-12 03:37:54	25.125	10.8
2019-02-12 03:52:54	25.125	10.8
2019-02-12 04:07:54	25.125	10.8
2019-02-12 04:22:54	25.125	10.8
2019-02-12 04:37:54	25.125	10.8
2019-02-12 04:52:54	25.222	10.8
2019-02-12 05:07:54	25.125	10.8
2019-02-12 05:22:54	25.125	10.8
2019-02-12 05:37:54	25.125	10.8
2019-02-12 05:52:54	25.125	10.8
2019-02-12 06:07:54	25.125	10.8
2019-02-12 06:22:54	25.125	10.8
2019-02-12 06:37:54	25.125	10.8
2019-02-12 06:52:54	25.125	10.8
2019-02-12 07:07:54	25.125	10.8
2019-02-12 07:22:54	25.125	10.8
2019-02-12 07:37:54	25.125	10.8
2019-02-12 07:52:54	25.125	10.8
2019-02-12 08:07:54	25.125	10.8
2019-02-12 08:22:54	25.125	10.8
2019-02-12 08:37:54	24.931	10.8
2019-02-12 08:52:54	25.028	10.8
2019-02-12 09:07:54	25.028	10.8
2019-02-12 09:22:54	25.028	32.3
2019-02-12 09:37:54	25.125	32.3
2019-02-12 09:52:54	25.222	32.3
2019-02-12 10:07:54	25.319	32.3
2019-02-12 10:22:54	25.319	32.3
2019-02-12 10:37:54	25.416	32.3
2019-02-12 10:52:54	25.416	32.3
2019-02-12 11:07:54	25.416	32.3
2019-02-12 11:22:54	25.416	32.3
2019-02-12 11:37:54	25.416	32.3
2019-02-12 11:52:54	25.416	21.5
2019-02-12 12:07:54	25.416	32.3
2019-02-12 12:22:54	25.319	32.3
2019-02-12 12:37:54	25.319	32.3
2019-02-12 12:52:54	25.319	32.3
2019-02-12 13:07:54	25.319	32.3
2019-02-12 13:22:54	25.319	32.3
2019-02-12 13:37:54	25.319	32.3
2019-02-12 13:52:54	25.319	32.3
2019-02-12 14:07:54	25.319	32.3
2019-02-12 14:22:54	25.319	32.3
2019-02-12 14:37:54	25.222	32.3
2019-02-12 14:52:54	25.222	32.3
2019-02-12 15:07:54	25.222	32.3
2019-02-12 15:22:54	25.319	32.3
2019-02-12 15:37:54	25.319	32.3
2019-02-12 15:52:54	25.319	32.3
2019-02-12 16:07:54	25.319	32.3
2019-02-12 16:22:54	25.319	10.8
2019-02-12 16:37:54	25.222	10.8
2019-02-12 16:52:54	25.319	10.8
2019-02-12 17:07:54	25.319	10.8
2019-02-12 17:22:54	25.319	10.8
2019-02-12 17:37:54	25.319	10.8
2019-02-12 17:52:54	25.319	10.8
2019-02-12 18:07:54	25.319	10.8
2019-02-12 18:22:54	25.416	10.8
2019-02-12 18:37:54	25.319	10.8
2019-02-12 18:52:54	25.319	10.8

## Sheet: Video_d1
SC	Replicat
	1	2	3	4	5	6	7	8
Av. Speed (mm/s)	0.203319	3.83132	2.11614	3.12501	3.27328	33.2512	21.4012	6.90407
Mob. Av. Speed (mm/s)	2.07854	6.81853	4.12024	5.97593	4.66276	34.3812	26.12	10.6894
Av. Accel (mm/s^2)	1.18467	7.07936	6.29067	7.86154	8.99524	43.8924	47.2968	9.90013
Mobility Rate (%)	0.0465582	0.543446	0.472652	0.498933	0.68063	0.966157	0.816836	0.635877
Visible Frames	7500	7473	7500	7500	7500	7391	7500	7474
Visible Time (m:s)	0:05:00	0:04:58.920000	0:05:00	0:05:00	0:05:00	0:04:55.640000	0:05:00	0:04:58.960000
Invisible Frames	0	27	0	0	0	109	0	26
Invisible Time (m:s)	0:00:00	0:00:01.080000	0:00:00	0:00:00	0:00:00	0:00:04.360000	0:00:00	0:00:01.040000
First Visible Frame	7500	7500	7500	7500	7500	7500	7500	7500
Last Visible Frame	14999	14999	14999	14999	14999	14999	14999	14999
Visibility Rate (%)	1	0.9964	1	1	1	0.985467	1	0.996533
Invisibility Rate (%)	0	0.0036	0	0	0	0.0145333	0	0.00346667
Explored Areas	1	4	4	5	4	4	6	4
Number of Areas	4	9	9	9	9	9	9	9
Exploration Rate (%)	0.25	0.444444	0.444444	0.555556	0.444444	0.444444	0.666667	0.444444
Total Distance (mm)	76.8154	1183.04	667.015	971.027	1020.52	10023.4	6475.5	2090.4
Transitions In	0	0	0	0	0	0	0	0
Transitions Out	0	0	0	0	0	0	0	0
Frozen Events	2	8	14	8	11	1	3	6
Tot. Time Frozen (m:s)	0:04:55.480000	0:02:34.720000	0:03:29.360000	0:02:41.840000	0:01:39.160000	0:00:03.840000	0:00:18.320000	0:01:56.440000
Avg. Time Frozen (m:s)	0:02:27.740000	0:00:19.340000	0:00:14.954000	0:00:20.230000	0:00:09.015000	0:00:03.840000	0:00:06.107000	0:00:19.407000
NC	Replicat
	1	2	3	4	5	6	7	8
Av. Speed (mm/s)	22.2032	5.29497	17.4958	9.51976	13.7778	40.1956	31.1568	1.49978
Mob. Av. Speed (mm/s)	28.2761	6.79158	19.2175	12.5399	17.0885	41.9012	32.3923	5.14626
Av. Accel (mm/s^2)	30.0602	12.0373	28.5053	16.8548	33.562	49.4203	30.5473	4.97269
Mobility Rate (%)	0.782817	0.763741	0.907643	0.752001	0.802161	0.950979	0.961179	0.265608
Visible Frames	7500	7500	7475	7500	7500	6287	7500	7500
Visible Time (m:s)	0:05:00	0:05:00	0:04:59	0:05:00	0:05:00	0:04:11.480000	0:05:00	0:05:00
Invisible Frames	0	0	25	0	0	1213	0	0
Invisible Time (m:s)	0:00:00	0:00:00	0:00:01	0:00:00	0:00:00	0:00:48.520000	0:00:00	0:00:00
First Visible Frame	7500	7500	7500	7500	7500	7500	7500	7500
Last Visible Frame	14999	14999	14999	14999	14999	14999	14999	14999
Visibility Rate (%)	1	1	0.996667	1	1	0.838267	1	1
Invisibility Rate (%)	0	0	0.00333333	0	0	0.161733	0	0
Explored Areas	4	4	7	4	4	4	4	4
Number of Areas	9	9	9	9	9	9	9	9
Exploration Rate (%)	0.444444	0.444444	0.777778	0.444444	0.444444	0.444444	0.444444	0.444444
Total Distance (mm)	6687.14	1641.72	5282.98	2903.08	4189.04	12164.2	9367.89	486.22
Transitions In	0	0	0	0	0	0	0	0
Transitions Out	0	0	0	0	0	0	0	0
Frozen Events	9	6	2	7	5	1	1	7
Tot. Time Frozen (m:s)	0:00:55.320000	0:00:55.320000	0:00:14.600000	0:01:14.360000	0:00:35.400000	0:00:10.040000	0:00:04.480000	0:04:10.320000
Avg. Time Frozen (m:s)	0:00:06.147000	0:00:09.220000	0:00:07.300000	0:00:10.623000	0:00:07.080000	0:00:10.040000	0:00:04.480000	0:00:35.760000
PC	Replicat
	1	2	3	4	5	6	7	8
Av. Speed (mm/s)	0.191465	21.9128	0.531809	2.10811		0.330507	0.257413	1.13124
Mob. Av. Speed (mm/s)	1.40641	27.5668	3.08953	6.36422		1.78905	1.73534	3.53573
Av. Accel (mm/s^2)	1.34857	33.4103	2.39225	6.0473		1.93837	1.39674	3.03258
Mobility Rate (%)	0.0596318	0.791489	0.0865795	0.302428		0.0805763	0.0265475	0.266409
Visible Frames	7500	7500	7500	7500		7500	7500	7500
Visible Time (m:s)	0:05:00	0:05:00	0:05:00	0:05:00		0:05:00	0:05:00	0:05:00
Invisible Frames	0	0	0	0		0	0	0
Invisible Time (m:s)	0:00:00	0:00:00	0:00:00	0:00:00		0:00:00	0:00:00	0:00:00
First Visible Frame	7500	7500	7500	7500		7500	7500	7500
Last Visible Frame	14999	14999	14999	14999		14999	14999	14999
Visibility Rate (%)	1	1	1	1		1	1	1
Invisibility Rate (%)	0	0	0	0		0	0	0
Explored Areas	1	4	2	4		1	1	4
Number of Areas	9	9	9	9		9	9	9
Exploration Rate (%)	0.111111	0.444444	0.222222	0.444444		0.111111	0.111111	0.444444
Total Distance (mm)	72.5801	6644.84	200.147	667.282		142.399	105.266	364.504
Transitions In	0	0	0	0		0	0	0
Transitions Out	0	0	0	0		0	0	0
Frozen Events	1	8	3	6		3	1	9
Tot. Time Frozen (m:s)	0:04:59.960000	0:01:06.400000	0:04:47.680000	0:03:59.280000		0:04:57.760000	0:04:59.960000	0:04:10.880000
Avg. Time Frozen (m:s)	0:04:59.960000	0:00:08.300000	0:01:35.893000	0:00:39.880000		0:01:39.253000	0:04:59.960000	0:00:27.876000
0.4 g/L	Replicat
	1	2	3	4	5	6	7	8
Av. Speed (mm/s)	2.66844	22.68	10.8528	17.0758	1.8047	1.05663	1.26351	8.4485
Mob. Av. Speed (mm/s)	7.11469	23.5222	13.635	20.1055	2.92902	2.83271	3.08008	10.5236
Av. Accel (mm/s^2)	7.76431	34.016	24.7495	34.7516	6.06792	3.64031	4.31049	17.5658
Mobility Rate (%)	0.360993	0.963314	0.78848	0.846718	0.56897	0.322038	0.330843	0.794824
Visible Frames	7500	7500	7469	7500	7500	7500	7500	7500
Visible Time (m:s)	0:05:00	0:05:00	0:04:58.760000	0:05:00	0:05:00	0:05:00	0:05:00	0:05:00
Invisible Frames	0	0	31	0	0	0	0	0
Invisible Time (m:s)	0:00:00	0:00:00	0:00:01.240000	0:00:00	0:00:00	0:00:00	0:00:00	0:00:00
First Visible Frame	7500	7500	7500	7500	7500	7500	7500	7500
Last Visible Frame	14999	14999	14999	14999	14999	14999	14999	14999
Visibility Rate (%)	1	1	0.995867	1	1	1	1	1
Invisibility Rate (%)	0	0	0.00413333	0	0	0	0	0
Explored Areas	4	4	7	7	4	4	4	6
Number of Areas	9	9	9	9	9	9	9	9
Exploration Rate (%)	0.444444	0.444444	0.777778	0.777778	0.444444	0.444444	0.444444	0.666667
Total Distance (mm)	827.998	6835.85	3297.3	5154.09	590.725	364.385	423.394	2572.17
Transitions In	0	0	0	0	0	0	0	0
Transitions Out	0	0	0	0	0	0	0	0
Frozen Events	11	0	7	6	9	11	12	6
Tot. Time Frozen (m:s)	0:03:39	0:00:00	0:01:07.760000	0:00:27.160000	0:02:06.080000	0:04:08.040000	0:04:12.040000	0:00:44.520000
Avg. Time Frozen (m:s)	0:00:19.909000	0:00:00	0:00:09.680000	0:00:04.527000	0:00:14.009000	0:00:22.549000	0:00:21.003000	0:00:07.420000
1 g/L	Replicat
	1	2	3	4	5	6	7	8
Av. Speed (mm/s)	2.74054	2.86132	33.7387	12.2212	15.4776	6.62677	3.1129	2.00254
Mob. Av. Speed (mm/s)	3.29187	3.496	35.0048	13.8658	17.8962	8.71319	5.98555	7.62501
Av. Accel (mm/s^2)	7.59009	8.1028	43.1192	22.7267	26.2661	12.6955	5.86485	6.41704
Mobility Rate (%)	0.797635	0.784952	0.963447	0.877268	0.857084	0.749665	0.505336	0.242796
Visible Frames	7446	7500	7500	7500	7232	7474	7500	7500
Visible Time (m:s)	0:04:57.840000	0:05:00	0:05:00	0:05:00	0:04:49.280000	0:04:58.960000	0:05:00	0:05:00
Invisible Frames	54	0	0	0	268	26	0	0
Invisible Time (m:s)	0:00:02.160000	0:00:00	0:00:00	0:00:00	0:00:10.720000	0:00:01.040000	0:00:00	0:00:00
First Visible Frame	7500	7500	7500	7500	7500	7500	7500	7500
Last Visible Frame	14999	14999	14999	14999	14999	14999	14999	14999
Visibility Rate (%)	0.9928	1	1	1	0.964267	0.996533	1	1
Invisibility Rate (%)	0.0072	0	0	0	0.0357333	0.00346667	0	0
Explored Areas	4	4	8	8	4	6	6	3
Number of Areas	9	9	9	9	9	9	9	9
Exploration Rate (%)	0.444444	0.444444	0.888889	0.888889	0.444444	0.666667	0.666667	0.333333
Total Distance (mm)	888.733	922.096	10154.5	3695.05	4676.69	2013.11	957.667	635.914
Transitions In	0	0	0	0	0	0	0	0
Transitions Out	0	0	0	0	0	0	0	0
Frozen Events	7	8	1	5	5	9	2	10
Tot. Time Frozen (m:s)	0:00:40.240000	0:00:44.920000	0:00:05.400000	0:00:36.200000	0:00:37.400000	0:01:11.480000	0:02:32.680000	0:04:11.400000
Avg. Time Frozen (m:s)	0:00:05.749000	0:00:05.615000	0:00:05.400000	0:00:07.240000	0:00:07.480000	0:00:07.942000	0:01:16.340000	0:00:25.140000
2.5 g/L	Replicat
	1	2	3	4	5	6	7	8
Av. Speed (mm/s)	12.8263	2.26173	22.4702	29.0921	2.04398	29.1084	10.1918	25.1692
Mob. Av. Speed (mm/s)	15.3106	3.19678	23.4817	29.7932	5.06765	30.4443	12.8103	26.3318
Av. Accel (mm/s^2)	22.9501	6.27788	41.5526	49.9737	5.58508	34.1304	18.7766	39.2536
Mobility Rate (%)	0.833911	0.66059	0.955794	0.975987	0.377535	0.953524	0.790021	0.955043
Visible Frames	7500	7464	7469	7500	7500	7169	7500	7500
Visible Time (m:s)	0:05:00	0:04:58.560000	0:04:58.760000	0:05:00	0:05:00	0:04:46.760000	0:05:00	0:05:00
Invisible Frames	0	36	31	0	0	331	0	0
Invisible Time (m:s)	0:00:00	0:00:01.440000	0:00:01.240000	0:00:00	0:00:00	0:00:13.240000	0:00:00	0:00:00
First Visible Frame	7500	7500	7500	7500	7500	7500	7500	7500
Last Visible Frame	14999	14999	14999	14999	14999	14999	14999	14999
Visibility Rate (%)	1	0.9952	0.995867	1	1	0.955867	1	1
Invisibility Rate (%)	0	0.0048	0.00413333	0	0	0.0441333	0	0
Explored Areas	6	4	7	7	4	4	5	8
Number of Areas	9	9	9	9	9	9	9	9
Exploration Rate (%)	0.666667	0.444444	0.777778	0.777778	0.444444	0.444444	0.555556	0.888889
Total Distance (mm)	3887.02	722.043	6779.41	8787.97	638.281	8762.08	3092.53	7581.96
Transitions In	0	0	0	0	0	0	0	0
Transitions Out	0	0	0	0	0	0	0	0
Frozen Events	8	12	2	0	13	3	5	2
Tot. Time Frozen (m:s)	0:00:45.880000	0:02:30.760000	0:00:08.520000	0:00:00	0:03:23.840000	0:00:11.600000	0:00:57.840000	0:00:07.680000
Avg. Time Frozen (m:s)	0:00:05.735000	0:00:12.563000	0:00:04.260000	0:00:00	0:00:15.680000	0:00:03.867000	0:00:11.568000	0:00:03.840000
6.25 g/L	Replicat
	1	2	3	4	5	6	7	8
Av. Speed (mm/s)	26.7058	0.890606	32.462	3.01227	2.85129	4.69823	2.03313	5.08319
Mob. Av. Speed (mm/s)	27.1771	2.27864	35.0893	4.90738	5.7484	6.97358	3.803	12.7873
Av. Accel (mm/s^2)	26.2716	3.92335	33.6964	7.04779	5.56137	9.1675	6.31896	7.68082
Mobility Rate (%)	0.98158	0.294157	0.923942	0.58818	0.462539	0.657417	0.498533	0.38127
Visible Frames	7170	7500	7472	7500	7385	7500	7500	7500
Visible Time (m:s)	0:04:46.800000	0:05:00	0:04:58.880000	0:05:00	0:04:55.400000	0:05:00	0:05:00	0:05:00
Invisible Frames	330	0	28	0	115	0	0	0
Invisible Time (m:s)	0:00:13.200000	0:00:00	0:00:01.120000	0:00:00	0:00:04.600000	0:00:00	0:00:00	0:00:00
First Visible Frame	7500	7500	7500	7500	7500	7500	7500	7500
Last Visible Frame	14999	14999	14999	14999	14999	14999	14999	14999
Visibility Rate (%)	0.956	1	0.996267	1	0.984667	1	1	1
Invisibility Rate (%)	0.044	0	0.00373333	0	0.0153333	0	0	0
Explored Areas	4	3	8	4	4	4	5	6
Number of Areas	9	9	9	9	9	9	9	9
Exploration Rate (%)	0.444444	0.333333	0.888889	0.444444	0.444444	0.444444	0.555556	0.666667
Total Distance (mm)	8044.22	307.046	9804.88	931.837	882.905	1464.84	657.104	1573.34
Transitions In	0	0	0	0	0	0	0	0
Transitions Out	0	0	0	0	0	0	0	0
Frozen Events	0	13	3	17	11	12	18	9
Tot. Time Frozen (m:s)	0:00:00	0:04:33.720000	0:00:23	0:02:39.680000	0:03:00.640000	0:02:13.760000	0:03:29.920000	0:03:37.960000
Avg. Time Frozen (m:s)	0:00:00	0:00:21.055000	0:00:07.667000	0:00:09.393000	0:00:16.422000	0:00:11.147000	0:00:11.662000	0:00:24.218000
15.6 g/L	Replicat
	1	2	3	4	5	6	7	8
Av. Speed (mm/s)	1.715	40.4113	17.7335	3.89962	31.3461	25.7348	0.128206	3.09416
Mob. Av. Speed (mm/s)	4.99431	42.6768	22.118	5.21682	33.109	26.4738	1.18077	6.09702
Av. Accel (mm/s^2)	3.94175	42.2844	31.5184	8.55547	53.6568	37.7724	0.981544	8.85201
Mobility Rate (%)	0.320838	0.944097	0.799093	0.73034	0.943625	0.971451	0.0209445	0.479322
Visible Frames	7500	7195	7500	7443	7188	7500	7500	7500
Visible Time (m:s)	0:05:00	0:04:47.800000	0:05:00	0:04:57.720000	0:04:47.520000	0:05:00	0:05:00	0:05:00
Invisible Frames	0	305	0	57	312	0	0	0
Invisible Time (m:s)	0:00:00	0:00:12.200000	0:00:00	0:00:02.280000	0:00:12.480000	0:00:00	0:00:00	0:00:00
First Visible Frame	7500	7500	7500	7500	7500	7500	7500	7500
Last Visible Frame	14999	14999	14999	14999	14999	14999	14999	14999
Visibility Rate (%)	1	0.959333	1	0.9924	0.9584	1	1	1
Invisibility Rate (%)	0	0.0406667	0	0.0076	0.0416	0	0	0
Explored Areas	4	6	4	4	4	4	1	7
Number of Areas	9	9	9	9	9	9	9	9
Exploration Rate (%)	0.444444	0.666667	0.444444	0.444444	0.444444	0.444444	0.111111	0.777778
Total Distance (mm)	545.25	12191.4	5349.28	1214.78	9504.57	7751.51	51.8782	1006.45
Transitions In	0	0	0	0	0	0	0	0
Transitions Out	0	0	0	0	0	0	0	0
Frozen Events	12	2	5	6	2	1	1	15
Tot. Time Frozen (m:s)	0:03:58	0:00:07.800000	0:00:36.840000	0:01:33.480000	0:00:12.360000	0:00:03.280000	0:04:59.960000	0:02:59.880000
Avg. Time Frozen (m:s)	0:00:19.833000	0:00:03.900000	0:00:07.368000	0:00:15.580000	0:00:06.180000	0:00:03.280000	0:04:59.960000	0:00:11.992000

## Sheet: Video_d3
SC	Replicat
	1	2	3	4	5	6	7	8
Av. Speed (mm/s)	31.6933	6.42668	36.4073	4.78078	25.2966	31.1968	16.8558	3.63819
Mob. Av. Speed (mm/s)	33.2906	9.86212	41.2653	8.58605	27.5468	32.4958	20.0328	5.57634
Av. Accel (mm/s^2)	43.6864	13.3882	36.6831	10.5652	40.5396	42.4725	31.9585	6.71979
Mobility Rate (%)	0.949835	0.63556	0.877268	0.54469	0.916409	0.958345	0.83485	0.630612
Visible Frames	7260	7473	7223	7500	7445	7302	7367	7465
Visible Time (m:s)	0:04:50.400000	0:04:58.920000	0:04:48.920000	0:05:00	0:04:57.800000	0:04:52.080000	0:04:54.680000	0:04:58.600000
Invisible Frames	240	27	277	0	55	198	133	35
Invisible Time (m:s)	0:00:09.600000	0:00:01.080000	0:00:11.080000	0:00:00	0:00:02.200000	0:00:07.920000	0:00:05.320000	0:00:01.400000
First Visible Frame	7500	7500	7500	7500	7500	7500	7500	7500
Last Visible Frame	14999	14999	14999	14999	14999	14999	14999	14999
Visibility Rate (%)	0.968	0.9964	0.963067	1	0.992667	0.9736	0.982267	0.995333
Invisibility Rate (%)	0.032	0.0036	0.0369333	0	0.00733333	0.0264	0.0177333	0.00466667
Explored Areas	4	4	6	4	4	4	4	6
Number of Areas	9	9	9	9	9	9	9	9
Exploration Rate (%)	0.444444	0.444444	0.666667	0.444444	0.444444	0.444444	0.444444	0.666667
Total Distance (mm)	9551.39	1964.56	10983.8	1466.9	7625.38	9406.36	5088.14	1114.9
Transitions In	0	0	0	0	0	0	0	0
Transitions Out	0	0	0	0	0	0	0	0
Frozen Events	0	16	2	9	4	1	5	14
Tot. Time Frozen (m:s)	0:00:00	0:02:06	0:00:32.400000	0:02:18.760000	0:00:19.720000	0:00:05.360000	0:00:19.800000	0:02:07.240000
Avg. Time Frozen (m:s)	0:00:00	0:00:07.875000	0:00:16.200000	0:00:15.418000	0:00:04.930000	0:00:05.360000	0:00:03.960000	0:00:09.089000
NC	Replicat
	1	2	3	4	5	6	7	8
Av. Speed (mm/s)	7.82536	3.52711	6.28481	1.52923	29.0358	8.77245	2.67159	1.28565
Mob. Av. Speed (mm/s)	18.8184	6.07859	11.737	5.87708	32.7969	13.603	4.59002	3.3845
Av. Accel (mm/s^2)	13.5333	9.19742	12.8039	3.87035	44.9013	14.5373	8.36127	4.46248
Mobility Rate (%)	0.409152	0.556964	0.523613	0.223986	0.883033	0.630586	0.545491	0.332978
Visible Frames	7500	7500	7500	7500	7442	7321	7500	7500
Visible Time (m:s)	0:05:00	0:05:00	0:05:00	0:05:00	0:04:57.680000	0:04:52.840000	0:05:00	0:05:00
Invisible Frames	0	0	0	0	58	179	0	0
Invisible Time (m:s)	0:00:00	0:00:00	0:00:00	0:00:00	0:00:02.320000	0:00:07.160000	0:00:00	0:00:00
First Visible Frame	7500	7500	7500	7500	7500	7500	7500	7500
Last Visible Frame	14999	14999	14999	14999	14999	14999	14999	14999
Visibility Rate (%)	1	1	1	1	0.992267	0.976133	1	1
Invisibility Rate (%)	0	0	0	0	0.00773333	0.0238667	0	0
Explored Areas	7	4	4	4	4	4	4	2
Number of Areas	9	9	9	9	9	9	9	9
Exploration Rate (%)	0.777778	0.444444	0.444444	0.444444	0.444444	0.444444	0.444444	0.222222
Total Distance (mm)	2376.65	1091.68	1937.42	504.341	8784.83	2655.13	839.253	432.21
Transitions In	0	0	0	0	0	0	0	0
Transitions Out	0	0	0	0	0	0	0	0
Frozen Events	10	11	18	7	4	11	16	10
Tot. Time Frozen (m:s)	0:03:06.440000	0:02:31.400000	0:02:52.280000	0:04:16.560000	0:00:21.880000	0:01:50.040000	0:02:56.200000	0:04:17.960000
Avg. Time Frozen (m:s)	0:00:18.644000	0:00:13.764000	0:00:09.571000	0:00:36.651000	0:00:05.470000	0:00:10.004000	0:00:11.013000	0:00:25.796000
PC	Replicat
	1	2	3	4	5	6	7	8
Av. Speed (mm/s)		1.02671					2.03006	0.135253
Mob. Av. Speed (mm/s)		3.64942					4.58335	1.0925
Av. Accel (mm/s^2)		3.17547					5.54046	0.916812
Mobility Rate (%)		0.248666					0.425427	0.00253469
Visible Frames		7500					7500	7500
Visible Time (m:s)		0:05:00					0:05:00	0:05:00
Invisible Frames		0					0	0
Invisible Time (m:s)		0:00:00					0:00:00	0:00:00
First Visible Frame		7500					7500	7500
Last Visible Frame		14999					14999	14999
Visibility Rate (%)		1					1	1
Invisibility Rate (%)		0					0	0
Explored Areas		4					6	1
Number of Areas		9					9	9
Exploration Rate (%)		0.444444					0.666667	0.111111
Total Distance (mm)		349.066					650.765	57.7274
Transitions In		0					0	0
Transitions Out		0					0	0
Frozen Events		3					9	1
Tot. Time Frozen (m:s)		0:04:17.520000					0:03:25.280000	0:04:59.960000
Avg. Time Frozen (m:s)		0:01:25.840000					0:00:22.809000	0:04:59.960000
0.4 g/L	Replicat
	1	2	3	4	5	6	7	8
Av. Speed (mm/s)	21.3831	20.6618	22.8963	19.9846	0.880862	11.0083	29.2742	10.3958
Mob. Av. Speed (mm/s)	29.8378	22.4018	24.7113	25.6051	3.29227	13.7693	31.7515	12.6252
Av. Accel (mm/s^2)	36.9849	28.7784	54.1061	43.3223	3.79508	24.824	47.8547	24.2673
Mobility Rate (%)	0.710654	0.917717	0.925027	0.775395	0.220518	0.791915	0.920758	0.81555
Visible Frames	7400	7223	7500	7417	7500	7400	7500	7464
Visible Time (m:s)	0:04:56	0:04:48.920000	0:05:00	0:04:56.680000	0:05:00	0:04:56	0:05:00	0:04:58.560000
Invisible Frames	100	277	0	83	0	100	0	36
Invisible Time (m:s)	0:00:04	0:00:11.080000	0:00:00	0:00:03.320000	0:00:00	0:00:04	0:00:00	0:00:01.440000
First Visible Frame	7500	7500	7500	7500	7500	7500	7500	7500
Last Visible Frame	14999	14999	14999	14999	14999	14999	14999	14999
Visibility Rate (%)	0.986667	0.963067	1	0.988933	1	0.986667	1	0.9952
Invisibility Rate (%)	0.0133333	0.0369333	0	0.0110667	0	0.0133333	0	0.0048
Explored Areas	7	6	6	4	4	4	7	4
Number of Areas	9	9	9	9	9	9	9	9
Exploration Rate (%)	0.777778	0.666667	0.666667	0.444444	0.444444	0.444444	0.777778	0.444444
Total Distance (mm)	6493.54	6227.5	6924.88	6047.4	300.156	3336.64	8827.35	3174.85
Transitions In	0	0	0	0	0	0	0	0
Transitions Out	0	0	0	0	0	0	0	0
Frozen Events	8	1	1	8	10	7	1	4
Tot. Time Frozen (m:s)	0:01:20.680000	0:00:03.960000	0:00:08.640000	0:01:00.360000	0:04:37.080000	0:00:43.280000	0:00:04.720000	0:00:23.280000
Avg. Time Frozen (m:s)	0:00:10.085000	0:00:03.960000	0:00:08.640000	0:00:07.545000	0:00:27.708000	0:00:06.183000	0:00:04.720000	0:00:05.820000
1 g/L	Replicat
	1	2	3	4	5	6	7	8
Av. Speed (mm/s)	0.430922	0.396518	33.3379	16.8392	8.95062	7.76333	3.20222	0.45357
Mob. Av. Speed (mm/s)	1.81237	2.63602	35.2272	23.2624	10.7095	9.79934	5.59712	1.97211
Av. Accel (mm/s^2)	2.38292	1.7173	43.3353	27.3692	13.6852	16.1394	5.8726	2.31504
Mobility Rate (%)	0.155416	0.0915155	0.945704	0.719317	0.821229	0.77938	0.552161	0.103789
Visible Frames	7500	7500	7500	7500	7164	7356	7500	7500
Visible Time (m:s)	0:05:00	0:05:00	0:05:00	0:05:00	0:04:46.560000	0:04:54.240000	0:05:00	0:05:00
Invisible Frames	0	0	0	0	336	144	0	0
Invisible Time (m:s)	0:00:00	0:00:00	0:00:00	0:00:00	0:00:13.440000	0:00:05.760000	0:00:00	0:00:00
First Visible Frame	7500	7500	7500	7500	7500	7500	7500	7500
Last Visible Frame	14999	14999	14999	14999	14999	14999	14999	14999
Visibility Rate (%)	1	1	1	1	0.9552	0.9808	1	1
Invisibility Rate (%)	0	0	0	0	0.0448	0.0192	0	0
Explored Areas	1	2	7	4	4	4	6	2
Number of Areas	9	9	9	9	9	9	9	9
Exploration Rate (%)	0.111111	0.222222	0.777778	0.444444	0.444444	0.444444	0.666667	0.222222
Total Distance (mm)	166.88	143.879	10030.6	5075.03	2703.01	2364.65	978.817	187.352
Transitions In	0	0	0	0	0	0	0	0
Transitions Out	0	0	0	0	0	0	0	0
Frozen Events	5	7	3	14	8	7	8	8
Tot. Time Frozen (m:s)	0:04:51.320000	0:04:50.440000	0:00:11.880000	0:01:26.920000	0:00:45.640000	0:00:46.080000	0:02:28.560000	0:04:49.800000
Avg. Time Frozen (m:s)	0:00:58.264000	0:00:41.491000	0:00:03.960000	0:00:06.209000	0:00:05.705000	0:00:06.583000	0:00:18.570000	0:00:36.225000
2.5 g/L	Replicat
	1	2	3	4	5	6	7	8
Av. Speed (mm/s)	40.974	0.814649	2.43821	0.299465	0.785844	20.2405	10.24	1.87495
Mob. Av. Speed (mm/s)	41.6257	3.16512	5.67357	1.63658	4.8969	23.7506	14.1001	5.60262
Av. Accel (mm/s^2)	46.9152	2.90271	6.71237	1.77904	3.11196	41.4134	21.0763	5.57861
Mobility Rate (%)	0.984125	0.183698	0.406617	0.0661686	0.127668	0.849653	0.719584	0.307764
Visible Frames	7500	7500	7500	7500	7500	7500	7500	7500
Visible Time (m:s)	0:05:00	0:05:00	0:05:00	0:05:00	0:05:00	0:05:00	0:05:00	0:05:00
Invisible Frames	0	0	0	0	0	0	0	0
Invisible Time (m:s)	0:00:00	0:00:00	0:00:00	0:00:00	0:00:00	0:00:00	0:00:00	0:00:00
First Visible Frame	7500	7500	7500	7500	7500	7500	7500	7500
Last Visible Frame	14999	14999	14999	14999	14999	14999	14999	14999
Visibility Rate (%)	1	1	1	1	1	1	1	1
Invisibility Rate (%)	0	0	0	0	0	0	0	0
Explored Areas	4	4	7	1	2	6	6	5
Number of Areas	9	9	9	9	9	9	9	9
Exploration Rate (%)	0.444444	0.444444	0.777778	0.111111	0.222222	0.666667	0.666667	0.555556
Total Distance (mm)	12331.4	280.113	763.518	117.753	259.613	6096.39	3104.26	596.155
Transitions In	0	0	0	0	0	0	0	0
Transitions Out	0	0	0	0	0	0	0	0
Frozen Events	0	3	15	2	5	7	6	7
Tot. Time Frozen (m:s)	0:00:00	0:04:41.440000	0:03:21.120000	0:04:59.920000	0:04:46.960000	0:00:36.160000	0:01:20.200000	0:03:46.160000
Avg. Time Frozen (m:s)	0:00:00	0:01:33.813000	0:00:13.408000	0:02:29.960000	0:00:57.392000	0:00:05.166000	0:00:13.367000	0:00:32.309000
6.25 g/L	Replicat
	1	2	3	4	5	6	7	8
Av. Speed (mm/s)	14.6629	2.4314	35.8725	3.31733	28.6054	26.8288	5.83804	14.4705
Mob. Av. Speed (mm/s)	15.8126	8.29306	36.4257	6.74288	31.0252	27.7901	12.0416	18.9525
Av. Accel (mm/s^2)	20.09	7.07948	50.2912	8.29718	30.2078	50.0789	7.97288	22.4533
Mobility Rate (%)	0.925294	0.270678	0.984658	0.469584	0.920616	0.962404	0.463961	0.757166
Visible Frames	7500	7500	7500	7500	7474	7026	7371	7470
Visible Time (m:s)	0:05:00	0:05:00	0:05:00	0:05:00	0:04:58.960000	0:04:41.040000	0:04:54.840000	0:04:58.800000
Invisible Frames	0	0	0	0	26	474	129	30
Invisible Time (m:s)	0:00:00	0:00:00	0:00:00	0:00:00	0:00:01.040000	0:00:18.960000	0:00:05.160000	0:00:01.200000
First Visible Frame	7500	7500	7500	7500	7500	7500	7500	7500
Last Visible Frame	14999	14999	14999	14999	14999	14999	14999	14999
Visibility Rate (%)	1	1	1	1	0.996533	0.9368	0.9828	0.996
Invisibility Rate (%)	0	0	0	0	0.00346667	0.0632	0.0172	0.004
Explored Areas	4	6	7	4	7	4	7	7
Number of Areas	9	9	9	9	9	9	9	9
Exploration Rate (%)	0.444444	0.666667	0.777778	0.444444	0.777778	0.444444	0.777778	0.777778
Total Distance (mm)	4420.98	763.06	10808.9	1031.8	8622.07	8096.83	1791.85	4375.69
Transitions In	0	0	0	0	0	0	0	0
Transitions Out	0	0	0	0	0	0	0	0
Frozen Events	3	8	0	8	3	0	5	11
Tot. Time Frozen (m:s)	0:00:20.960000	0:04:21.680000	0:00:00	0:02:56.160000	0:00:14.400000	0:00:00	0:03:08.280000	0:01:20.840000
Avg. Time Frozen (m:s)	0:00:06.987000	0:00:32.710000	0:00:00	0:00:22.020000	0:00:04.800000	0:00:00	0:00:37.656000	0:00:07.349000
15.6 g/L	Replicat
	1	2	3	4	5	6	7	8
Av. Speed (mm/s)	5.00395	22.6648	17.8344	33.962	32.6309	13.5699	10.6261	5.03414
Mob. Av. Speed (mm/s)	8.39832	24.1252	21.0652	34.3182	35.4843	16.6207	18.3206	9.16881
Av. Accel (mm/s^2)	10.1489	31.539	28.72	54.6812	40.2498	19.4906	21.9366	15.1802
Mobility Rate (%)	0.581933	0.935628	0.842805	0.989461	0.917524	0.804429	0.557956	0.532417
Visible Frames	7443	7181	7447	7500	7388	7229	7225	7500
Visible Time (m:s)	0:04:57.720000	0:04:47.240000	0:04:57.880000	0:05:00	0:04:55.520000	0:04:49.160000	0:04:49	0:05:00
Invisible Frames	57	319	53	0	112	271	275	0
Invisible Time (m:s)	0:00:02.280000	0:00:12.760000	0:00:02.120000	0:00:00	0:00:04.480000	0:00:10.840000	0:00:11	0:00:00
First Visible Frame	7500	7500	7500	7500	7500	7500	7500	7500
Last Visible Frame	14999	14999	14999	14999	14999	14999	14999	14999
Visibility Rate (%)	0.9924	0.957467	0.992933	1	0.985067	0.963867	0.963333	1
Invisibility Rate (%)	0.0076	0.0425333	0.00706667	0	0.0149333	0.0361333	0.0366667	0
Explored Areas	4	4	6	6	4	4	6	4
Number of Areas	9	9	9	9	9	9	9	9
Exploration Rate (%)	0.444444	0.444444	0.666667	0.666667	0.444444	0.444444	0.666667	0.444444
Total Distance (mm)	1532.57	6822.79	5388.82	10224.2	9840.31	4100.8	3233.65	1569.74
Transitions In	0	0	0	0	0	0	0	0
Transitions Out	0	0	0	0	0	0	0	0
Frozen Events	13	0	4	0	3	8	9	14
Tot. Time Frozen (m:s)	0:02:26.400000	0:00:00	0:00:22.160000	0:00:00	0:00:18.640000	0:00:55.040000	0:02:29.320000	0:02:34.400000
Avg. Time Frozen (m:s)	0:00:11.262000	0:00:00	0:00:05.540000	0:00:00	0:00:06.213000	0:00:06.880000	0:00:16.591000	0:00:11.029000

## Sheet: Video_d7
SC	Replicat
	1	2	3	4	5	6	7	8
Av. Speed (mm/s)	14.6531	3.30778	26.648	15.4233	14.1395	19.7396	31.2197	12.6364
Mob. Av. Speed (mm/s)	20.7261	5.84534	27.895	18.4779	15.9609	22.4505	34.8306	22.6305
Av. Accel (mm/s^2)	22.7657	7.08271	41.5206	30.5567	23.7317	29.1651	68.258	20.9529
Mobility Rate (%)	0.684002	0.546806	0.954509	0.831377	0.883138	0.876423	0.894877	0.553895
Visible Frames	7061	7471	7500	7500	7500	7473	7500	7500
Visible Time (m:s)	0:04:42.440000	0:04:58.840000	0:05:00	0:05:00	0:05:00	0:04:58.920000	0:05:00	0:05:00
Invisible Frames	439	29	0	0	0	27	0	0
Invisible Time (m:s)	0:00:17.560000	0:00:01.160000	0:00:00	0:00:00	0:00:00	0:00:01.080000	0:00:00	0:00:00
First Visible Frame	7500	7500	7500	7500	7500	7500	7500	7500
Last Visible Frame	14999	14999	14999	14999	14999	14999	14999	14999
Visibility Rate (%)	0.941467	0.996133	1	1	1	0.9964	1	1
Invisibility Rate (%)	0.0585333	0.00386667	0	0	0	0.0036	0	0
Explored Areas	4	4	6	5	4	4	6	5
Number of Areas	9	9	9	9	9	9	9	9
Exploration Rate (%)	0.444444	0.444444	0.666667	0.555556	0.444444	0.444444	0.666667	0.555556
Total Distance (mm)	4421.9	1032.33	8025.37	4655.74	4265.06	5964.84	9417.87	3823.03
Transitions In	0	0	0	0	0	0	0	0
Transitions Out	0	0	0	0	0	0	0	0
Frozen Events	11	16	0	4	4	5	2	4
Tot. Time Frozen (m:s)	0:01:25.920000	0:02:45.440000	0:00:00	0:00:44.960000	0:00:21.880000	0:00:21.440000	0:00:09.320000	0:02:27.160000
Avg. Time Frozen (m:s)	0:00:07.811000	0:00:10.340000	0:00:00	0:00:11.240000	0:00:05.470000	0:00:04.288000	0:00:04.660000	0:00:36.790000
NC	Replicat
	1	2	3	4	5	6	7	8
Av. Speed (mm/s)	3.12357	34.6796	32.7897	10.463	9.26385	7.1236	19.5096	2.38348
Mob. Av. Speed (mm/s)	6.7675	35.5538	36.3555	13.1299	12.2681	11.574	26.7204	3.73397
Av. Accel (mm/s^2)	6.99956	70.232	35.2474	20.9688	24.1604	11.4913	20.8456	6.78073
Mobility Rate (%)	0.442903	0.975053	0.897319	0.790955	0.740099	0.604989	0.726654	0.612193
Visible Frames	7500	7500	7240	7500	7276	7500	7500	7500
Visible Time (m:s)	0:05:00	0:05:00	0:04:49.600000	0:05:00	0:04:51.040000	0:05:00	0:05:00	0:05:00
Invisible Frames	0	0	260	0	224	0	0	0
Invisible Time (m:s)	0:00:00	0:00:00	0:00:10.400000	0:00:00	0:00:08.960000	0:00:00	0:00:00	0:00:00
First Visible Frame	7500	7500	7500	7500	7500	7500	7500	7500
Last Visible Frame	14999	14999	14999	14999	14999	14999	14999	14999
Visibility Rate (%)	1	1	0.965333	1	0.970133	1	1	1
Invisibility Rate (%)	0	0	0.0346667	0	0.0298667	0	0	0
Explored Areas	5	6	7	6	5	4	6	4
Number of Areas	9	9	9	9	9	9	9	9
Exploration Rate (%)	0.555556	0.666667	0.777778	0.666667	0.555556	0.444444	0.666667	0.444444
Total Distance (mm)	971.918	10466.1	9883.07	3195.1	2838.54	2158.91	5883.96	757.528
Transitions In	0	0	0	0	0	0	0	0
Transitions Out	0	0	0	0	0	0	0	0
Frozen Events	13	0	5	6	9	18	3	19
Tot. Time Frozen (m:s)	0:03:21.080000	0:00:00	0:00:23.280000	0:00:55.200000	0:00:53.200000	0:02:13.120000	0:01:19	0:02:18.280000
Avg. Time Frozen (m:s)	0:00:15.468000	0:00:00	0:00:04.656000	0:00:09.200000	0:00:05.911000	0:00:07.396000	0:00:26.333000	0:00:07.278000
PC	Replicat
	1	2	3	4	5	6	7	8
Av. Speed (mm/s)
Mob. Av. Speed (mm/s)
Av. Accel (mm/s^2)
Mobility Rate (%)
Visible Frames
Visible Time (m:s)
Invisible Frames
Invisible Time (m:s)
First Visible Frame
Last Visible Frame
Visibility Rate (%)
Invisibility Rate (%)
Explored Areas
Number of Areas
Exploration Rate (%)
Total Distance (mm)
Transitions In
Transitions Out
Frozen Events
Tot. Time Frozen (m:s)
Avg. Time Frozen (m:s)
0.4 g/L	Replicat
	1	2	3	4	5	6	7	8
Av. Speed (mm/s)	29.043	18.2898	16.8486	23.4584	14.2825	16.9098	62.2225	17.3726
Mob. Av. Speed (mm/s)	32.4307	20.604	19.0628	28.2109	23.2049	26.9334	62.4541	19.9184
Av. Accel (mm/s^2)	40.7292	30.011	41.7003	43.7596	23.8832	30.3184	56.8105	34.4547
Mobility Rate (%)	0.891328	0.88427	0.881137	0.829109	0.610726	0.613499	0.996252	0.869397
Visible Frames	7292	7461	7500	7500	7500	7308	7475	7500
Visible Time (m:s)	0:04:51.680000	0:04:58.440000	0:05:00	0:05:00	0:05:00	0:04:52.320000	0:04:59	0:05:00
Invisible Frames	208	39	0	0	0	192	25	0
Invisible Time (m:s)	0:00:08.320000	0:00:01.560000	0:00:00	0:00:00	0:00:00	0:00:07.680000	0:00:01	0:00:00
First Visible Frame	7500	7500	7500	7500	7500	7500	7500	7500
Last Visible Frame	14999	14999	14999	14999	14999	14999	14999	14999
Visibility Rate (%)	0.972267	0.9948	1	1	1	0.9744	0.996667	1
Invisibility Rate (%)	0.0277333	0.0052	0	0	0	0.0256	0.00333333	0
Explored Areas	4	6	6	6	7	4	4	6
Number of Areas	9	9	9	9	9	9	9	9
Exploration Rate (%)	0.444444	0.666667	0.666667	0.666667	0.777778	0.444444	0.444444	0.666667
Total Distance (mm)	8760	5516.64	5104.38	7081.82	4316.17	5135.65	18739.7	5254.64
Transitions In	0	0	0	0	0	0	0	0
Transitions Out	0	0	0	0	0	0	0	0
Frozen Events	3	4	2	6	11	10	0	2
Tot. Time Frozen (m:s)	0:00:25.440000	0:00:17.680000	0:00:24.560000	0:00:34.800000	0:02:08.280000	0:01:43.440000	0:00:00	0:00:10.520000
Avg. Time Frozen (m:s)	0:00:08.480000	0:00:04.420000	0:00:12.280000	0:00:05.800000	0:00:11.662000	0:00:10.344000	0:00:00	0:00:05.260000
1 g/L	Replicat
	1	2	3	4	5	6	7	8
Av. Speed (mm/s)	4.26595	4.94176	18.5169	2.82676	1.64449	5.51067	14.9759	20.3402
Mob. Av. Speed (mm/s)	6.07477	7.9682	21.2475	5.27425	4.31806	6.86989	18.3274	24.6859
Av. Accel (mm/s^2)	8.97457	11.0749	30.2998	8.17243	5.08846	11.6037	22.3906	29.9523
Mobility Rate (%)	0.665159	0.604722	0.869931	0.490795	0.34325	0.789888	0.812265	0.821105
Visible Frames	7079	7500	7500	7500	7500	7500	7440	7500
Visible Time (m:s)	0:04:43.160000	0:05:00	0:05:00	0:05:00	0:05:00	0:05:00	0:04:57.600000	0:05:00
Invisible Frames	421	0	0	0	0	0	60	0
Invisible Time (m:s)	0:00:16.840000	0:00:00	0:00:00	0:00:00	0:00:00	0:00:00	0:00:02.400000	0:00:00
First Visible Frame	7500	7500	7500	7500	7500	7500	7500	7500
Last Visible Frame	14999	14999	14999	14999	14999	14999	14999	14999
Visibility Rate (%)	0.943867	1	1	1	1	1	0.992	1
Invisibility Rate (%)	0.0561333	0	0	0	0	0	0.008	0
Explored Areas	4	5	4	4	4	4	6	4
Number of Areas	4	9	9	9	9	9	9	9
Exploration Rate (%)	1	0.555556	0.444444	0.444444	0.444444	0.444444	0.666667	0.444444
Total Distance (mm)	1298.35	1519.86	5581.36	915.946	524.51	1689.65	4519.69	6139.98
Transitions In	0	0	0	0	0	0	0	0
Transitions Out	0	0	0	0	0	0	0	0
Frozen Events	12	13	4	19	8	9	6	5
Tot. Time Frozen (m:s)	0:01:30.840000	0:02:16.520000	0:00:37.680000	0:03:19.520000	0:03:21.640000	0:00:53.520000	0:00:58.200000	0:00:23.240000
Avg. Time Frozen (m:s)	0:00:07.570000	0:00:10.502000	0:00:09.420000	0:00:10.501000	0:00:25.205000	0:00:05.947000	0:00:09.700000	0:00:04.648000
2.5 g/L	Replicat
	1	2	3	4	5	6	7	8
Av. Speed (mm/s)	16.9429	4.08355	0.680642	1.85198	0.762356	31.0113	9.53767	2.12552
Mob. Av. Speed (mm/s)	17.7408	8.44667	3.2071	4.3027	2.96976	33.4066	12.7763	7.1701
Av. Accel (mm/s^2)	36.6867	7.2272	2.8452	5.30112	2.78464	56.6545	18.1521	4.46803
Mobility Rate (%)	0.952614	0.454667	0.162086	0.382871	0.206243	0.927428	0.738794	0.272946
Visible Frames	7348	7460	7500	7500	7500	7500	7500	7500
Visible Time (m:s)	0:04:53.920000	0:04:58.400000	0:05:00	0:05:00	0:05:00	0:05:00	0:05:00	0:05:00
Invisible Frames	152	40	0	0	0	0	0	0
Invisible Time (m:s)	0:00:06.080000	0:00:01.600000	0:00:00	0:00:00	0:00:00	0:00:00	0:00:00	0:00:00
First Visible Frame	7500	7500	7500	7500	7500	7500	7500	7500
Last Visible Frame	14999	14999	14999	14999	14999	14999	14999	14999
Visibility Rate (%)	0.979733	0.994667	1	1	1	1	1	1
Invisibility Rate (%)	0.0202667	0.00533333	0	0	0	0	0	0
Explored Areas	7	4	4	4	4	5	6	5
Number of Areas	9	9	9	9	6	9	9	9
Exploration Rate (%)	0.777778	0.444444	0.444444	0.444444	0.666667	0.555556	0.666667	0.555556
Total Distance (mm)	5138.81	1260.32	236.004	619.685	256.18	9341.05	2886.52	671.008
Transitions In	0	0	0	0	0	0	0	0
Transitions Out	0	0	0	0	0	0	0	0
Frozen Events	0	15	5	5	8	1	10	6
Tot. Time Frozen (m:s)	0:00:00	0:03:19.160000	0:04:31.400000	0:03:27.240000	0:04:20.520000	0:00:04.840000	0:01:07.720000	0:03:45.440000
Avg. Time Frozen (m:s)	0:00:00	0:00:13.277000	0:00:54.280000	0:00:41.448000	0:00:32.565000	0:00:04.840000	0:00:06.772000	0:00:37.573000
6.25 g/L	Replicat
	1	2	3	4	5	6	7	8
Av. Speed (mm/s)	1.61732	0.589023	26.1687	4.53409	3.3115	16.3454	19.3523	17.3451
Mob. Av. Speed (mm/s)	7.2558	4.31158	27.8707	7.32369	5.80616	20.5684	21.6749	21.6888
Av. Accel (mm/s^2)	4.23202	1.91073	35.0571	9.09363	7.16667	29.2228	24.2832	19.9395
Mobility Rate (%)	0.192614	0.101521	0.936723	0.602721	0.545358	0.789791	0.889607	0.795552
Visible Frames	7423	7500	7321	7500	7500	7468	7432	7468
Visible Time (m:s)	0:04:56.920000	0:05:00	0:04:52.840000	0:05:00	0:05:00	0:04:58.720000	0:04:57.280000	0:04:58.720000
Invisible Frames	77	0	179	0	0	32	68	32
Invisible Time (m:s)	0:00:03.080000	0:00:00	0:00:07.160000	0:00:00	0:00:00	0:00:01.280000	0:00:02.720000	0:00:01.280000
First Visible Frame	7500	7500	7500	7500	7500	7500	7500	7500
Last Visible Frame	14999	14999	14999	14999	14999	14999	14999	14999
Visibility Rate (%)	0.989733	1	0.976133	1	1	0.995733	0.990933	0.995733
Invisibility Rate (%)	0.0102667	0	0.0238667	0	0	0.00426667	0.00906667	0.00426667
Explored Areas	4	3	4	6	6	8	4	8
Number of Areas	9	9	9	9	9	9	9	9
Exploration Rate (%)	0.444444	0.333333	0.444444	0.666667	0.666667	0.888889	0.444444	0.888889
Total Distance (mm)	508.523	196.129	7896.89	1390.55	1038.75	4929.96	5831.71	5222.94
Transitions In	0	0	0	0	0	0	0	0
Transitions Out	0	0	0	0	0	0	0	0
Frozen Events	9	7	1	11	10	5	5	10
Tot. Time Frozen (m:s)	0:04:13.560000	0:04:36.760000	0:00:11.840000	0:02:11.040000	0:02:14.520000	0:00:50.680000	0:00:22.080000	0:00:59.600000
Avg. Time Frozen (m:s)	0:00:28.173000	0:00:39.537000	0:00:11.840000	0:00:11.913000	0:00:13.452000	0:00:10.136000	0:00:04.416000	0:00:05.960000
15.6 g/L	Replicat
	1	2	3	4	5	6	7	8
Av. Speed (mm/s)	5.11993	4.79601	6.92736	31.6035	8.44456	22.9052	0.223603	35.0368
Mob. Av. Speed (mm/s)	8.14151	8.81243	10.779	32.4302	10.1667	23.6113	1.3804	38.496
Av. Accel (mm/s^2)	8.15152	7.92149	14.8497	51.5014	14.3813	35.2071	1.35411	61.6348
Mobility Rate (%)	0.610619	0.51811	0.63259	0.973713	0.820223	0.96945	0.0278815	0.909152
Visible Frames	7462	7348	7448	7384	7352	7500	7500	7500
Visible Time (m:s)	0:04:58.480000	0:04:53.920000	0:04:57.920000	0:04:55.360000	0:04:54.080000	0:05:00	0:05:00	0:05:00
Invisible Frames	38	152	52	116	148	0	0	0
Invisible Time (m:s)	0:00:01.520000	0:00:06.080000	0:00:02.080000	0:00:04.640000	0:00:05.920000	0:00:00	0:00:00	0:00:00
First Visible Frame	7500	7500	7500	7500	7500	7500	7500	7500
Last Visible Frame	14999	14999	14999	14999	14999	14999	14999	14999
Visibility Rate (%)	0.994933	0.979733	0.993067	0.984533	0.980267	1	1	1
Invisibility Rate (%)	0.00506667	0.0202667	0.00693333	0.0154667	0.0197333	0	0	0
Explored Areas	4	4	6	4	4	8	1	6
Number of Areas	9	9	9	9	9	9	9	9
Exploration Rate (%)	0.444444	0.444444	0.666667	0.444444	0.444444	0.888889	0.111111	0.666667
Total Distance (mm)	1557.53	1461.14	2109.11	9525.87	2558.58	6904.71	94.9342	10559.6
Transitions In	0	0	0	0	0	0	0	0
Transitions Out	0	0	0	0	0	0	0	0
Frozen Events	18	12	10	0	7	0	1	3
Tot. Time Frozen (m:s)	0:02:14.120000	0:02:21.880000	0:01:34.960000	0:00:00	0:00:42.280000	0:00:00	0:04:59.960000	0:00:21.360000
Avg. Time Frozen (m:s)	0:00:07.451000	0:00:11.823000	0:00:09.496000	0:00:00	0:00:06.040000	0:00:00	0:04:59.960000	0:00:07.120000

## Sheet: Video_d14
SC	Replicat
	1	2	3	4	5	6	7	8
Av. Speed (mm/s)	1.60782	4.76757	2.36234	13.7942	1.26894	3.64345	18.6482	18.7537
Mob. Av. Speed (mm/s)	4.0405	7.10985	4.90307	17.5279	5.14017	5.60752	22.1568	23.5795
Av. Accel (mm/s^2)	4.3264	11.636	5.16767	21.0212	3.09362	6.58465	36.9415	27.9781
Mobility Rate (%)	0.354588	0.656483	0.454376	0.778608	0.212602	0.628869	0.838314	0.784452
Visible Frames	7469	7500	7500	7362	7384	7500	7500	7246
Visible Time (m:s)	0:04:58.760000	0:05:00	0:05:00	0:04:54.480000	0:04:55.360000	0:05:00	0:05:00	0:04:49.840000
Invisible Frames	31	0	0	138	116	0	0	254
Invisible Time (m:s)	0:00:01.240000	0:00:00	0:00:00	0:00:05.520000	0:00:04.640000	0:00:00	0:00:00	0:00:10.160000
First Visible Frame	7500	7500	7500	7500	7500	7500	7500	7500
Last Visible Frame	14999	14999	14999	14999	14999	14999	14999	14999
Visibility Rate (%)	0.995867	1	1	0.9816	0.984533	1	1	0.966133
Invisibility Rate (%)	0.00413333	0	0	0.0184	0.0154667	0	0	0.0338667
Explored Areas	4	4	6	4	4	4	4	6
Number of Areas	9	9	9	9	9	9	9	9
Exploration Rate (%)	0.444444	0.444444	0.666667	0.444444	0.444444	0.444444	0.444444	0.666667
Total Distance (mm)	506.683	1468.11	734.151	4177.41	397.852	1115.93	5624.34	5674.32
Transitions In	0	0	0	0	0	0	0	0
Transitions Out	0	0	0	0	0	0	0	0
Frozen Events	12	12	14	4	9	11	5	8
Tot. Time Frozen (m:s)	0:03:33.600000	0:01:40.800000	0:03:04.320000	0:01:07.040000	0:04:26.880000	0:01:54.880000	0:00:18.400000	0:01:02.920000
Avg. Time Frozen (m:s)	0:00:17.800000	0:00:08.400000	0:00:13.166000	0:00:16.760000	0:00:29.653000	0:00:10.444000	0:00:03.680000	0:00:07.865000
NC	Replicat
	1	2	3	4	5	6	7	8
Av. Speed (mm/s)	28.2642	20.8214	17.446	20.1924	8.13349	3.17876	4.39937	1.15321
Mob. Av. Speed (mm/s)	34.0955	22.0041	25.4268	21.6169	9.88649	7.89416	5.20875	4.78738
Av. Accel (mm/s^2)	46.1768	45.793	22.7901	28.5433	17.7087	7.35122	9.81457	5.5211
Mobility Rate (%)	0.826797	0.942367	0.682764	0.929722	0.813714	0.38048	0.826974	0.207177
Visible Frames	7475	7170	7500	7204	7471	7463	7500	7500
Visible Time (m:s)	0:04:59	0:04:46.800000	0:05:00	0:04:48.160000	0:04:58.840000	0:04:58.520000	0:05:00	0:05:00
Invisible Frames	25	330	0	296	29	37	0	0
Invisible Time (m:s)	0:00:01	0:00:13.200000	0:00:00	0:00:11.840000	0:00:01.160000	0:00:01.480000	0:00:00	0:00:00
First Visible Frame	7500	7500	7500	7500	7500	7500	7500	7500
Last Visible Frame	14999	14999	14999	14999	14999	14999	14999	14999
Visibility Rate (%)	0.996667	0.956	1	0.960533	0.996133	0.995067	1	1
Invisibility Rate (%)	0.00333333	0.044	0	0.0394667	0.00386667	0.00493333	0	0
Explored Areas	4	4	6	8	4	4	4	2
Number of Areas	9	9	9	9	9	9	9	9
Exploration Rate (%)	0.444444	0.444444	0.666667	0.888889	0.444444	0.444444	0.444444	0.222222
Total Distance (mm)	8528.18	6299.09	5270.22	6094.15	2489.46	977.925	1374.66	376.639
Transitions In	0	0	0	0	0	0	0	0
Transitions Out	0	0	0	0	0	0	0	0
Frozen Events	8	0	12	1	7	16	4	11
Tot. Time Frozen (m:s)	0:00:42.240000	0:00:00	0:01:40.960000	0:00:04	0:00:46.280000	0:03:21.360000	0:00:27.560000	0:04:29.560000
Avg. Time Frozen (m:s)	0:00:05.280000	0:00:00	0:00:08.413000	0:00:04	0:00:06.611000	0:00:12.585000	0:00:06.890000	0:00:24.505000
PC	Replicat
	1	2	3	4	5	6	7	8
Av. Speed (mm/s)
Mob. Av. Speed (mm/s)
Av. Accel (mm/s^2)
Mobility Rate (%)
Visible Frames
Visible Time (m:s)
Invisible Frames
Invisible Time (m:s)
First Visible Frame
Last Visible Frame
Visibility Rate (%)
Invisibility Rate (%)
Explored Areas
Number of Areas
Exploration Rate (%)
Total Distance (mm)
Transitions In
Transitions Out
Frozen Events
Tot. Time Frozen (m:s)
Avg. Time Frozen (m:s)
0.4 g/L	Replicat
	1	2	3	4	5	6	7	8
Av. Speed (mm/s)	20.9661	6.45274	22.744	24.6297	12.9159	6.26981	8.7759	25.8529
Mob. Av. Speed (mm/s)	24.2731	9.02344	24.0723	29.6467	20.4274	8.12481	17.5387	29.1741
Av. Accel (mm/s^2)	36.8654	10.976	43.2863	47.0357	23.8441	14.9237	16.7245	49.2008
Mobility Rate (%)	0.861182	0.702145	0.943058	0.820056	0.619496	0.759205	0.491862	0.883084
Visible Frames	7467	7464	7415	7134	7339	7500	7500	7411
Visible Time (m:s)	0:04:58.680000	0:04:58.560000	0:04:56.600000	0:04:45.360000	0:04:53.560000	0:05:00	0:05:00	0:04:56.440000
Invisible Frames	33	36	85	366	161	0	0	89
Invisible Time (m:s)	0:00:01.320000	0:00:01.440000	0:00:03.400000	0:00:14.640000	0:00:06.440000	0:00:00	0:00:00	0:00:03.560000
First Visible Frame	7500	7500	7500	7500	7500	7500	7500	7500
Last Visible Frame	14999	14999	14999	14999	14999	14999	14999	14999
Visibility Rate (%)	0.9956	0.9952	0.988667	0.9512	0.978533	1	1	0.988133
Invisibility Rate (%)	0.0044	0.0048	0.0113333	0.0488	0.0214667	0	0	0.0118667
Explored Areas	4	4	6	7	4	4	4	4
Number of Areas	9	9	9	9	9	9	9	9
Exploration Rate (%)	0.444444	0.444444	0.666667	0.777778	0.444444	0.444444	0.444444	0.444444
Total Distance (mm)	6325.93	1966.77	6867.09	7433.97	3908.65	1917.48	2669.72	7811.27
Transitions In	0	0	0	0	0	0	0	0
Transitions Out	0	0	0	0	0	0	0	0
Frozen Events	7	13	2	5	8	5	12	3
Tot. Time Frozen (m:s)	0:00:40.720000	0:01:40.280000	0:00:09.040000	0:00:30.560000	0:01:53.840000	0:00:43.080000	0:02:27.560000	0:00:11.680000
Avg. Time Frozen (m:s)	0:00:05.817000	0:00:07.714000	0:00:04.520000	0:00:06.112000	0:00:14.230000	0:00:08.616000	0:00:12.297000	0:00:03.893000
1 g/L	Replicat
	1	2	3	4	5	6	7	8
Av. Speed (mm/s)	6.78465	24.3727	24.8167	10.8286	9.48281	6.88856	12.7606	6.64733
Mob. Av. Speed (mm/s)	8.61043	29.1121	25.9252	15.4182	11.6371	8.77339	13.985	15.5074
Av. Accel (mm/s^2)	13.66	24.9946	36.3985	16.5022	17.1984	12.9802	19.4118	11.6907
Mobility Rate (%)	0.776814	0.830012	0.956152	0.694771	0.806746	0.770267	0.907471	0.410462
Visible Frames	7500	7281	7416	7500	7357	7356	7245	7364
Visible Time (m:s)	0:05:00	0:04:51.240000	0:04:56.640000	0:05:00	0:04:54.280000	0:04:54.240000	0:04:49.800000	0:04:54.560000
Invisible Frames	0	219	84	0	143	144	255	136
Invisible Time (m:s)	0:00:00	0:00:08.760000	0:00:03.360000	0:00:00	0:00:05.720000	0:00:05.760000	0:00:10.200000	0:00:05.440000
First Visible Frame	7500	7500	7500	7500	7500	7500	7500	7500
Last Visible Frame	14999	14999	14999	14999	14999	14999	14999	14999
Visibility Rate (%)	1	0.9708	0.9888	1	0.980933	0.9808	0.966	0.981867
Invisibility Rate (%)	0	0.0292	0.0112	0	0.0190667	0.0192	0.034	0.0181333
Explored Areas	4	4	4	4	4	4	5	6
Number of Areas	9	9	9	9	9	9	9	9
Exploration Rate (%)	0.444444	0.444444	0.444444	0.444444	0.444444	0.444444	0.555556	0.666667
Total Distance (mm)	2069.61	7345.05	7468.16	3275.92	2873.7	2096.2	3861.11	2037.58
Transitions In	0	0	0	0	0	0	0	0
Transitions Out	0	0	0	0	0	0	0	0
Frozen Events	8	8	2	13	9	5	2	9
Tot. Time Frozen (m:s)	0:00:57.520000	0:00:49.360000	0:00:08.600000	0:01:31.320000	0:00:56.080000	0:00:55.960000	0:00:19.600000	0:03:12.720000
Avg. Time Frozen (m:s)	0:00:07.190000	0:00:06.170000	0:00:04.300000	0:00:07.025000	0:00:06.231000	0:00:11.192000	0:00:09.800000	0:00:21.413000
2.5 g/L	Replicat
	1	2	3	4	5	6	7	8
Av. Speed (mm/s)	21.9166	0.931852	1.55814	4.80312	0.772331	32.3903	13.1667	17.0042
Mob. Av. Speed (mm/s)	23.5842	2.87072	3.9616	6.04866	2.79853	33.4389	15.7161	19.0531
Av. Accel (mm/s^2)	41.593	3.69547	4.32416	13.8234	3.21879	55.9842	23.3648	33.8847
Mobility Rate (%)	0.927236	0.242263	0.337647	0.77588	0.224386	0.966977	0.832418	0.890208
Visible Frames	7439	7500	7500	7500	7500	7211	7469	7500
Visible Time (m:s)	0:04:57.560000	0:05:00	0:05:00	0:05:00	0:05:00	0:04:48.440000	0:04:58.760000	0:05:00
Invisible Frames	61	0	0	0	0	289	31	0
Invisible Time (m:s)	0:00:02.440000	0:00:00	0:00:00	0:00:00	0:00:00	0:00:11.560000	0:00:01.240000	0:00:00
First Visible Frame	7500	7500	7500	7500	7500	7500	7500	7500
Last Visible Frame	14999	14999	14999	14999	14999	14999	14999	14999
Visibility Rate (%)	0.991867	1	1	1	1	0.961467	0.995867	1
Invisibility Rate (%)	0.00813333	0	0	0	0	0.0385333	0.00413333	0
Explored Areas	4	3	6	6	2	4	7	4
Number of Areas	9	9	9	9	9	9	9	9
Exploration Rate (%)	0.444444	0.333333	0.666667	0.666667	0.222222	0.444444	0.777778	0.444444
Total Distance (mm)	6611.92	325.46	508.545	1549.37	259.334	9783.49	3984.55	5122.46
Transitions In	0	0	0	0	0	0	0	0
Transitions Out	0	0	0	0	0	0	0	0
Frozen Events	0	10	13	3	9	0	5	4
Tot. Time Frozen (m:s)	0:00:00	0:04:43.480000	0:04:07.280000	0:00:18.560000	0:04:26.760000	0:00:00	0:00:30.920000	0:00:32.240000
Avg. Time Frozen (m:s)	0:00:00	0:00:28.348000	0:00:19.022000	0:00:06.187000	0:00:29.640000	0:00:00	0:00:06.184000	0:00:08.060000
6.25 g/L	Replicat
	1	2	3	4	5	6	7	8
Av. Speed (mm/s)	6.07575	0.555981	16.3851	0.638628	1.67818	6.52456	3.71583	4.45531
Mob. Av. Speed (mm/s)	8.99087	3.13889	17.3173	2.90146	3.12097	8.83634	6.4161	8.71939
Av. Accel (mm/s^2)	9.24145	2.2033	23.102	2.2869	4.94698	14.2832	7.71544	9.31443
Mobility Rate (%)	0.662332	0.108058	0.943352	0.169157	0.485059	0.72837	0.561766	0.495864
Visible Frames	7464	7500	7330	7500	7500	7459	7500	7500
Visible Time (m:s)	0:04:58.560000	0:05:00	0:04:53.200000	0:05:00	0:05:00	0:04:58.360000	0:05:00	0:05:00
Invisible Frames	36	0	170	0	0	41	0	0
Invisible Time (m:s)	0:00:01.440000	0:00:00	0:00:06.800000	0:00:00	0:00:00	0:00:01.640000	0:00:00	0:00:00
First Visible Frame	7500	7500	7500	7500	7500	7500	7500	7500
Last Visible Frame	14999	14999	14999	14999	14999	14999	14999	14999
Visibility Rate (%)	0.9952	1	0.977333	1	1	0.994533	1	1
Invisibility Rate (%)	0.0048	0	0.0226667	0	0	0.00546667	0	0
Explored Areas	4	3	5	3	4	4	6	4
Number of Areas	9	9	9	9	9	9	9	9
Exploration Rate (%)	0.444444	0.333333	0.555556	0.333333	0.444444	0.444444	0.666667	0.444444
Total Distance (mm)	1840.54	194.082	4951.79	212.576	549.511	2002.77	1141.28	1363.72
Transitions In	0	0	0	0	0	0	0	0
Transitions Out	0	0	0	0	0	0	0	0
Frozen Events	9	6	0	8	8	11	13	9
Tot. Time Frozen (m:s)	0:01:24.760000	0:04:41.840000	0:00:00	0:04:32.080000	0:03:03.960000	0:01:41.480000	0:02:16.120000	0:02:34.920000
Avg. Time Frozen (m:s)	0:00:09.418000	0:00:46.973000	0:00:00	0:00:34.010000	0:00:22.995000	0:00:09.225000	0:00:10.471000	0:00:17.213000
15.6 g/L	Replicat
	1	2	3	4	5	6	7	8
Av. Speed (mm/s)	20.6927	3.42209	26.2916	4.35108	24.5162	22.4091	1.32968	38.049
Mob. Av. Speed (mm/s)	22.4567	6.39175	28.1782	6.67747	25.3467	23.3978	4.01801	39.3037
Av. Accel (mm/s^2)	29.5576	8.91982	49.3784	9.91805	29.6083	33.9135	4.71903	61.65
Mobility Rate (%)	0.919672	0.492682	0.931207	0.638349	0.966533	0.955218	0.296025	0.967583
Visible Frames	7436	7315	7403	7467	7474	7239	7500	7500
Visible Time (m:s)	0:04:57.440000	0:04:52.600000	0:04:56.120000	0:04:58.680000	0:04:58.960000	0:04:49.560000	0:05:00	0:05:00
Invisible Frames	64	185	97	33	26	261	0	0
Invisible Time (m:s)	0:00:02.560000	0:00:07.400000	0:00:03.880000	0:00:01.320000	0:00:01.040000	0:00:10.440000	0:00:00	0:00:00
First Visible Frame	7500	7500	7500	7500	7500	7500	7500	7500
Last Visible Frame	14999	14999	14999	14999	14999	14999	14999	14999
Visibility Rate (%)	0.991467	0.975333	0.987067	0.9956	0.996533	0.9652	1	1
Invisibility Rate (%)	0.00853333	0.0246667	0.0129333	0.0044	0.00346667	0.0348	0	0
Explored Areas	4	4	6	4	4	6	6	6
Number of Areas	9	9	9	9	6	9	9	9
Exploration Rate (%)	0.444444	0.444444	0.666667	0.444444	0.666667	0.666667	0.666667	0.666667
Total Distance (mm)	6226.68	1061.52	7922.67	1362.31	7376.25	6758.98	437.645	11457.5
Transitions In	0	0	0	0	0	0	0	0
Transitions Out	0	0	0	0	0	0	0	0
Frozen Events	4	19	1	11	0	1	11	0
Tot. Time Frozen (m:s)	0:00:16.320000	0:02:38.520000	0:00:04.160000	0:01:58.280000	0:00:00	0:00:04.480000	0:04:16.520000	0:00:00
Avg. Time Frozen (m:s)	0:00:04.080000	0:00:08.343000	0:00:04.160000	0:00:10.753000	0:00:00	0:00:04.480000	0:00:23.320000	0:00:00
								MW
								min
